# Supplementary material for: Hierarchical architecture of dopaminergic circuits enables second-order conditioning in Drosophila
Source: eLife journal article supplement (doi:10.7554/elife.79042), 2023-01-24
Supplement: fig3-data1 [file Figure_3C_Source_data.xlsx]

## Sheet: Sheet1
		S2+							S2-
		Trial1	Trial2	Trial3	Trial4	Trial5			Trial1	Trial2	Trial3	Trial4	Trial5
	Mean	5.12009	3.62586	2.59698	2.70589	2.38441		Mean	3.98999	2.80868	2.98116	3.21865	2.58066
	SEM	0.967841	1.08596	0.861446	1.02283	0.759702		SEM	1.02625	1.23151	1.01048	1.28567	0.986992
Dotted line	Fly1	2.86265	2.1143	0.702575	1.75503	0.735853	Dotted line	Fly1	4.84184	0.874357	1.46349	1.03649	1.398
	Fly2	8.96592	4.30159	5.16012	7.83998	2.89981		Fly2	8.11196	-0.507949	5.94488	7.78456	7.13572
	Fly3	7.22253	9.31141	6.47239	8.41178	7.09127		Fly3	4.33655	6.78106	1.84735	6.9227	3.47242
	Fly4	4.79363	3.20223	0.346264	2.05618	4.73663		Fly4	4.63103	5.0951	5.35931	7.14389	6.78421
	Fly5	6.44599	3.09394	2.16497	2.31946	2.90259		Fly5	5.29144	0.742777	4.74962	-2.56338	1.68298
	Fly6	6.91022	4.08756	4.63898	2.1879	2.15617		Fly6	6.58774	7.34124	9.75815	6.49338	7.00007
Solid line	Fly1	3.67097	1.8021	1.2256	-0.171976	-0.475595	Solid line	Fly1	3.77869	2.74537	1.58971	1.5435	1.64659
	Fly2	5.30217	5.17727	5.50591	5.59139	4.69114		Fly2	1.86085	2.25893	1.82537	2.1429	1.91036
	Fly3	2.57388	1.72252	0.227423	0.962155	0.71854		Fly3	0.876855	0.880561	0.73598	0.83749	-0.317351
	Fly4	3.66923	1.20201	0.0907719	0.246716	0.951447		Fly4	1.47694	2.74355	1.06578	0.176647	1.52712
	Fly5	8.24874	6.67183	2.59556	2.88148	2.77796		Fly5	3.6921	0.836073	1.0705	3.61455	0.308202
	Fly6	1.28317	0.317598	0.339516	0.788154	1.24205		Fly6	0.78508	-0.460472	0.810535	1.25948	0.180417
	Fly7	1.66415	-0.363379	2.00131	0.443425	1.26148		Fly7	0.498363	0.0316363	1.11598	0.718253	0.218193
