# Supplementary material for: Hierarchical architecture of dopaminergic circuits enables second-order conditioning in Drosophila
Source: eLife journal article supplement (doi:10.7554/elife.79042), 2023-01-24
Supplement: fig3-data1 [file Figure_3E_Source_data.xlsx]

## Sheet: Sheet1
		S2+							S2-
		Trial1	Trial2	Trial3	Trial4	Trial5			Trial1	Trial2	Trial3	Trial4	Trial5
	Mean	4.16301	4.25599	4.08104	3.75294	3.66244		Mean	3.53427	2.65043	3.99584	4.35655	4.10604
	SEM	1.28938	1.95057	0.662726	1.47953	1.21537		SEM	1.43053	1.43054	1.72733	1.76927	1.69219
Dotted line	Fly1	3.34711	4.59354	5.32696	4.79806	4.76706	Dotted line	Fly1	5.26976	2.12769	6.0587	3.0923	3.19071
	Fly2	3.24395	1.51645	3.56949	-0.307701	3.05228		Fly2	2.32959	1.18971	1.06088	0.57051	0.462086
	Fly3	0.746595	1.0368	2.12345	-1.00809	-0.597089		Fly3	0.530202	0.841939	3.02761	0.184951	0.219894
	Fly4	1.40013	3.05327	2.7909	2.94143	3.06972		Fly4	1.89067	2.47144	1.51764	3.59555	1.23815
Solid line	Fly1	5.56676	3.54645	4.96599	6.39193	7.43533	Solid line	Fly1	-0.489576	3.14217	-0.708311	2.94739	7.77651
	Fly2	5.99247	0.575714	5.24397	5.40049	2.87594		Fly2	6.90213	-1.20206	4.42719	7.11323	6.66689
	Fly3	4.32858	7.60666	3.14262	5.05073	2.69302		Fly3	4.87512	4.12198	6.81274	6.82149	4.43443
	Fly4	8.67848	12.1191	5.48495	6.75666	6.00322		Fly4	6.96629	8.51062	9.77028	10.527	8.85964
