# Supplementary material for: Hierarchical architecture of dopaminergic circuits enables second-order conditioning in Drosophila
Source: eLife journal article supplement (doi:10.7554/elife.79042), 2023-01-24
Supplement: fig3-figsupp2-data1 [file Figure_3-figure-supplement2B_Source_data.xlsx]

## Sheet: Sheet1
	Time Trace						Raster Plot (Spike timing, sec)
	OCT(CS+)		MCH(CS-)				OCT(CS+)										MCH(CS-)
Time (x10^-4) (sec)	Pre	Post	Pre	Post			Pre					Post					Pre					Post
1	-63.22	-63.8445	-64.5742	-62.3424			Trial1	Trial2	Trial3	Trial4	Trial5	Trial1	Trial2	Trial3	Trial4	Trial5	Trial1	Trial2	Trial3	Trial4	Trial5	Trial1	Trial2	Trial3	Trial4	Trial5
2	-63.2101	-63.8314	-64.5315	-62.2997			0.2708	0.4808	0.3124	0.4998	0.0072001	0.4907	0.4893	0.4717	0.0207001	0.482	0.5362	0.0303999	0.0433999	0.4795	0.4975	0.2737	0.4927	0.4539	0.49	0.4969
3	-63.1871	-63.8511	-64.5216	-62.3325			0.4559	0.4948	0.4203	0.5085	0.0463	0.5032	0.5009	0.4826	0.116	0.4934	0.5551	0.1061	0.5064	0.4991	0.5211	0.4807	0.5051	0.4742	0.5021	0.5101
4	-63.2167	-63.8412	-64.5249	-62.3194			0.4972	0.5021	0.4904	0.5147	0.0798	0.5155	0.5141	0.49	0.4745	0.4999	0.5721	0.313	0.5192	0.5159	0.5356	0.4945	0.5171	0.4902	0.5145	0.5237
5	-63.2594	-63.8281	-64.5841	-62.2898			0.5135	0.5073	0.5002	0.5208	0.1174	0.5304	0.5249	0.5021	0.4875	0.5109	0.5896	0.3979	0.531	0.5266	0.5485	0.5079	0.5317	0.5026	0.5288	0.5338
6	-63.2627	-63.8215	-64.5315	-62.3029			0.5246	0.5137	0.5093	0.5293	0.1665	0.5411	0.535	0.5143	0.495	0.523	0.6012	0.5076	0.5422	0.5417	0.5645	0.5234	0.5424	0.5156	0.5468	0.5486
7	-63.243	-63.8544	-64.5447	-62.2701			0.5358	0.5214	0.5173	0.5367	0.2806	0.5621	0.5545	0.5276	0.5029	0.534	0.6147	0.5231	0.5548	0.5564	0.5751	0.5353	0.5567	0.528	0.5629	0.5622
8	-63.2069	-63.8807	-64.5874	-62.2536			0.5452	0.5291	0.5245	0.5432	0.3308	0.5858	0.5693	0.5437	0.511	0.5492	0.6325	0.5385	0.5695	0.5673	0.5866	0.5445	0.5672	0.5409	0.5758	0.574
9	-63.1345	-63.8708	-64.5907	-62.2142			0.5549	0.5377	0.5317	0.5537	0.3442	0.6135	0.5866	0.5646	0.5197	0.5648	0.6491	0.5498	0.5827	0.5791	0.5962	0.5605	0.584	0.5557	0.5852	0.5862
10	-63.0918	-63.9333	-64.5973	-62.2405			0.564	0.5448	0.5394	0.5634	0.363	0.6464	0.6187	0.5858	0.5296	0.5836	0.6692	0.5599	0.5933	0.5913	0.6029	0.5708	0.601	0.5705	0.6069	0.6038
11	-63.0951	-63.8971	-64.5775	-62.3062			0.5745	0.5535	0.547	0.5754	0.3768	0.6695	0.6621	0.6107	0.5421	0.6087	0.6863	0.5699	0.6045	0.6049	0.6155	0.5837	0.6132	0.584	0.6226	0.6184
12	-63.1017	-63.9004	-64.5414	-62.2734			0.5892	0.5617	0.5538	0.5882	0.3899	0.7022	0.6961	0.6362	0.5605	0.6335	0.6989	0.5784	0.6175	0.6187	0.6288	0.5966	0.6318	0.5984	0.6415	0.6324
13	-63.174	-63.9333	-64.5644	-62.2865			0.6018	0.5713	0.5622	0.5988	0.4156	0.741	0.729	0.662	0.576	0.6697	0.7146	0.5903	0.6323	0.6352	0.6434	0.6085	0.649	0.6144	0.6591	0.6522
14	-63.197	-63.8938	-64.5381	-62.3062			0.6118	0.5795	0.5707	0.6095	0.4375	0.7782	0.7487	0.686	0.6056	0.6926	0.7322	0.6007	0.6417	0.6509	0.6557	0.6208	0.6603	0.6371	0.6807	0.6673
15	-63.2036	-63.953	-64.5315	-62.2865			0.6213	0.5879	0.5813	0.6197	0.4722	0.8199	0.7782	0.7134	0.6309	0.7184	0.7492	0.6132	0.6514	0.6713	0.6641	0.6352	0.6786	0.658	0.6997	0.6816
16	-63.1641	-63.9366	-64.5578	-62.3325			0.6348	0.5958	0.5907	0.6321	0.4803	0.8575	0.8121	0.7691	0.6644	0.7403	0.7645	0.6242	0.6642	0.688	0.6761	0.6503	0.6966	0.6802	0.7172	0.6923
17	-63.1411	-63.9662	-64.5348	-62.3259			0.645	0.6057	0.6034	0.642	0.4874	0.8957	0.8363	0.8194	0.6939	0.7672	0.7785	0.6358	0.6783	0.7013	0.6905	0.6664	0.7108	0.7014	0.7298	0.7111
18	-63.1641	-64.0056	-64.5611	-62.2175			0.6602	0.6158	0.6107	0.6531	0.4938	0.9322	0.8669	0.8552	0.7469	0.7973	0.7962	0.6474	0.6923	0.7136	0.7038	0.6816	0.7259	0.7214	0.7477	0.7257
19	-63.1444	-63.9727	-64.6466	-62.3029			0.6747	0.6258	0.6203	0.6622	0.5008	0.9588	0.892	0.9079	0.778	0.8207	0.8105	0.6599	0.7021	0.7274	0.7161	0.6965	0.7546	0.7371	0.7614	0.7483
20	-63.1313	-63.9431	-64.6498	-62.2766			0.6876	0.6358	0.6289	0.6763	0.5076	0.9892	0.9271	0.9493	0.8258	0.8489	0.8198	0.6719	0.7142	0.7416	0.7302	0.7084	0.7693	0.7532	0.7758	0.7652
21	-63.1411	-63.93	-64.5677	-62.3062			0.699	0.6465	0.6381	0.6841	0.5127	1.0359	0.9582	0.9966	0.8627	0.8726	0.8304	0.6833	0.7266	0.7621	0.7383	0.7248	0.7843	0.766	0.7921	0.7829
22	-63.1378	-63.9103	-64.5414	-62.2799			0.7134	0.6541	0.6461	0.6942	0.5195	1.087	0.9975	1.0343	0.9069	0.8973	0.8421	0.6941	0.7379	0.774	0.7486	0.7434	0.8078	0.7863	0.808	0.7957
23	-63.1641	-63.9168	-64.5447	-62.2865			0.7265	0.6657	0.6568	0.7053	0.5265	1.1322	1.0433	1.0742	0.948	0.9227	0.851	0.7039	0.7509	0.7868	0.7618	0.7567	0.8237	0.8084	0.8304	0.814
24	-63.1017	-63.9497	-64.5578	-62.2635			0.7373	0.6762	0.6662	0.7148	0.5343	1.1752	1.1118	1.1204	0.9782	0.9508	0.8656	0.7179	0.7639	0.8009	0.7755	0.7689	0.8518	0.8292	0.8515	0.8351
25	-63.1576	-63.9892	-64.5545	-62.3391			0.7502	0.6847	0.6741	0.7264	0.5421	1.2362	1.155	1.1549	1.0118	0.9722	0.8767	0.7262	0.7786	0.8128	0.787	0.7835	0.8742	0.8511	0.8691	0.8506
26	-63.0425	-63.953	-64.4921	-62.3128			0.7618	0.6937	0.6854	0.7359	0.5523	1.2845	1.1776	1.1956	1.0451	1.0219	0.8888	0.738	0.798	0.8271	0.8001	0.8043	0.8873	0.8671	0.8928	0.8692
27	-63.0688	-64.0385	-64.5151	-62.3161			0.7713	0.7015	0.6958	0.7449	0.561	1.4533	1.2006	1.3638	1.0996	1.0596	0.9016	0.7519	0.8086	0.8422	0.8126	0.8263	0.9024	0.8865	0.9165	0.8914
28	-63.0261	-64.0845	-64.4822	-62.3457			0.7826	0.7122	0.7048	0.7564	0.5684	1.5312	1.2343	1.4002	1.1665	1.0952	0.9148	0.763	0.8195	0.854	0.8252	0.842	0.9278	0.9028	0.9406	0.913
29	-63.0852	-64.0976	-64.5019	-62.3292			0.7919	0.7214	0.7151	0.7665	0.5793		1.2703	1.45	1.2629	1.1326	0.9304	0.7728	0.8307	0.8635	0.8401	0.8712	0.9453	0.921	0.9585	0.9428
30	-63.0589	-64.1535	-64.4954	-62.3424			0.8013	0.7307	0.7252	0.7795	0.5886		1.3053	1.5285	1.3332	1.175	0.9443	0.786	0.8429	0.8751	0.8576	0.887	0.9645	0.9376	0.9899	0.9693
31	-63.0031	-64.1667	-64.4263	-62.3785			0.8117	0.7375	0.7374	0.7886	0.5953		1.3496	1.5989	1.3694	1.2148	0.96	0.7993	0.8533	0.8866	0.8702	0.902	0.9873	0.9724	1.0193	0.9835
32	-63.0031	-64.1798	-64.4329	-62.4114			0.8223	0.7461	0.7445	0.8015	0.6029		1.3947	1.6531	1.4525	1.2624	0.9717	0.8084	0.8659	0.8994	0.883	0.9186	1.0068	0.9954	1.0437	1.01
33	-63.0589	-64.2751	-64.4822	-62.3621			0.8343	0.7571	0.7554	0.8125	0.6126		1.4796		1.6274	1.2951	0.9924	0.8196	0.8794	0.9164	0.8978	0.9414	1.0269	1.0109	1.0726	1.0379
34	-62.9702	-64.216	-64.5348	-62.3785			0.8446	0.7675	0.7658	0.8232	0.6224		1.5377			1.3416	1.0077	0.834	0.895	0.9369	0.9072	0.9638	1.0534	1.0292	1.1051	1.0678
35	-62.9373	-64.2192	-64.4822	-62.4213			0.8573	0.7799	0.7762	0.8362	0.6292		1.6124			1.4245	1.0251	0.8484	0.9072	0.9507	0.9171	0.984	1.079	1.05	1.1243	1.089
36	-62.8223	-64.2685	-64.5118	-62.4476			0.8731	0.788	0.7876	0.8452	0.6391		1.6748			1.4736	1.0385	0.8591	0.9217	0.9621	0.9299	1.0005	1.1077	1.0719	1.1449	1.118
37	-62.888	-64.239	-64.4428	-62.4574			0.8851	0.7983	0.8003	0.8557	0.6473					1.562	1.0563	0.8706	0.9322	0.9764	0.9421	1.0254	1.1368	1.089	1.1611	1.1462
38	-62.8584	-64.3113	-64.4592	-62.4278			0.898	0.8096	0.8119	0.8671	0.655					1.6453	1.0744	0.8817	0.9475	0.9935	0.9534	1.0468	1.1571	1.1063	1.1845	1.1674
39	-62.819	-64.2981	-64.5216	-62.4541			0.9098	0.82	0.8216	0.8793	0.6651					1.7457	1.0921	0.8953	0.9578	1.0076	0.9667	1.0777	1.1816	1.1405	1.2086	1.2063
40	-62.8387	-64.2817	-64.4625	-62.4541			0.9189	0.8284	0.832	0.8887	0.6753					2.1351	1.1071	0.9103	0.9701	1.0238	0.9856	1.1042	1.2039	1.1823	1.232	1.2382
41	-62.8289	-64.3179	-64.4099	-62.5462			0.9318	0.8404	0.841	0.9047	0.6858					2.2199	1.1197	0.9214	0.9857	1.0393	1.0028	1.1278	1.2255	1.202	1.2517	1.2588
42	-62.7565	-64.3902	-64.423	-62.6152			0.9407	0.8487	0.8531	0.9161	0.6949					2.2621	1.1343	0.9317	0.9964	1.0518	1.0147	1.1591	1.2514	1.2325	1.2747	1.3185
43	-62.704	-64.4033	-64.571	-62.6053			0.9559	0.8605	0.8629	0.9292	0.7056						1.1497	0.9456	1.0119	1.0683	1.0296	1.1877	1.2776	1.2549	1.2984	1.3598
44	-62.6809	-64.4625	-64.5512	-62.6053			0.9681	0.8751	0.877	0.9414	0.7165						1.1655	0.9561	1.0275	1.0834	1.048	1.2187	1.2928	1.2803	1.32	1.4271
45	-62.7927	-64.5151	-64.5381	-62.6283			0.9819	0.8886	0.8868	0.9508	0.7267						1.1807	0.9667	1.0425	1.1083	1.061	1.2513	1.3194	1.3093	1.3366	1.4585
46	-62.6711	-64.6071	-64.5578	-62.6251			0.9958	0.8978	0.9009	0.9615	0.7341						1.1941	0.9783	1.063	1.125	1.0744	1.2696	1.3402	1.3363	1.3608	1.5109
47	-62.704	-64.5742	-64.5151	-62.6809			1.0093	0.9108	0.9129	0.9731	0.7429						1.2139	0.9969	1.0806	1.1461	1.0949	1.2933	1.3611	1.3669	1.3899	1.5386
48	-62.6941	-64.594	-64.5907	-62.7105			1.0245	0.925	0.9232	0.9855	0.7534						1.2359	1.0121	1.0957	1.1648	1.1145	1.3197	1.3802	1.3969	1.4256	1.5748
49	-62.7237	-64.5578	-64.5644	-62.6908			1.0392	0.9386	0.9331	0.9975	0.7622						1.2546	1.0273	1.1155	1.1813	1.1334	1.3559	1.4014	1.4361	1.4602
50	-62.6448	-64.5907	-64.5742	-62.7204			1.0497	0.9533	0.9435	1.0088	0.7746						1.2747	1.0414	1.1309	1.202	1.1495	1.3888	1.4315	1.4715	1.4876
51	-62.7007	-64.64	-64.5907	-62.704			1.063	0.9619	0.9556	1.0209	0.7828						1.2917	1.0548	1.1491	1.2164	1.1647	1.4042	1.4636	1.5086	1.5178
52	-62.6481	-64.6827	-64.5808	-62.7565			1.0733	0.9709	0.9698	1.0332	0.7911						1.3177	1.0685	1.1647	1.2351	1.185	1.4256	1.4966	1.544	1.5724
53	-62.727	-64.6498	-64.4658	-62.7861			1.0865	0.9836	0.9834	1.0428	0.7998						1.337	1.0814	1.1804	1.2531	1.2069	1.4486	1.5316	1.5676	1.6238
54	-62.7204	-64.6235	-64.4723	-62.7993			1.0998	0.9965	0.998	1.0557	0.8101						1.3557	1.0924	1.1971	1.2744	1.2272	1.4909	1.5564
55	-62.7072	-64.6104	-64.4691	-62.7565			1.1145	1.0058	1.011	1.0673	0.821						1.3723	1.1072	1.209	1.3023	1.245	1.5176	1.6074
56	-62.7664	-64.6466	-64.4954	-62.704			1.1258	1.0178	1.0222	1.0772	0.8312						1.3884	1.1245	1.2242	1.3239	1.2692	1.5547	2.2477
57	-62.7565	-64.7057	-64.4822	-62.7302			1.1371	1.0315	1.0335	1.0877	0.8411						1.4067	1.1386	1.2426	1.3438	1.281	1.5883
58	-62.7335	-64.6334	-64.5019	-62.7565			1.1483	1.0411	1.0419	1.0986	0.8491						1.4279	1.1563	1.2584	1.3596	1.2955	2.2488
59	-62.7467	-64.7222	-64.5019	-62.7796			1.161	1.0525	1.0506	1.1105	0.8615						1.4492	1.1735	1.2748	1.3756	1.3122	2.2762
60	-62.8223	-64.6761	-64.5184	-62.7763			1.1734	1.0632	1.0621	1.1214	0.8722						1.4668	1.1878	1.2867	1.3905	1.326	2.2925
61	-62.8256	-64.6663	-64.4723	-62.7894			1.1842	1.0764	1.0747	1.1338	0.8841						1.4857	1.2015	1.3036	1.4088	1.3388
62	-62.819	-64.6564	-64.5019	-62.7993			1.1978	1.0871	1.0877	1.1453	0.8921						1.5093	1.2292	1.3252	1.4264	1.3552
63	-62.7565	-64.663	-64.5282	-62.888			1.2096	1.0967	1.0984	1.1606	0.9011						1.5331	1.25	1.341	1.4484	1.3729
64	-62.8289	-64.6367	-64.5085	-62.934			1.225	1.1078	1.1079	1.1714	0.9143						1.5468	1.2726	1.359	1.4708	1.3878
65	-62.9242	-64.6433	-64.4855	-62.8979			1.2369	1.1195	1.1195	1.1828	0.9237						1.5784	1.2966	1.3772	1.4986	1.4062
66	-62.8847	-64.6893	-64.4461	-62.8782			1.248	1.1318	1.1326	1.196	0.9342						1.6037	1.3148	1.4036	1.5184	1.4263
67	-62.8617	-64.6498	-64.4461	-62.9143			1.2622	1.1421	1.1431	1.2066	0.9456						1.6746	1.3309	1.4203	1.539	1.4445
68	-62.8519	-64.6597	-64.4888	-62.9045			1.2753	1.1569	1.1563	1.2203	0.9549							1.3479	1.4316	1.564	1.4588
69	-62.8584	-64.6531	-64.4888	-62.8749			1.2915	1.1701	1.1685	1.2365	0.9648							1.3672	1.4492	1.5932	1.483
70	-62.8091	-64.64	-64.3737	-62.8354			1.3041	1.1813	1.1839	1.2498	0.9761							1.3851	1.4635	1.6288	1.5027
71	-62.7631	-64.755	-64.4296	-62.8979			1.3211	1.1939	1.1964	1.261	0.988							1.4007	1.4773	1.6687	1.5221
72	-62.8256	-64.6893	-64.4	-62.888			1.3331	1.2044	1.2092	1.2792	0.9991							1.4251	1.4953	2.1717	1.5423
73	-62.8486	-64.64	-64.4855	-62.8847			1.3486	1.2194	1.226	1.294	1.0071							1.4444	1.5116	2.2095	1.5596
74	-62.8486	-64.7254	-64.4428	-62.8617			1.3584	1.2306	1.2372	1.3097	1.0194							1.4597	1.5383	2.235	1.5743
75	-62.8847	-64.7583	-64.4165	-62.8486			1.3716	1.239	1.2497	1.3227	1.0307							1.4741	1.5591	2.2574	1.5889
76	-62.8387	-64.6728	-64.5019	-62.9176			1.3869	1.2508	1.265	1.336	1.0405							1.4939	1.5837	2.2921	1.6223
77	-62.8059	-64.732	-64.4921	-62.8321			1.4036	1.2634	1.2761	1.3509	1.0486							1.5178	1.6006		1.6571
78	-62.8256	-64.6991	-64.5052	-62.8354			1.4159	1.2772	1.2904	1.3644	1.0576							1.5428	1.6226		1.712
79	-62.8256	-64.7386	-64.4888	-62.888			1.4295	1.289	1.3032	1.3786	1.0703							1.571	1.6786		1.8386
80	-62.7434	-64.7156	-64.4789	-62.8683			1.4438	1.3019	1.3158	1.3897	1.0839							1.5876			1.9211
81	-62.7927	-64.7156	-64.4198	-62.9768			1.4549	1.3108	1.3294	1.4034	1.0976							1.6068
82	-62.7467	-64.7222	-64.4658	-62.9702			1.4701	1.3205	1.3428	1.4162	1.1107							1.6372
83	-62.7894	-64.6991	-64.3935	-62.9538			1.4805	1.3309	1.3597	1.4265	1.1213							1.7438
84	-62.7927	-64.6991	-64.331	-62.9439			1.493	1.3435	1.3715	1.4384	1.1305							2.1528
85	-62.865	-64.7517	-64.3244	-62.9308			1.5057	1.3567	1.3859	1.4533	1.1451							2.1779
86	-62.8091	-64.7353	-64.4395	-63.0064			1.5218	1.3697	1.4015	1.467	1.1541							2.2019
87	-62.8617	-64.7682	-64.3869	-62.9538			1.5421	1.3814	1.4166	1.4786	1.1648							2.224
88	-62.8157	-64.7123	-64.331	-62.9538			1.5657	1.3938	1.4311	1.491	1.1839							2.2487
89	-62.8683	-64.7287	-64.2981	-62.9932			1.5837	1.4059	1.4451	1.5036	1.2038							2.274
90	-62.8256	-64.7484	-64.2127	-63.0064			1.5994	1.4227	1.4611	1.5218	1.2164
91	-62.9077	-64.7254	-64.2225	-63.0852			1.6138	1.4365	1.4786	1.54	1.2359
92	-62.9012	-64.7287	-64.2094	-63.0885			1.6323	1.457	1.4921	1.5591	1.2477
93	-62.8617	-64.7353	-64.2422	-63.151			1.6562	1.4739	1.5084	1.5796	1.2609
94	-62.865	-64.7682	-64.2028	-63.1115			1.6752	1.4914	1.5218	1.596	1.2758
95	-62.8847	-64.7353	-64.1404	-63.0852			1.6979	1.5015	1.5414	1.6128	1.2891
96	-62.8749	-64.7747	-64.2028	-63.0721			1.7503	1.5153	1.5615	1.6338	1.3005
97	-62.9242	-64.7715	-64.1272	-63.1214			1.7807	1.5297	1.5782	1.6549	1.3137
98	-62.8486	-64.7945	-64.1239	-63.1082			1.8328	1.5466	1.6022	1.6833	1.3265
99	-62.8289	-64.7715	-64.1535	-63.0787			2.2102	1.564	1.6263	1.7125	1.3394
100	-62.8453	-64.8339	-64.1765	-63.0064			2.2627	1.5904	1.6514	1.7742	1.3511
101	-62.8782	-64.7484	-64.1831	-63.0655			2.2824	1.62	1.685	1.8362	1.3628
102	-62.9012	-64.8438	-64.1732	-63.0852				1.6445	1.7283		1.3726
103	-62.9406	-64.7879	-64.2028	-63.1313				1.6831	1.8016		1.3882
104	-62.8519	-64.8175	-64.1239	-63.0622				1.7297	2.2796		1.4018
105	-62.911	-64.8471	-64.1502	-63.0918				1.7564			1.4153
106	-62.8486	-64.8339	-64.1371	-63.0852				1.8175			1.4304
107	-62.7927	-64.8142	-64.0845	-63.0524				1.8558			1.4443
108	-62.8026	-64.7747	-64.0812	-63.0655				1.9155			1.4577
109	-62.7237	-64.7649	-64.1173	-63.1411				2.0006			1.4669
110	-62.7105	-64.7616	-64.1173	-63.1411							1.4853
111	-62.6415	-64.6761	-64.1239	-63.0885							1.4959
112	-62.6251	-64.6827	-64.0845	-63.1082							1.5081
113	-62.6415	-64.7484	-64.1239	-63.0392							1.524
114	-62.5593	-64.7419	-64.1173	-63.0425							1.5395
115	-62.6021	-64.6991	-64.1535	-63.0524							1.5559
116	-62.464	-64.7616	-64.2225	-62.9899							1.5717
117	-62.5297	-64.6991	-64.2587	-63.0688							1.5879
118	-62.4772	-64.6893	-64.2094	-63.1017							1.6026
119	-62.3687	-64.7583	-64.1897	-63.0064							1.6258
120	-62.4213	-64.7254	-64.2554	-63.0655							1.6506
121	-62.3555	-64.7222	-64.1601	-63.0392							1.6822
122	-62.3095	-64.7419	-64.2094	-63.0787							1.7225
123	-62.3391	-64.7813	-64.2094	-63.1115							1.7529
124	-62.3161	-64.8306	-64.1864	-63.082							1.8052
125	-62.3325	-64.8734	-64.2554	-63.105							1.8589
126	-62.3588	-64.8536	-64.2916	-63.0655							2.2914
127	-62.2997	-64.7912	-64.308	-63.1017
128	-62.3095	-64.8964	-64.3737	-63.0984
129	-62.2504	-64.8931	-64.4099	-63.1411
130	-62.2175	-64.9161	-64.3902	-63.151
131	-62.2273	-64.9292	-64.3737	-63.128
132	-62.201	-64.9095	-64.423	-63.0294
133	-62.2076	-64.9029	-64.4723	-63.0326
134	-62.178	-64.9194	-64.4461	-63.0425
135	-62.2372	-64.9621	-64.4986	-63.0425
136	-62.1945	-64.9227	-64.5052	-63.0458
137	-62.1353	-64.9654	-64.3836	-63.0622
138	-62.1649	-64.9555	-64.5414	-63.1148
139	-62.1715	-64.9325	-64.4822	-63.0754
140	-62.0991	-65.0476	-64.5052	-63.0359
141	-62.1386	-64.9851	-64.5052	-63.0524
142	-62.1156	-65.0081	-64.5282	-63.0129
143	-62.0696	-64.9785	-64.4428	-63.0589
144	-62.155	-65.0114	-64.4921	-63.0425
145	-62.04	-64.9161	-64.5249	-62.9965
146	-62.0038	-64.8503	-64.4198	-63.0031
147	-62.063	-64.9062	-64.4329	-63.0326
148	-62.0663	-64.8865	-64.4723	-62.9702
149	-62.0334	-64.8043	-64.4066	-62.9866
150	-61.9973	-64.7715	-64.4198	-62.9899
151	-61.9841	-64.8569	-64.4789	-63.0261
152	-61.9677	-64.709	-64.5479	-63.0294
153	-61.971	-64.663	-64.5348	-63.0688
154	-61.9677	-64.6696	-64.5118	-62.9965
155	-62.0071	-64.5808	-64.5447	-63.0261
156	-61.9808	-64.5545	-64.594	-63.0228
157	-62.0466	-64.5973	-64.6268	-62.9801
158	-62.1287	-64.4921	-64.5249	-63.0162
159	-62.1452	-64.4296	-64.594	-63.0064
160	-62.1057	-64.4362	-64.6761	-63.0392
161	-62.1419	-64.4921	-64.6466	-63.0721
162	-62.1452	-64.4329	-64.6597	-63.1477
163	-62.155	-64.4	-64.6498	-63.0589
164	-62.1715	-64.4428	-64.755	-63.0655
165	-62.2175	-64.4099	-64.7616	-63.1181
166	-62.2175	-64.3244	-64.8208	-63.0557
167	-62.2865	-64.2916	-64.8109	-63.1378
168	-62.3128	-64.2554	-64.8799	-63.0951
169	-62.3687	-64.2554	-64.9095	-63.1444
170	-62.3358	-64.2521	-64.8602	-63.1411
171	-62.3424	-64.1732	-64.9128	-63.1345
172	-62.3621	-64.2258	-64.9785	-63.1181
173	-62.4607	-64.1239	-65.0015	-63.1543
174	-62.5133	-64.1305	-65.0673	-63.1543
175	-62.5363	-64.1469	-65.0541	-63.2101
176	-62.5396	-64.0943	-65.0771	-63.2003
177	-62.6152	-64.0385	-65.0673	-63.2069
178	-62.5889	-64.0122	-65.1889	-63.2332
179	-62.5396	-63.953	-65.1758	-63.2101
180	-62.5265	-63.9004	-65.156	-63.1707
181	-62.5002	-63.9267	-65.2283	-63.2364
182	-62.5593	-63.9793	-65.1429	-63.2299
183	-62.5297	-63.9957	-65.1922	-63.2332
184	-62.4837	-63.9431	-65.1396	-63.1904
185	-62.5166	-63.8741	-65.1626	-63.174
186	-62.5232	-63.8807	-65.1429	-63.2036
187	-62.5232	-63.8544	-65.1429	-63.1576
188	-62.5593	-63.838	-65.1199	-63.2003
189	-62.5823	-63.7919	-65.133	-63.2397
190	-62.5725	-63.7722	-65.1856	-63.2496
191	-62.5593	-63.7558	-65.2415	-63.1871
192	-62.51	-63.7788	-65.2185	-63.2101
193	-62.4936	-63.7689	-65.2875	-63.2397
194	-62.5166	-63.8544	-65.2316	-63.151
195	-62.5232	-63.8018	-65.327	-63.243
196	-62.4903	-63.7525	-65.2711	-63.2003
197	-62.5002	-63.7788	-65.2612	-63.1839
198	-62.418	-63.7624	-65.2711	-63.243
199	-62.4607	-63.6868	-65.2251	-63.243
200	-62.5199	-63.6375	-65.2842	-63.312
201	-62.4377	-63.6506	-65.2251	-63.2397
202	-62.4673	-63.6375	-65.3007	-63.3285
203	-62.4377	-63.5816	-65.2776	-63.3449
204	-62.5002	-63.5487	-65.2349	-63.2923
205	-62.4377	-63.6177	-65.2251	-63.3383
206	-62.4278	-63.5487	-65.202	-63.266
207	-62.3917	-63.5816	-65.2415	-63.3351
208	-62.3654	-63.5651	-65.2842	-63.3581
209	-62.3161	-63.4567	-65.3105	-63.3844
210	-62.3095	-63.5125	-65.2711	-63.3285
211	-62.2734	-63.5684	-65.2349	-63.3613
212	-62.1682	-63.6276	-65.1758	-63.3186
213	-62.2405	-63.5947	-65.2481	-63.3219
214	-62.1879	-63.5783	-65.1462	-63.4106
215	-62.1649	-63.5224	-65.1856	-63.2956
216	-62.1353	-63.4665	-65.1626	-63.3646
217	-62.1419	-63.5191	-65.133	-63.3416
218	-62.1123	-63.4895	-65.1823	-63.2792
219	-62.201	-63.4797	-65.1593	-63.2989
220	-62.1682	-63.46	-65.1429	-63.3088
221	-62.1813	-63.4797	-65.2152	-63.2364
222	-62.132	-63.4501	-65.1133	-63.2332
223	-62.1353	-63.4501	-65.087	-63.2989
224	-62.0663	-63.4074	-65.0771	-63.2266
225	-62.0564	-63.3778	-65.1133	-63.2003
226	-62.1485	-63.3219	-65.0771	-63.1411
227	-62.0794	-63.3581	-65.1002	-63.2562
228	-62.0597	-63.4074	-65.0508	-63.2857
229	-62.0498	-63.3778	-65.0969	-63.3482
230	-62.0597	-63.4139	-65.1199	-63.243
231	-62.0466	-63.3186	-65.1166	-63.289
232	-62.04	-63.312	-65.0739	-63.3252
233	-62.017	-63.3909	-65.0344	-63.3515
234	-62.0268	-63.3975	-65.0903	-63.3219
235	-62.0005	-63.4106	-65.0936	-63.4139
236	-61.9611	-63.3876	-65.0443	-63.4797
237	-62.0104	-63.3811	-65.0278	-63.4468
238	-61.8855	-63.3416	-65.0476	-63.4271
239	-61.9249	-63.3088	-65.0048	-63.3778
240	-61.8789	-63.3581	-64.995	-63.3975
241	-61.9151	-63.3548	-64.972	-63.4139
242	-61.9184	-63.3318	-64.9687	-63.3745
243	-61.9217	-63.266	-64.9358	-63.4928
244	-61.8329	-63.2956	-64.972	-63.5257
245	-61.8756	-63.2233	-65.0081	-63.5454
246	-61.8986	-63.2266	-64.9884	-63.5421
247	-61.823	-63.1707	-64.9161	-63.4994
248	-61.8362	-63.2003	-64.8865	-63.5027
249	-61.8559	-63.2299	-64.8701	-63.4665
250	-61.8198	-63.2036	-64.8142	-63.4961
251	-61.8954	-63.2266	-64.8471	-63.4994
252	-61.823	-63.197	-64.7747	-63.5191
253	-61.8362	-63.1871	-64.7616	-63.5125
254	-61.8559	-63.2003	-64.7287	-63.4961
255	-61.8329	-63.174	-64.7649	-63.5454
256	-61.7507	-63.1082	-64.7945	-63.529
257	-61.7869	-63.1576	-64.8142	-63.4337
258	-61.7573	-63.1543	-64.7682	-63.46
259	-61.7606	-63.1148	-64.7353	-63.5323
260	-61.8099	-63.1247	-64.7517	-63.4501
261	-61.7869	-63.0688	-64.7813	-63.5849
262	-61.7343	-63.128	-64.801	-63.5783
263	-61.7935	-63.0392	-64.7747	-63.5421
264	-61.7474	-63.0392	-64.7517	-63.5914
265	-61.6981	-62.9538	-64.7517	-63.6177
266	-61.7211	-62.9406	-64.7386	-63.5619
267	-61.754	-62.8979	-64.8471	-63.552
268	-61.7277	-62.9242	-64.8043	-63.598
269	-61.7442	-62.9012	-64.8536	-63.6046
270	-61.7211	-62.9308	-64.8471	-63.6342
271	-61.7211	-62.8814	-64.8438	-63.6506
272	-61.7343	-62.9045	-64.8602	-63.6605
273	-61.7113	-62.8782	-64.8241	-63.6112
274	-61.7705	-62.9176	-64.9161	-63.6835
275	-61.7869	-62.9538	-64.8964	-63.5947
276	-61.7672	-62.9143	-64.8766	-63.6375
277	-61.7507	-62.8749	-64.8766	-63.6703
278	-61.7836	-62.8059	-64.9588	-63.6506
279	-61.731	-62.8617	-64.9457	-63.7722
280	-61.6751	-62.9406	-64.8471	-63.7591
281	-61.731	-62.9538	-64.8503	-63.7262
282	-61.731	-62.8716	-64.8668	-63.6933
283	-61.6521	-62.8453	-64.8898	-63.7393
284	-61.662	-62.8354	-64.8405	-63.7656
285	-61.6916	-62.911	-64.8536	-63.7196
286	-61.6258	-62.773	-64.8405	-63.7821
287	-61.6423	-62.7828	-64.8766	-63.7887
288	-61.685	-62.8124	-64.9062	-63.7722
289	-61.6718	-62.819	-64.949	-63.838
290	-61.7179	-62.7993	-64.8471	-63.8281
291	-61.7409	-62.8453	-64.9259	-63.8281
292	-61.731	-62.842	-64.9194	-63.8084
293	-61.7672	-62.8289	-64.9358	-63.884
294	-61.6817	-62.8519	-64.9292	-63.9168
295	-61.6981	-62.8946	-64.9621	-63.9201
296	-61.6817	-62.8552	-64.9391	-63.9366
297	-61.6981	-62.8716	-64.9785	-63.9168
298	-61.7442	-62.8847	-64.9884	-63.9859
299	-61.7179	-62.9143	-64.9391	-63.9333
300	-61.7244	-62.8157	-64.9588	-63.9431
301	-61.823	-62.8223	-64.9621	-63.9366
302	-61.8132	-62.8026	-64.9983	-64.0122
303	-61.7737	-62.865	-65.0443	-64.0483
304	-61.7474	-62.8256	-65.0574	-64.0089
305	-61.7967	-62.8552	-65.1034	-64.0582
306	-61.754	-62.8256	-65.0969	-64.0187
307	-61.8033	-62.8289	-65.0311	-64.0483
308	-61.7803	-62.8683	-65.0311	-64.0845
309	-61.7277	-62.9603	-65.0541	-64.1962
310	-61.8033	-62.8782	-65.0541	-64.1305
311	-61.8888	-62.911	-65.0607	-64.0911
312	-61.9019	-62.9143	-65.0048	-64.1404
313	-61.8592	-62.9439	-65.041	-64.2094
314	-61.9085	-63.0359	-64.995	-64.2521
315	-61.8033	-62.9439	-64.9884	-64.1272
316	-61.823	-62.9242	-65.0936	-64.1765
317	-61.8921	-62.934	-65.1593	-64.1436
318	-61.9447	-62.9965	-65.1823	-64.1568
319	-61.8592	-62.9505	-65.1889	-64.1897
320	-61.9151	-62.9472	-65.2678	-64.1634
321	-61.9512	-62.8617	-65.1922	-64.2521
322	-62.0038	-62.9768	-65.2185	-64.2324
323	-61.8888	-62.9833	-65.1758	-64.1929
324	-61.8986	-62.9472	-65.202	-64.1535
325	-61.9052	-62.9373	-65.2546	-64.1699
326	-62.0005	-62.8617	-65.2448	-64.2061
327	-61.9841	-62.9308	-65.2448	-64.1601
328	-62.0597	-62.8946	-65.1988	-64.1732
329	-62.0334	-62.9308	-65.1462	-64.1962
330	-62.1123	-62.911	-65.1823	-64.1765
331	-62.1287	-62.865	-65.1462	-64.2225
332	-62.0531	-62.888	-65.1692	-64.2554
333	-62.1024	-62.8814	-65.1429	-64.2127
334	-62.2043	-62.9176	-65.2152	-64.1765
335	-62.1846	-62.888	-65.1527	-64.2521
336	-62.1485	-62.9439	-65.133	-64.2291
337	-62.1254	-62.8387	-65.1297	-64.2094
338	-62.1189	-62.8814	-65.2086	-64.2291
339	-62.1386	-62.9012	-65.156	-64.1535
340	-62.1649	-62.9275	-65.1758	-64.1798
341	-62.1682	-62.8979	-65.0706	-64.1239
342	-62.1912	-62.9242	-65.0246	-64.1173
343	-62.1287	-62.9373	-64.9884	-64.068
344	-62.109	-62.9406	-65.0213	-64.1206
345	-62.1748	-62.8979	-64.9391	-64.1042
346	-62.2208	-62.8847	-64.9194	-64.1042
347	-62.1715	-62.9143	-64.9292	-64.0549
348	-62.178	-62.9373	-64.995	-64.1042
349	-62.1682	-62.8946	-64.9457	-64.0385
350	-62.2208	-62.8814	-64.9128	-64.0943
351	-62.1813	-62.9077	-64.9194	-64.1141
352	-62.2471	-62.8683	-64.9522	-64.1798
353	-62.3391	-62.9209	-64.9194	-64.2061
354	-62.2865	-62.8913	-64.8471	-64.2357
355	-62.3161	-62.8584	-64.8898	-64.2291
356	-62.349	-62.8814	-64.8865	-64.2258
357	-62.3588	-62.911	-64.8964	-64.262
358	-62.3391	-62.8354	-64.9029	-64.1995
359	-62.3522	-62.8486	-64.9753	-64.2784
360	-62.4344	-62.8617	-64.9457	-64.2422
361	-62.418	-62.8716	-64.9161	-64.1667
362	-62.4706	-62.865	-64.8766	-64.2028
363	-62.4574	-62.7927	-64.8799	-64.285
364	-62.4673	-62.911	-64.8175	-64.2488
365	-62.487	-62.9768	-64.8799	-64.1798
366	-62.5462	-62.934	-64.8734	-64.1929
367	-62.5593	-62.9012	-64.8799	-64.1864
368	-62.5396	-62.9143	-64.9161	-64.2094
369	-62.5528	-62.8946	-64.8832	-64.2455
370	-62.5758	-62.7763	-64.9194	-64.2094
371	-62.6546	-62.888	-64.9424	-64.2455
372	-62.6678	-62.9571	-64.8832	-64.2521
373	-62.7105	-62.8584	-64.8997	-64.1864
374	-62.6645	-62.9439	-64.9424	-64.1831
375	-62.6382	-62.9439	-64.9259	-64.1568
376	-62.7204	-62.9833	-64.9259	-64.1897
377	-62.7697	-62.9406	-64.9818	-64.1667
378	-62.8486	-62.9308	-64.8997	-64.1568
379	-62.8814	-62.9077	-64.8668	-64.1371
380	-62.865	-62.9472	-64.9259	-64.1929
381	-62.865	-62.9472	-64.8898	-64.2094
382	-62.9012	-62.8979	-64.8569	-64.1042
383	-62.9012	-62.8026	-64.8668	-64.1535
384	-62.9735	-62.8716	-64.8602	-64.1995
385	-62.9636	-62.9242	-64.8865	-64.1469
386	-62.9899	-62.9012	-64.9128	-64.0976
387	-63.0425	-62.842	-64.9128	-64.1239
388	-63.0458	-62.8059	-64.9259	-64.1206
389	-63.0918	-62.773	-64.9029	-64.0812
390	-63.0622	-62.8354	-64.8602	-64.1338
391	-63.0359	-62.8321	-64.8734	-64.1929
392	-63.0326	-62.8256	-64.9161	-64.1469
393	-63.0622	-62.8946	-64.8536	-64.1732
394	-63.0721	-62.8584	-64.8865	-64.2094
395	-63.0458	-62.8979	-64.8569	-64.2521
396	-63.1214	-62.888	-64.8306	-64.2324
397	-63.082	-62.865	-64.9128	-64.239
398	-63.1904	-62.9472	-64.9424	-64.2488
399	-63.1345	-62.9538	-64.9654	-64.2554
400	-63.1543	-63.0852	-64.9687	-64.2455
401	-63.1477	-63.0458	-64.9325	-64.308
402	-63.105	-63.1444	-64.9029	-64.354
403	-63.1345	-63.1444	-64.8865	-64.3211
404	-63.1115	-63.1247	-64.9095	-64.3639
405	-63.0852	-63.1082	-64.9917	-64.262
406	-63.151	-63.1017	-64.9227	-64.2455
407	-63.1247	-63.0491	-64.9095	-64.308
408	-63.174	-63.1148	-64.9227	-64.2653
409	-63.2101	-63.1181	-64.972	-64.2784
410	-63.1904	-63.1773	-64.9358	-64.2357
411	-63.2364	-63.0754	-64.9983	-64.3376
412	-63.2134	-63.0458	-64.9818	-64.3146
413	-63.2233	-63.105	-64.8701	-64.3442
414	-63.2364	-63.105	-64.9325	-64.3113
415	-63.1904	-63.0787	-64.9029	-64.331
416	-63.1345	-63.0852	-64.9358	-64.239
417	-63.1937	-63.082	-64.9753	-64.2653
418	-63.2562	-63.0721	-64.9358	-64.2948
419	-63.2956	-63.0261	-64.9917	-64.262
420	-63.2956	-63.0721	-65.0015	-64.2751
421	-63.2956	-63.0918	-65.0936	-64.2751
422	-63.3515	-63.0326	-65.0377	-64.2718
423	-63.3515	-63.0261	-64.9522	-64.2685
424	-63.3416	-63.082	-64.949	-64.3146
425	-63.2923	-63.1017	-65.0213	-64.2718
426	-63.3416	-63.1017	-64.9259	-64.2883
427	-63.2857	-63.0852	-64.949	-64.2784
428	-63.2003	-63.1773	-64.9128	-64.3211
429	-63.2397	-63.1641	-64.9128	-64.2357
430	-63.2594	-63.1345	-64.8471	-64.3244
431	-63.2233	-63.1181	-64.9029	-64.3409
432	-63.2759	-63.1937	-64.9128	-64.3869
433	-63.2101	-63.22	-64.9095	-64.3902
434	-63.2397	-63.174	-64.8536	-64.4395
435	-63.2036	-63.2069	-64.8832	-64.4362
436	-63.3515	-63.1806	-64.9227	-64.4395
437	-63.2332	-63.128	-64.949	-64.4822
438	-63.2726	-63.1904	-64.8931	-64.5808
439	-63.2562	-63.1839	-64.9358	-64.5512
440	-63.2332	-63.1313	-64.9391	-64.5216
441	-63.2989	-63.0787	-64.9194	-64.5052
442	-63.2627	-63.0754	-64.9884	-64.4789
443	-63.3153	-63.1181	-64.9522	-64.4329
444	-63.2726	-63.1082	-64.9424	-64.4132
445	-63.243	-63.1543	-65.0607	-64.4395
446	-63.22	-63.1543	-65.0443	-64.5348
447	-63.197	-63.1411	-65.11	-64.4428
448	-63.1576	-63.1181	-65.1133	-64.5447
449	-63.1904	-63.0589	-65.0706	-64.5644
450	-63.2364	-63.0918	-65.0706	-64.5808
451	-63.2627	-63.0984	-65.1396	-64.5841
452	-63.3548	-63.0491	-65.0443	-64.594
453	-63.3449	-63.0918	-65.1823	-64.594
454	-63.3416	-62.9801	-65.1593	-64.6433
455	-63.3844	-63.0064	-65.0837	-64.6761
456	-63.4139	-62.9768	-65.0739	-64.709
457	-63.4041	-62.9669	-65.0936	-64.6794
458	-63.3646	-62.9538	-65.1166	-64.6663
459	-63.4139	-62.934	-65.0541	-64.6926
460	-63.4895	-62.9866	-65.0541	-64.6926
461	-63.4501	-62.9636	-65.0246	-64.6466
462	-63.3909	-62.8782	-65.1034	-64.6038
463	-63.4895	-63.0096	-65.087	-64.6728
464	-63.5125	-62.8749	-65.0541	-64.6564
465	-63.4567	-62.9538	-65.0147	-64.6268
466	-63.4271	-62.9702	-65.064	-64.64
467	-63.4139	-62.8946	-65.087	-64.6137
468	-63.4205	-62.9538	-65.0739	-64.6203
469	-63.4238	-62.9998	-65.1527	-64.5973
470	-63.4139	-62.9899	-65.1067	-64.5545
471	-63.4139	-63.0557	-65.087	-64.5479
472	-63.4337	-63.0359	-65.0804	-64.5512
473	-63.4797	-63.0129	-65.0344	-64.5414
474	-63.4238	-63.0392	-64.9917	-64.5512
475	-63.4632	-62.9932	-64.972	-64.571
476	-63.4106	-63.0787	-64.9785	-64.5841
477	-63.4106	-63.0622	-64.9555	-64.4986
478	-63.4501	-63.1115	-64.949	-64.4691
479	-63.46	-63.1707	-64.9095	-64.5315
480	-63.4106	-63.1214	-64.9292	-64.4592
481	-63.3942	-63.0655	-64.9292	-64.4329
482	-63.4567	-63.0721	-64.9259	-64.4921
483	-63.4337	-63.0524	-64.9325	-64.4362
484	-63.4731	-62.9538	-64.9687	-64.4165
485	-63.4567	-63.0261	-64.9128	-64.4066
486	-63.4238	-62.9866	-64.9325	-64.4132
487	-63.4369	-62.9045	-64.8799	-64.4033
488	-63.4961	-62.8946	-64.9062	-64.4296
489	-63.4961	-62.8979	-64.9227	-64.4033
490	-63.4139	-62.9833	-64.972	-64.3639
491	-63.3811	-62.9899	-64.9785	-64.4296
492	-63.4337	-63.0425	-65.0213	-64.3639
493	-63.4337	-63.0852	-65.0048	-64.3704
494	-63.4863	-63.0622	-64.9851	-64.3967
495	-63.4567	-63.0754	-64.9621	-64.3902
496	-63.4041	-63.0425	-64.9818	-64.3935
497	-63.3844	-63.0885	-65.0344	-64.4
498	-63.4172	-63.105	-65.0476	-64.331
499	-63.3383	-63.0589	-65.1034	-64.3606
500	-63.4994	-63.0458	-65.0048	-64.3606
501	-63.4139	-63.0754	-64.995	-64.2948
502	-63.3449	-63.0294	-65.0114	-64.331
503	-63.4172	-63.1214	-65.0147	-64.2817
504	-63.4008	-63.105	-65.0377	-64.2784
505	-63.4632	-63.1313	-65.0739	-64.3113
506	-63.4928	-63.0195	-65.0311	-64.3277
507	-63.5224	-63.0721	-65.0706	-64.2751
508	-63.5027	-63.0326	-65.0607	-64.308
509	-63.5191	-63.0852	-65.0771	-64.3014
510	-63.5158	-63.0984	-65.1067	-64.4132
511	-63.4665	-63.1641	-65.2152	-64.3343
512	-63.4961	-63.151	-65.1396	-64.3836
513	-63.5093	-63.1148	-65.2481	-64.3113
514	-63.5093	-63.174	-65.1823	-64.3836
515	-63.4665	-63.1806	-65.1626	-64.2916
516	-63.4731	-63.2299	-65.1363	-64.3146
517	-63.4961	-63.2266	-65.1659	-64.3376
518	-63.5093	-63.1904	-65.1527	-64.2981
519	-63.552	-63.2397	-65.1396	-64.3737
520	-63.5027	-63.2594	-65.1133	-64.3474
521	-63.552	-63.1904	-65.0771	-64.3507
522	-63.4863	-63.2134	-65.0804	-64.3902
523	-63.4402	-63.1148	-65.018	-64.3902
524	-63.4863	-63.1904	-64.9785	-64.3704
525	-63.5093	-63.1707	-64.9753	-64.4033
526	-63.4994	-63.22	-65.0147	-64.3277
527	-63.46	-63.3055	-65.041	-64.423
528	-63.4567	-63.22	-64.9917	-64.4789
529	-63.483	-63.312	-65.0114	-64.4198
530	-63.4731	-63.266	-64.9818	-64.3146
531	-63.5586	-63.2923	-65.0311	-64.3507
532	-63.5914	-63.2036	-65.0443	-64.4033
533	-63.5651	-63.1806	-65.041	-64.3606
534	-63.575	-63.243	-65.0443	-64.4198
535	-63.5093	-63.243	-65.0508	-64.3902
536	-63.5257	-63.2463	-65.0048	-64.3277
537	-63.5421	-63.2759	-65.0508	-64.4099
538	-63.4961	-63.4106	-65.064	-64.4033
539	-63.5356	-63.2693	-65.0443	-64.3836
540	-63.506	-63.2726	-65.0837	-64.4033
541	-63.5125	-63.2562	-65.0837	-64.4329
542	-63.4665	-63.2562	-65.1067	-64.377
543	-63.506	-63.3351	-65.1265	-64.3507
544	-63.5257	-63.312	-65.0706	-64.3902
545	-63.4863	-63.3515	-65.1495	-64.3573
546	-63.4435	-63.3482	-65.1232	-64.3014
547	-63.4402	-63.3351	-65.0706	-64.2883
548	-63.4205	-63.3548	-65.1166	-64.3507
549	-63.5027	-63.3219	-65.2251	-64.3573
550	-63.4764	-63.3219	-65.2218	-64.4066
551	-63.4764	-63.2726	-65.202	-64.3244
552	-63.4205	-63.3055	-65.1593	-64.354
553	-63.4994	-63.2726	-65.2152	-64.3376
554	-63.4797	-63.3055	-65.1955	-64.3146
555	-63.4041	-63.3022	-65.1067	-64.331
556	-63.4961	-63.3351	-65.0246	-64.3606
557	-63.5191	-63.3088	-65.0837	-64.3737
558	-63.4863	-63.3285	-65.0804	-64.3047
559	-63.4731	-63.3975	-65.1462	-64.3113
560	-63.4994	-63.3252	-65.0476	-64.3902
561	-63.5257	-63.3351	-65.1462	-64.3047
562	-63.5191	-63.3581	-65.0508	-64.3606
563	-63.5191	-63.3252	-65.0969	-64.354
564	-63.621	-63.2857	-65.1462	-64.3179
565	-63.6605	-63.3548	-65.1199	-64.3935
566	-63.598	-63.3153	-65.1166	-64.3803
567	-63.5619	-63.2825	-65.0673	-64.3639
568	-63.5816	-63.312	-65.0344	-64.3639
569	-63.5586	-63.3581	-65.0377	-64.3639
570	-63.6506	-63.4205	-65.0114	-64.4691
571	-63.5717	-63.3712	-65.0377	-64.4362
572	-63.6046	-63.3285	-64.9917	-64.4888
573	-63.5586	-63.3318	-64.9391	-64.4395
574	-63.552	-63.3252	-64.9062	-64.4493
575	-63.5257	-63.2956	-64.8964	-64.5249
576	-63.5553	-63.2726	-64.8175	-64.5052
577	-63.5224	-63.2759	-64.8471	-64.3836
578	-63.5717	-63.3318	-64.8635	-64.4263
579	-63.5619	-63.2364	-64.8503	-64.3803
580	-63.5191	-63.2463	-64.8668	-64.4756
581	-63.5421	-63.3745	-64.8668	-64.5085
582	-63.4863	-63.3351	-64.8405	-64.5512
583	-63.5849	-63.3318	-64.9259	-64.5085
584	-63.5125	-63.2923	-64.8931	-64.4559
585	-63.4435	-63.3548	-64.9161	-64.4559
586	-63.4632	-63.3186	-64.8865	-64.4362
587	-63.5224	-63.3811	-64.8536	-64.4263
588	-63.4665	-63.3712	-64.8273	-64.3803
589	-63.4928	-63.3515	-64.8964	-64.3474
590	-63.4665	-63.3942	-64.7747	-64.3836
591	-63.4928	-63.3153	-64.8734	-64.3343
592	-63.4271	-63.4008	-64.8043	-64.3902
593	-63.4304	-63.4139	-64.8503	-64.3507
594	-63.4567	-63.3712	-64.8372	-64.3836
595	-63.3844	-63.3351	-64.8503	-64.3409
596	-63.3679	-63.4534	-64.8142	-64.3737
597	-63.4698	-63.3844	-64.8076	-64.4099
598	-63.4074	-63.4238	-64.8701	-64.4132
599	-63.4468	-63.3679	-64.8306	-64.4329
600	-63.3975	-63.3482	-64.8208	-64.4461
601	-63.3778	-63.3811	-64.7846	-64.4066
602	-63.4271	-63.3613	-64.8339	-64.423
603	-63.3482	-63.3942	-64.8799	-64.4066
604	-63.4369	-63.4369	-64.8766	-64.4329
605	-63.4567	-63.4632	-64.8109	-64.4592
606	-63.4271	-63.4238	-64.7846	-64.4296
607	-63.4304	-63.4501	-64.7978	-64.5578
608	-63.3745	-63.5027	-64.7846	-64.5381
609	-63.4632	-63.46	-64.7386	-64.5479
610	-63.483	-63.4238	-64.7254	-64.5118
611	-63.4402	-63.4501	-64.6893	-64.5808
612	-63.4698	-63.4863	-64.6466	-64.5611
613	-63.4238	-63.46	-64.663	-64.4723
614	-63.4369	-63.4337	-64.7024	-64.4855
615	-63.4369	-63.5388	-64.6893	-64.5348
616	-63.5125	-63.4961	-64.6433	-64.5512
617	-63.5487	-63.4928	-64.6498	-64.6794
618	-63.4994	-63.552	-64.6531	-64.6433
619	-63.4961	-63.5388	-64.686	-64.6794
620	-63.5257	-63.5816	-64.6794	-64.64
621	-63.5421	-63.6079	-64.6827	-64.6498
622	-63.5783	-63.5947	-64.6893	-64.686
623	-63.6144	-63.5586	-64.6991	-64.7287
624	-63.6572	-63.6868	-64.7024	-64.663
625	-63.5717	-63.6966	-64.6334	-64.6991
626	-63.6802	-63.6835	-64.6696	-64.7583
627	-63.6506	-63.6868	-64.6498	-64.778
628	-63.6999	-63.6802	-64.6498	-64.8438
629	-63.6342	-63.6933	-64.6301	-64.8536
630	-63.6309	-63.6835	-64.686	-64.9095
631	-63.6243	-63.6736	-64.6991	-64.9128
632	-63.644	-63.6703	-64.6761	-64.8339
633	-63.7032	-63.6473	-64.7287	-64.7912
634	-63.6506	-63.6638	-64.7879	-64.7813
635	-63.6769	-63.6933	-64.7715	-64.8273
636	-63.7426	-63.6703	-64.8799	-64.8832
637	-63.7689	-63.6112	-64.8372	-64.8668
638	-63.7985	-63.5849	-64.7912	-64.8438
639	-63.8182	-63.6933	-64.7912	-64.8471
640	-63.8018	-63.644	-64.8372	-64.9062
641	-63.7919	-63.6868	-64.8865	-64.8964
642	-63.7262	-63.7098	-64.9062	-64.9588
643	-63.7558	-63.7426	-64.9062	-64.9917
644	-63.7229	-63.6999	-64.9095	-64.9161
645	-63.7295	-63.7163	-64.9161	-64.949
646	-63.5849	-63.7525	-64.9522	-64.9194
647	-63.6605	-63.8018	-64.9029	-64.9292
648	-63.598	-63.7788	-64.9292	-64.8832
649	-63.6112	-63.7558	-64.8931	-64.8997
650	-63.6046	-63.7558	-64.9391	-64.8536
651	-63.6309	-63.7492	-64.9555	-64.8865
652	-63.667	-63.7952	-64.8438	-64.8668
653	-63.6473	-63.8445	-64.8503	-64.8372
654	-63.6802	-63.7919	-64.8997	-64.8898
655	-63.6769	-63.8445	-64.8372	-64.8668
656	-63.5717	-63.8347	-64.8471	-64.9588
657	-63.6572	-63.8314	-64.9062	-64.8997
658	-63.6572	-63.8708	-64.9292	-64.8536
659	-63.6506	-63.8741	-64.9194	-64.8602
660	-63.6013	-63.8905	-64.9161	-64.7945
661	-63.6309	-63.8412	-64.9062	-64.8109
662	-63.6769	-63.8938	-64.9128	-64.8438
663	-63.6079	-63.8807	-64.8832	-64.8964
664	-63.5914	-63.8807	-64.9029	-64.8635
665	-63.6506	-63.9727	-64.9917	-64.8372
666	-63.6539	-63.9563	-64.9062	-64.8602
667	-63.621	-64.0253	-64.9391	-64.8405
668	-63.5684	-63.9727	-65.0114	-64.8043
669	-63.5684	-63.9596	-65.0015	-64.8536
670	-63.552	-63.9037	-65.0213	-64.8405
671	-63.5027	-63.8544	-65.0048	-64.7912
672	-63.5651	-63.9103	-64.9424	-64.8766
673	-63.4468	-63.9629	-65.0508	-64.8569
674	-63.4435	-63.907	-64.9391	-64.9128
675	-63.4172	-63.9662	-64.9391	-64.8536
676	-63.4172	-64.0155	-64.9358	-64.8898
677	-63.4041	-63.9629	-64.8766	-64.9391
678	-63.3811	-64.0319	-64.8997	-64.7682
679	-63.3942	-64.0122	-64.8898	-64.8076
680	-63.312	-64.0319	-64.9292	-64.8241
681	-63.3778	-64.0943	-64.7978	-64.7517
682	-63.3482	-64.0746	-64.8208	-64.7912
683	-63.3844	-63.9563	-64.8043	-64.8175
684	-63.3811	-64.0023	-64.8306	-64.8536
685	-63.3416	-63.9826	-64.8372	-64.8405
686	-63.3679	-63.953	-64.8471	-64.8701
687	-63.4665	-63.9727	-64.8109	-64.8372
688	-63.5651	-63.9464	-64.8471	-64.7912
689	-63.5914	-63.9662	-64.8766	-64.8701
690	-63.5783	-63.953	-64.8076	-64.8964
691	-63.621	-63.9201	-64.8109	-64.8898
692	-63.644	-63.9957	-64.8536	-64.9095
693	-63.5586	-64.0483	-64.8241	-64.9161
694	-63.5914	-64.0253	-64.9161	-64.9588
695	-63.5684	-64.068	-64.8339	-64.9029
696	-63.5651	-64.0549	-64.8536	-64.8602
697	-63.6013	-64.0319	-64.9062	-64.8273
698	-63.5783	-64.0155	-64.9029	-64.8438
699	-63.5684	-64.1108	-64.9555	-64.8339
700	-63.6079	-64.0549	-64.8471	-64.8208
701	-63.6966	-64.0746	-64.7978	-64.8241
702	-63.598	-64.0516	-64.8306	-64.7846
703	-63.6276	-64.0549	-64.8339	-64.8175
704	-63.69	-64.0319	-64.8142	-64.7386
705	-63.644	-64.0746	-64.8306	-64.8306
706	-63.6539	-64.0549	-64.8339	-64.9325
707	-63.6375	-64.0122	-64.9227	-64.8734
708	-63.7032	-64.0582	-64.9588	-64.8273
709	-63.6243	-64.0483	-64.8964	-64.8635
710	-63.5388	-64.0056	-65.0015	-64.8471
711	-63.5717	-64.0023	-65.0114	-64.8536
712	-63.6046	-64.0812	-64.995	-64.778
713	-63.5914	-64.0713	-64.9194	-64.7353
714	-63.5093	-64.0648	-64.8142	-64.7386
715	-63.6144	-64.0911	-64.8306	-64.8306
716	-63.621	-64.0911	-64.9161	-64.8865
717	-63.6342	-64.1141	-64.9095	-64.8405
718	-63.5816	-64.1108	-64.8997	-64.8438
719	-63.6572	-64.1765	-64.8503	-64.8668
720	-63.575	-64.1568	-64.9029	-64.9029
721	-63.644	-64.1305	-64.949	-64.8471
722	-63.6243	-64.1732	-64.9457	-64.8865
723	-63.7065	-64.1962	-64.8931	-65.0048
724	-63.6835	-64.1732	-64.9227	-65.0048
725	-63.69	-64.1634	-64.8503	-64.9851
726	-63.6999	-64.1995	-64.8569	-64.9522
727	-63.6506	-64.2225	-64.8701	-64.9785
728	-63.6868	-64.2422	-64.9062	-64.9851
729	-63.6375	-64.2357	-64.9128	-65.0574
730	-63.6013	-64.3113	-64.949	-65.0443
731	-63.6407	-64.3507	-64.8898	-65.1002
732	-63.6013	-64.3606	-64.9161	-65.1758
733	-63.6506	-64.4362	-64.9358	-65.1429
734	-63.5125	-64.4428	-64.9555	-65.1232
735	-63.5487	-64.4559	-64.9227	-65.0804
736	-63.4994	-64.5085	-64.8799	-65.0837
737	-63.483	-64.5184	-64.8668	-65.0574
738	-63.4304	-64.5118	-64.9621	-65.087
739	-63.4369	-64.5216	-64.9753	-65.0837
740	-63.4534	-64.5775	-64.9654	-65.1659
741	-63.4534	-64.6137	-64.9029	-65.0969
742	-63.46	-64.6433	-64.9884	-65.087
743	-63.4501	-64.5742	-65.0015	-65.1297
744	-63.4895	-64.6268	-65.0048	-65.1495
745	-63.4271	-64.6959	-64.949	-65.0804
746	-63.4501	-64.6466	-64.9391	-65.064
747	-63.4797	-64.7024	-64.9391	-65.0837
748	-63.4369	-64.7254	-64.9785	-65.0739
749	-63.529	-64.7616	-64.9588	-65.11
750	-63.5224	-64.8043	-64.9654	-65.0607
751	-63.5356	-64.7813	-64.9983	-65.0377
752	-63.5783	-64.7846	-65.0377	-64.9917
753	-63.5619	-64.7517	-65.0443	-65.0213
754	-63.6079	-64.8438	-65.0607	-65.0048
755	-63.5849	-64.7813	-65.0837	-65.0246
756	-63.5947	-64.8438	-65.1034	-65.087
757	-63.6013	-64.8734	-65.0936	-65.0804
758	-63.6177	-64.8602	-65.0147	-65.0278
759	-63.6407	-64.8372	-65.0476	-65.0311
760	-63.6506	-64.8241	-65.0344	-64.9983
761	-63.6144	-64.8043	-65.0311	-65.0508
762	-63.6868	-64.7813	-65.0574	-65.0607
763	-63.6605	-64.8175	-65.1166	-65.018
764	-63.7328	-64.8471	-65.1889	-65.0541
765	-63.7722	-64.8241	-65.2283	-65.0508
766	-63.7328	-64.8766	-65.2349	-65.0048
767	-63.7985	-64.8766	-65.2711	-64.9424
768	-63.8018	-64.9654	-65.3007	-64.9259
769	-63.8182	-64.9621	-65.3007	-64.9687
770	-63.8873	-64.9818	-65.3401	-64.9128
771	-63.861	-65.0048	-65.2974	-64.9753
772	-63.9366	-64.9983	-65.2941	-64.8997
773	-63.8445	-64.9325	-65.2579	-64.9062
774	-63.9662	-65.0278	-65.3138	-64.9588
775	-63.8938	-65.0213	-65.2941	-64.9062
776	-63.9629	-65.0147	-65.2612	-64.995
777	-64.0122	-64.9588	-65.2809	-65.018
778	-63.9859	-65.0344	-65.2612	-65.0015
779	-63.976	-65.064	-65.2612	-65.0081
780	-63.9924	-65.0673	-65.2678	-64.9785
781	-64.0319	-64.9884	-65.3138	-65.018
782	-63.9957	-65.0311	-65.3302	-65.0147
783	-64.1173	-65.0706	-65.1856	-65.064
784	-64.1009	-65.0443	-65.2415	-65.0048
785	-64.1075	-65.041	-65.2842	-64.949
786	-64.1141	-65.0443	-65.1265	-65.0048
787	-64.1141	-65.0278	-65.0903	-64.9983
788	-64.0845	-64.9555	-65.0837	-64.949
789	-64.1108	-65.064	-65.041	-64.9358
790	-64.0648	-65.0739	-65.0048	-64.9917
791	-64.0253	-65.0706	-65.0278	-64.9917
792	-64.1831	-65.0804	-65.0147	-64.9621
793	-64.2127	-65.0607	-65.0936	-64.8832
794	-64.1108	-65.1495	-65.1133	-64.9259
795	-64.1634	-65.156	-65.087	-64.8503
796	-64.1699	-65.1265	-65.1725	-64.8273
797	-64.0911	-65.1002	-65.1297	-64.9062
798	-64.2028	-65.1692	-65.11	-64.9128
799	-64.0779	-65.1034	-65.1527	-64.9227
800	-64.1699	-65.0969	-65.1626	-64.8635
801	-64.2127	-65.1495	-65.1856	-64.8701
802	-64.2258	-65.1692	-65.1823	-64.8766
803	-64.2291	-65.1659	-65.1495	-64.8931
804	-64.2225	-65.2481	-65.179	-64.8076
805	-64.2225	-65.2185	-65.1626	-64.8668
806	-64.239	-65.2251	-65.179	-64.8175
807	-64.2488	-65.1856	-65.1429	-64.9292
808	-64.2554	-65.1396	-65.133	-64.8503
809	-64.2094	-65.2382	-65.1232	-64.801
810	-64.2685	-65.1692	-65.2119	-64.8339
811	-64.2455	-65.1988	-65.1067	-64.8536
812	-64.2028	-65.202	-65.1626	-64.7912
813	-64.3047	-65.1692	-65.0739	-64.8405
814	-64.2883	-65.1758	-65.1363	-64.7945
815	-64.2718	-65.2283	-65.0837	-64.8734
816	-64.2784	-65.1955	-65.0739	-64.8931
817	-64.3376	-65.2711	-65.1396	-64.8306
818	-64.3606	-65.1626	-65.1297	-64.9457
819	-64.4066	-65.2546	-65.133	-64.8898
820	-64.3606	-65.2349	-65.0673	-64.8799
821	-64.3967	-65.2086	-65.11	-64.8799
822	-64.4198	-65.2283	-65.0574	-64.9588
823	-64.4263	-65.1955	-65.041	-64.9227
824	-64.5249	-65.2251	-65.0673	-64.8832
825	-64.5216	-65.2678	-65.1133	-64.995
826	-64.5512	-65.2744	-65.0969	-64.9818
827	-64.4954	-65.2579	-65.1593	-65.018
828	-64.4954	-65.2546	-65.1199	-64.9917
829	-64.4395	-65.2744	-65.1429	-64.9687
830	-64.4428	-65.3401	-65.1396	-64.8997
831	-64.3672	-65.3993	-65.2185	-64.9095
832	-64.3902	-65.3664	-65.1659	-64.8766
833	-64.3507	-65.3598	-65.2053	-64.9522
834	-64.4066	-65.3795	-65.2119	-64.949
835	-64.3737	-65.4157	-65.1429	-65.0015
836	-64.4625	-65.3368	-65.1626	-64.9457
837	-64.4756	-65.3598	-65.064	-64.9227
838	-64.4789	-65.3763	-65.1429	-64.9818
839	-64.5118	-65.419	-65.1725	-64.9424
840	-64.5019	-65.4847	-65.1199	-64.9391
841	-64.4395	-65.4289	-65.1462	-64.9325
842	-64.4461	-65.4289	-65.1527	-64.972
843	-64.4362	-65.4584	-65.1725	-64.9522
844	-64.4559	-65.4913	-65.1593	-65.0015
845	-64.4625	-65.5275	-65.2349	-65.0311
846	-64.4559	-65.4716	-65.1462	-64.9522
847	-64.4526	-65.4453	-65.1955	-64.995
848	-64.5052	-65.4091	-65.2678	-64.9588
849	-64.5644	-65.3565	-65.156	-65.0673
850	-64.5512	-65.4026	-65.2218	-65.0081
851	-64.5611	-65.4814	-65.2481	-64.9983
852	-64.4789	-65.5045	-65.2316	-64.9818
853	-64.571	-65.4683	-65.1725	-65.0278
854	-64.5775	-65.4814	-65.2382	-65.0278
855	-64.4592	-65.4782	-65.2053	-65.1034
856	-64.5184	-65.4256	-65.1725	-65.1166
857	-64.5414	-65.534	-65.1988	-65.0673
858	-64.6137	-65.5406	-65.1462	-65.1002
859	-64.5381	-65.5209	-65.2086	-65.064
860	-64.5578	-65.6096	-65.1692	-65.1297
861	-64.5282	-65.6787	-65.1823	-65.1626
862	-64.5775	-65.6754	-65.1396	-65.2218
863	-64.5545	-65.6491	-65.1626	-65.2415
864	-64.5447	-65.6294	-65.1527	-65.2152
865	-64.6038	-65.6458	-65.1429	-65.2546
866	-64.6005	-65.5899	-65.2251	-65.2382
867	-64.5874	-65.6195	-65.2546	-65.2546
868	-64.5479	-65.6721	-65.2349	-65.3072
869	-64.5611	-65.6688	-65.2349	-65.3138
870	-64.5414	-65.705	-65.2678	-65.3598
871	-64.4559	-65.6984	-65.179	-65.3072
872	-64.4921	-65.7247	-65.2251	-65.2744
873	-64.5282	-65.7313	-65.2053	-65.2579
874	-64.4954	-65.7608	-65.1955	-65.2908
875	-64.5118	-65.7806	-65.2283	-65.2842
876	-64.5447	-65.7477	-65.1429	-65.2711
877	-64.5479	-65.8825	-65.1955	-65.2842
878	-64.6301	-65.8299	-65.1758	-65.3039
879	-64.6301	-65.8233	-65.1527	-65.3631
880	-64.571	-65.7477	-65.2053	-65.3335
881	-64.6071	-65.7707	-65.1527	-65.3861
882	-64.6203	-65.8134	-65.1692	-65.3795
883	-64.6597	-65.8036	-65.1823	-65.3763
884	-64.594	-65.843	-65.2349	-65.35
885	-64.6038	-65.8857	-65.2152	-65.327
886	-64.5677	-65.8529	-65.1988	-65.35
887	-64.64	-65.866	-65.179	-65.3368
888	-64.5907	-65.889	-65.0804	-65.3664
889	-64.6071	-65.9186	-65.1297	-65.3565
890	-64.6038	-66.0172	-65.0114	-65.3302
891	-64.5381	-66.0008	-65.0147	-65.4058
892	-64.5118	-65.9778	-64.995	-65.3598
893	-64.5512	-65.9975	-65.018	-65.3828
894	-64.5512	-65.9811	-65.0706	-65.3434
895	-64.5808	-65.9745	-65.0673	-65.4617
896	-64.5085	-66.0041	-65.0574	-65.4617
897	-64.4592	-65.9679	-65.0311	-65.4223
898	-64.3902	-65.9778	-65.0278	-65.4486
899	-64.4329	-65.9975	-65.087	-65.4683
900	-64.3672	-65.9844	-64.9654	-65.4289
901	-64.4888	-65.9745	-64.9851	-65.4519
902	-64.4395	-65.9975	-65.018	-65.4814
903	-64.5414	-65.9252	-65.0081	-65.4814
904	-64.5644	-65.9745	-65.1297	-65.4847
905	-64.5085	-65.9876	-65.11	-65.5012
906	-64.5282	-66.0369	-65.1692	-65.4847
907	-64.5085	-65.9942	-65.1265	-65.4453
908	-64.5315	-66.0501	-65.1955	-65.5012
909	-64.4789	-66.0271	-65.1363	-65.557
910	-64.4263	-66.083	-65.1462	-65.4814
911	-64.4625	-66.1356	-65.1462	-65.534
912	-64.4921	-66.1651	-65.156	-65.5538
913	-64.5118	-66.0665	-65.2119	-65.6064
914	-64.4723	-66.1125	-65.087	-65.6326
915	-64.4428	-66.0994	-65.1856	-65.7181
916	-64.4954	-66.175	-65.2251	-65.7345
917	-64.4921	-66.1684	-65.2382	-65.6885
918	-64.4263	-66.1454	-65.2349	-65.7313
919	-64.3113	-66.083	-65.1593	-65.7838
920	-64.3409	-66.1454	-65.2415	-65.7838
921	-64.3376	-66.0731	-65.2514	-65.6852
922	-64.3606	-66.1323	-65.2448	-65.7543
923	-64.2422	-66.1323	-65.1396	-65.7937
924	-64.2488	-66.1454	-65.1363	-65.7937
925	-64.1962	-66.1717	-65.202	-65.8792
926	-64.2094	-66.1323	-65.2185	-65.8595
927	-64.1535	-66.1191	-65.2481	-65.9778
928	-64.0582	-66.1618	-65.2086	-65.8364
929	-63.9662	-66.1816	-65.2776	-65.8233
930	-63.9694	-66.1618	-65.3335	-65.8364
931	-63.9333	-66.2703	-65.2974	-65.8397
932	-63.8971	-66.2243	-65.2776	-65.8529
933	-63.8412	-66.2572	-65.327	-65.8397
934	-63.7459	-66.2243	-65.327	-65.8266
935	-63.7985	-66.221	-65.3171	-65.8036
936	-63.7426	-66.2506	-65.3697	-65.82
937	-63.644	-66.2276	-65.373	-65.8332
938	-63.5881	-66.2342	-65.3894	-65.8825
939	-63.6177	-66.2342	-65.4091	-65.8266
940	-63.644	-66.2407	-65.3861	-65.774
941	-63.6079	-66.2374	-65.488	-65.82
942	-63.5323	-66.2276	-65.3927	-65.705
943	-63.5487	-66.3722	-65.3434	-65.6557
944	-63.529	-66.3426	-65.4617	-65.5899
945	-63.5027	-66.3196	-65.511	-65.6195
946	-63.5257	-66.2966	-65.4091	-65.6326
947	-63.5093	-66.2966	-65.4157	-65.6096
948	-63.5619	-66.2933	-65.488	-65.6589
949	-63.4928	-66.2802	-65.4946	-65.6655
950	-63.4567	-66.2736	-65.5307	-65.6524
951	-63.4304	-66.221	-65.511	-65.6787
952	-63.4402	-66.2243	-65.511	-65.7641
953	-63.4731	-66.3163	-65.5998	-65.7477
954	-63.4665	-66.2802	-65.5209	-65.7608
955	-63.4139	-66.2703	-65.534	-65.8069
956	-63.4764	-66.3262	-65.5702	-65.7378
957	-63.4402	-66.2999	-65.6096	-65.7838
958	-63.5093	-66.2309	-65.6754	-65.8332
959	-63.4468	-66.2276	-65.6589	-65.8529
960	-63.5125	-66.267	-65.6819	-65.8266
961	-63.5487	-66.2572	-65.7608	-65.8759
962	-63.4895	-66.3459	-65.6951	-65.797
963	-63.4534	-66.3229	-65.7017	-65.8003
964	-63.4271	-66.3591	-65.6984	-65.843
965	-63.4797	-66.3492	-65.7411	-65.8693
966	-63.4271	-66.3361	-65.774	-65.8989
967	-63.4106	-66.3525	-65.728	-65.8595
968	-63.4534	-66.4149	-65.7477	-65.8003
969	-63.4863	-66.4182	-65.7575	-65.8003
970	-63.4731	-66.3919	-65.7904	-65.8134
971	-63.4304	-66.4084	-65.7477	-65.7378
972	-63.4534	-66.4511	-65.7674	-65.7838
973	-63.4369	-66.4149	-65.7608	-65.7641
974	-63.4928	-66.3952	-65.7543	-65.774
975	-63.4895	-66.4051	-65.7345	-65.7641
976	-63.4994	-66.4347	-65.6984	-65.8134
977	-63.4731	-66.3821	-65.6984	-65.82
978	-63.5684	-66.4149	-65.6918	-65.7937
979	-63.5158	-66.3886	-65.7214	-65.7608
980	-63.4961	-66.3558	-65.7411	-65.7345
981	-63.5816	-66.3952	-65.7477	-65.6688
982	-63.5651	-66.4281	-65.7148	-65.6984
983	-63.598	-66.4248	-65.7773	-65.6458
984	-63.5487	-66.4117	-65.7313	-65.6359
985	-63.5487	-66.4182	-65.8069	-65.6326
986	-63.5356	-66.4708	-65.7444	-65.6228
987	-63.6276	-66.484	-65.7115	-65.6129
988	-63.6276	-66.5234	-65.6787	-65.6425
989	-63.667	-66.5892	-65.6524	-65.6096
990	-63.7065	-66.6089	-65.6557	-65.6031
991	-63.7525	-66.6713	-65.6326	-65.6852
992	-63.7459	-66.6187	-65.5998	-65.6557
993	-63.7525	-66.6615	-65.6425	-65.6392
994	-63.7985	-66.7206	-65.6261	-65.5636
995	-63.7328	-66.6648	-65.6228	-65.5603
996	-63.7722	-66.7634	-65.6326	-65.557
997	-63.6999	-66.7535	-65.6129	-65.557
998	-63.7131	-66.7535	-65.5932	-65.5833
999	-63.6802	-66.7436	-65.5768	-65.5505
1000	-63.6703	-66.7436	-65.5603	-65.5505
1001	-63.7196	-66.7305	-65.488	-65.5176
1002	-63.6868	-66.7009	-65.5373	-65.5538
1003	-63.7262	-66.6582	-65.5012	-65.6294
1004	-63.7558	-66.7568	-65.4552	-65.6294
1005	-63.7492	-66.7535	-65.4256	-65.5735
1006	-63.7689	-66.7995	-65.419	-65.5505
1007	-63.7196	-66.7962	-65.442	-65.5472
1008	-63.7163	-66.7634	-65.396	-65.5768
1009	-63.6966	-66.7831	-65.4289	-65.5373
1010	-63.7689	-66.7962	-65.4749	-65.4814
1011	-63.7952	-66.7995	-65.488	-65.4946
1012	-63.8445	-66.7962	-65.4584	-65.534
1013	-63.8643	-66.7667	-65.4058	-65.5538
1014	-63.8643	-66.7305	-65.3927	-65.511
1015	-63.861	-66.7108	-65.4026	-65.4847
1016	-63.8675	-66.7535	-65.4289	-65.465
1017	-63.8708	-66.7404	-65.3828	-65.3565
1018	-63.884	-66.7601	-65.3861	-65.3598
1019	-63.7887	-66.7469	-65.2974	-65.2875
1020	-63.8577	-66.7601	-65.2875	-65.2382
1021	-63.838	-66.7436	-65.3368	-65.2974
1022	-63.861	-66.8291	-65.2349	-65.2678
1023	-63.8544	-66.7601	-65.1955	-65.3138
1024	-63.93	-66.7962	-65.2316	-65.2514
1025	-63.907	-66.7897	-65.2382	-65.3039
1026	-63.8774	-66.7995	-65.2152	-65.2546
1027	-63.8675	-66.7732	-65.2283	-65.2448
1028	-63.9497	-66.7206	-65.2218	-65.1725
1029	-63.9629	-66.7634	-65.1199	-65.2514
1030	-63.9333	-66.7272	-65.1823	-65.2218
1031	-64.0056	-66.7699	-65.1232	-65.2744
1032	-64.0089	-66.7699	-65.1758	-65.3237
1033	-63.9333	-66.7009	-65.133	-65.2711
1034	-63.9563	-66.7338	-65.1626	-65.2776
1035	-63.9366	-66.7469	-65.1067	-65.3072
1036	-63.907	-66.7338	-65.1034	-65.3072
1037	-63.9201	-66.7634	-65.1692	-65.3565
1038	-63.8182	-66.7732	-65.1626	-65.2842
1039	-63.9333	-66.7338	-65.156	-65.3532
1040	-63.8511	-66.7272	-65.0903	-65.3993
1041	-63.8938	-66.7831	-65.0739	-65.3565
1042	-63.884	-66.7864	-65.1462	-65.3598
1043	-63.8445	-66.7206	-65.1232	-65.3204
1044	-63.8544	-66.7732	-65.0377	-65.3072
1045	-63.8774	-66.7831	-65.0476	-65.3795
1046	-63.7919	-66.7436	-65.0574	-65.327
1047	-63.7656	-66.7206	-64.9983	-65.3105
1048	-63.7591	-66.7765	-64.9522	-65.3138
1049	-63.7755	-66.8653	-64.9259	-65.3565
1050	-63.7229	-66.8225	-64.995	-65.2875
1051	-63.69	-66.8521	-64.972	-65.3072
1052	-63.7492	-66.7929	-65.0377	-65.35
1053	-63.7426	-66.7502	-64.9424	-65.3105
1054	-63.69	-66.7436	-64.8569	-65.2612
1055	-63.6868	-66.7009	-64.8569	-65.2251
1056	-63.6276	-66.7141	-64.8865	-65.1626
1057	-63.7131	-66.7404	-64.8635	-65.2119
1058	-63.7163	-66.6615	-64.8076	-65.1199
1059	-63.7295	-66.6943	-64.9062	-65.1199
1060	-63.6802	-66.7009	-64.9424	-65.1265
1061	-63.6802	-66.691	-64.8339	-65.1692
1062	-63.6342	-66.6516	-64.8471	-65.064
1063	-63.6243	-66.7305	-64.8569	-65.0607
1064	-63.6342	-66.6812	-64.8273	-65.0673
1065	-63.621	-66.7141	-64.778	-65.1133
1066	-63.6605	-66.6812	-64.7682	-65.2053
1067	-63.4205	-66.7009	-64.7517	-65.1396
1068	-63.4731	-66.7404	-64.7156	-65.0213
1069	-63.4895	-66.7634	-64.6827	-65.0936
1070	-63.4172	-66.8094	-64.7123	-65.0278
1071	-63.3975	-66.8094	-64.6893	-65.0443
1072	-63.4205	-66.862	-64.7156	-65.1199
1073	-63.3975	-66.8521	-64.7024	-65.064
1074	-63.3679	-66.8094	-64.7386	-64.9983
1075	-63.3383	-66.7535	-64.7747	-65.0213
1076	-63.2266	-66.7929	-64.6991	-65.0739
1077	-63.3055	-66.7864	-64.7353	-64.9917
1078	-63.2825	-66.7371	-64.6728	-64.9818
1079	-63.2036	-66.7995	-64.7287	-64.9654
1080	-63.2069	-66.7371	-64.6959	-64.9424
1081	-63.174	-66.7338	-64.7156	-64.9851
1082	-63.1871	-66.7798	-64.6137	-64.9522
1083	-63.1871	-66.7108	-64.5841	-64.9555
1084	-63.0754	-66.7272	-64.571	-64.9884
1085	-63.0721	-66.7009	-64.6137	-65.0213
1086	-63.0228	-66.7272	-64.6334	-65.0278
1087	-62.9998	-66.6943	-64.5874	-64.9917
1088	-62.9866	-66.7239	-64.5479	-65.041
1089	-62.9965	-66.7009	-64.5282	-65.0574
1090	-62.9242	-66.6943	-64.4329	-65.0574
1091	-62.9308	-66.6976	-64.5052	-65.0574
1092	-62.9275	-66.7535	-64.4329	-65.0969
1093	-62.9538	-66.6713	-64.4526	-65.1133
1094	-62.8716	-66.6648	-64.4954	-65.1363
1095	-62.8617	-66.6713	-64.5052	-65.0837
1096	-62.8946	-66.6417	-64.5151	-65.1297
1097	-62.9176	-66.7009	-64.4559	-65.1495
1098	-62.8683	-66.6976	-64.4986	-65.064
1099	-62.8453	-66.7272	-64.4461	-65.0541
1100	-62.8552	-66.7009	-64.423	-65.0508
1101	-62.865	-66.7075	-64.4428	-65.0804
1102	-62.8223	-66.7469	-64.4263	-65.1462
1103	-62.819	-66.7206	-64.4329	-65.0837
1104	-62.8223	-66.7108	-64.4493	-65.1034
1105	-62.7927	-66.7667	-64.4362	-65.0706
1106	-62.8617	-66.7141	-64.4198	-65.1067
1107	-62.8552	-66.7667	-64.3935	-65.0574
1108	-62.7467	-66.7469	-64.4395	-65.1199
1109	-62.7763	-66.8094	-64.3606	-65.0804
1110	-62.819	-66.7173	-64.3967	-65.1133
1111	-62.8059	-66.7009	-64.331	-65.0114
1112	-62.7204	-66.691	-64.3902	-65.0969
1113	-62.842	-66.6845	-64.4921	-65.087
1114	-62.7861	-66.6385	-64.4723	-65.0903
1115	-62.796	-66.6352	-64.4855	-65.0607
1116	-62.7763	-66.5859	-64.4822	-65.018
1117	-62.7664	-66.5103	-64.4789	-65.0706
1118	-62.8059	-66.553	-64.5578	-64.6334
1119	-62.7565	-66.6023	-64.5019	-64.8569
1120	-62.7631	-66.5431	-64.4033	-64.9227
1121	-62.7828	-66.6155	-64.4822	-64.9654
1122	-62.7072	-66.6582	-64.5249	-65.0443
1123	-62.7204	-66.668	-64.4526	-64.9983
1124	-62.704	-66.6483	-64.5841	-64.9917
1125	-62.819	-66.6878	-64.5512	-64.9753
1126	-62.842	-66.7141	-64.6367	-65.0081
1127	-62.8026	-66.7404	-64.7419	-65.0311
1128	-62.7763	-66.7667	-64.6959	-65.0541
1129	-62.8026	-66.8258	-64.8306	-65.1626
1130	-62.819	-66.7667	-64.8339	-65.1396
1131	-62.8814	-66.8258	-64.8306	-65.1725
1132	-62.7894	-66.8554	-64.8142	-65.1166
1133	-62.7335	-66.7864	-64.8865	-65.1199
1134	-62.7763	-66.816	-64.8043	-65.1232
1135	-62.7467	-66.862	-64.8076	-65.0739
1136	-62.7631	-66.8291	-64.8503	-65.0311
1137	-62.6053	-66.9047	-64.8734	-65.0739
1138	-62.5823	-66.9014	-64.8471	-65.11
1139	-62.5495	-66.9409	-64.8799	-65.087
1140	-62.4574	-66.8981	-64.8405	-65.0936
1141	-62.4541	-66.954	-64.9358	-65.1232
1142	-62.4081	-66.8948	-64.9588	-65.1265
1143	-62.4246	-66.908	-64.9785	-65.1232
1144	-62.2964	-66.8751	-64.9325	-65.1889
1145	-62.3062	-66.8916	-64.9884	-65.1955
1146	-62.2076	-66.908	-64.9621	-65.2119
1147	-62.2109	-66.8784	-64.9818	-65.1955
1148	-62.1123	-66.885	-65.0771	-65.2514
1149	-62.0729	-66.8817	-65.0574	-65.2514
1150	-62.0334	-66.8784	-65.0476	-65.1955
1151	-62.0235	-66.9113	-65.0574	-65.2711
1152	-61.9151	-66.862	-65.0706	-65.3105
1153	-61.8921	-66.862	-65.11	-65.3204
1154	-61.9019	-66.8094	-65.0706	-65.2809
1155	-61.8822	-66.9507	-65.1232	-65.3335
1156	-61.8099	-66.8521	-65.1495	-65.2974
1157	-61.8395	-66.885	-65.1692	-65.3105
1158	-61.7014	-66.8653	-65.1889	-65.3532
1159	-61.6883	-66.8587	-65.2152	-65.3697
1160	-61.6653	-66.931	-65.2185	-65.3631
1161	-61.6751	-66.9277	-65.2678	-65.3039
1162	-61.6916	-66.9606	-65.2119	-65.2974
1163	-61.6061	-67.0395	-65.2185	-65.327
1164	-61.6127	-67.0033	-65.2119	-65.4289
1165	-61.5305	-67.0329	-65.1988	-65.3697
1166	-61.5437	-67.1085	-65.1725	-65.396
1167	-61.3399	-67.1217	-65.0969	-65.3105
1168	-61.3727	-67.1348	-65.1199	-65.2974
1169	-61.3563	-67.1249	-65.1265	-65.3532
1170	-61.4089	-67.0986	-65.1856	-65.3171
1171	-61.3694	-67.1742	-65.1495	-65.2908
1172	-61.2971	-67.1775	-65.1593	-65.2809
1173	-61.3103	-67.0986	-65.1034	-65.2908
1174	-61.2938	-67.1184	-65.0607	-65.2875
1175	-61.3037	-67.1249	-65.1002	-65.327
1176	-61.3431	-67.2137	-65.1034	-65.3171
1177	-61.3366	-67.1414	-65.1166	-65.3204
1178	-61.2347	-67.2203	-65.0804	-65.3401
1179	-61.1821	-67.1775	-65.0969	-65.2842
1180	-61.1459	-67.1381	-65.0936	-65.3434
1181	-61.0999	-67.1414	-65.0541	-65.2908
1182	-61.0769	-67.2005	-65.0706	-65.3007
1183	-61.0506	-67.1217	-65.0213	-65.2776
1184	-61.1131	-67.0723	-64.9391	-65.2448
1185	-61.1163	-67.0723	-64.9588	-65.2875
1186	-61.0605	-67.0954	-64.8734	-65.2776
1187	-61.0736	-67.1052	-65.0443	-65.2744
1188	-61.067	-67.0493	-64.5545	-65.3105
1189	-61.0736	-67.0198	-64.7353	-65.3335
1190	-61.0407	-66.9573	-64.6433	-65.2645
1191	-61.0144	-66.8784	-64.7846	-65.2744
1192	-60.9356	-66.8817	-64.8471	-65.2645
1193	-60.9224	-66.9244	-64.9194	-65.1922
1194	-60.9783	-66.9442	-64.949	-65.2776
1195	-60.8534	-66.8784	-64.8997	-65.327
1196	-60.7975	-66.8324	-64.9259	-65.1692
1197	-60.9027	-66.8192	-64.9424	-65.1988
1198	-60.8731	-66.7634	-64.9391	-65.179
1199	-60.7877	-66.7272	-64.9391	-65.1396
1200	-60.7942	-66.6483	-64.9292	-65.133
1201	-60.7778	-66.5793	-64.9621	-65.1758
1202	-60.7219	-66.576	-64.9753	-65.1659
1203	-60.6726	-66.5629	-64.9785	-65.156
1204	-60.689	-66.5333	-64.9654	-65.133
1205	-60.6627	-66.4873	-65.0804	-65.2283
1206	-60.6365	-66.461	-64.9095	-65.2283
1207	-60.7022	-66.4347	-64.8931	-65.1495
1208	-60.6102	-66.4347	-64.8372	-65.1856
1209	-60.574	-66.3262	-64.8273	-65.2218
1210	-60.5641	-66.3459	-64.8208	-65.1692
1211	-60.6134	-66.2769	-64.8471	-65.2119
1212	-60.5346	-66.2637	-64.8109	-65.1823
1213	-60.6036	-66.198	-64.7616	-65.2185
1214	-60.6332	-66.152	-64.8668	-65.2251
1215	-60.6102	-66.1356	-64.949	-65.2415
1216	-60.5608	-65.9745	-64.9654	-65.2251
1217	-60.6332	-66.0534	-64.9851	-65.1593
1218	-60.5773	-65.9909	-64.9884	-65.1429
1219	-60.6003	-65.9055	-64.9917	-65.156
1220	-60.5839	-65.8134	-64.995	-65.156
1221	-60.5806	-65.8792	-64.972	-65.0771
1222	-60.528	-65.3861	-64.9391	-65.1297
1223	-60.5214	-65.4617	-64.9522	-65.2218
1224	-60.5181	-65.4289	-64.9292	-65.1067
1225	-60.5378	-65.442	-64.9161	-65.1232
1226	-60.5641	-65.4814	-64.972	-65.1593
1227	-60.5411	-65.488	-65.0213	-65.1659
1228	-60.5411	-65.534	-64.9555	-65.1988
1229	-60.5214	-65.5012	-64.9424	-65.1232
1230	-60.459	-65.4354	-64.9259	-65.0837
1231	-60.4491	-65.4814	-64.9687	-65.1823
1232	-60.3636	-65.3368	-64.9555	-65.2546
1233	-60.3866	-65.4058	-65.0213	-65.2152
1234	-60.4064	-65.4584	-65.0377	-65.1725
1235	-60.3472	-65.373	-65.0706	-65.1856
1236	-60.3899	-65.3763	-65.0574	-65.1429
1237	-60.334	-65.4058	-65.0541	-65.1659
1238	-60.4195	-65.4223	-65.0607	-65.1922
1239	-60.3603	-65.4519	-65.0476	-65.1593
1240	-60.3045	-65.3861	-65.041	-65.133
1241	-60.2782	-65.396	-65.0903	-65.1002
1242	-59.9067	-65.3565	-65.1002	-65.1527
1243	-60.1072	-65.2842	-65.0574	-65.1626
1244	-60.5477	-65.3138	-65.0936	-65.1429
1245	-60.1368	-65.2974	-65.0213	-65.1297
1246	-60.265	-65.2776	-65.0673	-65.2283
1247	-60.2486	-65.1955	-65.0015	-65.2251
1248	-60.2815	-65.1922	-64.995	-65.2185
1249	-60.2979	-65.2053	-65.0541	-65.133
1250	-60.2124	-65.1758	-65.0048	-65.1593
1251	-60.3143	-65.1659	-64.9358	-65.1462
1252	-60.334	-65.1988	-65.0344	-65.1758
1253	-60.3143	-65.2119	-65.0443	-65.2185
1254	-60.3406	-65.2152	-64.9851	-65.3039
1255	-60.2552	-65.2283	-64.9851	-65.3072
1256	-60.242	-65.1002	-65.11	-65.2711
1257	-60.2453	-65.0804	-65.1166	-65.3171
1258	-60.219	-65.0377	-65.0771	-65.2711
1259	-60.2815	-65.0739	-65.0673	-65.2974
1260	-60.311	-65.11	-65.0476	-65.3138
1261	-60.196	-65.0344	-65.0541	-65.3237
1262	-60.1763	-65.0476	-65.1265	-65.2185
1263	-60.196	-65.0377	-65.0837	-65.3072
1264	-60.196	-65.0344	-65.1955	-65.2283
1265	-60.242	-65.0541	-65.179	-65.2711
1266	-60.1533	-65.0607	-65.2086	-65.2283
1267	-60.1697	-65.0114	-65.1889	-65.202
1268	-60.1303	-65.0081	-65.1626	-65.156
1269	-60.1533	-64.9917	-65.1955	-65.1889
1270	-60.1598	-64.9621	-65.1922	-65.1823
1271	-60.1598	-64.995	-65.2612	-65.2349
1272	-60.15	-64.9325	-65.1692	-65.202
1273	-60.1598	-64.8964	-65.2119	-65.1133
1274	-60.173	-64.9128	-65.2514	-65.1166
1275	-60.265	-64.8931	-65.2612	-65.133
1276	-60.2223	-64.9029	-65.2283	-65.156
1277	-60.2584	-64.8701	-65.2776	-65.1363
1278	-60.2453	-64.8602	-65.2875	-65.1692
1279	-60.2847	-64.8273	-65.2612	-65.2744
1280	-60.2617	-64.8175	-65.3072	-65.2119
1281	-60.2059	-64.8175	-65.3631	-65.2086
1282	-60.2584	-64.8273	-65.3105	-65.2842
1283	-60.3373	-64.8569	-65.4256	-65.202
1284	-60.3143	-64.8273	-65.3532	-65.2514
1285	-60.3505	-64.8372	-65.4026	-65.2678
1286	-60.334	-64.7484	-65.3697	-65.2382
1287	-60.4228	-64.7978	-65.3664	-65.2152
1288	-60.4721	-64.8734	-65.4256	-65.2119
1289	-60.5576	-64.8339	-65.4453	-65.1823
1290	-60.5083	-64.8405	-65.4223	-65.2711
1291	-60.5773	-64.7912	-65.4256	-65.2776
1292	-60.5148	-64.8339	-65.4519	-65.2744
1293	-60.6134	-64.8208	-65.4354	-65.3105
1294	-60.5543	-64.8142	-65.4683	-65.2941
1295	-60.6529	-64.801	-65.4026	-65.3171
1296	-60.6397	-64.7649	-65.4519	-65.3467
1297	-60.6595	-64.7747	-65.4321	-65.3434
1298	-60.7548	-64.8306	-65.4058	-65.3204
1299	-60.7778	-64.7123	-65.5012	-65.2283
1300	-60.7581	-64.7517	-65.4552	-65.2514
1301	-60.7975	-64.778	-65.4223	-65.2448
1302	-60.8337	-64.8076	-65.4847	-65.3039
1303	-60.8172	-64.7616	-65.511	-65.179
1304	-60.8665	-64.732	-65.5242	-65.1955
1305	-60.9027	-64.7123	-65.5242	-65.1758
1306	-61.0177	-64.6893	-65.6129	-65.1889
1307	-60.9882	-64.7189	-65.5899	-65.1626
1308	-60.9849	-64.6991	-65.5702	-65.1462
1309	-61.0605	-64.6926	-65.5702	-65.1527
1310	-61.1163	-64.732	-65.5866	-65.0903
1311	-61.1229	-64.7945	-65.5603	-65.0771
1312	-61.1328	-64.7189	-65.5866	-65.0771
1313	-61.1558	-64.7222	-65.6129	-65.0837
1314	-61.1394	-64.6663	-65.6228	-65.0837
1315	-61.1591	-64.5973	-65.6261	-65.1133
1316	-61.1459	-64.5742	-65.6425	-65.1659
1317	-61.1722	-64.64	-65.6754	-65.1758
1318	-61.1821	-64.5611	-65.6458	-65.1593
1319	-61.1919	-64.594	-65.6622	-65.1626
1320	-61.1854	-64.5841	-65.6622	-65.1429
1321	-61.215	-64.5874	-65.6425	-65.1133
1322	-61.2774	-64.6893	-65.705	-65.087
1323	-61.2807	-64.6531	-65.6787	-65.1067
1324	-61.3234	-64.6696	-65.7444	-65.0936
1325	-61.2906	-64.6498	-65.7247	-65.0673
1326	-61.261	-64.617	-65.7313	-65.0508
1327	-61.3563	-64.6104	-65.7082	-65.1232
1328	-61.2675	-64.6038	-65.7214	-65.0739
1329	-61.2347	-64.5841	-65.728	-65.0936
1330	-61.2741	-64.4954	-65.705	-65.0574
1331	-61.3694	-64.5874	-65.751	-65.1067
1332	-61.3004	-64.6597	-65.6688	-65.041
1333	-61.2807	-64.5414	-65.7148	-65.1429
1334	-61.3629	-64.6038	-65.7608	-65.1922
1335	-61.4188	-64.5907	-65.7247	-65.1922
1336	-61.3859	-64.5348	-65.7115	-65.1922
1337	-61.3793	-64.4855	-65.7641	-65.1199
1338	-61.399	-64.5151	-65.7641	-65.0476
1339	-61.3694	-64.5216	-65.7543	-65.064
1340	-61.3859	-64.4691	-65.7181	-65.0311
1341	-61.3826	-64.5019	-65.7543	-65.0771
1342	-61.4582	-64.4822	-65.8233	-65.064
1343	-61.4516	-64.4526	-65.7313	-65.0804
1344	-61.5141	-64.5249	-65.7345	-65.0476
1345	-61.4352	-64.4625	-65.7773	-65.0607
1346	-61.4549	-64.5019	-65.7575	-65.0311
1347	-61.4319	-64.4855	-65.7674	-65.1034
1348	-61.4089	-64.4954	-65.774	-65.0969
1349	-61.3925	-64.5249	-65.7707	-65.0246
1350	-61.4648	-64.5019	-65.7313	-65.0246
1351	-61.445	-64.4888	-65.7937	-65.1429
1352	-61.4549	-64.5282	-65.7937	-65.1133
1353	-61.4418	-64.4329	-65.7608	-65.0048
1354	-61.4713	-64.4855	-65.7773	-65.0278
1355	-61.5568	-64.4461	-65.774	-65.0837
1356	-61.5962	-64.4789	-65.7444	-65.041
1357	-61.5305	-64.4954	-65.797	-65.0673
1358	-61.5601	-64.5545	-65.8825	-64.9785
1359	-61.5798	-64.5315	-65.9022	-65.0246
1360	-61.6488	-64.5447	-65.9318	-64.9555
1361	-61.6225	-64.5841	-65.9712	-65.0508
1362	-61.6324	-64.5249	-65.9449	-65.0147
1363	-61.685	-64.5414	-65.9055	-64.9753
1364	-61.6948	-64.6104	-65.9318	-64.9851
1365	-61.7672	-64.6203	-65.8693	-64.9325
1366	-61.6883	-64.7024	-65.9712	-64.9325
1367	-61.7277	-64.6203	-65.9055	-64.9029
1368	-61.6455	-64.571	-65.8595	-64.8701
1369	-61.6258	-64.6334	-65.9055	-64.8339
1370	-61.6718	-64.6005	-65.9318	-64.8339
1371	-61.685	-64.5644	-65.8627	-64.801
1372	-61.6061	-64.5216	-65.9745	-64.7747
1373	-61.5897	-64.6433	-65.9351	-64.7682
1374	-61.5437	-64.5973	-65.8989	-64.709
1375	-61.662	-64.5249	-65.9153	-64.6203
1376	-61.6751	-64.5775	-65.9318	-64.6268
1377	-61.639	-64.5841	-65.889	-64.6334
1378	-61.6521	-64.6235	-65.9186	-64.6893
1379	-61.7376	-64.6005	-65.9153	-64.6597
1380	-61.7507	-64.5611	-65.9383	-64.6926
1381	-61.8198	-64.5184	-65.8956	-64.7156
1382	-61.777	-64.5381	-65.8989	-64.732
1383	-61.7869	-64.6203	-65.9646	-64.7189
1384	-61.8822	-64.5775	-65.9219	-64.5742
1385	-61.9184	-64.5808	-65.9515	-64.617
1386	-61.9249	-64.5973	-66.0106	-64.5118
1387	-61.9217	-64.6728	-65.9219	-64.5447
1388	-61.8526	-64.6663	-65.9285	-64.5184
1389	-61.8395	-64.6728	-65.9055	-64.5808
1390	-61.846	-64.6728	-65.9318	-64.5085
1391	-61.8395	-64.7156	-65.9219	-64.5118
1392	-61.8559	-64.6959	-65.8825	-64.4493
1393	-61.9249	-64.7616	-65.9482	-64.4428
1394	-61.9052	-64.6104	-65.9449	-64.4395
1395	-61.9479	-64.6268	-65.9909	-64.4625
1396	-61.9348	-64.7057	-65.9712	-64.4132
1397	-61.9381	-64.6696	-65.9811	-64.4954
1398	-61.8691	-64.7123	-66.0567	-64.4296
1399	-61.8559	-64.6926	-65.9811	-64.4691
1400	-61.8493	-64.6696	-66.0567	-64.4888
1401	-61.8559	-64.6959	-66.0468	-64.4329
1402	-61.9184	-64.7517	-66.0271	-64.3573
1403	-61.8625	-64.7813	-66.0698	-64.4198
1404	-61.8888	-64.7254	-66.06	-64.308
1405	-61.8789	-64.7649	-66.0797	-64.4066
1406	-61.8888	-64.7452	-66.1356	-64.3211
1407	-61.8789	-64.7452	-66.0435	-64.3803
1408	-61.8559	-64.686	-66.0731	-64.377
1409	-61.8198	-64.7517	-66.0632	-64.377
1410	-61.7803	-64.7287	-66.1323	-64.3672
1411	-61.7836	-64.7682	-66.1027	-64.3507
1412	-61.7803	-64.7879	-66.198	-64.3113
1413	-61.7474	-64.7715	-66.2112	-64.3179
1414	-61.7047	-64.732	-66.221	-64.239
1415	-61.6751	-64.7254	-66.2079	-64.216
1416	-61.6423	-64.7254	-66.2506	-64.2817
1417	-61.7047	-64.7386	-66.2309	-64.2357
1418	-61.6554	-64.6926	-66.2079	-64.2554
1419	-61.754	-64.7715	-66.2112	-64.2718
1420	-61.7737	-64.7452	-66.2144	-64.2981
1421	-61.6981	-64.6926	-66.1684	-64.3146
1422	-61.7244	-64.6663	-66.198	-64.4066
1423	-61.7639	-64.6827	-66.1586	-64.3507
1424	-61.7409	-64.617	-66.1356	-64.3146
1425	-61.7376	-64.6597	-66.0863	-64.2258
1426	-61.7014	-64.571	-66.1125	-64.1929
1427	-61.708	-64.5315	-66.0271	-64.1469
1428	-61.7442	-64.5216	-66.1191	-64.1798
1429	-61.6686	-64.4986	-66.083	-64.1765
1430	-61.639	-64.5151	-66.0863	-64.1601
1431	-61.662	-64.594	-66.0205	-64.2127
1432	-61.639	-64.5841	-66.06	-64.2127
1433	-61.5272	-64.617	-66.0468	-64.2521
1434	-61.5469	-64.6334	-66.1191	-64.1929
1435	-61.4746	-64.6498	-66.0205	-64.1502
1436	-61.4845	-64.617	-66.0304	-64.2422
1437	-61.5667	-64.6498	-66.0797	-64.1502
1438	-61.4418	-64.6564	-66.0895	-64.1667
1439	-61.4911	-64.6663	-66.0928	-64.2192
1440	-61.4615	-64.6531	-66.129	-64.2521
1441	-61.3892	-64.6005	-66.0632	-64.2291
1442	-61.3497	-64.5611	-66.0008	-64.2653
1443	-61.3957	-64.5348	-66.0337	-64.2258
1444	-61.3662	-64.6203	-65.9778	-64.2718
1445	-61.4253	-64.6235	-66.083	-64.2751
1446	-61.4089	-64.6498	-66.0567	-64.2488
1447	-61.3727	-64.6663	-66.0665	-64.2751
1448	-61.3103	-64.5611	-66.0994	-64.2455
1449	-61.2314	-64.5282	-66.0895	-64.2488
1450	-61.2906	-64.5315	-66.0435	-64.2455
1451	-61.2675	-64.5808	-66.1027	-64.2192
1452	-61.2314	-64.6531	-65.9975	-64.2653
1453	-61.3037	-64.686	-66.0665	-64.2948
1454	-61.215	-64.6498	-66.0205	-64.2883
1455	-61.2051	-64.5742	-66.0271	-64.2554
1456	-61.1788	-64.5808	-66.0665	-64.2324
1457	-61.1525	-64.6038	-66.1881	-64.2718
1458	-61.1328	-64.6334	-66.1684	-64.2521
1459	-61.1131	-64.6663	-66.1849	-64.2455
1460	-61.1689	-64.6071	-66.1093	-64.285
1461	-61.1788	-64.6235	-66.1586	-64.2225
1462	-61.1985	-64.6268	-66.1651	-64.1765
1463	-61.0703	-64.6104	-66.244	-64.1831
1464	-61.1459	-64.6203	-66.1816	-64.1634
1465	-61.1163	-64.6696	-66.2079	-64.1469
1466	-61.067	-64.6498	-66.2013	-64.1305
1467	-61.1229	-64.6071	-66.2539	-64.1371
1468	-61.1098	-64.6466	-66.2605	-64.1732
1469	-61.1492	-64.6498	-66.2013	-64.1436
1470	-61.044	-64.7747	-66.2276	-64.1798
1471	-60.9586	-64.6761	-66.2243	-64.1601
1472	-60.9487	-64.5677	-66.244	-64.1699
1473	-61.0013	-64.594	-66.3032	-64.1864
1474	-61.0375	-64.6334	-66.2473	-64.1272
1475	-61.1229	-64.5184	-66.2835	-64.1765
1476	-61.067	-64.4493	-66.267	-64.1272
1477	-61.0736	-64.4592	-66.2112	-64.1535
1478	-61.0177	-64.4362	-66.221	-64.1732
1479	-61.0539	-64.4723	-66.2769	-64.2061
1480	-61.1163	-64.5447	-66.2966	-64.2488
1481	-61.1426	-64.5315	-66.2736	-64.2061
1482	-61.1492	-64.4986	-66.2933	-64.2225
1483	-61.1854	-64.5841	-66.2374	-64.1601
1484	-61.1492	-64.5315	-66.2013	-64.1502
1485	-61.1821	-64.4493	-66.2079	-64.2225
1486	-61.1492	-64.4658	-66.244	-64.1798
1487	-61.1361	-64.4526	-66.2177	-64.1502
1488	-61.1591	-64.4395	-66.2276	-64.0911
1489	-61.1163	-64.4132	-66.2079	-64.1272
1490	-61.1854	-64.4526	-66.1553	-64.1009
1491	-61.0999	-64.4395	-66.1257	-64.0845
1492	-61.1624	-64.4428	-66.1388	-64.0417
1493	-61.0769	-64.4	-66.1618	-63.999
1494	-61.0736	-64.4592	-66.0994	-63.976
1495	-61.1755	-64.423	-66.1356	-64.0417
1496	-61.1196	-64.4263	-66.1816	-64.0286
1497	-61.1394	-64.4658	-66.1947	-64.0056
1498	-61.1394	-64.4921	-66.1783	-64.0187
1499	-61.067	-64.4986	-66.1849	-63.9793
1500	-61.0802	-64.5348	-66.1914	-64.0286
1501	-61.0933	-64.5447	-66.1586	-64.0286
1502	-61.1098	-64.5611	-66.1487	-64.0417
1503	-61.1229	-64.5315	-66.1421	-64.0516
1504	-61.0407	-64.594	-66.1257	-64.0187
1505	-61.0933	-64.5742	-66.106	-64.045
1506	-61.1525	-64.5479	-66.1388	-64.0516
1507	-61.0966	-64.5775	-66.0797	-64.0943
1508	-61.0802	-64.5184	-66.0534	-64.0779
1509	-61.0375	-64.5907	-66.1093	-64.1502
1510	-61.0999	-64.5874	-66.1224	-64.0352
1511	-61.1032	-64.5775	-66.0435	-64.1042
1512	-61.0835	-64.617	-66.0337	-64.0385
1513	-61.1196	-64.6498	-66.0172	-64.0648
1514	-61.0144	-64.6498	-66.0074	-64.0023
1515	-61.0243	-64.6301	-66.0238	-63.9464
1516	-61.0375	-64.7057	-66.0632	-64.0417
1517	-61.0835	-64.7452	-65.9449	-63.9431
1518	-61.0177	-64.6761	-65.9646	-63.9563
1519	-61.0605	-64.7057	-66.0238	-63.8873
1520	-61.0638	-64.7024	-65.9745	-63.9267
1521	-61.09	-64.7156	-65.912	-63.8873
1522	-61.1426	-64.7123	-65.8857	-63.9497
1523	-61.0835	-64.6991	-65.9383	-63.8281
1524	-61.0276	-64.801	-65.8496	-63.9267
1525	-61.0144	-64.7945	-65.8595	-64.0122
1526	-60.9388	-64.8043	-65.8036	-63.976
1527	-60.9454	-64.8536	-65.751	-64.0286
1528	-61.0046	-64.8635	-65.8134	-64.0385
1529	-60.9619	-64.9259	-65.7641	-64.022
1530	-61.0144	-64.8766	-65.8069	-64.0056
1531	-60.929	-64.8241	-65.7608	-63.9727
1532	-60.8238	-64.9062	-65.7543	-64.0779
1533	-60.8698	-64.8931	-65.7806	-64.0056
1534	-60.7844	-64.9029	-65.7641	-64.045
1535	-60.837	-64.9062	-65.6524	-64.0056
1536	-60.837	-64.9128	-65.7641	-63.9826
1537	-60.7383	-64.9259	-65.7313	-64.0056
1538	-60.7942	-64.9654	-65.7411	-64.0319
1539	-60.8107	-64.9522	-65.728	-64.0352
1540	-60.8008	-64.8635	-65.6064	-64.0549
1541	-60.7515	-64.801	-65.5801	-64.0187
1542	-60.7745	-64.8964	-65.557	-64.0779
1543	-60.6923	-64.8832	-65.5176	-64.068
1544	-60.6726	-64.9785	-65.5439	-64.0713
1545	-60.6858	-64.9818	-65.534	-64.1535
1546	-60.7383	-64.9555	-65.4782	-64.1042
1547	-60.6726	-64.9095	-65.5242	-64.1239
1548	-60.6134	-64.9161	-65.5735	-64.0976
1549	-60.5839	-64.9621	-65.5735	-64.1042
1550	-60.6233	-64.949	-65.5965	-64.0648
1551	-60.666	-64.9391	-65.557	-64.0943
1552	-60.7383	-64.9292	-65.6754	-64.1502
1553	-60.666	-65.0048	-65.6688	-64.2127
1554	-60.6726	-65.0048	-65.5998	-64.216
1555	-60.6759	-64.9292	-65.6622	-64.2094
1556	-60.7088	-65.0114	-65.6688	-64.216
1557	-60.7745	-65.0607	-65.6294	-64.2324
1558	-60.7975	-65.0278	-65.6491	-64.2127
1559	-60.7383	-65.018	-65.6326	-64.285
1560	-60.7252	-65.0837	-65.6458	-64.2554
1561	-60.8041	-65.0739	-65.6294	-64.2751
1562	-60.8041	-65.1692	-65.6228	-64.3442
1563	-60.7679	-65.1495	-65.6425	-64.3047
1564	-60.7745	-65.11	-65.6984	-64.3672
1565	-60.7745	-65.0771	-65.7871	-64.3737
1566	-60.7646	-65.0607	-65.7773	-64.3343
1567	-60.7745	-65.0903	-65.728	-64.3967
1568	-60.837	-65.1133	-65.7411	-64.3639
1569	-60.8107	-65.0936	-65.797	-64.4132
1570	-60.8435	-65.0739	-65.8167	-64.4099
1571	-60.837	-65.1922	-65.7871	-64.4198
1572	-60.7778	-65.1363	-65.751	-64.4625
1573	-60.8567	-65.0739	-65.6951	-64.4296
1574	-60.8468	-65.0804	-65.7378	-64.4526
1575	-60.8205	-65.0278	-65.7575	-64.5019
1576	-60.86	-65.0443	-65.7871	-64.4855
1577	-60.86	-65.0804	-65.82	-64.4625
1578	-60.8895	-65.0574	-65.8759	-64.4723
1579	-60.8698	-65.11	-65.8693	-64.5348
1580	-60.9914	-65.0213	-65.8562	-64.5184
1581	-60.9783	-64.9917	-65.8562	-64.5151
1582	-60.9158	-65.1297	-65.8956	-64.571
1583	-60.9421	-65.0344	-65.8529	-64.5973
1584	-61.0473	-65.0377	-65.912	-64.6433
1585	-60.9947	-65.0673	-65.9186	-64.686
1586	-60.9651	-65.0476	-66.0008	-64.6137
1587	-61.0079	-65.1429	-65.9942	-64.6663
1588	-61.0539	-65.0936	-66.0041	-64.6466
1589	-61.0046	-65.0771	-65.9679	-64.7813
1590	-61.0506	-65.1232	-66.0008	-64.7912
1591	-61.0605	-65.1856	-65.9909	-64.7945
1592	-61.1229	-65.1626	-65.9646	-64.6893
1593	-61.09	-65.1889	-65.9712	-64.6959
1594	-61.1689	-65.1692	-66.0304	-64.7682
1595	-61.0638	-65.2283	-65.9679	-64.7879
1596	-61.1163	-65.2481	-66.0501	-64.7978
1597	-61.1657	-65.2908	-66.0994	-64.7123
1598	-61.1163	-65.2481	-66.1125	-64.7254
1599	-61.1722	-65.2316	-66.0665	-64.663
1600	-61.1788	-65.2448	-66.0172	-64.6564
1601	-61.284	-65.2612	-66.0008	-64.6926
1602	-61.2051	-65.2875	-65.9153	-64.686
1603	-61.3234	-65.2612	-65.9482	-64.6696
1604	-61.2412	-65.2678	-66.0106	-64.7484
1605	-61.2741	-65.3171	-65.9252	-64.709
1606	-61.2906	-65.2448	-65.9153	-64.6498
1607	-61.3596	-65.2283	-65.9416	-64.6794
1608	-61.3563	-65.2908	-65.9515	-64.7583
1609	-61.3925	-65.35	-65.9942	-64.709
1610	-61.3859	-65.2809	-65.9055	-64.686
1611	-61.353	-65.2974	-65.9844	-64.6433
1612	-61.3497	-65.2809	-65.9712	-64.6498
1613	-61.3366	-65.2514	-65.9548	-64.7057
1614	-61.4319	-65.2086	-65.8595	-64.6761
1615	-61.3694	-65.202	-65.8792	-64.7452
1616	-61.3826	-65.2382	-65.82	-64.7057
1617	-61.4582	-65.2612	-65.8233	-64.755
1618	-61.4418	-65.2809	-65.8529	-64.7978
1619	-61.4385	-65.2349	-65.8069	-64.7419
1620	-61.4516	-65.2382	-65.8463	-64.7747
1621	-61.5338	-65.2152	-65.9186	-64.8635
1622	-61.4648	-65.3039	-65.8857	-64.8799
1623	-61.5174	-65.2776	-65.9449	-64.8701
1624	-61.5141	-65.2842	-65.8923	-64.8405
1625	-61.4878	-65.3007	-65.9811	-64.8503
1626	-61.5272	-65.3401	-66.0337	-64.7912
1627	-61.6094	-65.3237	-65.9252	-64.7846
1628	-61.6423	-65.3467	-65.9219	-64.8241
1629	-61.6521	-65.3631	-65.8299	-64.8898
1630	-61.6455	-65.2908	-65.8923	-64.8043
1631	-61.6587	-65.4058	-65.8726	-64.7945
1632	-61.6521	-65.4026	-65.8562	-64.8668
1633	-61.593	-65.373	-65.8463	-64.8701
1634	-61.7277	-65.419	-65.8496	-64.8602
1635	-61.6948	-65.419	-65.8266	-64.8635
1636	-61.6981	-65.3927	-65.8003	-64.8043
1637	-61.6883	-65.3894	-65.8266	-64.8109
1638	-61.7113	-65.4256	-65.8069	-64.8306
1639	-61.8	-65.4091	-65.8529	-64.8668
1640	-61.7639	-65.4749	-65.8101	-64.8668
1641	-61.7672	-65.4617	-65.8036	-64.8208
1642	-61.7376	-65.5307	-65.7444	-64.8799
1643	-61.7146	-65.4814	-65.7148	-64.8701
1644	-61.7179	-65.4683	-65.7871	-64.9227
1645	-61.8099	-65.4552	-65.6655	-64.9095
1646	-61.6981	-65.4026	-65.6951	-64.9391
1647	-61.7902	-65.4946	-65.6326	-64.9194
1648	-61.7672	-65.4979	-65.6622	-64.9325
1649	-61.7869	-65.5472	-65.6458	-64.9555
1650	-61.8428	-65.511	-65.6162	-64.9029
1651	-61.8559	-65.4814	-65.6162	-64.9029
1652	-61.8855	-65.4387	-65.6491	-64.9259
1653	-61.8296	-65.4814	-65.6787	-64.9128
1654	-61.846	-65.4256	-65.7148	-64.8964
1655	-61.8888	-65.4946	-65.6819	-64.9391
1656	-61.8165	-65.3795	-65.6491	-64.9292
1657	-61.8559	-65.4387	-65.5998	-64.9621
1658	-61.8165	-65.3927	-65.6787	-64.9785
1659	-61.846	-65.3927	-65.6754	-65.018
1660	-61.9184	-65.4058	-65.6557	-65.0015
1661	-61.9677	-65.373	-65.6721	-65.087
1662	-61.9545	-65.419	-65.5899	-65.0771
1663	-61.9611	-65.4289	-65.6326	-65.0771
1664	-62.0367	-65.3993	-65.6524	-64.9884
1665	-62.0729	-65.3368	-65.6984	-65.1232
1666	-62.086	-65.3302	-65.6491	-65.1002
1667	-62.1057	-65.3598	-65.6754	-65.0706
1668	-62.086	-65.3532	-65.6524	-65.0377
1669	-62.0926	-65.4223	-65.6392	-65.0476
1670	-62.0301	-65.4124	-65.5636	-65.0081
1671	-62.0794	-65.4026	-65.5472	-65.0476
1672	-62.1287	-65.4223	-65.488	-65.0541
1673	-62.1123	-65.4321	-65.5143	-64.9292
1674	-62.0926	-65.4289	-65.5143	-64.9424
1675	-62.1123	-65.4453	-65.4913	-65.0443
1676	-62.1057	-65.4354	-65.419	-65.0147
1677	-62.1386	-65.4157	-65.419	-64.9983
1678	-62.132	-65.419	-65.4453	-65.0081
1679	-62.178	-65.4782	-65.4552	-64.9917
1680	-62.1715	-65.4979	-65.5012	-64.972
1681	-62.086	-65.5077	-65.4387	-64.9818
1682	-62.0959	-65.4716	-65.4354	-64.8931
1683	-62.1287	-65.465	-65.3861	-64.9621
1684	-62.1123	-65.5768	-65.3631	-64.9818
1685	-62.1945	-65.5505	-65.3631	-64.9292
1686	-62.1583	-65.4979	-65.373	-64.8668
1687	-62.1912	-65.4847	-65.3697	-64.9358
1688	-62.1353	-65.534	-65.373	-64.9062
1689	-62.1189	-65.5406	-65.3368	-64.8799
1690	-62.2109	-65.6031	-65.3237	-64.8438
1691	-62.2405	-65.557	-65.3039	-64.8241
1692	-62.2668	-65.6458	-65.3237	-64.7616
1693	-62.2668	-65.6491	-65.2941	-64.7386
1694	-62.2569	-65.5932	-65.3763	-64.709
1695	-62.2208	-65.6984	-65.2875	-64.6498
1696	-62.2043	-65.6195	-65.327	-64.6235
1697	-62.201	-65.6096	-65.2612	-64.5512
1698	-62.1748	-65.5669	-65.2579	-64.5414
1699	-62.1222	-65.5932	-65.2875	-64.5578
1700	-62.1945	-65.5669	-65.3007	-64.571
1701	-62.2142	-65.5998	-65.3467	-64.617
1702	-62.2635	-65.7017	-65.327	-64.5742
1703	-62.155	-65.6261	-65.3368	-64.5348
1704	-62.1024	-65.5768	-65.3138	-64.5381
1705	-62.1583	-65.5899	-65.3565	-64.5315
1706	-62.1616	-65.5899	-65.2875	-64.5249
1707	-62.155	-65.5899	-65.2842	-64.4526
1708	-62.1583	-65.5275	-65.2941	-64.4789
1709	-62.1452	-65.488	-65.2415	-64.4658
1710	-62.2405	-65.4552	-65.3007	-64.5151
1711	-62.2339	-65.5045	-65.2448	-64.4954
1712	-62.2668	-65.511	-65.2711	-64.3442
1713	-62.2372	-65.5538	-65.2875	-64.3442
1714	-62.1813	-65.5406	-65.2974	-64.3179
1715	-62.2208	-65.5866	-65.2514	-64.3704
1716	-62.178	-65.6326	-65.2251	-64.3836
1717	-62.2635	-65.511	-65.3401	-64.285
1718	-62.2569	-65.4749	-65.2612	-64.3836
1719	-62.3095	-65.442	-65.2711	-64.3442
1720	-62.2931	-65.4256	-65.2678	-64.3343
1721	-62.3161	-65.442	-65.2678	-64.2948
1722	-62.2734	-65.5373	-65.3072	-64.2784
1723	-62.2339	-65.488	-65.2809	-64.2225
1724	-62.2405	-65.5045	-65.2842	-64.2521
1725	-62.2372	-65.5077	-65.2678	-64.1535
1726	-62.2109	-65.442	-65.3598	-64.1962
1727	-62.1945	-65.4814	-65.3335	-64.1371
1728	-62.2043	-65.4026	-65.3434	-64.1634
1729	-62.1353	-65.488	-65.3598	-64.1798
1730	-62.1452	-65.4847	-65.3861	-64.1272
1731	-62.1419	-65.5373	-65.2744	-64.1502
1732	-62.1616	-65.4979	-65.2908	-64.1305
1733	-62.086	-65.5275	-65.327	-64.1141
1734	-62.1715	-65.5176	-65.3598	-64.1502
1735	-62.1189	-65.4913	-65.3434	-64.1173
1736	-62.0761	-65.5275	-65.2678	-64.0845
1737	-62.0531	-65.5998	-65.3434	-64.1108
1738	-62.0334	-65.5275	-65.2809	-64.0483
1739	-62.0104	-65.5209	-65.2941	-64.0352
1740	-61.9841	-65.4814	-65.2809	-63.953
1741	-61.9907	-65.5439	-65.2678	-63.9366
1742	-61.9545	-65.5472	-65.2908	-63.907
1743	-61.9052	-65.465	-65.3401	-63.8708
1744	-61.8888	-65.4058	-65.2251	-63.8445
1745	-61.8954	-65.419	-65.2744	-63.8675
1746	-61.8296	-65.4321	-65.2612	-63.8248
1747	-61.8033	-65.4289	-65.2776	-63.8281
1748	-61.7869	-65.3664	-65.179	-63.7656
1749	-61.8165	-65.4354	-65.1692	-63.7985
1750	-61.777	-65.4354	-65.133	-63.8018
1751	-61.8395	-65.4223	-65.1593	-63.7755
1752	-61.8165	-65.3828	-65.1955	-63.8873
1753	-61.754	-65.3927	-65.179	-63.8018
1754	-61.7639	-65.4321	-65.2251	-63.7887
1755	-61.6751	-65.4453	-65.2283	-63.7854
1756	-61.6521	-65.373	-65.2612	-63.7196
1757	-61.6028	-65.373	-65.3138	-63.7492
1758	-61.5995	-65.3763	-65.3072	-63.7722
1759	-61.5995	-65.3763	-65.3204	-63.7426
1760	-61.6193	-65.3138	-65.35	-63.7098
1761	-61.5798	-65.2514	-65.396	-63.7689
1762	-61.5732	-65.2941	-65.3072	-63.8051
1763	-61.5699	-65.2809	-65.2283	-63.7295
1764	-61.5108	-65.3007	-65.3072	-63.7361
1765	-61.5404	-65.3631	-65.3138	-63.667
1766	-61.5699	-65.3598	-65.3072	-63.7328
1767	-61.4779	-65.3335	-65.2842	-63.6375
1768	-61.5009	-65.442	-65.3072	-63.6407
1769	-61.4089	-65.3763	-65.2119	-63.7196
1770	-61.3892	-65.35	-65.2645	-63.6473
1771	-61.3694	-65.3138	-65.2678	-63.6933
1772	-61.353	-65.4321	-65.2349	-63.7065
1773	-61.3727	-65.3631	-65.3072	-63.644
1774	-61.3662	-65.3467	-65.3467	-63.6605
1775	-61.353	-65.4354	-65.2612	-63.6605
1776	-61.3662	-65.4387	-65.2546	-63.6539
1777	-61.3629	-65.4058	-65.3302	-63.6933
1778	-61.3234	-65.4519	-65.2875	-63.6868
1779	-61.3464	-65.4256	-65.2546	-63.6769
1780	-61.3464	-65.5242	-65.2711	-63.7229
1781	-61.3004	-65.4716	-65.2579	-63.7361
1782	-61.3497	-65.4749	-65.2185	-63.7689
1783	-61.3464	-65.4453	-65.1889	-63.7131
1784	-61.2774	-65.3795	-65.1856	-63.7229
1785	-61.3694	-65.465	-65.1856	-63.8117
1786	-61.3103	-65.4519	-65.2218	-63.8084
1787	-61.307	-65.4321	-65.2119	-63.7854
1788	-61.307	-65.5077	-65.1823	-63.861
1789	-61.2807	-65.5045	-65.0969	-63.8511
1790	-61.2906	-65.5669	-65.1856	-63.953
1791	-61.2741	-65.5702	-65.1527	-63.953
1792	-61.2544	-65.5472	-65.1659	-64.022
1793	-61.2971	-65.5603	-65.2481	-64.0549
1794	-61.2051	-65.6392	-65.1889	-64.0319
1795	-61.1821	-65.6294	-65.1199	-64.0319
1796	-61.238	-65.6228	-65.1692	-64.0582
1797	-61.2182	-65.5965	-65.1856	-64.0582
1798	-61.2445	-65.5768	-65.179	-64.1042
1799	-61.2051	-65.5603	-65.202	-64.0648
1800	-61.1492	-65.6655	-65.1626	-64.1042
1801	-61.1788	-65.7444	-65.2251	-64.0582
1802	-61.2182	-65.6688	-65.1725	-64.0582
1803	-61.2051	-65.7082	-65.1692	-64.0976
1804	-61.1591	-65.6622	-65.0344	-64.0746
1805	-61.1755	-65.6852	-65.0508	-64.0253
1806	-61.1919	-65.7214	-65.0771	-64.0615
1807	-61.1657	-65.7411	-65.0344	-64.0122
1808	-61.2182	-65.6951	-64.9917	-64.0516
1809	-61.2445	-65.6129	-64.9687	-64.0746
1810	-61.2544	-65.6721	-64.9983	-63.9892
1811	-61.1755	-65.7181	-65.0015	-64.068
1812	-61.2445	-65.6754	-64.9785	-64.0417
1813	-61.2248	-65.6787	-64.8997	-64.0976
1814	-61.2544	-65.7082	-64.8668	-64.1404
1815	-61.3168	-65.6984	-64.9161	-64.0976
1816	-61.3826	-65.705	-64.8043	-64.1404
1817	-61.422	-65.6622	-64.8471	-64.1272
1818	-61.3629	-65.6655	-64.7715	-64.1075
1819	-61.3662	-65.5899	-64.7813	-64.1371
1820	-61.4352	-65.7115	-64.7024	-64.1864
1821	-61.3957	-65.6557	-64.7616	-64.2324
1822	-61.4286	-65.6458	-64.7156	-64.2028
1823	-61.4516	-65.6885	-64.6827	-64.0845
1824	-61.4385	-65.6819	-64.7222	-64.1502
1825	-61.4023	-65.6819	-64.6597	-64.1995
1826	-61.4549	-65.6557	-64.5775	-64.1601
1827	-61.4845	-65.6589	-64.617	-64.1897
1828	-61.4385	-65.6425	-64.5841	-64.216
1829	-61.4352	-65.6951	-64.5677	-64.1699
1830	-61.4943	-65.6491	-64.5644	-64.1535
1831	-61.4615	-65.6852	-64.4986	-64.1502
1832	-61.399	-65.6754	-64.5216	-64.1075
1833	-61.376	-65.7543	-64.4329	-64.0648
1834	-61.376	-65.705	-64.3869	-64.1272
1835	-61.3629	-65.7181	-64.423	-64.0746
1836	-61.3662	-65.7707	-64.3902	-64.0779
1837	-61.4286	-65.8529	-64.2981	-64.1272
1838	-61.4253	-65.8299	-64.2587	-64.1173
1839	-61.3563	-65.7411	-64.1897	-64.1962
1840	-61.4188	-65.7411	-64.216	-64.2225
1841	-61.445	-65.7608	-64.2422	-64.2685
1842	-61.4319	-65.7674	-64.2291	-64.2094
1843	-61.4615	-65.751	-64.2488	-64.2324
1844	-61.4845	-65.7378	-64.2653	-64.2094
1845	-61.4878	-65.7411	-64.1502	-64.2291
1846	-61.4582	-65.8069	-64.1929	-64.2521
1847	-61.4352	-65.7411	-64.2455	-64.354
1848	-61.3694	-65.7806	-64.2455	-64.2521
1849	-61.4089	-65.8299	-64.1864	-64.3146
1850	-61.376	-65.8101	-64.2455	-64.2948
1851	-61.5108	-65.8101	-64.2324	-64.2718
1852	-61.4746	-65.8529	-64.1995	-64.3146
1853	-61.4911	-65.8956	-64.1305	-64.354
1854	-61.4845	-65.8463	-64.0911	-64.3967
1855	-61.4516	-65.8726	-64.1667	-64.3343
1856	-61.5042	-65.8627	-64.1042	-64.3014
1857	-61.5075	-65.8726	-64.1568	-64.3967
1858	-61.4878	-65.8923	-64.1864	-64.4526
1859	-61.4516	-65.8463	-64.1436	-64.4526
1860	-61.5338	-65.9219	-64.1502	-64.5282
1861	-61.4911	-65.8726	-64.1371	-64.4888
1862	-61.4648	-65.8693	-64.1568	-64.4329
1863	-61.3826	-65.9876	-64.1535	-64.4329
1864	-61.4122	-65.9318	-64.1502	-64.3803
1865	-61.4056	-65.9153	-64.216	-64.4461
1866	-61.3826	-65.9186	-64.1239	-64.4822
1867	-61.3037	-65.9186	-64.1699	-64.4099
1868	-61.307	-65.9285	-64.1798	-64.4395
1869	-61.3596	-65.9022	-64.1042	-64.4
1870	-61.3662	-65.9646	-64.1568	-64.4822
1871	-61.3694	-65.9581	-64.022	-64.4888
1872	-61.4483	-65.9055	-64.0385	-64.4526
1873	-61.4188	-65.9383	-63.9629	-64.4625
1874	-61.3629	-65.8693	-63.976	-64.4099
1875	-61.4385	-65.8989	-64.0187	-64.4855
1876	-61.4286	-65.8693	-64.0155	-64.571
1877	-61.4056	-65.8496	-64.0056	-64.4789
1878	-61.4418	-65.8792	-64.0155	-64.4723
1879	-61.4681	-65.9022	-64.0023	-64.5085
1880	-61.5141	-65.9482	-63.9892	-64.4263
1881	-61.4976	-65.9383	-63.8971	-64.4559
1882	-61.5338	-65.912	-63.9464	-64.3672
1883	-61.5535	-65.8562	-63.9431	-64.4033
1884	-61.6291	-65.9351	-63.9596	-64.5184
1885	-61.6455	-65.8989	-63.9629	-64.4395
1886	-61.7277	-65.8989	-63.9924	-64.4921
1887	-61.7606	-65.9088	-63.9629	-64.5545
1888	-61.7935	-65.912	-63.8544	-64.5447
1889	-61.8789	-65.9318	-63.8708	-64.5775
1890	-61.846	-65.9745	-63.8971	-64.5973
1891	-61.8625	-65.9285	-63.8347	-64.5381
1892	-61.8789	-65.8857	-63.8478	-64.5512
1893	-61.8822	-65.9252	-63.8215	-64.5808
1894	-61.9479	-65.8989	-63.8412	-64.5545
1895	-61.9019	-65.9482	-63.838	-64.64
1896	-61.9644	-65.9876	-63.8478	-64.6235
1897	-61.9447	-66.0304	-63.7492	-64.6959
1898	-61.9808	-66.0008	-63.7788	-64.5775
1899	-62.0466	-65.9548	-63.7689	-64.5085
1900	-62.0729	-65.9515	-63.7361	-64.5151
1901	-62.1517	-65.9712	-63.7459	-64.5315
1902	-62.1583	-65.8627	-63.8215	-64.5611
1903	-62.1287	-65.8134	-63.815	-64.6104
1904	-62.1419	-65.9088	-63.8412	-64.6696
1905	-62.2109	-65.9548	-63.884	-64.6761
1906	-62.178	-65.9778	-63.907	-64.6926
1907	-62.1912	-66.0304	-63.8445	-64.709
1908	-62.1945	-66.1125	-63.8412	-64.6564
1909	-62.2536	-66.0764	-63.8938	-64.6531
1910	-62.3128	-66.0764	-63.8741	-64.6071
1911	-62.2997	-66.0731	-63.8215	-64.5644
1912	-62.3358	-66.0764	-63.8511	-64.6137
1913	-62.372	-66.0961	-63.8412	-64.6137
1914	-62.3555	-66.0665	-63.815	-64.6104
1915	-62.3194	-66.0172	-63.8774	-64.6728
1916	-62.3325	-66.0764	-63.8248	-64.6334
1917	-62.349	-66.0501	-63.7656	-64.6301
1918	-62.3588	-66.0172	-63.7229	-64.6893
1919	-62.3785	-66.0764	-63.6309	-64.5512
1920	-62.3424	-66.0468	-63.6473	-64.594
1921	-62.2931	-66.0205	-63.6999	-64.6235
1922	-62.3227	-66.0139	-63.6342	-64.6663
1923	-62.3095	-65.9351	-63.6835	-64.7189
1924	-62.2964	-65.9646	-63.6079	-64.6926
1925	-62.3654	-65.8792	-63.5783	-64.6564
1926	-62.3161	-65.9186	-63.6013	-64.6926
1927	-62.3194	-65.9581	-63.5717	-64.6433
1928	-62.349	-65.9383	-63.5224	-64.6564
1929	-62.3522	-65.8332	-63.5586	-64.6597
1930	-62.418	-65.7838	-63.5684	-64.5907
1931	-62.4114	-65.7838	-63.5881	-64.5907
1932	-62.3621	-65.7937	-63.5093	-64.6235
1933	-62.3424	-65.7871	-63.5454	-64.6137
1934	-62.3785	-65.7838	-63.5586	-64.6203
1935	-62.372	-65.7247	-63.4994	-64.5907
1936	-62.3654	-65.7181	-63.5323	-64.594
1937	-62.3917	-65.6984	-63.5388	-64.5282
1938	-62.4114	-65.6326	-63.5651	-64.571
1939	-62.4476	-65.6557	-63.5125	-64.5742
1940	-62.4311	-65.6589	-63.4994	-64.5512
1941	-62.4804	-65.5636	-63.5651	-64.6005
1942	-62.5429	-65.6195	-63.5191	-64.6466
1943	-62.5725	-65.6294	-63.5257	-64.6203
1944	-62.5922	-65.488	-63.5093	-64.6334
1945	-62.5462	-65.5176	-63.4764	-64.6794
1946	-62.5593	-65.5373	-63.483	-64.6761
1947	-62.5692	-65.4552	-63.4928	-64.6203
1948	-62.5067	-65.4584	-63.4961	-64.6203
1949	-62.5692	-65.465	-63.575	-64.6433
1950	-62.6415	-65.4847	-63.5257	-64.571
1951	-62.6152	-65.3993	-63.4567	-64.64
1952	-62.5297	-65.373	-63.4304	-64.6531
1953	-62.5725	-65.3565	-63.4994	-64.5973
1954	-62.6251	-65.3368	-63.483	-64.6466
1955	-62.7204	-65.2316	-63.4534	-64.663
1956	-62.7368	-65.2678	-63.5323	-64.6827
1957	-62.6546	-65.2218	-63.5027	-64.7189
1958	-62.7204	-65.2941	-63.552	-64.7156
1959	-62.7138	-65.2382	-63.5454	-64.7156
1960	-62.7335	-65.1988	-63.529	-64.778
1961	-62.7138	-65.2678	-63.5323	-64.7649
1962	-62.6941	-65.3368	-63.5356	-64.801
1963	-62.7467	-65.35	-63.6276	-64.7879
1964	-62.7565	-65.3664	-63.6342	-64.8043
1965	-62.7631	-65.2875	-63.644	-64.7945
1966	-62.796	-65.3467	-63.5849	-64.8536
1967	-62.7796	-65.4157	-63.6309	-64.8076
1968	-62.7894	-65.3171	-63.6802	-64.7353
1969	-62.8124	-65.3664	-63.598	-64.7287
1970	-62.8059	-65.4256	-63.6572	-64.709
1971	-62.7796	-65.488	-63.6835	-64.7945
1972	-62.75	-65.534	-63.7492	-64.7912
1973	-62.6974	-65.5077	-63.7131	-64.8405
1974	-62.7335	-65.5505	-63.6835	-64.7879
1975	-62.704	-65.5406	-63.6638	-64.8339
1976	-62.7401	-65.6261	-63.6802	-64.8208
1977	-62.7302	-65.5932	-63.6342	-64.7682
1978	-62.6711	-65.6721	-63.5849	-64.7649
1979	-62.6875	-65.7181	-63.6144	-64.7879
1980	-62.7007	-65.7411	-63.6079	-64.7682
1981	-62.6283	-65.7214	-63.6342	-64.7747
1982	-62.5889	-65.7345	-63.6638	-64.7682
1983	-62.6579	-65.7937	-63.6868	-64.7879
1984	-62.5725	-65.8003	-63.6177	-64.7978
1985	-62.6415	-65.8627	-63.7098	-64.8569
1986	-62.6678	-65.8036	-63.6802	-64.8602
1987	-62.6744	-65.8726	-63.6802	-64.8734
1988	-62.6875	-65.8857	-63.6966	-64.8668
1989	-62.6711	-65.8759	-63.7755	-64.9095
1990	-62.6349	-65.9351	-63.8511	-64.9621
1991	-62.6283	-65.9088	-63.8478	-65.0508
1992	-62.6415	-65.9449	-63.7821	-64.9424
1993	-62.6612	-65.9679	-63.8445	-64.9424
1994	-62.704	-65.9909	-63.8412	-64.9358
1995	-62.6842	-65.9219	-63.8117	-64.9753
1996	-62.6579	-65.9975	-63.7656	-65.0015
1997	-62.6283	-66.06	-63.8182	-64.9095
[truncated: 21,004 more rows]
