# Supplementary material for: Hierarchical architecture of dopaminergic circuits enables second-order conditioning in Drosophila
Source: eLife journal article supplement (doi:10.7554/elife.79042), 2023-01-24
Supplement: fig3-figsupp2-data1 [file Figure_3-figure-supplement2C_Source_data.xlsx]

## Sheet: Sheet1
	OCT(CS+)				MCH(CS-)					OCT(CS-)				MCH(CS+)
	Pre		Post		Pre		Post			Pre		Post		Pre		Post
Time (x10^-4) (sec)	Mean	SEM	Mean	SEM	Mean	SEM	Mean	SEM	Time (x10^-4) (sec)	Mean	SEM	Mean	SEM	Mean	SEM	Mean	SEM
1	5.41773	0.884382	4.88429	1.27305	5.35348	1.64528	4.56743	2.18997	1	5.52364	1.41801	2.68947	1.76501	9.28374	0.86703	2.79388	1.82015
2	5.35019	0.878557	4.72577	1.22485	5.38621	1.65097	4.58346	2.1899	2	5.71748	1.48844	2.59252	1.77267	9.22104	0.897761	2.62813	1.7523
3	5.28331	0.879392	4.52442	1.18467	5.37283	1.64725	4.55827	2.17904	3	5.91353	1.57779	2.50121	1.78626	9.15752	0.901726	2.47849	1.68014
4	5.2152	0.883329	4.29054	1.15647	5.31508	1.6327	4.49751	2.15679	4	6.09781	1.68358	2.42031	1.80618	9.09387	0.868774	2.35474	1.60881
5	5.14369	0.888702	4.0367	1.14222	5.22116	1.60885	4.4081	2.12256	5	6.26081	1.80274	2.35266	1.83104	9.03187	0.797844	2.2637	1.54352
6	5.06736	0.896252	3.77642	1.14062	5.10473	1.58036	4.29747	2.076	6	6.39799	1.93078	2.29829	1.85742	8.97472	0.696118	2.20893	1.48931
7	4.98641	0.908617	3.5229	1.14717	4.98314	1.5544	4.17304	2.01751	7	6.50919	2.06106	2.25424	1.88021	8.92724	0.578632	2.19077	1.45075
8	4.90336	0.929123	3.2881	1.15588	4.87479	1.53918	4.04179	1.94853	8	6.59701	2.18491	2.21524	1.89334	8.89562	0.469076	2.20693	1.43171
9	4.82298	0.960274	3.08198	1.16159	4.79637	1.54226	3.9099	1.87166	9	6.6649	2.29252	2.17515	1.89094	8.88673	0.399504	2.25328	1.43517
10	4.75165	1.00252	2.91206	1.16175	4.76031	1.56907	3.78229	1.7904	10	6.71516	2.37454	2.12877	1.86852	8.90707	0.394391	2.32469	1.46308
11	4.69614	1.05373	2.78294	1.15691	4.77298	1.62204	3.66227	1.70849	11	6.74782	2.42371	2.07346	1.82398	8.96154	0.441921	2.41579	1.51612
12	4.662	1.10964	2.69599	1.14971	4.83403	1.7003	3.5515	1.62921	12	6.76045	2.43616	2.01013	1.75824	9.05256	0.508991	2.52146	1.59335
13	4.6522	1.16468	2.6491	1.14293	4.93688	1.79985	3.45015	1.55464	13	6.74909	2.41221	1.94334	1.67513	9.17961	0.573126	2.637	1.69205
14	4.66607	1.21306	2.63666	1.13765	5.07022	1.91406	3.35755	1.48545	14	6.70995	2.35629	1.88044	1.5809	9.33944	0.627065	2.758	1.80773
15	4.69912	1.24961	2.64992	1.13256	5.22006	2.03432	3.27285	1.4211	15	6.64136	2.27615	1.83012	1.48325	9.52671	0.673851	2.88011	1.93454
16	4.7436	1.2704	2.67782	1.12479	5.37198	2.15101	3.19571	1.36047	16	6.54529	2.18149	1.80065	1.39029	9.73493	0.722225	2.9987	2.06586
17	4.7899	1.2732	2.70819	1.11167	5.51292	2.25441	3.12667	1.30256	17	6.42801	2.08217	1.79825	1.30952	9.95732	0.781813	3.10884	2.19498
18	4.82837	1.25801	2.72931	1.09228	5.63234	2.33561	3.06699	1.24722	18	6.29963	1.98671	1.82598	1.247	10.1874	0.858272	3.20545	2.31578
19	4.85128	1.22737	2.73148	1.06813	5.72266	2.38738	3.01824	1.19568	19	6.17272	1.90128	1.88308	1.20658	10.4191	0.950693	3.2838	2.42331
20	4.85436	1.1867	2.70836	1.0428	5.77911	2.40491	2.98159	1.15083	20	6.06045	1.82954	1.96507	1.18927	10.6465	1.0527	3.34015	2.51415
21	4.83775	1.14391	2.65796	1.02089	5.79934	2.38652	2.95732	1.11699	21	5.97468	1.77307	2.06417	1.19305	10.8635	1.15573	3.37232	2.58654
22	4.80588	1.10826	2.58298	1.0066	5.78303	2.33397	2.94453	1.09898	22	5.92476	1.73202	2.17024	1.21314	11.0633	1.25215	3.38008	2.64018
23	4.76641	1.088	2.49051	1.00281	5.73169	2.25231	2.94141	1.10055	23	5.91696	1.70552	2.27189	1.24273	11.2383	1.337	3.36513	2.67583
24	4.7284	1.08778	2.3911	1.01079	5.64866	2.14897	2.94574	1.12262	24	5.95469	1.6918	2.3578	1.27393	11.38	1.40822	3.33075	2.69474
25	4.70007	1.10712	2.29737	1.03065	5.53916	2.0326	2.95545	1.16261	25	6.03906	1.68816	2.41804	1.29883	11.4795	1.46583	3.28121	2.69816
26	4.68677	1.14114	2.22219	1.06217	5.41011	1.91166	2.96912	1.21522	26	6.16927	1.69115	2.4453	1.3106	11.5285	1.51043	3.22109	2.6869
27	4.68958	1.1829	2.17684	1.10525	5.26964	1.79357	2.98597	1.27403	27	6.34262	1.697	2.43584	1.30448	11.52	1.54205	3.15481	2.66135
28	4.70502	1.22568	2.16918	1.1599	5.12622	1.68447	3.0057	1.3329	28	6.55385	1.70228	2.3899	1.27839	11.4494	1.55969	3.08632	2.62158
29	4.72586	1.26434	2.2023	1.22567	4.98752	1.58929	3.02791	1.38675	29	6.79425	1.7046	2.31174	1.23303	11.3147	1.56171	3.01898	2.56774
30	4.74292	1.29575	2.27378	1.30104	4.85942	1.51177	3.05177	1.43158	30	7.0509	1.70297	2.20903	1.17133	11.1172	1.54683	2.95572	2.50046
31	4.74748	1.31875	2.3758	1.38285	4.74528	1.45392	3.07581	1.46429	31	7.30669	1.69789	2.09196	1.09752	10.8618	1.51506	2.89912	2.42124
32	4.73348	1.33382	2.49608	1.46614	4.64593	1.41525	3.09819	1.48242	32	7.54146	1.69097	1.97213	1.0165	10.5565	1.46837	2.85152	2.33268
33	4.69914	1.34267	2.61966	1.54435	4.56026	1.3925	3.11718	1.48433	33	7.73437	1.68426	1.86137	0.933717	10.2122	1.41106	2.81509	2.23854
34	4.64741	1.34782	2.731	1.60997	4.48626	1.38035	3.13183	1.46956	34	7.86708	1.67958	1.7706	0.855867	9.8426	1.34992	2.79169	2.14359
35	4.58514	1.35226	2.81635	1.65557	4.42225	1.37305	3.1424	1.43936	35	7.92698	1.67792	1.70885	0.79184	9.46311	1.29365	2.78276	2.05324
36	4.52122	1.35941	2.8657	1.67495	4.36783	1.36604	3.15041	1.39723	36	7.90981	1.67934	1.68233	0.752442	9.09004	1.25133	2.78906	1.9729
37	4.46412	1.37279	2.87414	1.66445	4.32426	1.35706	3.15823	1.34889	37	7.8208	1.68311	1.69372	0.747149	8.73916	1.22961	2.81048	1.90719
38	4.41954	1.39524	2.84235	1.62379	4.29418	1.3463	3.16826	1.30166	38	7.674	1.68791	1.74163	0.778542	8.42416	1.23	2.8458	1.85913
39	4.3889	1.42753	2.77629	1.55666	4.28077	1.33571	3.18186	1.26304	39	7.49004	1.69206	1.82041	0.839579	8.15491	1.24811	2.89269	1.82955
40	4.36891	1.46701	2.6861	1.47051	4.28652	1.32766	3.19855	1.23878	40	7.29263	1.69349	1.92044	0.91676	7.93593	1.27591	2.94779	1.81709
41	4.35256	1.50738	2.58449	1.37582	4.31215	1.32354	3.21553	1.23123	41	7.10472	1.69004	2.02897	0.995317	7.76553	1.30529	3.00701	1.81867
42	4.33093	1.54006	2.48496	1.28472	4.35598	1.32281	3.22796	1.23873	42	6.94507	1.67987	2.13148	1.06246	7.63569	1.3309	3.06608	1.83033
43	4.29547	1.55656	2.39999	1.20908	4.41383	1.32305	3.22986	1.25652	43	6.82598	1.66233	2.21343	1.1086	7.53309	1.35115	3.12107	1.84814
44	4.23989	1.55084	2.33951	1.15823	4.47962	1.32093	3.21556	1.27851	44	6.75247	1.63874	2.26223	1.12766	7.44112	1.36749	3.16891	1.86888
45	4.16122	1.5209	2.3099	1.13698	4.54636	1.31356	3.18129	1.29912	45	6.72293	1.61283	2.26902	1.11714	7.34258	1.38254	3.20768	1.89038
46	4.05987	1.46899	2.31334	1.14474	4.60721	1.29951	3.12656	1.31461	46	6.73079	1.59048	2.22999	1.078	7.22265	1.39808	3.23669	1.91157
47	3.93869	1.40069	2.34787	1.1765	4.65638	1.2793	3.05483	1.32373	47	6.76675	1.57828	2.14704	1.01431	7.07144	1.41387	3.25622	1.93227
48	3.80179	1.32321	2.40774	1.22485	4.6896	1.25529	2.97326	1.32774	48	6.82086	1.58138	2.0276	0.932737	6.88573	1.42794	3.26707	1.9528
49	3.65335	1.24337	2.48432	1.2819	4.70423	1.23107	2.89158	1.3298	49	6.8841	1.60135	1.8837	0.841706	6.66934	1.43806	3.27017	1.97363
50	3.49716	1.1661	2.56721	1.34045	4.69901	1.21077	2.82014	1.33394	50	6.94915	1.63547	1.73034	0.750415	6.43217	1.44347	3.26618	1.99501
51	3.33694	1.09393	2.64554	1.39452	4.67371	1.19841	2.76781	1.34372	51	7.01031	1.67795	1.58365	0.667828	6.18805	1.44594	3.25542	2.01679
52	3.17728	1.02758	2.70929	1.43953	4.62885	1.19719	2.74015	1.36112	52	7.06294	1.72227	1.45895	0.601907	5.95202	1.44959	3.23814	2.03845
53	3.02488	0.967132	2.75047	1.47245	4.56553	1.20881	2.73834	1.38588	53	7.10273	1.76347	1.36914	0.559207	5.73762	1.45944	3.21487	2.05918
54	2.88959	0.913412	2.76405	1.49179	4.4854	1.23291	2.75924	1.41547	54	7.12504	1.79934	1.32351	0.544619	5.55482	1.47934	3.18691	2.07812
55	2.78476	0.869118	2.74849	1.49762	4.39069	1.26682	2.79645	1.44569	55	7.12485	1.83033	1.32714	0.560718	5.40901	1.51026	3.1566	2.09453
56	2.72678	0.839895	2.70578	1.4914	4.28424	1.30596	2.84215	1.47155	56	7.09725	1.85847	1.38078	0.606771	5.30113	1.54978	3.12723	2.10793
57	2.73368	0.83501	2.64099	1.47579	4.16951	1.34468	2.88917	1.48815	57	7.03835	1.8859	1.4811	0.678453	5.22874	1.59297	3.10258	2.11805
58	2.823	0.866276	2.5614	1.45423	4.0505	1.37729	2.93278	1.49147	58	6.94657	1.91385	1.62124	0.768776	5.18756	1.63391	3.08604	2.12482
59	3.00927	0.943806	2.47531	1.43038	3.93172	1.39896	2.97156	1.47893	59	6.82357	1.94231	1.79147	0.869495	5.17294	1.66735	3.07968	2.12825
60	3.30134	1.07053	2.39077	1.40759	3.81799	1.40642	3.00736	1.44963	60	6.67486	1.97064	1.97993	0.972296	5.18085	1.68979	3.08345	2.12838
61	3.70017	1.24021	2.31436	1.38826	3.71422	1.39823	3.04416	1.40428	61	6.50948	1.99846	2.1735	1.06963	5.20819	1.70011	3.09478	2.12532
62	4.19737	1.43985	2.25032	1.37343	3.62505	1.37494	3.08637	1.34501	62	6.33904	2.02637	2.35868	1.15525	5.25251	1.69947	3.10877	2.11928
63	4.77505	1.6534	2.20005	1.36261	3.55433	1.33896	3.13711	1.27493	63	6.1761	2.05597	2.5227	1.22458	5.31148	1.69081	3.11897	2.11056
64	5.40704	1.86462	2.1622	1.35391	3.50458	1.29435	3.19678	1.19786	64	6.03247	2.08924	2.65454	1.2748	5.38236	1.67785	3.11855	2.09952
65	6.06173	2.05929	2.13321	1.34448	3.47645	1.24619	3.26266	1.11802	65	5.91754	2.12749	2.74606	1.30483	5.46198	1.66401	3.10167	2.08651
66	6.7058	2.22671	2.10831	1.33103	3.46847	1.19979	3.32933	1.03991	66	5.83724	2.17035	2.79288	1.31522	5.54715	1.65173	3.06467	2.07178
67	7.30879	2.36074	2.08266	1.31058	3.47711	1.15967	3.39008	0.968254	67	5.79364	2.21554	2.79499	1.30791	5.63567	1.6426	3.00687	2.0554
68	7.84703	2.45998	2.05255	1.28106	3.49728	1.12875	3.43865	0.907841	68	5.78519	2.25934	2.75695	1.28593	5.72728	1.63834	2.93074	2.03722
69	8.30648	2.52727	2.01637	1.24193	3.52327	1.10808	3.471	0.863109	69	5.80762	2.2978	2.68768	1.25305	5.82446	1.6421	2.84159	2.01683
70	8.68387	2.56841	1.97524	1.19448	3.54981	1.09738	3.48651	0.837523	70	5.85519	2.328	2.59997	1.21352	5.93255	1.65915	2.74679	1.99369
71	8.9859	2.59077	1.9333	1.14194	3.57325	1.09599	3.48855	0.832919	71	5.92225	2.34887	2.50968	1.17187	6.05915	1.69613	2.65479	1.96725
72	9.22721	2.60188	1.89796	1.08922	3.59241	1.1037	3.48408	0.849258	72	6.00505	2.36131	2.43517	1.13286	6.21276	1.75868	2.57434	1.9374
73	9.42779	2.60862	1.88013	1.0425	3.60916	1.12097	3.48288	0.88497	73	6.10386	2.36765	2.39691	1.1017	6.40144	1.84861	2.51385	1.9048
74	9.61118	2.61704	1.89493	1.0087	3.62852	1.14864	3.49649	0.937562	74	6.22541	2.3708	2.4179	1.08438	6.63169	1.96229	2.48146	1.87133
75	9.80445	2.63254	1.96302	0.99529	3.65861	1.18755	3.53755	1.00397	75	6.38587	2.37355	2.52497	1.08793	6.90862	2.09112	2.4856	1.84033
76	10.0404	2.66007	2.11235	1.01066	3.71047	1.23867	3.61968	1.08055	76	6.61429	2.37823	2.75136	1.1204	7.23771	2.22323	2.53632	1.81652
77	10.362	2.70419	2.38012	1.06503	3.79819	1.30382	3.75828	1.16317	77	6.95625	2.3868	3.14039	1.19	7.62853	2.34542	2.6473	1.80571
78	10.8277	2.76926	2.81429	1.1714	3.93932	1.38684	3.97185	1.24811	78	7.47727	2.40112	3.74972	1.30395	8.09999	2.44438	2.83842	1.81441
79	11.5165	2.86025	3.47365	1.34541	4.15563	1.49446	4.28378	1.33473	79	8.26485	2.42304	4.65526	1.46769	8.68639	2.50765	3.13864	1.84993
80	12.5298	2.98501	4.4257	1.60353	4.47406	1.63628	4.72397	1.42997	80	9.42811	2.45429	5.95294	1.68499	9.44285	2.52459	3.58864	1.9213
81	13.9889	3.15738	5.74142	1.96051	4.92727	1.82334	5.32983	1.55359	81	11.0933	2.49593	7.75655	1.95847	10.4484	2.48799	4.24233	2.04059
82	16.0259	3.39911	7.48673	2.42726	5.55375	2.06578	6.14612	1.73963	82	13.3943	2.5474	10.1899	2.2893	11.805	2.39675	5.16642	2.22329
83	18.7681	3.73741	9.71101	3.00933	6.39683	2.37062	7.22335	2.02755	83	16.4568	2.60569	13.3724	2.67511	13.6314	2.2601	6.43685	2.48581
84	22.3178	4.19644	12.4341	3.7057	7.50282	2.74075	8.61467	2.44441	84	20.3788	2.66511	17.3988	3.10658	16.0514	2.10348	8.13174	2.83968
85	26.73	4.78607	15.6337	4.5075	8.91817	3.17507	10.3714	2.99177	85	25.2074	2.71855	22.315	3.56423	19.1771	1.97392	10.3208	3.28485
86	31.9915	5.49452	19.2372	5.39707	10.6862	3.669	12.5377	3.64551	86	30.9187	2.7611	28.0952	4.01731	23.0898	1.93475	13.0526	3.80533
87	38.0075	6.28841	23.1187	6.34756	12.8435	4.21435	15.1452	4.36266	87	37.403	2.79558	34.6244	4.42615	27.8207	2.03396	16.3405	4.36849
88	44.5992	7.11859	27.1056	7.32377	15.4167	4.79829	18.2075	5.0895	88	44.4618	2.83866	41.6921	4.74846	33.3361	2.26429	20.1518	4.92771
89	51.5136	7.92839	30.9935	8.28416	18.4194	5.40192	21.7164	5.77033	89	51.8181	2.92307	49.0009	4.94828	39.5294	2.56705	24.401	5.42736
90	58.447	8.66195	34.5685	9.18431	21.8493	5.99947	25.6385	6.35824	90	59.1407	3.08967	56.1912	5.00602	46.2238	2.86963	28.95	5.80974
91	65.077	9.27133	37.6319	9.98117	25.6856	6.55922	29.9133	6.82785	91	66.0791	3.36786	62.8774	4.92656	53.1828	3.11195	33.6162	6.02305
92	71.1004	9.72209	40.0263	10.6379	29.8866	7.04665	34.4532	7.18772	92	72.3043	3.75679	68.6934	4.74289	60.1335	3.2569	38.188	6.0295
93	76.2679	9.99647	41.653	11.128	34.3884	7.42983	39.1446	7.48721	93	77.5468	4.2237	73.3367	4.51156	66.7923	3.29528	42.4455	5.81248
94	80.4107	10.0942	42.4819	11.4382	39.104	7.6859	43.8512	7.80972	94	81.6257	4.71796	76.6043	4.29744	72.8939	3.24946	46.1823	5.38199
95	83.4551	10.031	42.5502	11.5699	43.9253	7.8075	48.4213	8.24509	95	84.4647	5.18752	78.4134	4.14898	78.2177	3.1742	49.2269	4.77856
96	85.4226	9.83518	41.9511	11.5378	48.7277	7.80716	52.6966	8.848	96	86.0922	5.59015	78.8057	4.07658	82.6062	3.14802	51.458	4.07743
97	86.4165	9.5432	40.8167	11.3675	53.378	7.71807	56.5257	9.60874	97	86.6266	5.89913	77.9324	4.05179	85.975	3.24554	52.8145	3.39559
98	86.5997	9.19429	39.297	11.0915	57.7449	7.58938	59.7781	10.4582	98	86.2523	6.10478	76.0272	4.029	88.3128	3.49815	53.2966	2.89535
99	86.1672	8.82577	37.5408	10.7444	61.711	7.47538	62.3582	11.299	99	85.1898	6.21296	73.3709	3.97019	89.6729	3.87936	52.9606	2.73436
100	85.3192	8.46914	35.6806	10.3593	65.1844	7.42032	64.2158	12.0379	100	83.6674	6.24152	70.2558	3.8575	90.1585	4.32933	51.909	2.92451
101	84.239	8.14772	33.8234	9.96449	68.1075	7.44476	65.3518	12.6072	101	81.8972	6.21549	66.9542	3.69285	89.906	4.78698	50.2759	3.30879
102	83.0776	7.87579	32.0475	9.58191	70.462	7.54091	65.8171	12.9724	102	80.0587	6.16204	63.6957	3.49084	89.0672	5.20634	48.2125	3.71806
103	81.9473	7.65929	30.4041	9.2266	72.2681	7.67975	65.7044	13.1317	103	78.2906	6.10595	60.6549	3.27055	87.7958	5.55994	45.8724	4.04901
104	80.9207	7.49737	28.9217	8.90739	73.5793	7.82467	65.1361	13.1086	104	76.6896	6.06642	57.9479	3.04944	86.2354	5.83692	43.3994	4.25336
105	80.0364	7.38447	27.6122	8.6279	74.4728	7.94392	64.2483	12.9438	105	75.3136	6.05546	55.6362	2.84075	84.5132	6.03951	40.9177	4.31705
106	79.307	7.31227	26.4762	8.38782	75.0385	8.01757	63.1758	12.6852	106	74.1889	6.07791	53.7353	2.65386	82.7362	6.1791	38.5262	4.24709
107	78.7276	7.27137	25.5076	8.18397	75.3677	8.03897	62.0394	12.3798	107	73.3167	6.13274	52.2258	2.49608	80.99	6.2724	36.2959	4.06399
108	78.2834	7.25251	24.6958	8.01117	75.5439	8.01268	60.9368	12.0686	108	72.681	6.21491	51.0644	2.37396	79.3395	6.33795	34.2705	3.7972
109	77.9552	7.24747	24.0281	7.86296	75.6363	7.95067	59.9383	11.7827	109	72.2534	6.31731	50.1943	2.29312	77.8301	6.39324	32.4702	3.4822
110	77.7228	7.24967	23.4905	7.73207	75.6966	7.86826	59.0866	11.5425	110	71.9983	6.4322	49.5542	2.25663	76.4899	6.45274	30.8963	3.15835
111	77.5661	7.25447	23.0684	7.61094	75.7585	7.78036	58.3999	11.3585	111	71.876	6.55216	49.0853	2.2635	75.3307	6.52675	29.5376	2.86617
112	77.4657	7.25923	22.7472	7.49226	75.8401	7.69881	57.8757	11.2329	112	71.8456	6.67043	48.7362	2.30834	74.3509	6.62105	28.3751	2.64237
113	77.4025	7.26309	22.5127	7.36958	75.9462	7.63093	57.4972	11.1615	113	71.8671	6.78099	48.4664	2.38252	73.5367	6.73708	27.3868	2.5115
114	77.3578	7.26643	22.352	7.23809	76.0726	7.57932	57.2376	11.136	114	71.9038	6.87856	48.2475	2.47611	72.8652	6.87232	26.5502	2.4776
115	77.3139	7.27021	22.2526	7.09532	76.2099	7.54266	57.0648	11.1458	115	71.9235	6.95874	48.0625	2.57935	72.3073	7.0209	25.8439	2.52366
116	77.2554	7.27527	22.2029	6.94167	76.3466	7.51708	56.945	11.1792	116	71.9006	7.01841	47.9037	2.68337	71.8312	7.17441	25.2478	2.62138
117	77.1703	7.28159	22.1918	6.78058	76.4723	7.49768	56.8457	11.2252	117	71.817	7.05623	47.7692	2.78049	71.406	7.32303	24.7425	2.74323
118	77.0514	7.28792	22.2085	6.61811	76.5797	7.47982	56.7379	11.2738	118	71.6623	7.07308	47.6599	2.86443	71.0043	7.45693	24.3096	2.86915
119	76.8968	7.2917	22.2429	6.46194	76.6654	7.46002	56.5977	11.317	119	71.4345	7.07221	47.5758	2.93068	70.6053	7.56772	23.9317	2.98782
120	76.7099	7.28943	22.2863	6.32002	76.73	7.43623	56.4077	11.3486	120	71.1388	7.05894	47.515	2.97688	70.1956	7.6497	23.5924	3.09512
121	76.4981	7.27734	22.3319	6.199	76.7771	7.40764	56.1579	11.3646	121	70.7875	7.03985	47.472	3.00302	69.7694	7.70062	23.2776	3.19198
122	76.2716	7.2523	22.375	6.10299	76.8109	7.37397	55.8452	11.3631	122	70.3976	7.02182	47.4391	3.01128	69.3276	7.72179	22.976	3.28223
123	76.0415	7.21267	22.4131	6.03282	76.8351	7.33477	55.4734	11.3447	123	69.9902	7.01103	47.4076	3.0054	68.8763	7.71747	22.6796	3.37077
124	75.818	7.15892	22.4453	5.98603	76.8507	7.28875	55.0513	11.3121	124	69.5875	7.0121	47.3697	2.98979	68.424	7.69381	22.3844	3.46198
125	75.6093	7.09376	22.4709	5.95752	76.8559	7.23373	54.5912	11.2703	125	69.2118	7.0278	47.32	2.96874	67.9802	7.65759	22.0899	3.55848
126	75.421	7.02188	22.4889	5.94074	76.8455	7.167	54.1072	11.2256	126	68.8828	7.05899	47.2569	2.94579	67.5528	7.61503	21.7993	3.66044
127	75.2552	6.9491	22.4965	5.92906	76.8127	7.0861	53.6127	11.1853	127	68.6163	7.10501	47.1827	2.9235	67.148	7.57094	21.5192	3.76541
128	75.1116	6.88143	22.4895	5.91704	76.7498	6.98968	53.1195	11.1557	128	68.4229	7.16416	47.1034	2.90335	66.769	7.52841	21.258	3.86893
129	74.987	6.8241	22.4622	5.90129	76.6501	6.87823	52.6365	11.1418	129	68.3073	7.2342	47.0278	2.88579	66.4167	7.48889	21.0254	3.96558
130	74.8767	6.78084	22.4087	5.8808	76.5079	6.7544	52.1692	11.146	130	68.2681	7.3127	46.9659	2.87044	66.0902	7.45265	20.83	4.05044
131	74.7742	6.75368	22.3237	5.85663	76.3195	6.62276	51.7201	11.168	131	68.298	7.39722	46.9273	2.85633	65.7877	7.41939	20.6777	4.1205
132	74.6725	6.74303	22.2045	5.83113	76.0826	6.48927	51.289	11.2052	132	68.3843	7.48528	46.9193	2.84247	65.5074	7.38884	20.5697	4.1755
133	74.5639	6.74808	22.0514	5.80686	75.7958	6.36029	50.874	11.2534	133	68.5103	7.57433	46.9456	2.82842	65.2479	7.3612	20.5021	4.21815
134	74.441	6.76721	21.8681	5.78552	75.4587	6.24171	50.4727	11.3073	134	68.6558	7.66161	47.0047	2.81479	65.0079	7.33736	20.4651	4.25329
135	74.2978	6.79841	21.6615	5.76728	75.0716	6.13812	50.0825	11.3617	135	68.7992	7.74416	47.0899	2.80335	64.7866	7.31882	20.4443	4.28643
136	74.1302	6.83945	21.441	5.75064	74.6368	6.05233	49.7018	11.4117	136	68.9188	7.81877	47.1896	2.79653	64.5825	7.30746	20.4227	4.32191
137	73.9371	6.88798	21.2171	5.73291	74.1584	5.98533	49.3302	11.4532	137	68.9951	7.88222	47.2894	2.79664	64.3934	7.30508	20.3822	4.3615
138	73.7207	6.94151	20.9997	5.71101	73.6437	5.93663	48.9687	11.4832	138	69.0127	7.9315	47.374	2.80498	64.2157	7.31296	20.3068	4.40379
139	73.4867	6.99743	20.7974	5.68234	73.1027	5.90489	48.6196	11.4995	139	68.9619	7.96421	47.4307	2.82153	64.0448	7.33142	20.1832	4.4446
140	73.2429	7.05293	20.6155	5.64531	72.5481	5.88854	48.2861	11.5012	140	68.8402	7.97889	47.4514	2.84534	63.8756	7.35969	20.0027	4.47808
141	72.9981	7.10512	20.4561	5.59955	71.9938	5.88642	47.9716	11.4882	141	68.6523	7.9753	47.4343	2.87545	63.7027	7.39596	19.7608	4.49808
142	72.7607	7.15107	20.3179	5.54587	71.4542	5.89796	47.6793	11.461	142	68.4091	7.9545	47.3839	2.9119	63.5217	7.43772	19.4575	4.49931
143	72.5372	7.18799	20.196	5.48597	70.9427	5.9231	47.411	11.4209	143	68.1262	7.91876	47.3098	2.95609	63.3297	7.48225	19.0957	4.47808
144	72.3314	7.21335	20.0839	5.42215	70.4713	5.96189	47.1664	11.3694	144	67.8213	7.87146	47.224	3.01041	63.1256	7.52716	18.6808	4.4326
145	72.1443	7.22509	19.9741	5.35689	70.0499	6.01394	46.9427	11.3086	145	67.5121	7.8167	47.1379	3.07712	62.9099	7.57073	18.2197	4.36274
146	71.9742	7.22192	19.8602	5.29244	69.6857	6.078	46.7345	11.241	146	67.2136	7.75903	47.0601	3.1571	62.6841	7.61202	17.7205	4.26962
147	71.8171	7.2035	19.738	5.23043	69.3831	6.15173	46.5341	11.1695	147	66.9379	7.70299	46.9948	3.24904	62.45	7.65072	17.1925	4.15516
148	71.6673	7.17069	19.6062	5.17158	69.1425	6.23176	46.333	11.0973	148	66.6927	7.65273	46.9419	3.34927	62.2084	7.68689	16.6466	4.0219
149	71.5172	7.12555	19.4664	5.11568	68.9597	6.31377	46.123	11.0273	149	66.4817	7.61154	46.8984	3.45213	61.9588	7.72074	16.0964	3.87341
150	71.3578	7.07124	19.3224	5.06199	68.8252	6.39275	45.8976	10.9623	150	66.305	7.58154	46.8602	3.55083	61.6994	7.75262	15.5576	3.71506
151	71.1787	7.01167	19.1785	5.00973	68.7236	6.46326	45.6533	10.9038	151	66.1595	7.56345	46.8238	3.63819	61.4274	7.78309	15.0483	3.55477
152	70.9693	6.95107	19.0376	4.95877	68.6346	6.51972	45.3898	10.8515	152	66.0394	7.55645	46.787	3.70761	61.1401	7.8131	14.5868	3.40278
153	70.7194	6.89341	18.8996	4.91007	68.5341	6.55684	45.1101	10.8025	153	65.936	7.55826	46.7487	3.75381	60.8365	7.84393	14.1896	3.27004
154	70.4211	6.84189	18.7607	4.86585	68.3972	6.57026	44.8184	10.7514	154	65.8386	7.56532	46.7075	3.77366	60.5181	7.87672	13.8688	3.16519
155	70.0704	6.79838	18.6136	4.82931	68.2007	6.55702	44.519	10.6901	155	65.7349	7.57321	46.6601	3.76677	60.1892	7.912	13.6297	3.09143
156	69.6687	6.76316	18.4492	4.80401	67.9263	6.51613	44.2141	10.6091	156	65.6125	7.57719	46.5997	3.73564	59.8565	7.94898	13.4696	3.04494
157	69.2232	6.73484	18.2584	4.79312	67.5629	6.44873	43.9026	10.4986	157	65.46	7.57273	46.5166	3.68532	59.5279	7.98527	13.378	3.01629
158	68.7472	6.71069	18.0346	4.79865	67.108	6.35809	43.5792	10.3503	158	65.2695	7.55606	46.3988	3.6226	59.2107	8.01695	13.3387	2.99388
159	68.2584	6.68729	17.7756	4.8209	66.5681	6.24923	43.2352	10.1588	159	65.0377	7.52452	46.2347	3.55479	58.9101	8.03909	13.333	2.96783
160	67.7768	6.66139	17.4841	4.85804	65.9578	6.12845	42.86	9.92336	160	64.7671	7.47682	46.0165	3.4885	58.6278	8.04658	13.3427	2.93269
161	67.3222	6.63064	17.1677	4.90602	65.2975	6.00262	42.4437	9.64855	161	64.4665	7.41314	45.7418	3.42865	58.3623	8.0352	13.3538	2.88839
162	66.911	6.59415	16.8374	4.9586	64.6115	5.87845	41.9788	9.34392	162	64.1493	7.33518	45.4154	3.37795	58.1084	8.00251	13.3584	2.83971
163	66.554	6.55263	16.5048	5.00802	63.9245	5.76168	41.4624	9.02305	163	63.8321	7.24603	45.0484	3.3368	57.8588	7.94856	13.3552	2.79469
164	66.2553	6.50816	16.181	5.04593	63.2589	5.65641	40.8974	8.70183	164	63.5316	7.1499	44.6556	3.30361	57.6053	7.87614	13.3491	2.76223
165	66.0122	6.4637	15.8743	5.06485	62.6322	5.56445	40.2914	8.39597	165	63.2615	7.05165	44.2526	3.27513	57.3397	7.79036	13.3487	2.74955
166	65.8161	6.42249	15.5897	5.05952	62.0553	5.48518	39.656	8.11879	166	63.0299	6.95627	43.8525	3.24681	57.0553	7.69784	13.3645	2.75992
167	65.6548	6.38751	15.3294	5.02792	61.5314	5.41568	39.0043	7.87929	167	62.8374	6.86844	43.4633	3.2132	56.7471	7.6055	13.4053	2.79145
168	65.5145	6.36107	15.0928	4.97154	61.0569	5.35144	38.3491	7.68127	168	62.6769	6.79208	43.0877	3.16844	56.4129	7.51932	13.4768	2.83751
169	65.3826	6.3446	14.8786	4.89491	60.6228	5.28737	37.7008	7.52335	169	62.5346	6.73008	42.7236	3.10694	56.0529	7.4434	13.579	2.88833
170	65.2487	6.3385	14.685	4.80463	60.2169	5.21895	37.0668	7.40014	170	62.3919	6.68395	42.3666	3.02453	55.6698	7.3796	13.7055	2.93343
171	65.1055	6.34208	14.5104	4.70814	59.8265	5.14317	36.4514	7.30386	171	62.2292	6.65345	42.0123	2.9197	55.2679	7.32764	13.8439	2.9639
172	64.9488	6.35354	14.3539	4.61268	59.4412	5.05904	35.8563	7.22617	172	62.0291	6.63645	41.6589	2.79487	54.8529	7.28574	13.976	2.97408
173	64.7767	6.36998	14.2148	4.52463	59.0539	4.96753	35.2824	7.15969	173	61.7789	6.62913	41.3087	2.65713	54.4299	7.25134	14.08	2.96229
174	64.588	6.38763	14.0923	4.4493	58.6621	4.87112	34.7303	7.09906	174	61.4728	6.6266	40.9679	2.51801	54.0036	7.22177	14.1333	2.93066
175	64.382	6.40224	13.9852	4.39085	58.2676	4.77297	34.2021	7.04142	175	61.1122	6.62389	40.6457	2.39173	53.5767	7.19463	14.1151	2.88409
176	64.1571	6.40976	13.8916	4.35242	57.8753	4.67625	33.7011	6.98636	176	60.7046	6.61696	40.3516	2.29186	53.1511	7.16787	14.0096	2.82888
177	63.9117	6.40699	13.809	4.33612	57.492	4.58367	33.2319	6.93532	177	60.2617	6.60356	40.0932	2.22692	52.7273	7.13983	13.8089	2.77126
178	63.6441	6.3923	13.7346	4.34289	57.1253	4.49738	32.7995	6.89082	178	59.7971	6.58349	39.8738	2.1971	52.3062	7.10909	13.5142	2.71616
179	63.3534	6.36605	13.6655	4.37221	56.7816	4.41901	32.4075	6.8554	179	59.3238	6.55846	39.691	2.19397	51.8895	7.07468	13.1359	2.66653
180	63.04	6.33068	13.5989	4.42164	56.4657	4.34983	32.0567	6.83079	180	58.8529	6.5313	39.5365	2.20346	51.4796	7.03619	12.6923	2.62299
181	62.7057	6.29046	13.5321	4.48638	56.1791	4.29079	31.7445	6.81721	181	58.3924	6.50513	39.397	2.21011	51.0794	6.99408	12.2066	2.58386
182	62.3528	6.25083	13.4623	4.55914	55.9194	4.24246	31.4638	6.81309	182	57.9472	6.48237	39.256	2.2007	50.6904	6.94975	11.703	2.54547
183	61.9828	6.21741	13.3861	4.63067	55.6793	4.20487	31.2043	6.81517	183	57.5193	6.46411	39.0957	2.16654	50.3118	6.90541	11.204	2.50281
184	61.5949	6.19502	13.2997	4.69082	55.4465	4.17743	30.9536	6.819	184	57.1079	6.44982	38.8991	2.10483	49.9388	6.86366	10.7268	2.45034
185	61.1845	6.18665	13.1985	4.73	55.2036	4.15892	30.6988	6.81967	185	56.7096	6.43738	38.6512	2.01935	49.5623	6.82698	10.2818	2.38308
186	60.7431	6.1928	13.0773	4.74058	54.9295	4.14745	30.4283	6.81257	186	56.3178	6.4235	38.3396	1.92008	49.1694	6.79735	9.87259	2.2976
187	60.2583	6.21128	12.9315	4.71791	54.6014	4.1404	30.1323	6.79403	187	55.9232	6.40421	37.9548	1.8213	48.7445	6.77608	9.49598	2.19279
188	59.7151	6.23754	12.7571	4.66072	54.1972	4.13422	29.8029	6.76159	188	55.513	6.37557	37.4896	1.73766	48.2712	6.76368	9.14369	2.07014
189	59.0983	6.26538	12.5525	4.57101	53.6979	4.12448	29.4323	6.71371	189	55.072	6.33435	36.9381	1.67878	47.7334	6.75966	8.80404	1.93351
190	58.3939	6.28802	12.3179	4.45346	53.0895	4.10601	29.0119	6.64929	190	54.5834	6.27847	36.2951	1.64508	47.1159	6.76217	8.46359	1.78838
191	57.5912	6.29915	12.0561	4.31471	52.3631	4.07334	28.5299	6.56694	191	54.0301	6.20717	35.555	1.62814	46.4047	6.76746	8.10892	1.64094
192	56.6834	6.29368	11.7715	4.16237	51.514	4.02143	27.9714	6.46455	192	53.3955	6.12059	34.712	1.61559	45.5855	6.7697	7.72798	1.49697
193	55.6678	6.26808	11.4694	4.00419	50.5398	3.94631	27.3186	6.33934	193	52.6648	6.01917	33.7595	1.59733	44.6434	6.7613	7.31138	1.36106
194	54.5448	6.22013	11.1552	3.84712	49.4372	3.8456	26.5531	6.18827	194	51.8242	5.90298	32.691	1.56961	43.5622	6.73371	6.85317	1.23617
195	53.3163	6.1484	10.8335	3.69653	48.2009	3.71873	25.6591	6.00891	195	50.862	5.77141	31.5011	1.53595	42.3257	6.67878	6.35172	1.12352
196	51.9849	6.05167	10.508	3.55552	46.8222	3.56679	24.6262	5.80009	196	49.7674	5.62311	30.1868	1.50525	40.9188	6.58982	5.80977	1.02264
197	50.5525	5.92854	10.1817	3.42459	45.2905	3.39229	23.4531	5.56257	197	48.5319	5.45643	28.7487	1.48818	39.3307	6.46253	5.2347	0.931659
198	49.0204	5.77749	9.8567	3.30162	43.5953	3.19874	22.148	5.29895	198	47.1495	5.26967	27.1927	1.49294	37.5575	6.29522	4.6378	0.847628
199	47.3903	5.5974	9.53526	3.18258	41.7303	2.99039	20.7295	5.01348	199	45.619	5.06137	25.5309	1.52232	35.6048	6.08873	4.0337	0.767197
200	45.6657	5.38827	9.21956	3.06264	39.6964	2.77192	19.2241	4.71133	200	43.9448	4.83032	23.7819	1.57346	33.4884	5.84583	3.43894	0.687452
201	43.8543	5.15191	8.9119	2.93768	37.5051	2.54838	17.6641	4.39796	201	42.1387	4.57574	21.9709	1.63984	31.2343	5.57065	2.87068	0.606755
202	41.9688	4.89213	8.61412	2.80539	35.1783	2.32492	16.0833	4.07847	202	40.2195	4.29748	20.128	1.71389	28.8762	5.26786	2.34491	0.525175
203	40.0285	4.61472	8.32715	2.6659	32.7485	2.10678	14.5148	3.75729	203	38.2129	3.99688	18.2872	1.78868	26.4536	4.9422	1.8751	0.444517
204	38.0578	4.32676	8.05035	2.52169	30.2554	1.89909	12.9881	3.43813	204	36.1493	3.67797	16.4833	1.85862	24.0086	4.59791	1.47092	0.36801
205	36.0843	4.0358	7.78104	2.37689	27.7417	1.70665	11.5271	3.12405	205	34.0613	3.34895	14.7495	1.9195	21.5825	4.23853	1.13742	0.300004
206	34.1361	3.7491	7.51456	2.23666	25.2494	1.53367	10.1505	2.81783	206	31.9813	3.02386	13.1151	1.96826	19.215	3.86709	0.874908	0.245922
207	32.2383	3.47303	7.24464	2.10632	22.8151	1.38294	8.87081	2.52206	207	29.9388	2.72342	11.6033	2.00284	16.9413	3.48657	0.679182	0.211779
208	30.4103	3.21291	6.96453	1.99073	20.4694	1.25513	7.69565	2.23936	208	27.9587	2.47422	10.23	2.02213	14.7928	3.10084	0.542377	0.201298
209	28.6643	2.97304	6.66821	1.89325	18.2343	1.1481	6.62783	1.97221	209	26.0606	2.30354	9.00342	2.02611	12.7949	2.71557	0.453982	0.211358
210	27.0054	2.75705	6.35209	1.81487	16.1256	1.05734	5.66656	1.72281	210	24.2587	2.2292	7.92446	2.01595	10.9677	2.33929	0.402152	0.233137
211	25.4328	2.56809	6.01618	1.7538	14.1534	0.97732	4.80785	1.49281	211	22.5627	2.2492	6.98772	1.99399	9.32407	1.98367	0.374933	0.257752
212	23.9424	2.40927	5.66507	1.70623	12.3252	0.903577	4.04577	1.28316	212	20.9797	2.34164	6.18325	1.96353	7.87015	1.66325	0.36145	0.278808
213	22.5295	2.28373	5.30784	1.66791	10.646	0.834319	3.37304	1.094	213	19.5141	2.47593	5.49805	1.92829	6.60439	1.39349	0.352826	0.292287
214	21.1908	2.19438	4.95738	1.63583	9.12082	0.771014	2.78228	0.924696	214	18.1702	2.62448	4.91807	1.89188	5.51869	1.18692	0.342816	0.296153
215	19.9255	2.14275	4.62863	1.6092	7.75358	0.717638	2.26643	0.774042	215	16.9504	2.76826	4.42941	1.85728	4.59916	1.04706	0.328068	0.290191
216	18.7354	2.12748	4.33657	1.58932	6.54741	0.678914	1.81942	0.640572	216	15.8558	2.89719	4.01946	1.8266	3.82847	0.964099	0.308015	0.27586
217	17.6231	2.14298	4.09382	1.57867	5.50323	0.658131	1.43601	0.522847	217	14.8841	3.00877	3.67715	1.80096	3.1877	0.918282	0.284413	0.255994
218	16.5912	2.17973	3.90886	1.57982	4.61927	0.655768	1.11172	0.419727	218	14.0291	3.10608	3.39298	1.78068	2.65868	0.889798	0.260647	0.234307
219	15.6393	2.22599	3.78484	1.59454	3.88984	0.669736	0.842237	0.330384	219	13.2792	3.19577	3.15844	1.76538	2.22534	0.866045	0.240903	0.214761
220	14.7638	2.27016	3.71953	1.6233	3.30529	0.696813	0.623116	0.254234	220	12.6188	3.28575	2.96559	1.75411	1.87467	0.842704	0.229361	0.200925
221	13.9574	2.30267	3.70631	1.66514	2.85178	0.733936	0.449402	0.190702	221	12.0294	3.38291	2.80649	1.7454	1.59665	0.821242	0.229517	0.195426
222	13.21	2.31708	3.73584	1.71808	2.51213	0.778585	0.315655	0.139055	222	11.4918	3.49113	2.67319	1.73737	1.38373	0.805817	0.243732	0.199604
223	12.5107	2.31048	3.79814	1.7797	2.26682	0.828573	0.21606	0.0982614	223	10.9896	3.61035	2.55785	1.72787	1.22975	0.800791	0.273023	0.213423
224	11.8495	2.28359	3.88439	1.84799	2.09566	0.881726	0.144813	0.06701	224	10.5109	3.73681	2.45326	1.71462	1.12891	0.809103	0.317107	0.235636
225	11.2186	2.24069	3.98815	1.92191	1.97941	0.935851	0.096484	0.0438847	225	10.0495	3.86438	2.35351	1.69549	1.07473	0.831436	0.374649	0.264221
226	10.6138	2.18911	4.10566	2.00153	1.90133	0.98892	0.0664032	0.0280629	226	9.60551	3.98611	2.2547	1.66883	1.05955	0.865977	0.44361	0.296973
227	10.0336	2.13788	4.23545	2.08775	1.84829	1.03941	0.0508945	0.0213809	227	9.18309	4.09587	2.15552	1.63384	1.07447	0.908591	0.521664	0.332153
228	9.47852	2.09534	4.37735	2.18152	1.81112	1.08655	0.0473912	0.0271183	228	8.78859	4.18927	2.0576	1.59095	1.10996	0.953309	0.606527	0.368963
229	8.94993	2.06646	4.53135	2.28317	1.78441	1.13046	0.054378	0.0422238	229	8.4277	4.26403	1.96551	1.54224	1.15695	0.993203	0.69619	0.407706
230	8.4486	2.05113	4.69674	2.39178	1.76558	1.17204	0.0712096	0.064392	230	8.10331	4.31992	1.88625	1.49157	1.20823	1.02157	0.78902	0.449523
231	7.97424	2.04472	4.87152	2.50493	1.7537	1.21269	0.0978217	0.0940393	231	7.81469	4.35817	1.82829	1.44449	1.25969	1.03323	0.883682	0.495783
232	7.52531	2.04055	5.05243	2.61882	1.74841	1.25391	0.134402	0.132089	232	7.55789	4.38097	1.80013	1.40758	1.3111	1.02566	0.979063	0.547419
233	7.09965	2.03288	5.23505	2.72858	1.74902	1.2969	0.181047	0.179116	233	7.32764	4.39091	1.80859	1.38746	1.36609	0.999748	1.07411	0.604458
234	6.69528	2.01873	5.4143	2.82907	1.75422	1.34235	0.237509	0.235053	234	7.11973	4.39067	1.85711	1.38938	1.43121	0.959997	1.16779	0.665909
235	6.31135	1.99812	5.58473	2.91579	1.76233	1.39036	0.303024	0.29905	235	6.9334	4.38281	1.94457	1.41584	1.51424	0.914308	1.2591	0.729855
236	5.94867	1.97297	5.74095	2.98599	1.77182	1.44069	0.376332	0.369524	236	6.77267	4.36959	2.06487	1.46576	1.62219	0.87323	1.34712	0.793673
237	5.60997	1.9457	5.87798	3.03937	1.78206	1.49314	0.455813	0.444318	237	6.64624	4.35289	2.20764	1.53442	1.75937	0.848443	1.43115	0.854236
238	5.29967	1.91838	5.9917	3.0782	1.79386	1.54801	0.539811	0.521055	238	6.56578	4.334	2.35996	1.61461	1.92618	0.850047	1.51077	0.908287
239	5.02342	1.89309	6.07941	3.10673	1.80956	1.6063	0.626961	0.597545	239	6.54327	4.31363	2.50884	1.69821	2.11867	0.883274	1.58583	0.952992
240	4.78739	1.87309	6.14041	3.13011	1.83272	1.66974	0.716571	0.672283	240	6.58781	4.292	2.6438	1.77794	2.32924	0.946775	1.65632	0.986757
241	4.59768	1.86429	6.17655	3.15326	1.86725	1.74028	0.808826	0.744842	241	6.70301	4.26899	2.75902	1.84864	2.54788	1.03386	1.72219	1.01004
242	4.45956	1.87561	6.19237	3.18028	1.91647	1.81949	0.904866	0.816156	242	6.88556	4.24427	2.85443	1.90773	2.76399	1.13532	1.78295	1.02577
243	4.3771	1.9177	6.19499	3.21435	1.9822	1.90773	1.00658	0.888503	243	7.12516	4.21728	2.93547	1.95493	2.96802	1.24165	1.83736	1.03874
244	4.35279	1.99978	6.19332	3.25792	2.06431	2.0037	1.11624	0.965238	244	7.40593	4.18723	3.01172	1.99133	3.15287	1.34434	1.88306	1.05382
245	4.38741	2.1264	6.19694	3.3127	2.16085	2.10426	1.23592	1.05019	245	7.70874	4.15311	3.09463	2.01833	3.31461	1.4365	1.91648	1.07335
246	4.48014	2.29599	6.21474	3.37932	2.26874	2.20494	1.36693	1.14696	246	8.01401	4.11385	3.19507	2.03691	3.45264	1.51341	1.93303	1.09535
247	4.62894	2.50211	6.2535	3.45677	2.38478	2.30069	1.50929	1.25817	247	8.30422	4.06878	3.32121	2.04753	3.56938	1.57281	1.92769	1.11373
248	4.83102	2.73613	6.31679	3.54215	2.50675	2.38699	1.66144	1.38492	248	8.56611	4.01796	3.4771	2.05054	3.66969	1.61483	1.89604	1.12049
249	5.08347	2.98966	6.40433	3.63073	2.63409	2.46071	1.82024	1.52648	249	8.79181	3.96246	3.66221	2.04694	3.76015	1.64159	1.83557	1.10859
250	5.38384	3.25609	6.51197	3.71665	2.76815	2.52083	1.98141	1.68018	250	8.97952	3.90417	3.87178	2.03879	3.84864	1.65638	1.74688	1.07425
251	5.73046	3.53097	6.63218	3.79365	2.91166	2.56862	2.14009	1.84166	251	9.13323	3.84525	4.09782	2.02919	3.94391	1.66288	1.63459	1.01798
252	6.12267	3.81194	6.75516	3.856	3.06789	2.60743	2.29181	2.00534	252	9.26214	3.78749	4.3305	2.02157	4.05544	1.66466	1.50743	0.944493
253	6.56057	4.09805	6.8703	3.89908	3.23946	2.64209	2.43321	2.16515	253	9.37939	3.73183	4.55957	2.01871	4.19312	1.66506	1.37765	0.861803
254	7.04464	4.38905	6.96783	3.91995	3.42733	2.67801	2.5628	2.31536	254	9.50056	3.67821	4.77579	2.0219	4.36677	1.66749	1.25939	0.779819
255	7.57523	4.68457	7.04049	3.91767	3.63022	2.72017	2.68123	2.45137	255	9.64183	3.62567	4.97218	2.03059	4.58521	1.6758	1.16661	0.708851
256	8.15173	4.98338	7.08495	3.89356	3.84443	2.77204	2.79118	2.5701	256	9.81792	3.57261	5.14476	2.04267	4.85487	1.69452	1.11083	0.658236
257	8.77224	5.28315	7.10273	3.85136	4.06442	2.83501	2.89678	2.67015	257	10.0402	3.51689	5.29307	2.05511	5.17828	1.72859	1.09918	0.63491
258	9.43292	5.58028	7.10032	3.79711	4.28365	2.9082	3.00273	2.75151	258	10.3154	3.45589	5.41993	2.06492	5.55257	1.78267	1.13314	0.64192
259	10.1281	5.87034	7.0885	3.73872	4.49577	2.9891	3.11326	2.81514	259	10.6445	3.38674	5.53085	2.06991	5.96878	1.85984	1.2083	0.677412
260	10.8502	6.14854	7.0807	3.68517	4.69576	3.07442	3.23118	2.86247	260	11.0229	3.3068	5.63283	2.06923	6.41205	1.96041	1.31503	0.735112
261	11.5904	6.41058	7.0908	3.6452	4.88097	3.16122	3.35718	2.89503	261	11.4416	3.21427	5.73304	2.06346	6.86338	2.08138	1.44019	0.806101
262	12.3387	6.65317	7.13079	3.62593	5.05158	3.24779	3.48972	2.91433	262	11.888	3.10903	5.83732	2.05424	7.3022	2.21678	1.56929	0.880792
263	13.0849	6.8746	7.20878	3.6314	5.21074	3.33409	3.62531	2.92175	263	12.3482	2.99323	5.94924	2.04362	7.70989	2.35894	1.68891	0.950573
264	13.8191	7.0748	7.32791	3.66173	5.36401	3.42169	3.75932	2.91855	264	12.808	2.87147	6.06953	2.03352	8.0728	2.49993	1.78879	1.00896
265	14.5314	7.25515	7.48653	3.71286	5.51835	3.51328	3.88703	2.90588	265	13.2546	2.75048	6.19627	2.02542	8.3846	2.63297	1.86335	1.05239
266	15.2129	7.41789	7.67925	3.77734	5.68073	3.61175	4.0047	2.88464	266	13.6767	2.63817	6.32556	2.02041	8.64694	2.75343	1.91228	1.08043
267	15.8555	7.56543	7.89881	3.84575	5.85664	3.71907	4.11037	2.85558	267	14.065	2.5421	6.45274	2.01938	8.8686	2.85964	1.94023	1.09555
268	16.4522	7.69956	8.13786	3.9085	6.04881	3.83527	4.20425	2.81937	268	14.4116	2.46774	6.5736	2.02321	9.06318	2.95326	1.95553	1.10227
269	16.9979	7.82088	8.39018	3.95768	6.25653	3.95772	4.2885	2.77696	269	14.7103	2.41704	6.68548	2.03281	9.2464	3.03921	1.96849	1.10611
270	17.4892	7.92839	8.65091	3.98837	6.47555	4.081	4.36658	2.72987	270	14.9554	2.38802	6.78802	2.04911	9.43318	3.12492	1.9893	1.11234
271	17.9257	8.01955	8.91615	3.99935	6.69893	4.19741	4.44233	2.68045	271	15.1425	2.3754	6.88344	2.07308	9.63566	3.21891	2.02619	1.12493
272	18.3099	8.09069	9.18181	3.99297	6.91823	4.29803	4.51895	2.63168	272	15.2689	2.37218	6.97633	2.10586	9.86176	3.3289	2.08405	1.14581
273	18.6472	8.13777	9.44283	3.97446	7.12515	4.37413	4.59829	2.58676	273	15.3339	2.37134	7.07314	2.14883	10.1148	3.46	2.16369	1.17462
274	18.9454	8.15727	9.69275	3.95071	7.31289	4.41848	4.68045	2.54841	274	15.3398	2.36693	7.18132	2.2035	10.3933	3.61335	2.26195	1.20886
275	19.2139	8.14715	9.92417	3.92896	7.4772	4.42646	4.76391	2.51828	275	15.2928	2.35459	7.30839	2.27126	10.6914	3.78572	2.37243	1.24452
276	19.462	8.10766	10.1296	3.91537	7.61685	4.39672	4.846	2.49666	276	15.2025	2.33152	7.46101	2.35296	10.9991	3.9698	2.48687	1.27694
277	19.698	8.0418	10.3028	3.91391	7.73356	4.33138	4.92363	2.48254	277	15.0818	2.29618	7.64412	2.44864	11.3031	4.15555	2.59672	1.30173
278	19.9279	7.95535	10.4394	3.92561	7.83153	4.23577	4.99401	2.47397	278	14.9454	2.24802	7.86033	2.55736	11.5886	4.33168	2.6948	1.31559
279	20.1553	7.85633	10.5372	3.94838	7.91683	4.11781	5.05539	2.46856	279	14.8086	2.18728	8.10964	2.67733	11.8408	4.48749	2.77658	1.31686
280	20.3823	7.754	10.5964	3.97747	7.9968	3.98696	5.10753	2.46387	280	14.6856	2.11477	8.38946	2.80616	12.0483	4.6143	2.84092	1.30572
281	20.6103	7.65756	10.6186	4.00649	8.07934	3.85306	5.15201	2.45782	281	14.5882	2.03171	8.69491	2.94103	12.2053	4.70647	2.89006	1.28416
282	20.842	7.5749	10.6069	4.02871	8.17242	3.725	5.19227	2.44883	282	14.5252	1.93972	9.01952	3.07894	12.3136	4.76187	2.92891	1.25559
283	21.0826	7.51171	10.5652	4.03848	8.28354	3.60957	5.23334	2.43597	283	14.5025	1.84105	9.35575	3.21677	12.383	4.78172	2.96359	1.22447
284	21.3393	7.47111	10.4984	4.0323	8.41919	3.51065	5.28127	2.41897	284	14.5239	1.73926	9.69572	3.35148	12.4301	4.77009	2.99983	1.19576
285	21.6211	7.45381	10.4129	4.00944	8.58435	3.42902	5.34218	2.39834	285	14.5916	1.6399	10.0315	3.48026	12.4754	4.73312	3.04133	1.17437
286	21.936	7.45848	10.3163	3.97189	8.78225	3.36267	5.42127	2.37559	286	14.707	1.55062	10.3556	3.60073	12.5392	4.67807	3.08874	1.16431
287	22.2886	7.4822	10.2173	3.9237	9.01409	3.30784	5.52173	2.35331	287	14.8708	1.48011	10.6609	3.71102	12.638	4.61247	3.13936	1.16779
288	22.6774	7.52095	10.1252	3.86986	9.27916	3.26017	5.64405	2.33493	288	15.0815	1.43577	10.9411	3.80989	12.7811	4.54325	3.18782	1.18433
289	23.093	7.56998	10.048	3.81507	9.57483	3.216	5.78579	2.32413	289	15.3344	1.4211	11.1909	3.89659	12.9691	4.47618	3.22745	1.21056
290	23.518	7.62429	9.99185	3.76265	9.89668	3.1733	5.94198	2.32396	290	15.6197	1.43453	11.4065	3.97075	13.1945	4.41526	3.25194	1.24076
291	23.9281	7.67893	9.95917	3.71394	10.2384	3.13222	6.1059	2.33615	291	15.922	1.47065	11.5863	4.032	13.4432	4.36244	3.25698	1.26802
292	24.2955	7.72938	9.94838	3.66812	10.5915	3.095	6.27022	2.36091	292	16.2207	1.52259	11.7311	4.07966	13.6981	4.31746	3.24134	1.28567
293	24.5927	7.77168	9.95391	3.62259	10.9458	3.06527	6.42798	2.39715	293	16.4919	1.58392	11.8444	4.11243	13.9427	4.27788	3.2072	1.28847
294	24.7968	7.80256	9.96705	3.57365	11.2887	3.04681	6.57334	2.44282	294	16.7123	1.64935	11.9321	4.12839	14.1643	4.23952	3.15984	1.27356
295	24.8931	7.81956	9.97734	3.51741	11.607	3.04205	6.70183	2.49518	295	16.8629	1.71449	12.0014	4.12535	14.3561	4.19712	3.10677	1.24098
296	24.878	7.82111	9.97436	3.45065	11.8874	3.05085	6.81027	2.55102	296	16.9323	1.77542	12.0597	4.10156	14.518	4.14534	3.05666	1.19403
297	24.7597	7.80666	9.94937	3.37156	12.1188	3.07007	6.89645	2.6069	297	16.9188	1.82847	12.1131	4.05647	14.6559	4.07972	3.01827	1.13936
298	24.5572	7.77675	9.89671	3.28016	12.2946	3.09411	6.95887	2.6595	298	16.8305	1.87013	12.1647	3.99139	14.78	3.99738	2.99944	1.08654
299	24.2984	7.73305	9.81454	3.1785	12.4135	3.11641	6.99657	2.70604	299	16.6832	1.89722	12.2141	3.90966	14.9012	3.89757	3.00641	1.04679
300	24.0158	7.67826	9.70504	3.07047	12.4816	3.13117	7.0094	2.74455	300	16.4979	1.90721	12.2567	3.81636	15.0294	3.78194	3.04321	1.0301
301	23.7429	7.61588	9.57372	2.96129	12.5114	3.13491	6.9983	2.77396	301	16.2964	1.89861	12.2854	3.71746	15.1702	3.65492	3.11126	1.04146
