# Supplementary material for: Hierarchical architecture of dopaminergic circuits enables second-order conditioning in Drosophila
Source: eLife journal article supplement (doi:10.7554/elife.79042), 2023-01-24
Supplement: fig3-figsupp2-data1 [file Figure_3-figure-supplement2D_Source_data.xlsx]

## Sheet: Sheet1
	OCT(CS+)		MCH(CS-)			OCT(CS-)		MCH(CS+)
	Pre	Post	Pre	Post		Pre	Post	Pre	Post
Mean	74.0667	19.56	66.5333	46.9733	Mean	68.112	50.616	62.04	20.264
SEM	7.62814	5.67362	4.23695	9.60333	SEM	9.06467	3.39309	10.0296	4.37995
Fly1	53.28	17.8	60.8	34.36	Fly1	86.12	48.84	83.2	22.56
Fly2	56.28	3.6	51.76	27.36	Fly2	66.56	54.44	65.44	25.84
Fly3	96.16	17.56	81.04	84.52	Fly3	75.48	61.6	50	17.6
Fly4	81.16	42.84	74.2	62.52	Fly4	34.08	42.24	30	4.88
Fly5	64.36	8.96	62.8	23.24	Fly5	78.32	45.96	81.56	30.44
Fly6	93.16	26.6	68.6	49.84
