# Supplementary material for: Hierarchical architecture of dopaminergic circuits enables second-order conditioning in Drosophila
Source: eLife journal article supplement (doi:10.7554/elife.79042), 2023-01-24
Supplement: fig5-data1 [file Figure_5_Source_data.xlsx]

## Sheet: Sheet1
	Time Trace								Raster Plot (Spike timing, sec)
	OCT			MCH					OCT															MCH
Time (x10^-4) (sec)	Pre	Post1	Post2	Pre	Post1	Post2			Pre					Post1					Post2					Pre					Post1					Post2
1	-58.6544	-54.526	-61.5075	-56.8532	-53.7996	-57.6716			Trial1	Trial2	Trial3	Trial4	Trial5	Trial1	Trial2	Trial3	Trial4	Trial5	Trial1	Trial2	Trial3	Trial4	Trial5	Trial1	Trial2	Trial3	Trial4	Trial5	Trial1	Trial2	Trial3	Trial4	Trial5	Trial1	Trial2	Trial3	Trial4	Trial5
2	-58.6544	-54.4964	-61.5075	-56.8499	-53.7568	-57.6848			0.0063	0.0497	0.04	0.301	0.108	0.0557001	0.1418	0.1365	0.0446999	0.2829	0.1973	0.5295	0.308	0.8003	0.0789001	0.0225999	0.0618999	0.0378001	0.0495999	0.0013001	0.0023	0.2381	0.354	0.007	0.3565	0.0014	0.1337	0.2148	0.5701	0.111
3	-58.6807	-54.5227	-61.4812	-56.8827	-53.8193	-57.6256			0.3007	0.4405	0.0704	0.6972	0.1675	0.2679	0.2058	0.1828	0.218	0.4272	0.3282	0.569	0.3438	0.8462	0.2096	0.1792	0.3932	0.3576	0.0762	0.0386	0.1905	0.4401	0.4707	0.1231	0.4932	0.3927	0.6515	0.3758	0.645	0.3611
4	-58.6774	-54.5753	-61.5568	-56.8762	-53.8752	-57.6124			0.6658	0.5334	0.0847001	0.7442	0.2178	0.2792	0.3809	0.2681	0.2653	0.4684	0.786	0.7056	0.9169	0.892	0.2828	0.3612	0.4452	0.4715	0.1545	0.1101	0.347	0.6849	0.5623	0.142	0.6055	0.6898	1.0614	0.4873	0.7995	0.4317
5	-58.7201	-54.6114	-61.5864	-56.8893	-53.8357	-57.4777			0.9557	0.7375	0.1605	0.8087	0.5102	0.5746	0.4314	0.4577	0.3321	0.5598	0.9645	0.734	1.0424	0.9265	0.5302	0.3807	0.4842	0.5002	0.4043	0.171	0.8144	0.9043	0.6469	0.382	0.6395	1.034	1.1086	0.7909	0.9947	0.4614
6	-58.6413	-54.6936	-61.6094	-56.8104	-53.8752	-57.3462			1.0588	0.9815	0.2192	0.9072	0.5917	0.9703	0.6252	0.4883	0.3565	0.7131	1.02	0.8373	1.1677	0.9887	0.707	0.5207	0.5603	0.6577	0.4277	0.2566	1.0803	1.0501	0.8053	0.4007	0.7405	1.0579	1.1311	1.0289	1.0461	0.6548
7	-58.6873	-54.7561	-61.5404	-56.8466	-53.8292	-57.3626			1.191	1.022	0.4831	0.9666	0.6927	1.0224	0.8016	0.5665	0.5121	1.0191	1.1954	0.9699	1.1903	1.0188	0.7332	0.7103	0.7381	0.6673	0.5258	0.6123	1.154	1.0826	0.8369	0.5847	0.9622	1.0842	1.1451	1.0693	1.0863	0.7593
8	-58.6413	-54.6443	-61.6127	-56.8992	-53.8587	-57.3199			1.1968	1.0492	0.5825	0.9948	0.8688	1.0459	0.9991	0.7544	0.5349	1.0696	1.2183	1.0034	1.24	1.0318	0.9959	0.9079	0.9882	0.8587	0.6702	0.7169	1.1683	1.1548	0.9302	0.619	1.0837	1.12	1.1818	1.0943	1.1488	0.8114
9	-58.6347	-54.6443	-61.662	-56.9189	-53.793	-57.2936			1.2297	1.0876	0.6564	1.0183	1.0447	1.0586	1.0221	0.9197	0.5494	1.0777	1.2579	1.0479	1.2805	1.0505	1.0206	1.0792	1.0433	1.1312	0.7595	0.8679	1.2206	1.1865	0.9988	0.6506	1.0972	1.151	1.1933	1.1143	1.1866	0.8764
10	-58.6413	-54.7101	-61.6423	-56.9452	-53.8752	-57.3002			1.2601	1.1549	1.0149	1.0817	1.1299	1.0805	1.0625	0.989	0.5653	1.1056	1.296	1.0561	1.4007	1.0902	1.0418	1.086	1.0663	1.1647	0.7744	0.9045	1.3219	1.3044	1.1495	0.7576	1.1728	1.1789	1.2247	1.1383	1.2136	1.0349
11	-58.5952	-54.6706	-61.5995	-56.9813	-53.8785	-57.2049			1.2914	1.2093	1.0255	1.1202	1.1424	1.1102	1.0772	0.9978	0.6047	1.1271	1.697	1.097	1.5638	1.1067	1.077	1.1322	1.0837	1.1761	0.8724	1.0408	1.5661	1.7336	1.1637	0.9114	1.186	1.2057	1.2779	1.168	1.2496	1.1129
12	-58.638	-54.7232	-61.616	-56.9452	-53.9639	-57.2542			1.3379	1.2443	1.0788	1.2885	1.2389	1.1527	1.1115	1.0415	0.8098	1.1535	1.7239	1.146	1.6411	1.1592	1.1112	1.1516	1.1052	1.2483	1.0588	1.2058	1.6853	1.7773	1.1959	0.928	1.2334	1.2401	1.3917	1.1765	1.2564	1.1373
13	-58.4539	-54.6673	-61.5502	-56.9255	-53.9869	-57.126			1.3912	1.2649	1.1182	1.3373	1.4298	1.1601	1.1246	1.0758	0.8747	1.1695	1.8867	1.1903	1.8546	1.2148	1.1635	1.1686	1.1533	1.3305	1.0842	1.3319	2.0142	1.9849	1.2309	0.9828	1.2563	1.2775	1.4369	1.2568	1.3075	1.1617
14	-58.5328	-54.7133	-61.5634	-56.9879	-54.0132	-57.0734			1.4372	1.3895	1.1562	1.437	1.4944	1.1669	1.1387	1.127	0.9049	1.2049	1.9543	1.3257	1.8692	1.2247	1.1787	1.1883	1.2007	1.3483	1.098	1.4742	2.0448	2.194	1.5325	1.1296	1.3279	1.3058	1.4478	1.3488	1.3547	1.1835
15	-58.5295	-54.7495	-61.5174	-57.057	-54.056	-56.9551			1.4998	1.4119	1.1721	1.6827	1.8262	1.1805	1.1671	1.1656	0.9423	1.2386	2.0405	1.3553	2.3065	1.2379	1.2287	1.2219	1.251	1.5433	1.1098	1.9601	2.1085	2.4315	2.0424	1.1668	1.4576	1.3639	1.4807	1.4359	1.4055	1.2111
16	-58.5492	-54.7396	-61.5765	-56.9583	-54.0921	-56.9288			1.5798	1.5097	1.2172	1.9042	2.0868	1.2125	1.2006	1.2202	1.0125	1.3143	2.9893	1.3636	2.4542	1.3219	1.5821	1.2432	1.2809	1.7189	1.1379	1.9914	2.2171	2.482	2.2872	1.1971	1.4737	1.5009	1.837	1.4903	1.4732	1.2629
17	-58.6347	-54.6542	-61.4516	-56.9879	-54.0428	-56.8433			1.7951	1.5544	1.3204	2.306	2.289	1.2244	1.2465	1.2417	1.0433	1.3626		1.4553	2.5309	1.5047	1.8447	1.267	1.3279	1.7391	1.1564	2.248	2.3296	2.7161	2.4336	1.2582	2.2157	1.552	2.4267	1.6562	1.4875	1.3317
18	-58.6577	-54.7429	-61.4483	-57.08	-54.0494	-56.6987			1.8108	1.7443	1.3796	2.4618	2.3291	1.2994	1.278	1.2953	1.0804	1.3828		1.6472	2.5926	1.6716	1.9511	1.3002	1.3734	2.0987	1.2002	2.3982	2.4668	2.7965	2.5387	1.371	2.3189	1.5582	2.4601	1.7261	1.5201	1.4312
19	-58.6577	-54.7035	-61.5042	-57.0537	-54.0395	-56.6066			1.9081	1.8012	1.6101	2.6477	2.3948	1.3237	1.3086	1.3243	1.1199	1.4189		1.6927	2.6377	1.8019	2.0242	1.3117	1.492	2.4295	1.2066	2.7041	2.5264	2.8537	2.5771	1.5155	2.6944	1.595	2.6001	1.9012	1.5775	2.5221
20	-58.707	-54.7364	-61.4878	-57.0274	-54.0724	-56.531			1.9172	1.8508	1.9165	2.6929	2.4619	1.3731	1.3482	1.3547	1.1595	1.4251		1.7523	2.724	2.038	2.0681	1.3469	1.5292	2.4714	1.2458	2.7889	2.546	2.9312	2.6245	1.6047	2.7342	1.7336	2.6194	2.069	1.6091	2.832
21	-58.6939	-54.7331	-61.4878	-57.0865	-54.0691	-56.3798			2.003	2.3311	1.9603	2.7663	2.5582	1.3989	1.3688	1.3881	1.1901	1.4455		1.8532	2.9094	2.4047	2.115	1.3823	1.6549	2.4907	1.2862	2.9749	2.6381		2.8477	1.7534	2.764	1.875	2.7007	2.1599	1.7125	2.8688
22	-58.7366	-54.7955	-61.5042	-57.0339	-54.1447	-56.37			2.0152	2.3826	2.0715	2.8238	2.6869	1.4458	1.4353	1.4306	1.2258	1.4825		1.9299	2.9494	2.4294	2.2213	1.4162	1.7313	2.5282	1.3062		2.6958		2.956	1.793	2.8372	1.9104	2.968	2.2358	1.773
23	-58.7333	-54.7922	-61.445	-57.1358	-54.0757	-56.2746			2.1638	2.4064	2.1429	2.9169	2.7183	1.4739	1.4878	1.4751	1.2496	1.6706		1.9454	2.9869	2.4684	2.4716	1.45	1.7878	2.5981	1.3166		2.8853			1.9342		1.9298		2.296	1.8126
24	-58.7267	-54.8481	-61.422	-57.0635	-54.0954	-56.1399			2.3865	2.4989	2.5299	2.9727	2.8252	1.4977	1.513	1.505	1.2618	1.7326		2.067		2.8122	2.4986	1.5056	1.8687	2.6541	1.3465					2.2856		2.1866		2.4311	2.0515
25	-58.753	-54.8087	-61.4023	-57.1851	-54.1316	-56.0248			2.4359	2.5959	2.576		2.8822	1.5084	1.5378	1.5242	1.2871	2.1122		2.393		2.8499	2.5444	1.5589	1.9905	2.7021	1.616					2.5364		2.3186		2.5901	2.0815
26	-58.6774	-54.8317	-61.4253	-57.2706	-54.1414	-55.9361			2.4606	2.6442	2.6561			1.607	1.5664	1.5775	1.4297	2.6992				2.9246	2.5994	1.5902	2.0317	2.7253	1.7493					2.5432		2.3391		2.6569	2.2072
27	-58.6906	-54.9204	-61.445	-57.3462	-54.1776	-55.9032			2.5405	2.6722	2.6974			1.636	1.6141	1.6305	1.4798	2.9026					2.6613	1.6077	2.0807	2.8647	1.827					2.5565		2.5614		2.8973	2.252
28	-58.6413	-54.8974	-61.4418	-57.5138	-54.2104	-55.8441			2.6891	2.7667	2.7557			1.6518	1.6972	1.6531	1.4996	2.9439					2.8529	1.6179	2.1204	2.9692	1.8669					2.5994		2.8012			2.3295
29	-58.6117	-54.9467	-61.5108	-57.5631	-54.24	-55.8112			2.778	2.7815	2.769			1.6646	1.7395	1.691	1.5146	2.9864					2.9637	1.6328	2.2425		1.8766					2.7222					2.3534
30	-58.5591	-54.9401	-61.5568	-57.5105	-54.2499	-55.7027			2.8273	2.8087	2.8117			1.6844	1.7849	1.7074	1.5244							1.6913	2.3496		2.2294					2.8194					2.6826
31	-58.5196	-54.9007	-61.5831	-57.6059	-54.2072	-55.6797				2.8542	2.8853			1.8301	1.9067	1.7809	1.6567							1.7054	2.4418		2.5387										2.7874
32	-58.5788	-54.8908	-61.593	-57.665	-54.3584	-55.6731				2.8785	2.9299			1.8508	1.9156	1.7957	1.7831							1.7246	2.4565		2.5804										2.819
33	-58.7037	-54.9467	-61.6127	-57.6913	-54.3682	-55.5449				2.9193				1.8714	1.9304	1.8974	1.8032							1.7437	2.5127		2.628										2.8861
34	-58.753	-54.9566	-61.5469	-57.7768	-54.3485	-55.5647				2.9888				1.9219	2.0651	1.947	1.8935							1.769	2.5714		2.7069										2.933
35	-58.6413	-55.0322	-61.616	-57.9017	-54.3748	-55.4496								2.0385	2.7162	2.1651	1.9536							1.8166	2.6171		2.8926										2.987
36	-58.6183	-55.0256	-61.5437	-58.0365	-54.4109	-55.3707								2.0646	2.8405	2.277	2.038							1.8271	2.725		2.9129										2.9998
37	-58.6807	-54.9664	-61.5535	-58.0529	-54.4208	-55.3247								2.412		2.3554	2.1804							1.8429	2.9428		2.9943
38	-58.7596	-54.9993	-61.5667	-58.0956	-54.3452	-55.328								2.4606		2.5825	2.5366							1.878
39	-58.7037	-55.0683	-61.5206	-58.1121	-54.3649	-55.2064								2.6964		2.6167	2.5861							1.9065
40	-58.6906	-55.0683	-61.5437	-58.0792	-54.3682	-55.1308								2.7669		2.6493	2.6052							1.979
41	-58.7563	-55.0979	-61.5535	-58.214	-54.3222	-55.042								2.8782		2.705	2.719							2.0335
42	-58.7004	-55.1209	-61.6357	-58.1844	-54.3584	-55.0946								2.9113		2.7313	2.9629							2.074
43	-58.7169	-55.1045	-61.4911	-58.2567	-54.2992	-55.0289								2.9771		2.8045	2.9925							2.198
44	-58.6807	-55.1045	-61.5502	-58.3257	-54.3485	-54.9533										2.8805								2.3216
45	-58.7662	-55.1045	-61.5962	-58.4046	-54.3025	-54.8941										2.9027								2.3409
46	-58.7136	-55.1505	-61.6587	-58.2698	-54.4175	-54.8021										2.9342								2.5144
47	-58.6643	-55.1571	-61.6718	-58.2994	-54.3353	-54.7659																		2.5855
48	-58.6281	-55.1472	-61.7179	-58.3093	-54.3879	-54.7955																		2.7143
49	-58.6314	-55.1374	-61.731	-58.4408	-54.3847	-54.7857																		2.8096
50	-58.4769	-55.2458	-61.7343	-58.398	-54.3978	-54.7002																		2.9383
51	-58.615	-55.1571	-61.7836	-58.3586	-54.3912	-54.6246																		2.9635
52	-58.6708	-55.1406	-61.777	-58.2567	-54.3025	-54.6706																		2.9772
53	-58.6939	-55.1176	-61.6686	-58.3356	-54.4142	-54.6246
54	-58.684	-55.1538	-61.7967	-58.2238	-54.4077	-54.5523
55	-58.6774	-55.1965	-61.8033	-58.1942	-54.4208	-54.4668
56	-58.7103	-55.1867	-61.7836	-58.1877	-54.3814	-54.4372
57	-58.6478	-55.2097	-61.7902	-58.1351	-54.4274	-54.4044
58	-58.7103	-55.2787	-61.823	-58.1745	-54.4274	-54.3584
59	-58.753	-55.3017	-61.8329	-58.1351	-54.4208	-54.4405
60	-58.7727	-55.2064	-61.823	-58.1153	-54.3978	-54.3485
61	-58.6708	-55.3247	-61.9118	-58.0825	-54.4767	-54.4339
62	-58.7925	-55.305	-61.846	-58.1515	-54.4438	-54.3978
63	-58.7333	-55.3017	-61.9118	-58.2205	-54.5424	-54.4767
64	-58.7366	-55.2919	-61.9907	-58.26	-54.5194	-54.4142
65	-58.6873	-55.3839	-61.8658	-58.3093	-54.5096	-54.3978
66	-58.7004	-55.3872	-61.9644	-58.306	-54.5161	-54.4077
67	-58.707	-55.4036	-61.9282	-58.3126	-54.5293	-54.4011
68	-58.7333	-55.3872	-61.9019	-58.3553	-54.4964	-54.4044
69	-58.8023	-55.4266	-61.8625	-58.4605	-54.6016	-54.48
70	-58.6939	-55.4398	-61.9644	-58.5361	-54.5161	-54.48
71	-58.7399	-55.4562	-61.9217	-58.5854	-54.5621	-54.4339
72	-58.753	-55.5154	-61.9874	-58.6018	-54.5424	-54.4011
73	-58.7464	-55.5154	-61.9019	-58.569	-54.4537	-54.4504
74	-58.7267	-55.4989	-61.9184	-58.5887	-54.526	-54.4011
75	-58.6741	-55.5022	-61.8296	-58.569	-54.5161	-54.3255
76	-58.8253	-55.5745	-61.9085	-58.5131	-54.5391	-54.3715
77	-58.8483	-55.5614	-61.8789	-58.5722	-54.6049	-54.3353
78	-58.8352	-55.6567	-61.8986	-58.5558	-54.5589	-54.3485
79	-58.8812	-55.6731	-61.8559	-58.5164	-54.5457	-54.3156
80	-58.8746	-55.6731	-61.8362	-58.5164	-54.526	-54.2762
81	-58.8779	-55.7915	-61.8428	-58.6084	-54.503	-54.2532
82	-58.9995	-55.7257	-61.8033	-58.5427	-54.5424	-54.2893
83	-58.9535	-55.8375	-61.7573	-58.5427	-54.5556	-54.3025
84	-58.9765	-55.8079	-61.777	-58.5788	-54.5227	-54.2795
85	-58.8845	-55.7487	-61.7639	-58.5492	-54.5523	-54.3551
86	-58.9141	-55.7619	-61.7474	-58.5164	-54.6246	-54.3025
87	-58.9174	-55.798	-61.7376	-58.4506	-54.5589	-54.3649
88	-58.8944	-55.8276	-61.8	-58.2994	-54.6049	-54.3156
89	-58.9009	-55.8999	-61.7179	-58.3882	-54.5358	-54.2137
90	-58.8845	-55.8671	-61.7442	-58.3553	-54.5326	-54.263
91	-58.8714	-55.8999	-61.7277	-58.4342	-54.5917	-54.2696
92	-58.8582	-55.8901	-61.7474	-58.4769	-54.5096	-54.1874
93	-58.9207	-55.9492	-61.777	-58.5131	-54.526	-54.2302
94	-58.8549	-55.9328	-61.7376	-58.4112	-54.5358	-54.2335
95	-58.9338	-55.9295	-61.7803	-58.4835	-54.503	-54.2335
96	-59.0094	-55.9755	-61.7014	-58.4966	-54.4668	-54.2893
97	-58.9371	-55.9427	-61.6521	-58.444	-54.4438	-54.217
98	-59.0258	-56.0281	-61.7179	-58.4342	-54.5293	-54.263
99	-58.9995	-56.0413	-61.6718	-58.4408	-54.549	-54.1513
100	-58.9568	-56.0774	-61.7606	-58.4375	-54.4931	-54.1381
101	-58.9765	-56.0643	-61.7836	-58.4473	-54.4898	-54.1085
102	-58.9141	-56.13	-61.7737	-58.4539	-54.5556	-54.1217
103	-59.0258	-56.1892	-61.7803	-58.4671	-54.5194	-54.0987
104	-58.9732	-56.176	-61.7836	-58.5295	-54.526	-54.0658
105	-58.9009	-56.1366	-61.7376	-58.5427	-54.4537	-54.0987
106	-58.9141	-56.2253	-61.6981	-58.5492	-54.503	-54.0592
107	-58.8976	-56.1432	-61.8329	-58.6117	-54.4044	-54.0165
108	-58.8155	-56.2319	-61.8099	-58.6018	-54.5523	-54.102
109	-58.8615	-56.2352	-61.8756	-58.5492	-54.526	-54.1151
110	-58.8385	-56.1465	-61.8132	-58.5657	-54.4471	-54.0329
111	-58.9535	-56.2615	-61.8954	-58.5361	-54.526	-54.079
112	-58.9765	-56.199	-61.8132	-58.4506	-54.5556	-54.1085
113	-58.9502	-56.2516	-61.8198	-58.375	-54.5227	-54.1184
114	-58.9469	-56.2681	-61.8296	-58.3323	-54.5161	-54.148
115	-58.8582	-56.2582	-61.8789	-58.2567	-54.5687	-54.2236
116	-58.776	-56.2746	-61.8954	-58.1647	-54.5687	-54.2104
117	-58.7727	-56.2352	-61.8822	-58.1055	-54.618	-54.1381
118	-58.7136	-56.3042	-61.8329	-58.0397	-54.5852	-54.2466
119	-58.7892	-56.2845	-61.8756	-58.0595	-54.6377	-54.24
120	-58.7629	-56.2779	-61.9085	-58.0365	-54.6805	-54.2269
121	-58.8155	-56.2549	-61.8986	-57.9543	-54.6246	-54.3025
122	-58.8023	-56.2516	-61.846	-57.9444	-54.5917	-54.217
123	-58.7925	-56.2385	-61.8362	-57.8655	-54.5917	-54.2203
124	-58.8089	-56.3075	-61.7935	-57.8261	-54.5852	-54.2466
125	-58.7629	-56.2681	-61.8526	-57.7143	-54.618	-54.2137
126	-58.8253	-56.347	-61.8395	-57.711	-54.6509	-54.2696
127	-58.8188	-56.4357	-61.8	-57.6486	-54.6575	-54.2302
128	-58.8451	-56.4258	-61.8033	-57.6585	-54.7068	-54.2532
129	-58.8451	-56.3765	-61.7935	-57.8392	-54.7035	-54.3222
130	-58.9371	-56.37	-61.8198	-57.7768	-54.7035	-54.24
131	-58.9174	-56.3371	-61.7474	-57.6979	-54.6903	-54.2466
132	-58.9207	-56.2845	-61.7507	-57.6749	-54.7495	-54.2597
133	-58.9108	-56.3305	-61.7639	-57.6387	-54.7429	-54.2926
134	-58.9108	-56.3174	-61.7343	-57.6979	-54.7725	-54.2729
135	-58.8155	-56.3667	-61.7113	-57.6683	-54.7988	-54.3288
136	-58.9502	-56.3568	-61.7474	-57.6617	-54.7791	-54.3814
137	-58.9469	-56.2977	-61.7672	-57.7012	-54.8317	-54.3518
138	-58.9338	-56.3634	-61.7113	-57.6124	-54.7725	-54.3551
139	-58.9075	-56.3864	-61.7113	-57.5007	-54.7955	-54.2893
140	-58.9404	-56.3733	-61.6817	-57.4382	-54.7166	-54.2893
141	-58.9667	-56.4291	-61.7507	-57.3922	-54.7495	-54.309
142	-58.9404	-56.4521	-61.731	-57.3922	-54.8021	-54.3551
143	-58.9108	-56.4028	-61.7507	-57.4349	-54.7364	-54.4537
144	-58.9831	-56.485	-61.7869	-57.3988	-54.8317	-54.3321
145	-59.0456	-56.4653	-61.754	-57.3331	-54.8152	-54.3748
146	-59.016	-56.4653	-61.9019	-57.3659	-54.812	-54.3518
147	-58.9174	-56.462	-61.9217	-57.3298	-54.8448	-54.3518
148	-58.8878	-56.3798	-61.9118	-57.3265	-54.8218	-54.4241
149	-58.9864	-56.3798	-61.9019	-57.2772	-54.7166	-54.4109
150	-58.9042	-56.3174	-61.9841	-57.3824	-54.7232	-54.4471
151	-58.9239	-56.3897	-61.9447	-57.4514	-54.7561	-54.4865
152	-58.9667	-56.4127	-61.9282	-57.4382	-54.7396	-54.5753
153	-58.8845	-56.4521	-61.9052	-57.5204	-54.7955	-54.4668
154	-58.9338	-56.4291	-61.8789	-57.5993	-54.7988	-54.5194
155	-58.9437	-56.485	-61.9414	-57.6617	-54.8021	-54.549
156	-58.8549	-56.554	-61.9217	-57.6617	-54.7659	-54.5391
157	-58.9963	-56.4752	-61.9447	-57.5927	-54.7692	-54.5654
158	-59.0061	-56.4357	-61.9973	-57.7176	-54.7889	-54.5358
159	-58.9305	-56.4423	-61.9512	-57.7406	-54.835	-54.4931
160	-58.8615	-56.4784	-62.017	-57.7538	-54.8843	-54.5391
161	-58.9141	-56.416	-61.9808	-57.7965	-54.8744	-54.641
162	-58.8155	-56.4193	-61.9907	-57.7242	-54.8645	-54.664
163	-58.8516	-56.3996	-61.9841	-57.8294	-54.9138	-54.5884
164	-58.8089	-56.4752	-62.0926	-57.8655	-54.9171	-54.6345
165	-58.8615	-56.4193	-61.9644	-57.8787	-54.927	-54.6575
166	-58.799	-56.5475	-61.9545	-57.8721	-54.9369	-54.7101
167	-58.799	-56.5179	-62.0433	-57.882	-54.9632	-54.6838
168	-58.7662	-56.5245	-62.0564	-57.9181	-55.0355	-54.7232
169	-58.7727	-56.5146	-61.971	-57.8688	-55.065	-54.687
170	-58.7103	-56.5146	-61.9512	-57.7538	-55.1341	-54.7364
171	-58.6741	-56.5376	-61.9479	-57.7768	-55.0913	-54.7462
172	-58.6971	-56.5935	-61.9348	-57.836	-55.0979	-54.7429
173	-58.6215	-56.5113	-61.9151	-57.8491	-55.0881	-54.7692
174	-58.5229	-56.554	-61.7935	-57.7012	-55.1111	-54.7988
175	-58.5722	-56.5212	-61.7902	-57.7538	-55.065	-54.7594
176	-58.4802	-56.485	-61.8	-57.7735	-55.0979	-54.7889
177	-58.4966	-56.416	-61.8296	-57.665	-55.1735	-54.7298
178	-58.4736	-56.5343	-61.7737	-57.665	-55.213	-54.7659
179	-58.5131	-56.5409	-61.7606	-57.6617	-55.1472	-54.7725
180	-58.4901	-56.5146	-61.731	-57.6157	-55.1604	-54.8448
181	-58.3717	-56.5245	-61.6653	-57.6913	-55.2163	-54.7791
182	-58.3882	-56.462	-61.6423	-57.711	-55.2491	-54.8843
183	-58.4079	-56.4883	-61.7277	-57.6913	-55.2721	-54.8843
184	-58.3684	-56.4752	-61.6718	-57.7604	-55.2919	-54.8876
185	-58.4736	-56.5376	-61.5962	-57.7242	-55.305	-54.8876
186	-58.4408	-56.5113	-61.6258	-57.8261	-55.3214	-54.8777
187	-58.421	-56.5245	-61.5864	-57.8228	-55.3214	-54.9566
188	-58.3947	-56.531	-61.5371	-57.6913	-55.3412	-54.9599
189	-58.3849	-56.5343	-61.5535	-57.7735	-55.4332	-54.927
190	-58.4145	-56.5014	-61.5601	-57.7176	-55.397	-54.9237
191	-58.3487	-56.5935	-61.5009	-57.8195	-55.5088	-54.973
192	-58.3454	-56.6001	-61.5667	-57.6617	-55.5844	-55.0683
193	-58.2863	-56.5738	-61.5371	-57.688	-55.5745	-54.9796
194	-58.4671	-56.6296	-61.5009	-57.6157	-55.66	-54.9401
195	-58.3914	-56.6198	-61.4812	-57.6979	-55.6238	-54.927
196	-58.398	-56.5475	-61.5042	-57.7341	-55.7257	-54.9336
197	-58.3914	-56.6296	-61.445	-57.7078	-55.7093	-54.8941
198	-58.3389	-56.6724	-61.4812	-57.813	-55.7224	-54.8547
199	-58.3947	-56.6231	-61.4319	-57.8392	-55.7586	-54.9073
200	-58.3487	-56.6822	-61.5009	-57.7899	-55.7356	-54.8547
201	-58.3454	-56.6658	-61.5075	-57.8195	-55.7849	-54.8021
202	-58.329	-56.6428	-61.4878	-57.836	-55.8375	-54.8777
203	-58.1844	-56.6592	-61.5535	-57.8655	-55.8967	-54.812
204	-58.237	-56.6888	-61.5206	-57.8885	-55.9131	-54.7594
205	-58.1153	-56.6165	-61.4648	-57.9379	-55.9295	-54.664
206	-58.1712	-56.6132	-61.4516	-57.8951	-55.8934	-54.6279
207	-58.2271	-56.5606	-61.4746	-57.928	-55.8967	-54.6706
208	-58.2764	-56.6198	-61.5305	-57.905	-55.8999	-54.7199
209	-58.2205	-56.725	-61.4713	-57.928	-55.9492	-54.6345
210	-58.1548	-56.6757	-61.5108	-57.8918	-55.9394	-54.7659
211	-58.1614	-56.6362	-61.5305	-57.8721	-55.992	-54.7101
212	-58.1482	-56.6494	-61.5141	-57.836	-55.9985	-54.7889
213	-58.1088	-56.6461	-61.5141	-57.9017	-56.0018	-54.7889
214	-58.0332	-56.6001	-61.4648	-58.0069	-55.946	-54.7824
215	-58.0134	-56.5902	-61.4878	-58.0069	-55.992	-54.6969
216	-57.9444	-56.6428	-61.445	-58.0693	-56.0577	-54.6838
217	-57.997	-56.6494	-61.5009	-58.0102	-56.0741	-54.6903
218	-57.9707	-56.6362	-61.5272	-58.0266	-56.1004	-54.6903
219	-57.905	-56.7151	-61.5042	-57.9839	-56.153	-54.6805
220	-57.9313	-56.7348	-61.5568	-58.0036	-56.13	-54.6575
221	-57.8951	-56.7644	-61.5437	-58.0299	-56.2122	-54.5457
222	-57.8425	-56.7776	-61.6258	-58.1022	-56.1958	-54.595
223	-57.9181	-56.8499	-61.639	-58.0332	-56.1793	-54.6377
224	-57.8918	-56.748	-61.639	-58.066	-56.2615	-54.5753
225	-57.9116	-56.7874	-61.5699	-58.0102	-56.2911	-54.6345
226	-57.859	-56.8071	-61.6291	-58.0858	-56.2023	-54.5556
227	-57.9313	-56.863	-61.5272	-58.1745	-56.3733	-54.5654
228	-57.8097	-56.7578	-61.5009	-58.237	-56.3404	-54.5391
229	-57.7636	-56.7776	-61.5535	-58.1712	-56.3174	-54.5424
230	-57.7571	-56.7513	-61.5009	-58.1285	-56.4028	-54.5917
231	-57.7308	-56.8203	-61.5699	-58.1909	-56.2779	-54.5654
232	-57.7538	-56.8433	-61.6324	-58.2567	-56.3141	-54.549
233	-57.6026	-56.8926	-61.5995	-58.2435	-56.4357	-54.4603
234	-57.688	-56.886	-61.5174	-58.3158	-56.3831	-54.549
235	-57.619	-56.9485	-61.5404	-58.2567	-56.4587	-54.4274
236	-57.5368	-56.9518	-61.5864	-58.237	-56.3437	-54.457
237	-57.5007	-57.0011	-61.5338	-58.1811	-56.3437	-54.3682
238	-57.5829	-56.8729	-61.5239	-58.2928	-56.2977	-54.4077
239	-57.5927	-56.9452	-61.5141	-58.3783	-56.4061	-54.3485
240	-57.5434	-56.9189	-61.5371	-58.4177	-56.3733	-54.3123
241	-57.5566	-56.8762	-61.445	-58.3783	-56.4258	-54.3715
242	-57.5204	-56.886	-61.4286	-58.3783	-56.2878	-54.3452
243	-57.5467	-56.8762	-61.4911	-58.3421	-56.4127	-54.3222
244	-57.4974	-56.8729	-61.5206	-58.3586	-56.485	-54.2597
245	-57.458	-56.8893	-61.5141	-58.4013	-56.4489	-54.2762
246	-57.4514	-56.8893	-61.6291	-58.4177	-56.4982	-54.286
247	-57.4974	-56.909	-61.5502	-58.2994	-56.5113	-54.2762
248	-57.4744	-56.8762	-61.5502	-58.3783	-56.4949	-54.3288
249	-57.4744	-56.8466	-61.4286	-58.329	-56.6264	-54.2663
250	-57.55	-56.8466	-61.5502	-58.421	-56.5277	-54.3321
251	-57.5993	-56.7874	-61.4878	-58.2994	-56.485	-54.2302
252	-57.6486	-56.8597	-61.5831	-58.3553	-56.5968	-54.2433
253	-57.6354	-56.9156	-61.4943	-58.3684	-56.6329	-54.2072
254	-57.6913	-56.9222	-61.4483	-58.3356	-56.6231	-54.2137
255	-57.6124	-56.8827	-61.5897	-58.3224	-56.6198	-54.2367
256	-57.665	-56.8597	-61.4878	-58.3027	-56.7315	-54.2269
257	-57.5993	-56.9583	-61.5437	-58.3586	-56.6954	-54.2729
258	-57.6552	-56.8663	-61.5502	-58.3158	-56.6296	-54.3485
259	-57.5796	-56.817	-61.639	-58.3487	-56.7052	-54.2696
260	-57.5467	-56.8269	-61.5601	-58.3553	-56.7776	-54.3452
261	-57.6256	-56.9156	-61.6258	-58.3093	-56.6724	-54.3321
262	-57.6453	-56.9123	-61.5732	-58.3191	-56.6691	-54.3025
263	-57.6223	-57.0274	-61.6028	-58.3158	-56.6724	-54.3814
264	-57.711	-56.8926	-61.6488	-58.3158	-56.6691	-54.4011
265	-57.6848	-56.9583	-61.6423	-58.2172	-56.6559	-54.2926
266	-57.7078	-56.8959	-61.6258	-58.2337	-56.6724	-54.2597
267	-57.7143	-56.8926	-61.6718	-58.2665	-56.7085	-54.3485
268	-57.7341	-56.8762	-61.6817	-58.1909	-56.7282	-54.3419
269	-57.6913	-56.9189	-61.7211	-58.1811	-56.6822	-54.2992
270	-57.6946	-56.9551	-61.8198	-58.2961	-56.7315	-54.3518
271	-57.6552	-57.0241	-61.7343	-58.2994	-56.6822	-54.2565
272	-57.7406	-56.9912	-61.8395	-58.2271	-56.6001	-54.3025
273	-57.6979	-56.9912	-61.846	-58.1318	-56.6592	-54.4241
274	-57.665	-56.9879	-61.8723	-58.1219	-56.5902	-54.3584
275	-57.6124	-57.0372	-61.8592	-58.1515	-56.5869	-54.4405
276	-57.6354	-57.0602	-61.8198	-58.1416	-56.577	-54.4635
277	-57.5467	-57.0043	-61.8296	-58.1318	-56.6559	-54.4044
278	-57.527	-57.0701	-61.8066	-58.1088	-56.6066	-54.4208
279	-57.5204	-57.0471	-61.7113	-58.0891	-56.6099	-54.4011
280	-57.4908	-57.0109	-61.8526	-58.1153	-56.6658	-54.3551
281	-57.4744	-57.08	-61.8362	-58.1515	-56.6724	-54.3978
282	-57.3955	-57.0504	-61.8296	-58.0036	-56.6921	-54.3912
283	-57.2213	-57.0339	-61.9019	-57.9806	-56.6789	-54.4997
284	-57.2673	-57.0175	-61.9052	-58.0397	-56.5343	-54.4997
285	-57.0931	-57.0372	-61.8822	-58.0628	-56.5376	-54.5523
286	-57.0339	-57.0997	-61.9151	-58.02	-56.6527	-54.6279
287	-57.0438	-57.0307	-61.9118	-58.0693	-56.6559	-54.6147
288	-56.9123	-57.0438	-61.8658	-58.1679	-56.6789	-54.6049
289	-56.8269	-57.0767	-61.8395	-58.2534	-56.7611	-54.595
290	-56.6987	-57.0832	-61.8658	-58.3126	-56.7447	-54.4668
291	-56.7677	-57.0701	-61.8986	-58.3487	-56.794	-54.4734
292	-56.6954	-57.0274	-61.8986	-58.4243	-56.8729	-54.4734
293	-56.6987	-56.9419	-61.9118	-58.3947	-56.8104	-54.5391
294	-56.6362	-57.0504	-61.8756	-58.3586	-56.8597	-54.5326
295	-56.5047	-56.9583	-61.9151	-58.4177	-56.8992	-54.5457
296	-56.4324	-56.9518	-61.9808	-58.283	-56.8926	-54.48
297	-56.347	-56.8696	-61.9151	-58.2863	-56.9452	-54.5589
298	-56.2977	-56.9123	-61.9479	-58.1909	-56.9156	-54.572
299	-56.2122	-56.863	-61.9184	-58.283	-56.9846	-54.5983
300	-56.1399	-56.9156	-61.9381	-58.1614	-56.9912	-54.6246
301	-56.0577	-56.886	-61.9348	-58.1712	-56.9912	-54.6377
302	-55.969	-56.909	-61.9414	-58.1153	-57.0865	-54.664
303	-55.9657	-56.8236	-61.9381	-58.0102	-57.0504	-54.6049
304	-55.8112	-56.8466	-61.994	-57.9641	-57.1753	-54.6049
305	-55.7915	-56.8926	-62.0137	-57.836	-57.1424	-54.5819
306	-55.7553	-56.9583	-62.017	-57.7242	-57.1128	-54.5326
307	-55.6304	-56.84	-62.0104	-57.7078	-57.1917	-54.6114
308	-55.6764	-56.8762	-62.0005	-57.5894	-57.1621	-54.5884
309	-55.6173	-56.8893	-61.9414	-57.4152	-57.1884	-54.5786
310	-55.5811	-56.8532	-61.9447	-57.2509	-57.1753	-54.5457
311	-55.5351	-56.8433	-61.9151	-57.195	-57.2081	-54.4964
312	-55.4365	-56.8269	-61.9611	-57.0701	-57.2279	-54.6312
313	-55.4036	-56.8137	-61.8986	-56.9781	-57.2114	-54.6082
314	-55.328	-56.84	-61.8625	-56.8729	-57.2114	-54.549
315	-55.2228	-56.8203	-61.8658	-56.771	-57.2246	-54.5391
316	-55.2853	-56.817	-61.8296	-56.6395	-57.2706	-54.6345
317	-55.1834	-56.8696	-61.7672	-56.5376	-57.31	-54.5194
318	-55.0749	-56.8564	-61.7836	-56.508	-57.3429	-54.549
319	-55.0355	-56.817	-61.8	-56.3601	-57.3692	-54.4964
320	-54.9894	-56.8236	-61.8	-56.3601	-57.3593	-54.4997
321	-54.9632	-56.794	-61.8362	-56.3207	-57.3298	-54.5161
322	-54.9533	-56.7611	-61.8099	-56.2549	-57.3889	-54.5161
323	-54.973	-56.794	-61.7442	-56.2188	-57.4185	-54.5326
324	-54.9599	-56.748	-61.708	-56.2188	-57.4711	-54.526
325	-54.927	-56.7414	-61.7277	-56.1728	-57.5073	-54.4898
326	-54.8547	-56.7118	-61.7474	-56.1695	-57.4382	-54.4668
327	-54.8284	-56.6954	-61.708	-56.1563	-57.4349	-54.4504
328	-54.7035	-56.7677	-61.6883	-55.9985	-57.4941	-54.4438
329	-54.6673	-56.7184	-61.6883	-56.015	-57.4218	-54.4833
330	-54.6049	-56.8071	-61.6817	-56.0018	-57.4448	-54.5063
331	-54.5786	-56.7743	-61.7113	-55.9525	-57.4908	-54.457
332	-54.5556	-56.771	-61.6554	-56.0084	-57.5664	-54.4537
333	-54.503	-56.8564	-61.6751	-56.015	-57.5105	-54.5391
334	-54.4734	-56.8696	-61.7146	-55.9657	-57.4382	-54.4668
335	-54.4142	-56.7808	-61.6916	-55.8769	-57.4317	-54.4471
336	-54.3748	-56.9123	-61.685	-55.923	-57.4941	-54.4142
337	-54.3288	-56.8564	-61.7047	-56.0018	-57.596	-54.3353
338	-54.24	-56.9386	-61.6653	-56.061	-57.4448	-54.286
339	-54.2597	-56.886	-61.6587	-56.0741	-57.5171	-54.3649
340	-54.2565	-56.8334	-61.7573	-56.0709	-57.5303	-54.309
341	-54.1578	-56.8433	-61.685	-56.1366	-57.504	-54.309
342	-54.2039	-56.84	-61.7507	-56.1267	-57.5204	-54.2762
343	-54.102	-56.8039	-61.6948	-56.0446	-57.4974	-54.3156
344	-54.1513	-56.8696	-61.7047	-56.1793	-57.5007	-54.2597
345	-54.194	-56.7841	-61.639	-56.0972	-57.481	-54.2729
346	-54.2072	-56.8137	-61.6455	-55.9492	-57.4087	-54.2335
347	-54.2104	-56.84	-61.639	-55.9032	-57.5105	-54.2466
348	-54.2039	-56.771	-61.6653	-55.9295	-57.3462	-54.2499
349	-54.2072	-56.7874	-61.6653	-55.9197	-57.5007	-54.2236
350	-54.148	-56.8301	-61.6061	-55.8999	-57.481	-54.2236
351	-54.2729	-56.909	-61.639	-55.8802	-57.4974	-54.2269
352	-54.3189	-56.817	-61.5864	-55.7389	-57.458	-54.3025
353	-54.2597	-56.8696	-61.6094	-55.6205	-57.481	-54.3353
354	-54.2663	-56.8334	-61.6587	-55.614	-57.4612	-54.2269
355	-54.3288	-56.932	-61.6127	-55.5252	-57.5204	-54.2565
356	-54.457	-56.9813	-61.6455	-55.3773	-57.4514	-54.3058
357	-54.3978	-56.9057	-61.7277	-55.3116	-57.4514	-54.2072
358	-54.3781	-56.8762	-61.7836	-55.259	-57.3265	-54.2532
359	-54.3945	-56.8827	-61.777	-55.1702	-57.4448	-54.2992
360	-54.3156	-56.8334	-61.7737	-55.0782	-57.4021	-54.2762
361	-54.2269	-56.932	-61.8	-55.019	-57.4514	-54.286
362	-54.2597	-56.8729	-61.7573	-54.95	-57.5303	-54.2663
363	-54.2236	-56.8006	-61.7179	-54.858	-57.4152	-54.2006
364	-54.2236	-56.8071	-61.7474	-54.8087	-57.4941	-54.2072
365	-54.3058	-56.8039	-61.731	-54.7659	-57.5237	-54.217
366	-54.2039	-56.8269	-61.8033	-54.7659	-57.4087	-54.125
367	-54.1513	-56.7447	-61.7869	-54.7594	-57.4481	-54.2729
368	-54.263	-56.8433	-61.7967	-54.5819	-57.4842	-54.2893
369	-54.3058	-56.817	-61.7277	-54.4208	-57.4744	-54.2367
370	-54.2203	-56.6921	-61.6653	-54.2762	-57.4612	-54.1644
371	-54.1578	-56.748	-61.7244	-54.2696	-57.458	-54.2302
372	-54.1644	-56.6822	-61.7902	-54.1118	-57.4087	-54.1447
373	-54.0428	-56.7611	-61.8	-53.9672	-57.3889	-54.1447
374	-54.079	-56.6724	-61.8165	-53.7305	-57.4284	-54.1151
375	-53.9639	-56.7381	-61.8756	-53.1455	-57.4349	-54.0888
376	-53.9475	-56.6954	-61.7573	-52.4388	-57.4021	-54.1447
377	-54.0132	-56.725	-61.8855	-51.7781	-57.458	-54.0724
378	-53.862	-56.7184	-61.8855	-51.2588	-57.4908	-54.1184
379	-53.8324	-56.702	-61.9118	-50.8117	-57.527	-54.0625
380	-53.7766	-56.7184	-61.8559	-50.5488	-57.4875	-54.0461
381	-53.7141	-56.748	-61.8263	-50.5685	-57.527	-54.0987
382	-53.6484	-56.7447	-61.8658	-50.7263	-57.6486	-54.0921
383	-53.5958	-56.6822	-61.9184	-50.8512	-57.6256	-54.0231
384	-53.5629	-56.6494	-61.846	-51.101	-57.6223	-54.0658
385	-53.6122	-56.5573	-61.971	-51.1897	-57.6453	-54.0001
386	-53.4051	-56.5672	-61.9479	-51.3541	-57.6124	-54.0231
387	-53.4676	-56.577	-62.0268	-51.6368	-57.5894	-54.0001
388	-53.3361	-56.5442	-62.0729	-51.7419	-57.6848	-54.0494
389	-53.2572	-56.4719	-62.0137	-51.995	-57.7143	-54.0066
390	-53.2671	-56.5277	-62.0301	-52.1101	-57.7143	-54.0001
391	-53.2737	-56.5179	-61.9907	-52.3533	-57.6683	-54.0034
392	-53.2506	-56.416	-62.0597	-52.4552	-57.7373	-54.0099
393	-53.1356	-56.462	-62.0433	-52.6196	-57.7834	-54.0395
394	-53.0173	-56.3634	-61.9479	-52.8891	-57.7012	-53.9508
395	-52.8661	-56.4127	-61.9841	-52.9713	-57.7406	-53.9508
396	-52.304	-56.3207	-62.0104	-53.1257	-57.7045	-53.9935
397	-51.6039	-56.3568	-62.0827	-53.1948	-57.7604	-53.9606
398	-51.0648	-56.2615	-62.1024	-53.2835	-57.8097	-53.9705
399	-50.5586	-56.347	-62.0268	-53.4446	-57.7308	-53.9705
400	-50.0985	-56.3831	-62.0235	-53.4807	-57.8162	-54.0132
401	-49.9078	-56.3634	-61.9973	-53.5761	-57.7702	-54.0395
402	-49.8815	-56.3667	-62.0038	-53.6188	-57.7209	-53.9442
403	-50.0097	-56.3667	-61.8756	-53.6648	-57.7209	-53.9804
404	-50.1379	-56.3963	-61.9019	-53.77	-57.8097	-54.0329
405	-50.3844	-56.4653	-61.8395	-53.9245	-57.8557	-53.9606
406	-50.6277	-56.4587	-61.8625	-53.9212	-57.8655	-53.9836
407	-50.7822	-56.4982	-61.8789	-54.0691	-57.9017	-53.9573
408	-51.0484	-56.5409	-61.7639	-54.1348	-57.905	-54.0395
409	-51.1569	-56.5935	-61.8132	-54.1513	-57.9247	-53.9804
410	-51.3508	-56.6231	-61.8559	-54.2433	-58.0003	-54.0066
411	-51.5184	-56.577	-61.846	-54.3025	-57.9116	-54.0231
412	-51.6762	-56.6461	-61.8428	-54.2828	-57.8885	-54.0461
413	-51.8701	-56.6724	-61.7705	-54.3518	-57.9083	-54.0001
414	-52.0115	-56.6855	-61.662	-54.526	-57.951	-54.0264
415	-52.1692	-56.771	-61.6291	-54.618	-58.0069	-53.9705
416	-52.3172	-56.7217	-61.6521	-54.6246	-58.0134	-53.9804
417	-52.4453	-56.6954	-61.6587	-54.664	-57.9181	-54.0231
418	-52.5111	-56.7348	-61.7146	-54.6345	-57.8458	-54.0198
419	-52.5998	-56.7447	-61.6127	-54.6016	-57.8294	-54.0198
420	-52.705	-56.8203	-61.6094	-54.6739	-57.8787	-53.9869
421	-52.7773	-56.725	-61.6948	-54.6772	-57.7406	-54.079
422	-52.9581	-56.8203	-61.6324	-54.7002	-57.813	-54.056
423	-52.8825	-56.7973	-61.6521	-54.7561	-57.7406	-54.1184
424	-52.9811	-56.8926	-61.708	-54.8744	-57.711	-54.056
425	-53.0008	-56.8959	-61.6521	-54.8613	-57.8162	-54.1283
426	-53.1619	-56.8433	-61.5765	-54.9533	-57.7143	-54.1611
427	-53.1192	-56.8532	-61.5798	-55.0289	-57.7604	-54.2367
428	-53.2276	-56.8334	-61.6521	-55.0552	-57.7735	-54.1381
429	-53.2309	-56.7677	-61.6686	-55.0059	-57.7834	-54.1611
430	-53.3098	-56.7808	-61.6193	-55.1176	-57.7636	-54.1118
431	-53.3657	-56.9025	-61.6751	-55.1439	-57.7143	-54.1381
432	-53.3526	-56.9386	-61.6061	-55.2623	-57.7899	-54.1184
433	-53.5268	-56.9945	-61.5469	-55.3017	-57.8261	-54.1874
434	-53.5465	-56.9879	-61.4746	-55.4069	-57.7604	-54.0823
435	-53.5037	-56.9715	-61.5108	-55.443	-57.7209	-54.1151
436	-53.5366	-57.0175	-61.4516	-55.5844	-57.7998	-54.079
437	-53.6056	-56.9748	-61.3793	-55.5285	-57.8425	-54.1348
438	-53.6286	-57.0537	-61.3399	-55.6863	-57.7932	-54.1874
439	-53.7536	-57.0865	-61.4385	-55.729	-57.7571	-54.2335
440	-53.8226	-57.1161	-61.4122	-55.8408	-57.7834	-54.1743
441	-53.8587	-57.1457	-61.3596	-55.9854	-57.7669	-54.1611
442	-53.8949	-57.2344	-61.4385	-55.9558	-57.7373	-54.0395
443	-53.8752	-57.2081	-61.3103	-56.0314	-57.7406	-54.102
444	-53.8752	-57.1818	-61.3662	-56.038	-57.7373	-54.1874
445	-53.908	-57.218	-61.3431	-56.1432	-57.6289	-54.1283
446	-53.9179	-57.1917	-61.3563	-56.1793	-57.5993	-54.1217
447	-53.9705	-57.2213	-61.3957	-56.2681	-57.5763	-54.102
448	-54.0034	-57.1786	-61.3694	-56.3075	-57.4908	-54.0625
449	-54.1283	-57.2081	-61.4483	-56.3535	-57.5237	-54.1348
450	-54.1447	-57.1884	-61.4253	-56.462	-57.5434	-54.1743
451	-54.2269	-57.1424	-61.4352	-56.4456	-57.4678	-54.1414
452	-54.3025	-57.2081	-61.4582	-56.4686	-57.4908	-54.125
453	-54.3222	-57.1391	-61.3629	-56.554	-57.5303	-54.0888
454	-54.2992	-57.1621	-61.2906	-56.6231	-57.527	-54.125
455	-54.2302	-57.172	-61.307	-56.7874	-57.5138	-54.0954
456	-54.2729	-57.2147	-61.2741	-56.7776	-57.504	-54.0691
457	-54.3353	-57.2607	-61.2577	-56.7677	-57.4612	-54.1283
458	-54.4865	-57.172	-61.2643	-56.771	-57.5599	-54.079
459	-54.4898	-57.1786	-61.2643	-56.7545	-57.5434	-54.1283
460	-54.5983	-57.1556	-61.3037	-56.84	-57.4514	-54.0888
461	-54.6838	-57.1556	-61.2544	-56.8071	-57.4087	-54.1217
462	-54.7133	-57.1424	-61.2347	-56.8696	-57.4317	-54.1348
463	-54.7462	-57.1128	-61.261	-56.9123	-57.5138	-54.148
464	-54.7627	-57.057	-61.3234	-57.0668	-57.4711	-54.1184
465	-54.7725	-57.0635	-61.284	-57.149	-57.5073	-54.1546
466	-54.8514	-56.9748	-61.2807	-57.195	-57.5434	-54.1644
467	-54.8021	-56.8827	-61.3464	-57.2509	-57.5697	-54.1513
468	-54.8876	-56.932	-61.2906	-57.3429	-57.5566	-54.2072
469	-54.8974	-56.9353	-61.2412	-57.3199	-57.6091	-54.2072
470	-54.9434	-56.932	-61.2643	-57.3824	-57.5237	-54.2006
471	-54.9894	-56.886	-61.33	-57.4349	-57.6026	-54.148
472	-54.9796	-56.8729	-61.376	-57.596	-57.5073	-54.2104
473	-54.9796	-56.8597	-61.3431	-57.6256	-57.5927	-54.24
474	-55.0125	-56.886	-61.3431	-57.7571	-57.5796	-54.2499
475	-55.1144	-56.817	-61.4188	-57.6552	-57.5894	-54.2499
476	-55.0552	-56.7677	-61.4089	-57.6552	-57.6453	-54.2137
477	-55.1078	-56.7315	-61.3464	-57.7571	-57.5368	-54.2828
478	-55.1111	-56.7052	-61.3629	-57.7143	-57.5533	-54.2926
479	-55.2623	-56.6789	-61.376	-57.6815	-57.5533	-54.3123
480	-55.2261	-56.725	-61.4188	-57.7275	-57.5697	-54.3353
481	-55.3116	-56.6954	-61.4122	-57.6486	-57.5566	-54.3288
482	-55.374	-56.6888	-61.4319	-57.7636	-57.5434	-54.3715
483	-55.4365	-56.6132	-61.4582	-57.6519	-57.527	-54.2006
484	-55.3773	-56.6757	-61.4155	-57.6617	-57.527	-54.263
485	-55.4595	-56.6428	-61.4516	-57.711	-57.5237	-54.263
486	-55.5712	-56.6822	-61.376	-57.7965	-57.6091	-54.1644
487	-55.6008	-56.6198	-61.5535	-57.8097	-57.4908	-54.1611
488	-55.6008	-56.5606	-61.5371	-57.8491	-57.4744	-54.2663
489	-55.6403	-56.4982	-61.5108	-57.9017	-57.5105	-54.2466
490	-55.66	-56.5113	-61.5305	-57.859	-57.5631	-54.2926
491	-55.7882	-56.4817	-61.5141	-57.9313	-57.4974	-54.3222
492	-55.8671	-56.5277	-61.4713	-57.9806	-57.5664	-54.2433
493	-55.9098	-56.5179	-61.445	-57.8984	-57.4448	-54.2466
494	-55.9953	-56.5672	-61.5009	-57.9411	-57.5401	-54.1546
495	-56.0511	-56.6362	-61.4681	-57.9181	-57.5631	-54.217
496	-56.0248	-56.5442	-61.5141	-57.974	-57.5138	-54.2762
497	-56.061	-56.577	-61.445	-57.9674	-57.596	-54.2137
498	-56.0906	-56.4653	-61.4582	-57.9379	-57.5697	-54.2137
499	-56.2221	-56.5277	-61.4056	-58.0299	-57.5861	-54.2137
500	-56.2023	-56.5146	-61.4188	-58.0397	-57.5664	-54.2039
501	-56.2221	-56.5606	-61.4943	-58.0496	-57.6091	-54.1809
502	-56.2385	-56.5014	-61.4286	-58.0759	-57.5927	-54.1578
503	-56.2319	-56.5179	-61.5042	-58.2271	-57.573	-54.1348
504	-56.3371	-56.4686	-61.4122	-58.1121	-57.5993	-54.2367
505	-56.2845	-56.3765	-61.3892	-58.1647	-57.4908	-54.2795
506	-56.3272	-56.462	-61.3892	-58.1088	-57.5204	-54.2893
507	-56.3535	-56.4226	-61.2741	-58.1679	-57.5073	-54.2762
508	-56.3798	-56.4226	-61.3103	-58.1285	-57.5796	-54.2696
509	-56.3305	-56.485	-61.261	-58.1351	-57.6387	-54.2959
510	-56.3075	-56.462	-61.2248	-58.1647	-57.6124	-54.3025
511	-56.2911	-56.37	-61.2774	-58.0792	-57.6289	-54.3781
512	-56.2549	-56.3897	-61.2643	-58.0858	-57.619	-54.3452
513	-56.2714	-56.439	-61.2412	-58.1482	-57.6124	-54.2959
514	-56.2714	-56.4587	-61.1328	-58.2008	-57.6354	-54.3814
515	-56.3338	-56.4061	-61.2215	-58.2534	-57.55	-54.3847
516	-56.4423	-56.5245	-61.1854	-58.2271	-57.5204	-54.3715
517	-56.3996	-56.4982	-61.2281	-58.3389	-57.4777	-54.4307
518	-56.4949	-56.4916	-61.2182	-58.4572	-57.4678	-54.4208
519	-56.4982	-56.4752	-61.2577	-58.352	-57.3758	-54.4142
520	-56.5376	-56.485	-61.2117	-58.5262	-57.4054	-54.3879
521	-56.5245	-56.4653	-61.2018	-58.4276	-57.3298	-54.3847
522	-56.5442	-56.4456	-61.1755	-58.5394	-57.4547	-54.3847
523	-56.5705	-56.554	-61.0769	-58.5854	-57.3889	-54.4011
524	-56.6296	-56.5113	-61.1591	-58.5821	-57.3396	-54.4011
525	-56.6691	-56.5935	-61.1262	-58.5065	-57.3626	-54.3485
526	-56.6395	-56.5343	-61.0868	-58.6906	-57.3495	-54.4405
527	-56.6789	-56.5639	-61.1098	-58.6807	-57.3331	-54.3847
528	-56.8071	-56.5277	-61.0342	-58.7037	-57.3166	-54.3781
529	-56.7545	-56.4324	-61.1394	-58.7497	-57.287	-54.4537
530	-56.771	-56.5869	-61.1295	-58.7925	-57.2706	-54.3748
531	-56.7644	-56.6559	-61.0473	-58.7399	-57.2344	-54.3551
532	-56.7743	-56.6822	-61.1262	-58.7826	-57.2673	-54.3584
533	-56.748	-56.6592	-61.0933	-58.7793	-57.1523	-54.3321
534	-56.7611	-56.6559	-61.1525	-58.7596	-57.103	-54.2893
535	-56.8071	-56.6395	-61.1459	-58.8582	-57.0865	-54.2532
536	-56.7677	-56.6296	-61.1919	-58.8451	-56.9748	-54.3025
537	-56.8532	-56.6822	-61.1196	-58.8516	-57.0274	-54.2696
538	-56.8367	-56.6888	-61.1032	-58.9174	-57.0043	-54.3123
539	-56.886	-56.6362	-61.1163	-58.8944	-56.8992	-54.2565
540	-56.909	-56.7282	-61.1262	-58.9141	-56.7874	-54.263
541	-56.9616	-56.6395	-61.0736	-58.9141	-56.7841	-54.2367
542	-57.0339	-56.5672	-61.021	-58.97	-56.6428	-54.3288
543	-57.0339	-56.531	-61.0638	-59.0423	-56.5508	-54.3485
544	-57.0011	-56.6165	-61.0572	-59.131	-56.4883	-54.2828
545	-56.9978	-56.6099	-60.9849	-59.0981	-56.3963	-54.2696
546	-57.1293	-56.5935	-60.9783	-59.0094	-56.2779	-54.2466
547	-57.1194	-56.6329	-60.9717	-59.1474	-56.1629	-54.217
548	-57.149	-56.6165	-60.9421	-59.1672	-56.0544	-54.2236
549	-57.2147	-56.6362	-60.9454	-59.1244	-56.0248	-54.2499
550	-57.2312	-56.5902	-61.1098	-59.1277	-55.8999	-54.2696
551	-57.2673	-56.6198	-60.9783	-59.2066	-55.8079	-54.2762
552	-57.1654	-56.6461	-61.021	-59.1409	-55.798	-54.3058
553	-57.2312	-56.6329	-60.9849	-59.2461	-55.5614	-54.3255
554	-57.2574	-56.6066	-60.8928	-59.2658	-55.5943	-54.3748
555	-57.2969	-56.5836	-60.9487	-59.2494	-55.5417	-54.3682
556	-57.2739	-56.5146	-60.9914	-59.2494	-55.4628	-54.4142
557	-57.2542	-56.531	-60.8632	-59.3907	-55.4398	-54.4405
558	-57.3561	-56.6264	-60.8764	-59.486	-55.3543	-54.4044
559	-57.3692	-56.6724	-60.8731	-59.6109	-55.2919	-54.3748
560	-57.3593	-56.5935	-60.8271	-59.6536	-55.236	-54.3978
561	-57.4087	-56.531	-60.7811	-59.7523	-55.1735	-54.3353
562	-57.4185	-56.6494	-60.7022	-59.6799	-55.1702	-54.3781
563	-57.4645	-56.7052	-60.7088	-59.7588	-55.0289	-54.3748
564	-57.4087	-56.6921	-60.6858	-59.749	-55.019	-54.4734
565	-57.5007	-56.6494	-60.5937	-59.8541	-54.9894	-54.4208
566	-57.5894	-56.6494	-60.574	-59.818	-54.8974	-54.3814
567	-57.504	-56.7184	-60.5148	-59.8081	-54.8876	-54.4405
568	-57.5401	-56.725	-60.5346	-59.9429	-54.8613	-54.4931
569	-57.5631	-56.7545	-60.4885	-59.9363	-54.8152	-54.4931
570	-57.5566	-56.7841	-60.4327	-59.8213	-54.8382	-54.5096
571	-57.5566	-56.7447	-60.3899	-59.8213	-54.7627	-54.4865
572	-57.573	-56.6954	-60.3012	-59.7983	-54.7331	-54.4865
573	-57.5533	-56.7743	-60.334	-59.7753	-54.7199	-54.4865
574	-57.6848	-56.7118	-60.2716	-59.818	-54.6542	-54.4077
575	-57.6617	-56.7513	-60.2519	-59.8772	-54.6147	-54.4208
576	-57.6716	-56.6691	-60.2091	-59.8541	-54.6114	-54.3912
577	-57.6059	-56.6724	-60.1072	-59.7884	-54.5917	-54.4635
578	-57.6256	-56.6362	-60.1631	-59.8246	-54.5326	-54.5391
579	-57.6059	-56.6132	-60.127	-59.8147	-54.4898	-54.4471
580	-57.5073	-56.577	-60.0974	-59.8804	-54.4307	-54.4767
581	-57.5434	-56.6066	-60.1467	-59.9922	-54.4175	-54.4241
582	-57.504	-56.6231	-60.0678	-60.0678	-54.3879	-54.457
583	-57.4547	-56.6527	-60.0251	-59.9955	-54.3814	-54.457
584	-57.4547	-56.5212	-59.9856	-60.0054	-54.4339	-54.4537
585	-57.5138	-56.5935	-59.9002	-59.9922	-54.3978	-54.4109
586	-57.458	-56.5606	-59.9823	-59.9265	-54.3715	-54.4767
587	-57.3955	-56.5738	-59.8673	-59.9823	-54.3715	-54.5819
588	-57.3791	-56.508	-59.8541	-59.9692	-54.4339	-54.4668
589	-57.3725	-56.5639	-59.8837	-60.081	-54.4931	-54.5819
590	-57.2903	-56.5902	-59.8903	-60.1861	-54.503	-54.6213
591	-57.2969	-56.6296	-59.7983	-60.2026	-54.4109	-54.6377
592	-57.3495	-56.5606	-59.841	-60.3373	-54.3682	-54.6246
593	-57.264	-56.5277	-59.7654	-60.4129	-54.263	-54.4964
594	-57.1983	-56.5606	-59.6997	-60.4129	-54.3156	-54.5654
595	-57.1588	-56.6066	-59.7194	-60.3768	-54.3616	-54.5457
596	-57.1687	-56.5212	-59.7457	-60.3965	-54.2729	-54.5556
597	-57.1227	-56.5376	-59.8081	-60.4359	-54.2926	-54.5161
598	-57.0898	-56.5475	-59.7325	-60.2847	-54.2729	-54.6114
599	-57.0865	-56.5573	-59.7391	-60.3439	-54.2532	-54.5819
600	-56.9912	-56.5014	-59.8016	-60.2256	-54.3058	-54.6805
601	-57.0307	-56.5212	-59.7161	-60.1993	-54.2696	-54.6377
602	-57.0274	-56.4521	-59.6438	-60.2124	-54.2565	-54.5884
603	-56.9485	-56.4653	-59.7292	-60.2256	-54.2433	-54.6279
604	-56.9682	-56.4916	-59.772	-60.2124	-54.2269	-54.7396
605	-56.9025	-56.5014	-59.7884	-60.3045	-54.24	-54.8021
606	-56.932	-56.5245	-59.8344	-60.2387	-54.2663	-54.8481
607	-56.8827	-56.4521	-59.887	-60.3308	-54.1611	-54.8317
608	-56.8564	-56.4357	-59.8081	-60.2683	-54.2104	-54.9138
609	-56.8597	-56.462	-59.8607	-60.2979	-54.24	-54.95
610	-56.7381	-56.4489	-59.8509	-60.3045	-54.1973	-55.0716
611	-56.6559	-56.5047	-59.9232	-60.2223	-54.2532	-55.1045
612	-56.5869	-56.5475	-59.8903	-60.3045	-54.1874	-55.1998
613	-56.577	-56.5047	-59.8804	-60.3143	-54.1184	-55.2458
614	-56.5343	-56.5146	-59.9002	-60.265	-54.125	-55.2557
615	-56.4949	-56.5803	-59.7917	-60.3406	-54.0691	-55.3675
616	-56.4127	-56.5968	-59.9002	-60.2749	-54.0921	-55.3412
617	-56.3667	-56.5343	-59.887	-60.3308	-54.0099	-55.5154
618	-56.2845	-56.5803	-59.9265	-60.3505	-54.0198	-55.4825
619	-56.2911	-56.6165	-59.956	-60.3505	-53.9606	-55.5022
620	-56.2516	-56.6001	-59.9922	-60.2946	-54.0592	-55.5187
621	-56.2779	-56.5902	-60.0086	-60.3176	-53.9409	-55.7257
622	-56.2451	-56.5277	-60.0185	-60.2946	-53.9935	-55.7717
623	-56.199	-56.4949	-60.0908	-60.3505	-53.9639	-55.8013
624	-56.2253	-56.5343	-60.0086	-60.2683	-53.9212	-55.8506
625	-56.1859	-56.6099	-59.9791	-60.2387	-53.8785	-55.9197
626	-56.176	-56.5803	-60.0579	-60.4064	-53.7897	-55.9722
627	-56.0873	-56.577	-60.0875	-60.3373	-53.8554	-56.0544
628	-56.0577	-56.5738	-59.9823	-60.4096	-53.8554	-56.0248
629	-55.9788	-56.6724	-60.0974	-60.3209	-53.8489	-56.1399
630	-55.9164	-56.5475	-60.0711	-60.3143	-53.7864	-56.1234
631	-55.8506	-56.6559	-60.0711	-60.311	-53.7207	-56.1925
632	-55.7717	-56.5902	-60.1105	-60.3472	-53.6878	-56.2155
633	-55.7783	-56.6264	-60.1434	-60.334	-53.6484	-56.2056
634	-55.7422	-56.6033	-60.1204	-60.288	-53.6615	-56.1793
635	-55.637	-56.6099	-60.2289	-60.3834	-53.6451	-56.3042
636	-55.6501	-56.5442	-60.081	-60.4129	-53.6254	-56.2746
637	-55.5548	-56.5014	-60.2059	-60.4064	-53.5498	-56.347
638	-55.4628	-56.5475	-60.1828	-60.4557	-53.5268	-56.4686
639	-55.3872	-56.5212	-60.1598	-60.4425	-53.5136	-56.508
640	-55.3806	-56.5245	-60.1927	-60.4162	-53.5366	-56.554
641	-55.3116	-56.531	-60.1861	-60.3636	-53.5235	-56.6001
642	-55.2228	-56.4982	-60.1664	-60.3998	-53.5005	-56.5672
643	-55.1768	-56.4489	-60.2256	-60.4327	-53.3	-56.6527
644	-55.0552	-56.4587	-60.2157	-60.5641	-53.3526	-56.6855
645	-55.0782	-56.3503	-60.2453	-60.5017	-53.2638	-56.6888
646	-55.1308	-56.508	-60.242	-60.4491	-53.2737	-56.7513
647	-55.1209	-56.3831	-60.219	-60.4688	-53.3131	-56.817
648	-54.9697	-56.3568	-60.2453	-60.4557	-53.2769	-56.771
649	-54.9369	-56.3963	-60.2256	-60.3998	-53.3361	-56.8729
650	-54.858	-56.3108	-60.2683	-60.4064	-53.2145	-56.9649
651	-54.8382	-56.3108	-60.3209	-60.3735	-53.2211	-57.0307
652	-54.7594	-56.3733	-60.288	-60.3209	-53.3164	-57.0602
653	-54.7429	-56.2714	-60.3373	-60.3078	-53.1981	-57.1457
654	-54.6082	-56.2253	-60.3702	-60.265	-53.2572	-57.1194
655	-54.5917	-56.2418	-60.4096	-60.1664	-53.3197	-57.2213
656	-54.5194	-56.2911	-60.5148	-60.1697	-53.2769	-57.2509
657	-54.4142	-56.2845	-60.4688	-60.1303	-53.2868	-57.3035
658	-54.3584	-56.2516	-60.482	-60.0514	-53.3723	-57.2969
659	-54.3255	-56.2253	-60.4129	-59.9725	-53.4281	-57.3199
660	-54.3058	-56.2352	-60.4622	-59.9166	-53.4807	-57.3396
661	-54.2926	-56.2746	-60.459	-59.9232	-53.4314	-57.2936
662	-54.286	-56.2714	-60.551	-59.864	-53.3887	-57.3429
663	-54.2433	-56.2385	-60.5773	-59.8673	-53.369	-57.3199
664	-54.24	-56.2319	-60.5477	-59.8081	-53.415	-57.3626
665	-54.1316	-56.2845	-60.5806	-59.7457	-53.3986	-57.3824
666	-54.1348	-56.2352	-60.551	-59.6931	-53.3493	-57.4054
667	-54.0494	-56.2812	-60.5641	-59.7292	-53.4742	-57.4119
668	-54.0527	-56.2516	-60.5608	-59.7358	-53.4281	-57.4317
669	-53.9245	-56.2385	-60.5839	-59.5485	-53.4019	-57.4711
670	-53.9245	-56.2812	-60.6858	-59.6931	-53.4544	-57.4908
671	-54.0034	-56.324	-60.7022	-59.5846	-53.5826	-57.4382
672	-53.9179	-56.2779	-60.6956	-59.6043	-53.4939	-57.527
673	-53.8686	-56.199	-60.7252	-59.5682	-53.507	-57.5664
674	-53.8719	-56.1465	-60.7515	-59.5682	-53.5892	-57.5796
675	-53.8423	-56.2089	-60.8074	-59.5485	-53.5826	-57.573
676	-53.8193	-56.1958	-60.8008	-59.5748	-53.53	-57.6716
677	-53.8357	-56.1465	-60.8632	-59.5682	-53.6024	-57.6683
678	-53.7634	-56.1037	-60.9454	-59.532	-53.5761	-57.6552
679	-53.678	-56.1662	-60.86	-59.5287	-53.5925	-57.7439
680	-53.747	-56.2056	-60.9487	-59.5517	-53.6549	-57.6716
681	-53.6878	-56.1826	-60.8928	-59.417	-53.6221	-57.8031
682	-53.5991	-56.1103	-60.929	-59.3611	-53.7042	-57.7768
683	-53.5728	-56.0676	-61.0802	-59.4531	-53.6451	-57.8195
684	-53.5596	-56.0676	-61.0473	-59.3841	-53.6418	-57.9083
685	-53.4249	-56.0413	-61.0079	-59.348	-53.6845	-57.8885
686	-53.3394	-56.13	-61.0309	-59.2789	-53.6747	-57.9247
687	-53.3493	-56.107	-61.1098	-59.3775	-53.6582	-57.9543
688	-53.3657	-56.084	-61.1426	-59.3151	-53.6648	-57.8853
689	-53.3065	-56.107	-61.2215	-59.2526	-53.6484	-57.997
690	-53.2638	-56.153	-61.2675	-59.2658	-53.6911	-57.9773
691	-53.2178	-56.0676	-61.1854	-59.3447	-53.6944	-58.0233
692	-53.129	-56.038	-61.2774	-59.2329	-53.7437	-57.9773
693	-53.014	-56.0281	-61.353	-59.2198	-53.724	-57.9937
694	-52.9154	-55.8967	-61.3859	-59.1935	-53.6747	-58.0628
695	-52.8891	-55.9361	-61.3727	-59.2987	-53.6286	-58.0332
696	-52.7149	-55.8901	-61.4549	-59.2724	-53.6451	-58.02
697	-52.6952	-55.7948	-61.4878	-59.394	-53.6812	-58.1351
698	-52.5341	-55.8178	-61.5502	-59.4203	-53.6385	-58.1153
699	-52.4026	-55.7816	-61.6193	-59.4236	-53.6056	-58.0397
700	-51.8175	-55.752	-61.5239	-59.4301	-53.5925	-58.0956
701	-51.1963	-55.7619	-61.5075	-59.5386	-53.6155	-58.1055
702	-50.6112	-55.7257	-61.6225	-59.463	-53.5465	-58.1449
703	-49.9867	-55.7487	-61.5305	-59.4663	-53.438	-58.1679
704	-49.4312	-55.7422	-61.6061	-59.5386	-53.5399	-58.2041
705	-49.1683	-55.706	-61.5634	-59.5715	-53.5859	-58.1712
706	-49.0762	-55.6961	-61.5502	-59.5945	-53.5563	-58.1778
707	-49.1452	-55.6896	-61.4878	-59.5846	-53.4643	-58.1647
708	-49.2603	-55.6961	-61.4976	-59.6274	-53.4939	-58.2863
709	-49.349	-55.5712	-61.4911	-59.6602	-53.4873	-58.2205
710	-49.543	-55.5482	-61.4878	-59.6668	-53.4873	-58.3849
711	-49.5956	-55.6041	-61.4812	-59.6635	-53.4183	-58.3652
712	-49.7303	-55.5877	-61.5042	-59.7161	-53.4446	-58.3783
713	-49.9505	-55.5877	-61.4582	-59.7555	-53.4939	-58.4112
714	-50.1313	-55.6107	-61.4779	-59.7194	-53.5399	-58.4671
715	-50.3318	-55.5219	-61.4155	-59.7062	-53.4676	-58.4835
716	-50.4206	-55.5614	-61.5141	-59.7555	-53.4314	-58.4966
717	-50.5291	-55.5811	-61.4779	-59.7851	-53.484	-58.5854
718	-50.8052	-55.5515	-61.5075	-59.8509	-53.4972	-58.5394
719	-50.9268	-55.4989	-61.4319	-59.726	-53.5465	-58.6183
720	-50.9695	-55.5088	-61.4779	-59.7325	-53.4347	-58.5952
721	-50.9925	-55.4595	-61.4812	-59.749	-53.5005	-58.569
722	-51.124	-55.5811	-61.5732	-59.7457	-53.484	-58.5985
723	-51.2719	-55.5712	-61.5469	-59.6865	-53.5859	-58.6413
724	-51.3672	-55.5417	-61.5732	-59.8114	-53.5037	-58.6183
725	-51.5447	-55.6698	-61.593	-59.7785	-53.5005	-58.6248
726	-51.5283	-55.5975	-61.5962	-59.7621	-53.438	-58.6873
727	-51.5414	-55.5285	-61.6193	-59.7654	-53.4906	-58.6906
728	-51.5875	-55.4956	-61.5831	-59.8936	-53.4807	-58.7333
729	-51.6039	-55.443	-61.5995	-59.841	-53.5169	-58.661
730	-51.7584	-55.4332	-61.6357	-59.8772	-53.5465	-58.6873
731	-51.8143	-55.4529	-61.616	-59.7884	-53.5399	-58.707
732	-51.857	-55.4562	-61.6423	-59.841	-53.5169	-58.6939
733	-51.8734	-55.4036	-61.6028	-59.9725	-53.6418	-58.7366
734	-51.8438	-55.2853	-61.5864	-59.956	-53.5991	-58.7366
735	-51.9654	-55.2787	-61.6718	-59.9922	-53.5826	-58.7037
736	-51.9852	-55.2458	-61.5798	-60.0481	-53.6812	-58.7464
737	-52.0246	-55.2031	-61.5798	-60.0251	-53.7075	-58.7826
738	-52.1199	-55.1472	-61.6554	-60.0678	-53.6089	-58.7136
739	-52.1002	-55.1834	-61.6554	-60.0711	-53.5728	-58.6939
740	-52.0411	-55.2097	-61.5995	-59.9429	-53.6188	-58.6873
741	-52.0213	-55.1702	-61.5798	-60.0152	-53.6648	-58.684
742	-52.0443	-55.2195	-61.5798	-60.0645	-53.6517	-58.661
743	-52.0772	-55.1374	-61.5667	-60.127	-53.6517	-58.6281
744	-52.1199	-55.1275	-61.5272	-60.1533	-53.7042	-58.7497
745	-52.2021	-55.1472	-61.5338	-60.2617	-53.6714	-58.7333
746	-52.2481	-55.0782	-61.5437	-60.2749	-53.5892	-58.6741
747	-52.3369	-55.0125	-61.5765	-60.2124	-53.6911	-58.7497
748	-52.2909	-54.9599	-61.6094	-60.2486	-53.6352	-58.6643
749	-52.4059	-54.973	-61.5141	-60.1861	-53.7568	-58.6873
750	-52.4355	-54.9927	-61.5667	-60.1993	-53.7371	-58.7037
751	-52.3599	-55.019	-61.5239	-60.2223	-53.7503	-58.7662
752	-52.4979	-54.9401	-61.5141	-60.2453	-53.6977	-58.7399
753	-52.4946	-55.0157	-61.4746	-60.2552	-53.6812	-58.8451
754	-52.5111	-54.996	-61.5798	-60.2354	-53.6747	-58.7629
755	-52.59	-55.0223	-61.6291	-60.2256	-53.6714	-58.7267
756	-52.4815	-54.973	-61.6094	-60.1072	-53.7371	-58.7136
757	-52.5209	-55.0157	-61.6324	-60.1335	-53.6845	-58.7464
758	-52.4092	-55.0815	-61.5995	-60.1171	-53.7568	-58.7694
759	-52.4256	-55.0092	-61.6258	-60.0908	-53.6418	-58.7662
760	-52.3763	-55.0486	-61.6488	-59.9988	-53.6615	-58.9042
761	-52.4289	-54.9894	-61.6817	-59.9659	-53.6944	-58.8451
762	-52.4421	-54.9467	-61.7179	-59.8246	-53.7108	-58.9141
763	-52.4355	-55.0322	-61.754	-59.795	-53.6418	-58.9075
764	-52.4223	-54.9664	-61.6817	-59.7917	-53.6845	-58.97
765	-52.4158	-54.9664	-61.7277	-59.726	-53.7207	-58.9502
766	-52.4322	-55.0683	-61.7113	-59.7358	-53.7042	-58.9667
767	-52.5045	-55.065	-61.7409	-59.7227	-53.7174	-58.9272
768	-52.4519	-55.0585	-61.639	-59.7654	-53.7897	-58.9634
769	-52.4388	-55.042	-61.731	-59.6799	-53.816	-58.9831
770	-52.4749	-55.0946	-61.6883	-59.7523	-53.8259	-58.9535
771	-52.4782	-55.0618	-61.7277	-59.5682	-53.8094	-58.8976
772	-52.5834	-55.0979	-61.7606	-59.6175	-53.77	-58.9667
773	-52.5538	-55.1012	-61.7869	-59.6438	-53.7996	-58.9535
774	-52.6261	-55.0913	-61.777	-59.578	-53.7996	-58.9437
775	-52.6919	-55.0848	-61.6981	-59.6438	-53.7733	-58.9798
776	-52.6787	-55.1341	-61.7606	-59.6306	-53.7338	-59.0094
777	-52.7182	-55.0683	-61.7639	-59.6339	-53.6582	-59.0324
778	-52.7642	-55.1341	-61.6948	-59.5912	-53.6517	-58.9502
779	-52.7938	-55.0749	-61.6455	-59.5715	-53.6615	-58.9535
780	-52.8661	-55.042	-61.6193	-59.5715	-53.6681	-58.9272
781	-52.9088	-55.1209	-61.6916	-59.6076	-53.6911	-58.9305
782	-52.9022	-55.0881	-61.6587	-59.5287	-53.6911	-58.9272
783	-52.8858	-55.1176	-61.6948	-59.6241	-53.6286	-58.9075
784	-52.945	-55.1209	-61.6817	-59.5846	-53.6254	-58.9108
785	-52.8102	-55.1078	-61.6455	-59.6109	-53.678	-58.9765
786	-52.8562	-55.0848	-61.7014	-59.6208	-53.5958	-58.9009
787	-52.7379	-55.2064	-61.639	-59.5879	-53.5432	-58.9207
788	-52.6689	-55.1768	-61.6916	-59.6405	-53.5432	-59.0949
789	-52.7149	-55.1669	-61.7442	-59.6142	-53.5761	-59.0784
790	-52.7576	-55.2097	-61.6817	-59.6569	-53.4972	-59.0456
791	-52.7905	-55.1604	-61.6653	-59.6734	-53.4249	-59.0949
792	-52.8628	-55.1702	-61.7442	-59.6504	-53.507	-59.1343
793	-52.7576	-55.1505	-61.7803	-59.7062	-53.4413	-59.0817
794	-52.8628	-55.1078	-61.754	-59.6832	-53.4479	-59.0554
795	-52.8168	-55.1176	-61.6981	-59.6471	-53.4577	-59.0028
796	-52.7346	-55.1341	-61.7409	-59.7128	-53.4216	-59.0751
797	-52.6952	-55.19	-61.8033	-59.7555	-53.4314	-59.0324
798	-52.7346	-55.1604	-61.7869	-59.7654	-53.4775	-59.0784
799	-52.6524	-55.2195	-61.7244	-59.7621	-53.438	-58.9963
800	-52.6294	-55.2195	-61.7705	-59.7983	-53.4347	-58.993
801	-52.6294	-55.1965	-61.8099	-59.7555	-53.4906	-58.9404
802	-52.5045	-55.19	-61.7737	-59.7128	-53.438	-59.0521
803	-52.4651	-55.1768	-61.7639	-59.8016	-53.4972	-58.9831
804	-52.4684	-55.0716	-61.6883	-59.7292	-53.4775	-58.9535
805	-52.3204	-55.1176	-61.7869	-59.7917	-53.4512	-58.9601
806	-52.3697	-55.1637	-61.708	-59.8279	-53.5432	-58.9371
807	-52.4486	-55.1275	-61.6718	-59.795	-53.5268	-58.9765
808	-52.281	-55.1078	-61.5897	-59.795	-53.53	-58.97
809	-52.2021	-55.1669	-61.6193	-59.6997	-53.438	-58.9568
810	-52.2416	-55.0815	-61.5699	-59.7457	-53.4544	-58.993
811	-52.2383	-55.0749	-61.4878	-59.6471	-53.4939	-59.1113
812	-52.258	-55.0815	-61.6094	-59.7194	-53.5136	-59.1113
813	-52.3237	-55.0026	-61.6488	-59.5912	-53.5859	-59.0718
814	-52.258	-55.0092	-61.7047	-59.6274	-53.461	-59.1047
815	-52.3303	-55.1012	-61.639	-59.5912	-53.53	-59.0718
816	-52.3467	-55.0289	-61.6554	-59.5189	-53.5629	-59.0949
817	-52.2843	-55.0322	-61.6488	-59.5156	-53.5037	-59.131
818	-52.4092	-55.0256	-61.6653	-59.5517	-53.5432	-59.1507
819	-52.3796	-55.0322	-61.639	-59.5813	-53.507	-59.1803
820	-52.3172	-55.0453	-61.5699	-59.5879	-53.6089	-59.1606
821	-52.3928	-55.042	-61.5437	-59.5912	-53.6418	-59.2428
822	-52.3434	-55.0355	-61.5305	-59.5945	-53.6648	-59.2198
823	-52.3632	-55.1012	-61.5831	-59.5649	-53.6024	-59.1935
824	-52.281	-55.0815	-61.5305	-59.555	-53.5695	-59.2691
825	-52.3106	-55.1242	-61.5371	-59.5189	-53.6681	-59.1935
826	-52.1298	-55.1439	-61.5206	-59.5649	-53.5563	-59.2132
827	-52.235	-55.1439	-61.5404	-59.5879	-53.5563	-59.2724
828	-52.1429	-55.1867	-61.5108	-59.6339	-53.5563	-59.2756
829	-52.1331	-55.1637	-61.5338	-59.5222	-53.4577	-59.3085
830	-52.1265	-55.213	-61.5108	-59.5222	-53.5366	-59.3644
831	-52.1265	-55.213	-61.5634	-59.4696	-53.415	-59.3973
832	-52.0509	-55.2163	-61.4385	-59.4499	-53.4807	-59.3348
833	-52.0706	-55.1965	-61.4845	-59.44	-53.5103	-59.3677
834	-52.0279	-55.259	-61.4615	-59.3545	-53.5761	-59.3282
835	-52.0279	-55.1867	-61.445	-59.2362	-53.5432	-59.3907
836	-51.9424	-55.2491	-61.4648	-59.2756	-53.5728	-59.3775
837	-51.9852	-55.2754	-61.4845	-59.2395	-53.5629	-59.4334
838	-51.926	-55.3444	-61.5667	-59.2165	-53.5596	-59.394
839	-51.9096	-55.3313	-61.5075	-59.1968	-53.5695	-59.4301
840	-51.7978	-55.2754	-61.5239	-59.1507	-53.5563	-59.4696
841	-51.7387	-55.328	-61.5667	-59.1606	-53.5136	-59.4959
842	-51.5907	-55.3017	-61.422	-59.1672	-53.4906	-59.4959
843	-51.1404	-55.3642	-61.4911	-59.2559	-53.4577	-59.4696
844	-50.5882	-55.2688	-61.5338	-59.3611	-53.5202	-59.4893
845	-50.0196	-55.2623	-61.5108	-59.2395	-53.4512	-59.4729
846	-49.4312	-55.213	-61.5897	-59.2066	-53.4216	-59.4433
847	-49.0532	-55.2656	-61.4845	-59.2132	-53.4742	-59.4466
848	-48.6555	-55.1998	-61.4385	-59.1705	-53.4051	-59.4531
849	-48.5174	-55.282	-61.4681	-59.1738	-53.3986	-59.5189
850	-48.5602	-55.1637	-61.4056	-59.1507	-53.4249	-59.5222
851	-48.6456	-55.1965	-61.2511	-59.1474	-53.3394	-59.5419
852	-48.8987	-55.2853	-61.3629	-59.1277	-53.4117	-59.6109
853	-49.1354	-55.2163	-61.3168	-59.0751	-53.3854	-59.5715
854	-49.3129	-55.1932	-61.3234	-59.0456	-53.3821	-59.6142
855	-49.5364	-55.1275	-61.3596	-59.108	-53.3262	-59.6208
856	-49.6153	-55.2524	-61.4582	-59.1244	-53.3526	-59.6339
857	-49.8487	-55.2623	-61.4648	-59.1474	-53.3493	-59.6175
858	-50.0262	-55.2491	-61.4352	-59.1803	-53.3328	-59.6175
859	-50.1445	-55.2195	-61.4713	-59.2494	-53.3328	-59.6405
860	-50.2858	-55.2688	-61.3826	-59.2789	-53.3295	-59.6832
861	-50.437	-55.2656	-61.4615	-59.3118	-53.3328	-59.6701
862	-50.5389	-55.4003	-61.4352	-59.2888	-53.3986	-59.6964
863	-50.7164	-55.2754	-61.4056	-59.4071	-53.3591	-59.7523
864	-50.8282	-55.3675	-61.4056	-59.3841	-53.3756	-59.6964
865	-50.9235	-55.4102	-61.5108	-59.4236	-53.3493	-59.6142
866	-51.0648	-55.3576	-61.4155	-59.325	-53.3427	-59.6997
867	-51.078	-55.4595	-61.3497	-59.4005	-53.4479	-59.6471
868	-51.2325	-55.4858	-61.3136	-59.2954	-53.3624	-59.6504
869	-51.3212	-55.5219	-61.3497	-59.3118	-53.369	-59.7292
870	-51.4428	-55.4463	-61.3497	-59.2822	-53.3887	-59.7194
871	-51.5644	-55.4759	-61.3563	-59.325	-53.3361	-59.6799
872	-51.6072	-55.5088	-61.2938	-59.3184	-53.3032	-59.6043
873	-51.6006	-55.5088	-61.2478	-59.3973	-53.3394	-59.6504
874	-51.6565	-55.4858	-61.2643	-59.4005	-53.3558	-59.5978
875	-51.7452	-55.4989	-61.2347	-59.3907	-53.392	-59.5978
876	-51.8011	-55.5581	-61.2906	-59.3348	-53.3953	-59.5813
877	-51.8307	-55.5449	-61.1985	-59.2263	-53.369	-59.6339
878	-51.8997	-55.5515	-61.2051	-59.2921	-53.2506	-59.6011
879	-52.0049	-55.4891	-61.1065	-59.2461	-53.3756	-59.6931
880	-51.8767	-55.4858	-61.1459	-59.2132	-53.2967	-59.703
881	-51.9852	-55.5088	-61.1591	-59.1902	-53.3164	-59.6668
882	-52.0871	-55.5679	-61.1952	-59.1409	-53.3526	-59.6964
883	-52.0969	-55.5515	-61.1788	-59.2263	-53.2276	-59.795
884	-52.1594	-55.5712	-61.0868	-59.2559	-53.2474	-59.7161
885	-52.1627	-55.4924	-61.0375	-59.3315	-53.1685	-59.7523
886	-52.2514	-55.4726	-61.044	-59.2428	-53.2474	-59.7358
887	-52.3434	-55.4398	-61.0407	-59.2526	-53.1981	-59.795
888	-52.396	-55.4891	-61.0506	-59.2263	-53.2342	-59.8279
889	-52.5078	-55.4693	-60.9684	-59.2756	-53.2408	-59.8673
890	-52.567	-55.3773	-60.9619	-59.3217	-53.2244	-59.772
891	-52.6163	-55.5088	-60.9816	-59.4038	-53.2441	-59.7621
892	-52.6196	-55.3806	-60.8337	-59.486	-53.1981	-59.772
893	-52.7017	-55.4858	-60.8041	-59.5485	-53.1816	-59.7555
894	-52.7839	-55.4956	-60.7942	-59.5123	-53.2408	-59.8081
895	-52.8003	-55.5187	-60.7022	-59.555	-53.1849	-59.795
896	-52.8595	-55.5647	-60.5083	-59.5649	-53.2572	-59.8016
897	-52.945	-55.5581	-60.482	-59.5945	-53.2506	-59.841
898	-52.9811	-55.5679	-60.3603	-59.5485	-53.2309	-59.8377
899	-52.9778	-55.5975	-60.2552	-59.4762	-53.1816	-59.8016
900	-53.0929	-55.6337	-60.1796	-59.4433	-53.2079	-59.7457
901	-53.2112	-55.6468	-60.1533	-59.3743	-53.2276	-59.8377
902	-53.3032	-55.7093	-60.1138	-59.3578	-53.175	-59.841
903	-53.3328	-55.614	-60.0875	-59.2987	-53.3032	-59.8969
904	-53.3394	-55.6304	-59.956	-59.3052	-53.3164	-59.8969
905	-53.4084	-55.6764	-59.9856	-59.3841	-53.2342	-59.9067
906	-53.3558	-55.7126	-59.9429	-59.3151	-53.3197	-60.0119
907	-53.4314	-55.6929	-59.841	-59.371	-53.3361	-59.9988
908	-53.5859	-55.7126	-59.8344	-59.4564	-53.3887	-60.0448
909	-53.6944	-55.729	-59.7128	-59.4729	-53.3657	-59.9791
910	-53.6582	-55.7126	-59.6438	-59.4301	-53.3854	-59.9823
911	-53.7831	-55.6731	-59.6306	-59.4992	-53.4249	-60.081
912	-53.7536	-55.7027	-59.5419	-59.4696	-53.4413	-60.0711
913	-53.862	-55.7323	-59.4531	-59.4104	-53.369	-60.1533
914	-53.9343	-55.683	-59.325	-59.3907	-53.3854	-60.1105
915	-54.0691	-55.8145	-59.3447	-59.3512	-53.5235	-60.1763
916	-54.1513	-55.8605	-59.3414	-59.3743	-53.4413	-60.1598
917	-54.1348	-55.8802	-59.4104	-59.3775	-53.4676	-60.0941
918	-54.1973	-55.9131	-59.5287	-59.4597	-53.4643	-60.1138
919	-54.2433	-55.8934	-59.5057	-59.4959	-53.3953	-60.1171
920	-54.3353	-55.9131	-59.5419	-59.5353	-53.3164	-60.2617
921	-54.4077	-55.8309	-59.5715	-59.4531	-53.392	-60.2387
922	-54.4997	-55.8605	-59.6175	-59.4827	-53.369	-60.2387
923	-54.5096	-55.9197	-59.6569	-59.5485	-53.3821	-60.1993
924	-54.5983	-55.9624	-59.6274	-59.4794	-53.346	-60.242
925	-54.5654	-56.0084	-59.7753	-59.5945	-53.3394	-60.2387
926	-54.5556	-55.9887	-59.7457	-59.7424	-53.2868	-60.2716
927	-54.6312	-55.9624	-59.841	-59.7424	-53.3164	-60.2749
928	-54.6805	-56.0117	-59.7983	-59.795	-53.3164	-60.2519
929	-54.6476	-56.038	-59.8476	-59.7325	-53.3164	-60.2716
930	-54.6476	-56.0183	-59.8903	-59.7917	-53.3854	-60.2946
931	-54.7429	-56.084	-59.8739	-59.8048	-53.3624	-60.3472
932	-54.835	-56.1432	-59.956	-59.841	-53.3295	-60.2815
933	-54.835	-56.0544	-60.0284	-59.8147	-53.3723	-60.288
934	-54.8021	-56.1892	-59.9955	-59.8739	-53.3526	-60.2256
935	-54.835	-56.2089	-59.9955	-59.8443	-53.2901	-60.2223
936	-54.8284	-56.1596	-59.9626	-59.7818	-53.3394	-60.2354
937	-54.9467	-56.1596	-60.0021	-59.8903	-53.3328	-60.2584
938	-54.9533	-56.1234	-60.0054	-59.9462	-53.323	-60.2453
939	-54.9993	-56.1103	-60.081	-59.9692	-53.3854	-60.3603
940	-55.0453	-56.1826	-60.1138	-60.0152	-53.4084	-60.3078
941	-55.1012	-56.1892	-60.0579	-60.0678	-53.4117	-60.2946
942	-55.1867	-56.2779	-60.1105	-60.0086	-53.4709	-60.2749
943	-55.2393	-56.2648	-60.2256	-59.9232	-53.4413	-60.3538
944	-55.2524	-56.2549	-60.1828	-59.9791	-53.507	-60.2979
945	-55.2623	-56.2615	-60.219	-59.9922	-53.461	-60.3176
946	-55.3642	-56.2911	-60.2289	-59.9396	-53.5202	-60.2913
947	-55.4266	-56.2746	-60.0941	-59.9166	-53.4873	-60.3603
948	-55.5943	-56.2484	-60.173	-59.9692	-53.5596	-60.3603
949	-55.614	-56.2911	-60.2026	-59.9823	-53.5235	-60.4129
950	-55.683	-56.3864	-60.1796	-59.9363	-53.5465	-60.3538
951	-55.6797	-56.3272	-60.1237	-59.9856	-53.5662	-60.4359
952	-55.6994	-56.3272	-60.1927	-59.8706	-53.5498	-60.4622
953	-55.7586	-56.3272	-60.2486	-59.8804	-53.5136	-60.4655
954	-55.7257	-56.3897	-60.2026	-59.887	-53.4544	-60.3702
955	-55.798	-56.2944	-60.1927	-59.8213	-53.5465	-60.4524
956	-55.8145	-56.4061	-60.1204	-59.8344	-53.4479	-60.482
957	-55.7192	-56.4291	-60.1598	-59.7654	-53.5037	-60.4721
958	-55.6731	-56.4258	-60.288	-59.7588	-53.507	-60.3965
959	-55.6173	-56.4324	-60.2782	-59.7983	-53.5596	-60.3866
960	-55.5844	-56.3535	-60.3176	-59.7753	-53.4709	-60.4228
961	-55.6074	-56.3733	-60.2847	-59.7983	-53.5432	-60.4557
962	-55.5351	-56.3897	-60.242	-59.7621	-53.5235	-60.3735
963	-55.5515	-56.5047	-60.334	-59.6865	-53.5465	-60.4688
964	-55.5581	-56.4883	-60.2979	-59.7588	-53.5103	-60.4458
965	-55.5614	-56.5803	-60.3406	-59.749	-53.6648	-60.4359
966	-55.4759	-56.5836	-60.3472	-59.6339	-53.6286	-60.4359
967	-55.3872	-56.6296	-60.2946	-59.6372	-53.6747	-60.4294
968	-55.42	-56.6757	-60.2946	-59.5517	-53.6812	-60.4327
969	-55.4529	-56.6428	-60.311	-59.5517	-53.7831	-60.4096
970	-55.4956	-56.6592	-60.3275	-59.4992	-53.7799	-60.3932
971	-55.374	-56.6132	-60.4064	-59.5353	-53.8029	-60.3571
972	-55.3872	-56.6559	-60.3669	-59.4564	-53.793	-60.3538
973	-55.4661	-56.6822	-60.3275	-59.5287	-53.8127	-60.3373
974	-55.4759	-56.7118	-60.3603	-59.4827	-53.8226	-60.2913
975	-55.4398	-56.7151	-60.2979	-59.4137	-53.816	-60.219
976	-55.4365	-56.817	-60.288	-59.3348	-53.7996	-60.1828
977	-55.4891	-56.7184	-60.2256	-59.4236	-53.9508	-60.2322
978	-55.5745	-56.8039	-60.0974	-59.2428	-53.9902	-60.242
979	-55.5187	-56.8334	-60.104	-59.2691	-53.9179	-60.1072
980	-55.5022	-56.7052	-60.0514	-59.3414	-53.9212	-60.15
981	-55.4661	-56.8039	-60.0218	-59.3052	-54.0132	-60.0645
982	-55.4233	-56.9025	-60.0481	-59.3348	-54.0297	-59.9889
983	-55.3707	-56.8499	-59.9725	-59.3512	-54.0329	-59.9166
984	-55.351	-56.84	-59.9396	-59.3973	-54.0855	-59.8377
985	-55.4595	-56.8729	-59.9067	-59.44	-54.0461	-59.8311
986	-55.4595	-56.8334	-59.8673	-59.4433	-54.0132	-59.6767
987	-55.5219	-56.8663	-59.8048	-59.4926	-54.0034	-59.5978
988	-55.4595	-56.9057	-59.703	-59.5254	-54.0527	-59.5649
989	-55.4956	-56.9452	-59.6175	-59.4663	-54.125	-59.5715
990	-55.4135	-56.8663	-59.5748	-59.4729	-54.1283	-59.5353
991	-55.3872	-56.8762	-59.6142	-59.486	-54.1184	-59.486
992	-55.4529	-56.886	-59.4992	-59.5254	-54.1316	-59.463
993	-55.5219	-56.9386	-59.4531	-59.5748	-54.1644	-59.3545
994	-55.4825	-56.9583	-59.3907	-59.5813	-54.1611	-59.3447
995	-55.5515	-56.9189	-59.3677	-59.5879	-54.1513	-59.2296
996	-55.6041	-56.909	-59.4696	-59.5945	-54.1841	-59.2395
997	-55.5975	-56.9057	-59.4564	-59.5287	-54.2302	-59.1803
998	-55.6008	-56.932	-59.4236	-59.4367	-54.2072	-59.2263
999	-55.66	-56.8466	-59.4334	-59.371	-54.3156	-59.1968
1000	-55.5647	-56.9715	-59.417	-59.394	-54.2565	-59.2066
1001	-55.5679	-56.8959	-59.3973	-59.3578	-54.3419	-59.1277
1002	-55.5877	-56.9781	-59.3611	-59.3644	-54.3584	-59.1606
1003	-55.6074	-56.9518	-59.4005	-59.3315	-54.4011	-59.1474
1004	-55.6008	-56.9781	-59.3775	-59.2395	-54.4142	-59.1244
1005	-55.5219	-56.9452	-59.2954	-59.1902	-54.4504	-59.0817
1006	-55.5121	-56.9978	-59.3512	-59.177	-54.4405	-59.108
1007	-55.4003	-57.0274	-59.3052	-59.2658	-54.5128	-59.0653
1008	-55.42	-57.0011	-59.2494	-59.2592	-54.4274	-59.0094
1009	-55.5022	-56.9748	-59.3644	-59.3973	-54.4635	-59.0094
1010	-55.5022	-57.0307	-59.3611	-59.4597	-54.6082	-58.9897
1011	-55.4496	-56.9189	-59.3118	-59.4564	-54.503	-58.9634
1012	-55.3937	-56.932	-59.2756	-59.4794	-54.5194	-58.9207
1013	-55.4825	-56.9485	-59.2592	-59.5123	-54.5063	-58.9469
1014	-55.4529	-56.9748	-59.2625	-59.4794	-54.5128	-58.8385
1015	-55.4036	-57.0175	-59.2198	-59.417	-54.5063	-58.8582
1016	-55.397	-57.0537	-59.1474	-59.5386	-54.5063	-58.8714
1017	-55.3872	-57.0175	-59.1639	-59.5419	-54.4833	-58.7727
1018	-55.3707	-57.0175	-59.1277	-59.5517	-54.4635	-58.7793
1019	-55.3707	-57.0372	-59.1738	-59.6076	-54.4734	-58.7464
1020	-55.3937	-57.0734	-59.1212	-59.6339	-54.4504	-58.7629
1021	-55.3181	-57.0865	-59.154	-59.6964	-54.503	-58.6807
1022	-55.3017	-57.0701	-59.1146	-59.7227	-54.3978	-58.7103
1023	-55.259	-57.0372	-59.1705	-59.7391	-54.4307	-58.7004
1024	-55.1472	-56.9715	-59.154	-59.7687	-54.3847	-58.5985
1025	-55.2327	-57.0635	-59.1146	-59.7851	-54.3781	-58.6906
1026	-55.2228	-57.0964	-59.108	-59.7785	-54.3781	-58.6051
1027	-55.2721	-57.0734	-59.1146	-59.8377	-54.3485	-58.5952
1028	-55.3149	-57.0701	-59.1507	-59.8377	-54.3255	-58.5459
1029	-55.3707	-56.9945	-59.0521	-59.795	-54.2762	-58.5361
1030	-55.3214	-57.0865	-58.9831	-59.8344	-54.2499	-58.444
1031	-55.3543	-57.1654	-58.8944	-59.7983	-54.3156	-58.4703
1032	-55.374	-57.1095	-58.9634	-59.8476	-54.2367	-58.4177
1033	-55.3477	-57.1063	-58.9009	-59.8837	-54.217	-58.4703
1034	-55.3149	-57.0931	-58.9042	-59.9692	-54.2828	-58.4934
1035	-55.3346	-57.0767	-58.9141	-59.9232	-54.2269	-58.4934
1036	-55.4036	-57.1293	-58.8714	-60.0218	-54.2104	-58.5196
1037	-55.4628	-57.0997	-58.8845	-60.1138	-54.1841	-58.4736
1038	-55.4891	-57.1786	-58.7662	-60.0448	-54.2203	-58.4934
1039	-55.5482	-57.149	-58.7103	-60.0612	-54.2499	-58.5032
1040	-55.5318	-57.1753	-58.5624	-60.1007	-54.2663	-58.4868
1041	-55.6041	-57.1556	-58.4901	-60.081	-54.1841	-58.5328
1042	-55.5482	-57.1917	-58.3947	-60.1072	-54.286	-58.569
1043	-55.5679	-57.2049	-58.5459	-60.1697	-54.2532	-58.4769
1044	-55.6797	-57.1588	-58.5361	-60.1007	-54.2565	-58.5131
1045	-55.6271	-57.1687	-58.5492	-60.1927	-54.2959	-58.5427
1046	-55.6238	-57.2607	-58.5229	-60.1237	-54.2597	-58.5262
1047	-55.6666	-57.3035	-58.5361	-60.2584	-54.2597	-58.5328
1048	-55.6468	-57.264	-58.5032	-60.3472	-54.2795	-58.5657
1049	-55.6896	-57.3265	-58.4671	-60.3308	-54.2565	-58.592
1050	-55.6436	-57.3133	-58.4671	-60.2519	-54.2729	-58.5427
1051	-55.66	-57.3331	-58.3914	-60.2584	-54.3781	-58.5525
1052	-55.6436	-57.31	-58.421	-60.2749	-54.2565	-58.5558
1053	-55.6896	-57.3462	-58.4309	-60.2354	-54.3616	-58.5755
1054	-55.6041	-57.4218	-58.3619	-60.2256	-54.3682	-58.6018
1055	-55.614	-57.3495	-58.352	-60.3472	-54.3123	-58.5755
1056	-55.637	-57.3856	-58.3027	-60.4228	-54.2729	-58.615
1057	-55.7192	-57.3856	-58.2567	-60.6069	-54.24	-58.5854
1058	-55.7224	-57.3758	-58.2403	-60.5181	-54.286	-58.4966
1059	-55.5647	-57.4119	-58.1745	-60.5214	-54.1414	-58.6314
1060	-55.5712	-57.4448	-58.1482	-60.6266	-54.2367	-58.5262
1061	-55.5581	-57.4382	-58.0595	-60.712	-54.2302	-58.5821
1062	-55.5844	-57.3856	-58.0365	-60.7285	-54.2039	-58.5492
1063	-55.6501	-57.4152	-57.9806	-60.7844	-54.1907	-58.5854
1064	-55.6271	-57.3166	-57.836	-60.7712	-54.2466	-58.5722
1065	-55.5219	-57.4185	-57.8787	-60.86	-54.2269	-58.5788
1066	-55.4989	-57.4415	-57.8885	-60.8698	-54.2893	-58.5229
1067	-55.5384	-57.4349	-57.9116	-60.8665	-54.1874	-58.661
1068	-55.5055	-57.4678	-57.9148	-60.8994	-54.2137	-58.6643
1069	-55.4858	-57.4645	-57.8918	-60.906	-54.2663	-58.8878
1070	-55.4266	-57.5664	-57.8425	-60.9586	-54.2532	-58.7793
1071	-55.4792	-57.5336	-57.8853	-60.9454	-54.2795	-58.8089
1072	-55.4398	-57.4842	-57.8097	-60.9684	-54.2663	-58.8615
1073	-55.4168	-57.5171	-57.7735	-61.0079	-54.3616	-58.8023
1074	-55.3707	-57.4317	-57.7834	-60.9914	-54.2893	-58.7793
1075	-55.3412	-57.5631	-57.7669	-60.9684	-54.2433	-58.8056
1076	-55.2557	-57.5073	-57.8064	-60.975	-54.2532	-58.7859
1077	-55.2787	-57.5336	-57.7801	-60.9191	-54.2959	-58.8089
1078	-55.2754	-57.5861	-57.7965	-60.9224	-54.2729	-58.8681
1079	-55.2557	-57.55	-57.7669	-60.883	-54.3156	-58.8352
1080	-55.3444	-57.5237	-57.6946	-60.9323	-54.3912	-58.799
1081	-55.374	-57.6585	-57.7702	-60.9586	-54.3255	-58.73
1082	-55.305	-57.6223	-57.7801	-60.9356	-54.2828	-58.6018
1083	-55.305	-57.7275	-57.688	-60.9487	-54.3518	-58.5591
1084	-55.3149	-57.6354	-57.6617	-60.9421	-54.309	-58.569
1085	-55.3839	-57.7275	-57.573	-60.998	-54.3222	-58.4572
1086	-55.42	-57.7505	-57.6091	-61.0572	-54.3321	-58.3882
1087	-55.397	-57.7834	-57.6157	-61.1032	-54.3123	-58.329
1088	-55.4792	-57.7538	-57.5368	-61.1295	-54.3978	-58.2468
1089	-55.5154	-57.7604	-57.527	-61.0572	-54.3945	-58.214
1090	-55.4661	-57.7899	-57.4908	-60.9947	-54.4011	-58.1088
1091	-55.5384	-57.8064	-57.4908	-61.1229	-54.4142	-57.9937
1092	-55.5449	-57.8458	-57.3593	-61.0868	-54.3847	-57.8491
1093	-55.5187	-57.8655	-57.3593	-61.0572	-54.4405	-57.7834
1094	-55.5022	-57.7932	-57.3035	-61.0605	-54.4142	-57.6946
1095	-55.5022	-57.8228	-57.3429	-61.1131	-54.4865	-57.6387
1096	-55.5614	-57.836	-57.2443	-61.1591	-54.5326	-57.6223
1097	-55.6863	-57.9214	-57.2772	-61.2182	-54.5326	-57.5664
1098	-55.5943	-57.951	-57.1424	-61.1755	-54.5819	-57.4908
1099	-55.6304	-57.9083	-57.0898	-61.1295	-54.5358	-57.4547
1100	-55.729	-57.8491	-57.0339	-61.0375	-54.595	-57.3002
1101	-55.6501	-57.8721	-57.1325	-61.0309	-54.4931	-57.2476
1102	-55.6567	-57.7702	-57.0931	-60.9717	-54.4931	-57.1063
1103	-55.6666	-57.8524	-57.0372	-60.9684	-54.618	-57.0931
1104	-55.6501	-57.9313	-57.0339	-60.9487	-54.5983	-57.0471
1105	-55.8079	-57.8524	-57.0307	-60.9586	-54.5917	-56.9222
1106	-55.7192	-57.928	-56.9945	-60.9454	-54.6838	-56.9222
1107	-55.8013	-57.9017	-56.9912	-60.8764	-54.7265	-56.9288
1108	-55.7849	-57.8721	-56.9945	-60.8205	-54.812	-56.9452
1109	-55.7553	-57.9083	-56.9682	-60.8797	-54.7002	-56.8433
1110	-55.7487	-57.9937	-56.9912	-60.8665	-54.6772	-56.7776
1111	-55.8079	-57.9674	-57.057	-60.8468	-54.6772	-56.7743
1112	-55.7027	-57.951	-57.0274	-60.8304	-54.6509	-56.6789
1113	-55.6666	-57.951	-56.9551	-60.8107	-54.6969	-56.6822
1114	-55.7389	-57.9872	-56.9813	-60.8172	-54.6608	-56.6264
1115	-55.7816	-58.0529	-56.9715	-60.7712	-54.7364	-56.554
1116	-55.7487	-58.0562	-56.9715	-60.7055	-54.7561	-56.6132
1117	-55.8309	-58.066	-56.9879	-60.7186	-54.6969	-56.6066
1118	-55.8638	-57.9806	-56.9255	-60.712	-54.7429	-56.5179
1119	-55.8967	-57.9839	-56.9452	-60.6989	-54.7199	-56.4784
1120	-55.9098	-57.9937	-56.9945	-60.7515	-54.7627	-56.3831
1121	-55.9755	-58.0496	-57.0175	-60.8501	-54.7561	-56.5047
1122	-56.0577	-57.9609	-57.1063	-60.7745	-54.7922	-56.577
1123	-56.1136	-58.0299	-57.172	-60.7252	-54.7889	-56.5606
1124	-56.153	-58.0595	-57.2739	-60.7581	-54.8744	-56.4817
1125	-56.1136	-58.0069	-57.3232	-60.7186	-54.9007	-56.4554
1126	-56.153	-57.997	-57.3495	-60.7548	-54.927	-56.531
1127	-56.2188	-58.0134	-57.3593	-60.8632	-54.8382	-56.4653
1128	-56.2648	-57.9773	-57.3889	-60.8863	-54.8152	-56.4554
1129	-56.347	-57.9806	-57.4514	-60.9651	-54.8974	-56.4226
1130	-56.3568	-57.9806	-57.5434	-60.9421	-54.9434	-56.393
1131	-56.3272	-58.0167	-57.5138	-60.9126	-54.9204	-56.3897
1132	-56.3371	-57.9806	-57.5171	-60.9323	-54.9303	-56.3831
1133	-56.3963	-57.9839	-57.5631	-60.9947	-54.9434	-56.3437
1134	-56.462	-57.9937	-57.55	-60.9783	-54.8514	-56.2911
1135	-56.4587	-57.951	-57.6091	-60.8961	-54.8645	-56.2516
1136	-56.508	-57.882	-57.6091	-60.9553	-54.996	-56.1629
1137	-56.4784	-57.8688	-57.6322	-61.0506	-54.9237	-56.0972
1138	-56.508	-57.7341	-57.6617	-60.9619	-54.8974	-56.1037
1139	-56.4817	-57.8721	-57.642	-60.9651	-54.9697	-56.0741
1140	-56.5277	-57.8195	-57.5697	-60.8928	-54.881	-56.0544
1141	-56.508	-57.7669	-57.5861	-60.8567	-54.881	-56.0347
1142	-56.6198	-57.7176	-57.5631	-60.8698	-54.835	-56.0972
1143	-56.5935	-57.7406	-57.5664	-60.8764	-54.8645	-56.0906
1144	-56.531	-57.7669	-57.596	-60.8731	-54.927	-56.1004
1145	-56.7151	-57.7439	-57.6124	-60.7186	-54.9927	-56.0216
1146	-56.7743	-57.8097	-57.5368	-60.7646	-54.9237	-56.0248
1147	-56.7217	-57.7636	-57.4941	-60.689	-54.9401	-56.0018
1148	-56.7808	-57.7604	-57.5007	-60.6858	-54.9106	-55.9558
1149	-56.7447	-57.8031	-57.5138	-60.643	-54.9566	-55.9755
1150	-56.6888	-57.8557	-57.4612	-60.5806	-54.8382	-56.0314
1151	-56.6264	-57.7538	-57.5303	-60.6299	-54.8547	-55.9722
1152	-56.7184	-57.7899	-57.4842	-60.5411	-54.9073	-55.9164
1153	-56.6362	-57.7801	-57.5697	-60.597	-54.881	-55.9427
1154	-56.6296	-57.7505	-57.5533	-60.7186	-54.8284	-55.9164
1155	-56.6066	-57.8327	-57.527	-60.7055	-54.7889	-55.9164
1156	-56.7348	-57.8557	-57.4349	-60.7252	-54.7495	-55.9361
1157	-56.7282	-57.8458	-57.3988	-60.689	-54.8448	-55.923
1158	-56.702	-57.7669	-57.3824	-60.689	-54.8021	-55.9427
1159	-56.7973	-57.7669	-57.4185	-60.6627	-54.7331	-55.9427
1160	-56.8827	-57.8557	-57.4711	-60.712	-54.7659	-55.8605
1161	-56.8104	-57.882	-57.4218	-60.6923	-54.8317	-55.8243
1162	-56.8827	-57.9444	-57.3955	-60.6858	-54.7396	-55.8572
1163	-56.8893	-57.9674	-57.3758	-60.6102	-54.7659	-55.8835
1164	-56.8959	-57.951	-57.3363	-60.5608	-54.7955	-55.8671
1165	-56.8762	-57.9214	-57.4119	-60.5214	-54.8021	-55.8276
1166	-56.9715	-57.928	-57.4185	-60.4984	-54.7955	-55.8539
1167	-57.0175	-58.0167	-57.3462	-60.4129	-54.835	-55.7948
1168	-56.9649	-57.9247	-57.3068	-60.5181	-54.8382	-55.7915
1169	-57.0274	-57.8392	-57.3232	-60.4327	-54.8876	-55.8572
1170	-57.0635	-57.8097	-57.3199	-60.4622	-54.7955	-55.8441
1171	-57.103	-57.8425	-57.2936	-60.4688	-54.904	-55.7915
1172	-57.1983	-57.7768	-57.3199	-60.4294	-54.9369	-55.7783
1173	-57.1786	-57.7768	-57.3298	-60.3866	-54.8941	-55.7685
1174	-57.1588	-57.8097	-57.2805	-60.2453	-54.9369	-55.8046
1175	-57.1194	-57.7209	-57.3429	-60.2486	-54.8514	-55.7027
1176	-57.1654	-57.7538	-57.3068	-60.242	-54.641	-55.7685
1177	-57.1063	-57.6848	-57.3856	-60.2387	-54.6739	-55.7619
1178	-57.1588	-57.6387	-57.4284	-60.2354	-54.7101	-55.7619
1179	-57.195	-57.665	-57.3298	-60.2354	-54.6509	-55.7487
1180	-57.2574	-57.7373	-57.3363	-60.2453	-54.6936	-55.6929
1181	-57.3035	-57.6223	-57.3133	-60.15	-54.7133	-55.7849
1182	-57.2147	-57.6815	-57.3988	-60.2519	-54.6936	-55.7224
1183	-57.2279	-57.711	-57.4481	-60.1171	-54.7429	-55.8375
1184	-57.2246	-57.6387	-57.4087	-60.0842	-54.7462	-55.8079
1185	-57.2016	-57.6387	-57.4547	-60.0645	-54.7364	-55.8408
1186	-57.1621	-57.6519	-57.5237	-60.1072	-54.7035	-55.8506
1187	-57.1227	-57.7275	-57.5303	-60.0316	-54.6772	-55.8408
1188	-57.1194	-57.7275	-57.5303	-60.1105	-54.7364	-55.7816
1189	-57.0734	-57.6289	-57.573	-60.127	-54.6706	-55.8145
1190	-57.0635	-57.7669	-57.4908	-60.104	-54.6969	-55.798
1191	-57.0997	-57.7505	-57.504	-60.104	-54.641	-55.7915
1192	-57.0307	-57.6913	-57.5566	-60.1566	-54.6082	-55.8769
1193	-56.9616	-57.813	-57.4941	-60.2059	-54.6476	-55.7619
1194	-57.0043	-57.7406	-57.6091	-60.1105	-54.7002	-55.8473
1195	-56.8696	-57.7308	-57.6354	-60.1566	-54.7199	-55.8309
1196	-56.8433	-57.7242	-57.6913	-60.1861	-54.6838	-55.8605
1197	-56.7414	-57.6979	-57.6322	-60.1303	-54.7068	-55.9657
1198	-56.7414	-57.6913	-57.6716	-60.1533	-54.6476	-56.0216
1199	-56.7644	-57.6913	-57.7406	-60.0382	-54.7298	-56.0709
1200	-56.7151	-57.6519	-57.7176	-59.9922	-54.6805	-56.1267
1201	-56.8301	-57.6617	-57.7636	-59.8837	-54.6673	-56.061
1202	-56.748	-57.6979	-57.7834	-59.8739	-54.6575	-56.084
1203	-56.6658	-57.6322	-57.813	-59.8279	-54.7199	-56.0281
1204	-56.6789	-57.6453	-57.8097	-59.8147	-54.7166	-56.0906
1205	-56.6789	-57.6453	-57.813	-59.7194	-54.7824	-56.0709
1206	-56.6691	-57.6848	-57.8327	-59.6964	-54.7035	-56.0544
1207	-56.5902	-57.7045	-57.7998	-59.7621	-54.7725	-56.0413
1208	-56.6132	-57.7045	-57.8655	-59.7325	-54.7331	-56.0216
1209	-56.5672	-57.7308	-57.8688	-59.7555	-54.7824	-55.9591
1210	-56.5902	-57.7636	-57.8918	-59.7095	-54.6903	-56.0577
1211	-56.554	-57.688	-57.8392	-59.6668	-54.7561	-55.9953
1212	-56.5738	-57.7932	-57.7143	-59.7227	-54.7429	-56.0248
1213	-56.5935	-57.7242	-57.8097	-59.7588	-54.7364	-56.0446
1214	-56.577	-57.6322	-57.8458	-59.7687	-54.6969	-56.1366
1215	-56.5738	-57.6585	-57.8622	-59.7753	-54.7791	-56.0511
1216	-56.5343	-57.6322	-57.8557	-59.7785	-54.7955	-56.1826
1217	-56.5442	-57.5303	-57.905	-59.9462	-54.7364	-56.1629
1218	-56.4719	-57.4842	-57.813	-59.91	-54.812	-56.2122
1219	-56.4817	-57.4908	-57.8425	-59.9692	-54.7824	-56.2122
1220	-56.4291	-57.4908	-57.8425	-59.9462	-54.904	-56.2484
1221	-56.3996	-57.4547	-57.8984	-60.0678	-54.8415	-56.2319
1222	-56.3798	-57.4284	-57.8984	-60.1105	-54.8382	-56.1925
1223	-56.324	-57.4481	-57.8524	-60.1171	-54.8613	-56.3141
1224	-56.3305	-57.3199	-57.8655	-60.3078	-54.858	-56.3798
1225	-56.347	-57.2706	-57.836	-60.3702	-54.8152	-56.3108
1226	-56.3568	-57.1556	-57.8622	-60.459	-54.7758	-56.3108
1227	-56.3108	-57.2049	-57.9017	-60.4359	-54.8218	-56.4357
1228	-56.2615	-57.241	-57.905	-60.4951	-54.881	-56.439
1229	-56.324	-57.0964	-57.974	-60.4984	-54.8613	-56.4258
1230	-56.3568	-57.1293	-57.928	-60.4064	-54.8645	-56.4521
1231	-56.3601	-57.0865	-58.0397	-60.4425	-54.9993	-56.4193
1232	-56.3535	-57.0865	-58.0036	-60.4425	-54.9533	-56.4489
1233	-56.3733	-57.0405	-57.9641	-60.4491	-54.8908	-56.4784
1234	-56.37	-57.1063	-58.0923	-60.3768	-54.9533	-56.4916
1235	-56.347	-57.0339	-58.1153	-60.3636	-54.9862	-56.4982
1236	-56.3733	-57.0372	-58.066	-60.3866	-55.0157	-56.4883
1237	-56.393	-56.9616	-58.0266	-60.4425	-54.9829	-56.5409
1238	-56.37	-56.9846	-58.0233	-60.482	-54.9467	-56.6132
1239	-56.3338	-56.9156	-58.1022	-60.3012	-55.0881	-56.5573
1240	-56.3404	-56.8762	-58.1942	-60.3176	-55.0881	-56.6165
1241	-56.347	-56.9288	-58.1614	-60.4524	-55.1702	-56.6165
1242	-56.2484	-56.9025	-58.2008	-60.3571	-55.1144	-56.5738
1243	-56.2944	-56.9123	-58.2172	-60.3242	-55.1275	-56.6559
1244	-56.37	-56.8104	-58.2797	-60.3669	-55.1834	-56.6099
1245	-56.2385	-56.8663	-58.2304	-60.3505	-55.1275	-56.6724
1246	-56.2549	-56.8269	-58.2468	-60.3275	-55.2031	-56.7677
1247	-56.2023	-56.7743	-58.2271	-60.3373	-55.1965	-56.8137
1248	-56.3174	-56.863	-58.2994	-60.2782	-55.19	-56.7907
1249	-56.324	-56.8367	-58.3126	-60.311	-55.213	-56.84
1250	-56.3207	-56.7841	-58.3783	-60.2913	-55.2393	-56.794
1251	-56.3765	-56.8236	-58.3487	-60.2782	-55.259	-56.8071
1252	-56.3798	-56.7578	-58.2665	-60.4294	-55.2787	-56.8597
1253	-56.4094	-56.748	-58.3553	-60.4491	-55.3149	-56.8729
1254	-56.4719	-56.8071	-58.3487	-60.4261	-55.3116	-56.8597
1255	-56.4127	-56.8236	-58.3158	-60.5148	-55.374	-56.8597
1256	-56.5409	-56.8203	-58.3849	-60.4557	-55.4069	-56.8794
1257	-56.5409	-56.8367	-58.4835	-60.4195	-55.4496	-56.8433
1258	-56.6033	-56.8762	-58.4802	-60.5313	-55.397	-56.8499
1259	-56.6198	-56.8564	-58.4309	-60.4721	-55.3905	-56.7973
1260	-56.6033	-56.8269	-58.5427	-60.4721	-55.3444	-56.909
1261	-56.6033	-56.8203	-58.5887	-60.4557	-55.4595	-56.863
1262	-56.6757	-56.8992	-58.5755	-60.4195	-55.5417	-56.9222
1263	-56.6132	-56.8992	-58.615	-60.4162	-55.5252	-56.932
1264	-56.6198	-56.8926	-58.684	-60.3571	-55.6173	-57.0043
1265	-56.7447	-56.8532	-58.7399	-60.4294	-55.5581	-56.9748
1266	-56.7315	-56.9156	-58.8253	-60.4524	-55.5351	-56.9912
1267	-56.8071	-56.9485	-58.8418	-60.3603	-55.4693	-57.0964
1268	-56.6888	-56.9025	-58.8483	-60.3439	-55.4989	-57.0668
1269	-56.6954	-56.8597	-58.8878	-60.3636	-55.6008	-57.149
1270	-56.6198	-56.8696	-58.9371	-60.3143	-55.6666	-57.2049
1271	-56.7151	-56.817	-58.9798	-60.3571	-55.6896	-57.1753
1272	-56.7085	-56.8663	-59.0258	-60.3176	-55.6929	-57.2312
1273	-56.7282	-56.7611	-59.0488	-60.311	-55.7849	-57.2706
1274	-56.6954	-56.7677	-59.0817	-60.2913	-55.7356	-57.2509
1275	-56.7348	-56.8006	-59.1474	-60.2913	-55.8046	-57.2476
1276	-56.6428	-56.7578	-59.1277	-60.2552	-55.8079	-57.2805
1277	-56.6264	-56.6527	-59.1803	-60.2486	-55.8013	-57.3002
1278	-56.7545	-56.6428	-59.1705	-60.2979	-55.8408	-57.3265
1279	-56.6855	-56.6461	-59.2526	-60.3702	-55.8572	-57.3068
1280	-56.6888	-56.6296	-59.2822	-60.3308	-55.8342	-57.3528
1281	-56.6296	-56.554	-59.3315	-60.288	-55.8408	-57.3002
1282	-56.7118	-56.4686	-59.3414	-60.2157	-55.8704	-57.3856
1283	-56.6724	-56.4258	-59.4663	-60.2486	-55.9098	-57.3396
1284	-56.6888	-56.3634	-59.4466	-60.2256	-55.8901	-57.3791
1285	-56.6954	-56.2286	-59.532	-60.3078	-55.8934	-57.2805
1286	-56.6264	-56.176	-59.5846	-60.2716	-55.8539	-57.3593
1287	-56.7151	-56.1333	-59.6076	-60.3012	-55.8243	-57.4382
1288	-56.7447	-55.9197	-59.6832	-60.482	-55.7192	-57.3824
1289	-56.7677	-55.9427	-59.7227	-60.4064	-55.7685	-57.4448
1290	-56.7776	-55.8276	-59.6931	-60.5543	-55.6896	-57.5007
1291	-56.7282	-55.8309	-59.7292	-60.597	-55.7027	-57.4284
1292	-56.8532	-55.7619	-59.8443	-60.4754	-55.6929	-57.3758
1293	-56.7743	-55.7093	-59.91	-60.5247	-55.7126	-57.3922
1294	-56.8334	-55.6436	-59.8739	-60.5083	-55.7389	-57.4054
1295	-56.9222	-55.5187	-59.8574	-60.4129	-55.614	-57.4448
1296	-56.9452	-55.5811	-59.9035	-60.3538	-55.6205	-57.4448
1297	-56.9912	-55.4825	-59.9298	-60.3932	-55.6534	-57.4382
1298	-56.9912	-55.4365	-59.9265	-60.4918	-55.6501	-57.3725
1299	-56.9978	-55.3773	-59.9199	-60.4754	-55.7093	-57.4152
1300	-57.0405	-55.3214	-59.8837	-60.505	-55.7487	-57.4349
1301	-56.8203	-55.2228	-59.9823	-60.5378	-55.6107	-57.5237
1302	-56.9025	-55.1308	-60.0875	-60.5707	-55.6896	-57.4711
1303	-56.8466	-55.1176	-59.9528	-60.5806	-55.66	-57.5204
1304	-56.84	-55.0979	-60.0908	-60.6627	-55.6731	-57.4842
1305	-56.7743	-55.0092	-60.0349	-60.7186	-55.6797	-57.5599
1306	-56.6757	-54.8777	-60.104	-60.6858	-55.6666	-57.527
1307	-56.7315	-54.7429	-60.1204	-60.7614	-55.7323	-57.5401
1308	-56.7644	-54.6772	-60.1796	-60.7745	-55.7915	-57.6256
1309	-56.6559	-54.6509	-60.1335	-60.8074	-55.729	-57.573
1310	-56.6527	-54.5589	-60.1467	-60.8139	-55.6961	-57.688
1311	-56.6494	-54.3978	-60.2453	-60.7877	-55.7816	-57.6716
1312	-56.6231	-54.457	-60.1434	-60.7351	-55.7422	-57.688
1313	-56.6855	-54.3781	-60.2552	-60.8731	-55.8013	-57.7373
1314	-56.6066	-54.3156	-60.2157	-60.9126	-55.8243	-57.6815
1315	-56.5902	-54.2597	-60.1566	-61.044	-55.7915	-57.7636
1316	-56.5442	-54.2499	-60.2059	-61.0638	-55.8441	-57.7801
1317	-56.5606	-54.1677	-60.2124	-61.0703	-55.8079	-57.7702
1318	-56.5442	-54.0954	-60.1861	-61.021	-55.8901	-57.7702
1319	-56.4916	-54.0494	-60.2519	-61.0342	-55.9492	-57.8162
1320	-56.4784	-54.0198	-60.2913	-60.9882	-55.9854	-57.8097
1321	-56.4587	-53.9442	-60.2552	-60.975	-56.0018	-57.9576
1322	-56.531	-53.9935	-60.3505	-61.0079	-55.9558	-57.8984
1323	-56.4423	-53.8324	-60.2946	-60.975	-56.0051	-57.9839
1324	-56.4028	-53.8587	-60.3242	-60.9553	-56.0511	-57.9937
1325	-56.393	-53.862	-60.4261	-60.9323	-56.0216	-57.882
1326	-56.3634	-53.7371	-60.3735	-60.8994	-56.1004	-57.9379
1327	-56.4061	-53.7437	-60.3669	-60.8074	-56.1333	-57.9444
1328	-56.3338	-53.678	-60.3998	-60.8041	-56.1004	-58.0069
1329	-56.3963	-53.678	-60.4162	-60.6397	-56.1793	-58.0102
1330	-56.4686	-53.6451	-60.4688	-60.5839	-56.2319	-58.1252
1331	-56.5146	-53.6418	-60.4852	-60.6003	-56.2089	-58.0233
1332	-56.4587	-53.5793	-60.4195	-60.5707	-56.2714	-58.0529
1333	-56.462	-53.5399	-60.62	-60.666	-56.2779	-57.9839
1334	-56.5376	-53.5005	-60.5148	-60.62	-56.2944	-58.0628
1335	-56.5935	-53.484	-60.6365	-60.7055	-56.3437	-58.1351
1336	-56.6428	-53.415	-60.7482	-60.6069	-56.3634	-58.0562
1337	-56.702	-53.4413	-60.7318	-60.6167	-56.37	-58.0989
1338	-56.6822	-53.4709	-60.7022	-60.6134	-56.4686	-58.1679
1339	-56.7578	-53.4249	-60.7844	-60.6529	-56.4094	-58.1778
1340	-56.7315	-53.5235	-60.7712	-60.7679	-56.4489	-58.2107
1341	-56.6658	-53.392	-60.837	-60.7844	-56.4784	-58.2205
1342	-56.6362	-53.323	-60.7416	-60.7055	-56.5376	-58.2534
1343	-56.6822	-53.3953	-60.7515	-60.7515	-56.5672	-58.2994
1344	-56.7151	-53.3493	-60.7646	-60.8041	-56.6559	-58.2468
1345	-56.7315	-53.3197	-60.8074	-60.8271	-56.6428	-58.2764
1346	-56.7973	-53.3032	-60.8435	-60.7745	-56.7315	-58.2337
1347	-56.7184	-53.2046	-60.7942	-60.8567	-56.7085	-58.2271
1348	-56.7282	-53.0929	-60.7614	-60.7219	-56.8006	-58.306
1349	-56.7578	-53.0699	-60.8435	-60.7383	-56.8499	-58.3717
1350	-56.8006	-53.06	-60.8665	-60.7581	-56.9616	-58.3619
1351	-56.8334	-53.0107	-60.883	-60.8139	-56.8992	-58.3191
1352	-56.8236	-52.9811	-60.9027	-60.7877	-57.0438	-58.2304
1353	-56.7743	-52.9055	-60.9553	-60.7318	-57.08	-58.1909
1354	-56.8893	-52.9483	-60.8797	-60.8041	-57.1194	-58.1614
1355	-56.8893	-52.9515	-60.906	-60.8238	-57.1293	-58.1153
1356	-56.8762	-52.9121	-60.9619	-60.837	-57.1588	-58.1482
1357	-56.9386	-52.9055	-60.9914	-60.8008	-57.1786	-58.1285
1358	-56.9419	-52.8036	-60.8928	-60.8534	-57.1293	-58.0332
1359	-57.0109	-52.8431	-60.9684	-60.7942	-57.1325	-58.1121
1360	-57.0635	-52.8266	-60.9914	-60.8008	-57.2509	-58.066
1361	-57.0734	-52.9154	-61.0276	-60.8271	-57.2246	-58.066
1362	-57.0767	-52.774	-61.021	-60.7022	-57.195	-58.0496
1363	-57.1227	-52.8168	-61.067	-60.7219	-57.3331	-58.0397
1364	-57.0701	-52.7215	-61.1098	-60.7186	-57.3429	-58.0595
1365	-57.195	-52.6557	-61.0638	-60.7153	-57.2509	-57.9806
1366	-57.1556	-52.7149	-61.044	-60.6233	-57.264	-58.0562
1367	-57.2016	-52.6459	-61.1295	-60.7055	-57.3889	-58.0167
1368	-57.1621	-52.6097	-61.1328	-60.5773	-57.3593	-57.951
1369	-57.3298	-52.5801	-61.1163	-60.6134	-57.4382	-58.0266
1370	-57.3035	-52.5308	-61.1426	-60.6759	-57.5073	-58.0069
1371	-57.3495	-52.4815	-61.1657	-60.6989	-57.481	-57.9641
1372	-57.3561	-52.4158	-61.1394	-60.6299	-57.4974	-57.9543
1373	-57.3692	-52.4486	-61.1229	-60.7318	-57.5434	-57.8853
1374	-57.3856	-52.4092	-61.1328	-60.6989	-57.6124	-57.8064
1375	-57.4349	-52.3566	-61.1821	-60.5674	-57.5631	-57.7406
1376	-57.4481	-52.2942	-61.1919	-60.5543	-57.6289	-57.8557
1377	-57.4777	-52.2777	-61.1525	-60.5017	-57.6749	-57.8425
1378	-57.4744	-52.1528	-61.1624	-60.4064	-57.6124	-57.7341
1379	-57.527	-52.0476	-61.1985	-60.3801	-57.7176	-57.7406
1380	-57.4842	-52.1988	-61.1985	-60.3965	-57.6946	-57.7209
1381	-57.5927	-52.1364	-61.2478	-60.3932	-57.7275	-57.7472
1382	-57.4711	-52.0706	-61.215	-60.482	-57.7308	-57.7801
1383	-57.4974	-51.9523	-61.2182	-60.5083	-57.7176	-57.7998
1384	-57.4284	-51.9392	-61.2412	-60.4984	-57.7242	-57.7965
1385	-57.4251	-52.0049	-61.2445	-60.5378	-57.711	-57.836
1386	-57.4119	-51.7912	-61.2478	-60.6233	-57.8327	-57.7702
1387	-57.3988	-51.8307	-61.3201	-60.597	-57.8195	-57.7801
1388	-57.287	-51.8044	-61.307	-60.5904	-57.836	-57.7538
1389	-57.287	-51.7419	-61.3464	-60.6923	-57.9477	-57.7308
1390	-57.3298	-51.6433	-61.3103	-60.7844	-57.8918	-57.7341
1391	-57.3298	-51.5513	-61.3201	-60.8271	-57.9806	-57.7045
1392	-57.2443	-51.6105	-61.3004	-60.8632	-57.9872	-57.642
1393	-57.2936	-51.5184	-61.2938	-60.9388	-57.9543	-57.6815
1394	-57.2377	-51.5612	-61.2873	-60.9586	-58.0036	-57.6223
1395	-57.2706	-51.571	-61.4023	-60.8928	-57.9116	-57.6749
1396	-57.241	-51.4691	-61.3793	-60.86	-57.9609	-57.665
1397	-57.3659	-51.4198	-61.33	-60.9158	-57.9148	-57.6946
1398	-57.4021	-51.3376	-61.4681	-60.8008	-57.8655	-57.6354
1399	-57.5336	-51.4724	-61.376	-60.6627	-57.813	-57.6716
1400	-57.5204	-51.2456	-61.376	-60.6167	-57.9411	-57.7176
1401	-57.5434	-51.2095	-61.3168	-60.5608	-57.9181	-57.6848
1402	-57.7012	-51.1799	-61.3234	-60.5214	-57.9214	-57.6223
1403	-57.7932	-51.147	-61.376	-60.505	-57.8754	-57.665
1404	-57.8918	-51.078	-61.3629	-60.5871	-57.8787	-57.6749
1405	-57.9444	-51.0714	-61.261	-60.505	-57.7472	-57.6716
1406	-57.9641	-50.9728	-61.2281	-60.5346	-57.7308	-57.7176
1407	-58.1121	-50.8939	-61.3136	-60.5477	-57.7867	-57.6979
1408	-58.066	-50.8249	-61.33	-60.4754	-57.7439	-57.7604
1409	-58.1679	-50.7065	-61.2117	-60.4984	-57.7834	-57.6387
1410	-58.1647	-50.654	-61.2018	-60.5444	-57.7768	-57.6585
1411	-58.1745	-50.4896	-61.2675	-60.5904	-57.7538	-57.7012
1412	-58.2567	-50.4502	-61.1722	-60.5576	-57.7045	-57.6749
1413	-58.2205	-50.2628	-61.2577	-60.6069	-57.7373	-57.6223
1414	-58.2731	-49.9374	-61.2314	-60.6069	-57.6486	-57.6059
1415	-58.3027	-49.2176	-61.1492	-60.62	-57.5861	-57.6519
1416	-58.2304	-48.3531	-61.1985	-60.5904	-57.619	-57.619
1417	-58.3323	-47.5478	-61.2117	-60.5543	-57.6683	-57.5993
1418	-58.1975	-46.9167	-61.2117	-60.5247	-57.6124	-57.5566
1419	-58.214	-46.5157	-61.2018	-60.4754	-57.55	-57.573
1420	-58.1942	-46.4138	-61.1624	-60.4195	-57.5894	-57.5664
1421	-58.2041	-46.5617	-61.2412	-60.4622	-57.4678	-57.5336
1422	-58.2172	-46.7063	-61.2478	-60.4885	-57.481	-57.596
1423	-58.2205	-47.0022	-61.2445	-60.4622	-57.5566	-57.5894
1424	-58.0989	-47.2487	-61.3267	-60.3603	-57.4842	-57.5697
1425	-58.1252	-47.4755	-61.3366	-60.3866	-57.5007	-57.5171
1426	-58.0989	-47.7746	-61.3234	-60.2683	-57.4514	-57.5763
1427	-58.0167	-48.0704	-61.3859	-60.2453	-57.4448	-57.5007
1428	-57.997	-48.2052	-61.3925	-60.1237	-57.4415	-57.5631
1429	-57.974	-48.4057	-61.3826	-60.0218	-57.4054	-57.5993
1430	-57.905	-48.6095	-61.4122	-60.1007	-57.4612	-57.5927
1431	-57.8228	-48.7935	-61.4155	-60.081	-57.481	-57.6124
1432	-57.8721	-48.9809	-61.4681	-60.0316	-57.4678	-57.5861
1433	-57.8162	-49.0335	-61.445	-59.9659	-57.3298	-57.573
1434	-57.7143	-49.2965	-61.4943	-59.9791	-57.4119	-57.5073
1435	-57.6979	-49.4575	-61.4943	-59.9659	-57.4284	-57.5007
1436	-57.6354	-49.543	-61.616	-59.887	-57.4317	-57.55
1437	-57.5697	-49.7172	-61.6061	-59.818	-57.4349	-57.5467
1438	-57.573	-49.8125	-61.639	-59.6536	-57.4448	-57.5927
1439	-57.4678	-49.9045	-61.5831	-59.5583	-57.4251	-57.5434
1440	-57.4514	-49.9769	-61.685	-59.749	-57.4119	-57.5401
1441	-57.3824	-50.082	-61.6587	-59.7325	-57.3659	-57.5171
1442	-57.3133	-50.1905	-61.7935	-59.6536	-57.3002	-57.5138
1443	-57.3429	-50.2431	-61.8	-59.6536	-57.3856	-57.4382
1444	-57.2772	-50.3055	-61.8	-59.5616	-57.3626	-57.4514
1445	-57.2443	-50.3417	-61.8132	-59.5419	-57.3396	-57.4612
1446	-57.1687	-50.3417	-61.8	-59.4334	-57.3331	-57.5073
1447	-57.1293	-50.4535	-61.6817	-59.3808	-57.3002	-57.5336
1448	-57.0767	-50.46	-61.777	-59.4071	-57.3824	-57.5138
1449	-56.8959	-50.6112	-61.7836	-59.3874	-57.3396	-57.5138
1450	-56.8663	-50.6014	-61.8263	-59.3677	-57.3133	-57.6387
1451	-56.7743	-50.6638	-61.8132	-59.3611	-57.3199	-57.5993
1452	-56.5902	-50.6934	-61.846	-59.2033	-57.3626	-57.6124
1453	-56.5146	-50.7263	-61.9151	-59.1376	-57.3856	-57.5105
1454	-56.4127	-50.8479	-61.9414	-59.1244	-57.3725	-57.6354
1455	-56.37	-50.9005	-61.9545	-59.2	-57.4448	-57.55
1456	-56.3075	-50.9596	-61.9611	-59.177	-57.458	-57.6256
1457	-56.2911	-50.9892	-62.0038	-59.2033	-57.3692	-57.481
1458	-56.176	-50.9958	-61.9644	-59.2559	-57.3626	-57.4547
1459	-56.1366	-50.9925	-61.994	-59.1705	-57.3396	-57.3988
1460	-56.0709	-51.0254	-62.017	-59.1047	-57.3166	-57.4185
1461	-55.8572	-51.0517	-61.9907	-59.108	-57.3462	-57.3462
1462	-55.9065	-51.0878	-61.9447	-59.0521	-57.3626	-57.2443
1463	-55.7454	-51.0484	-61.9677	-59.1277	-57.3791	-57.2542
1464	-55.6731	-51.0451	-62.0005	-59.154	-57.3955	-57.2312
1465	-55.5844	-51.0583	-61.9973	-59.1376	-57.3856	-57.1457
1466	-55.4628	-51.1667	-62.0301	-59.2231	-57.3659	-57.0668
1467	-55.3313	-51.1207	-62.0597	-59.0587	-57.3791	-57.0043
1468	-55.3083	-51.2292	-62.109	-59.1244	-57.4777	-56.9386
1469	-55.2393	-51.193	-62.0794	-58.9897	-57.4744	-56.9386
1470	-55.2097	-51.1667	-62.0334	-59.108	-57.4711	-56.9222
1471	-55.1571	-51.262	-62.04	-59.062	-57.4152	-56.8301
1472	-55.1176	-51.3212	-62.0926	-59.0094	-57.5237	-56.8564
1473	-55.0223	-51.2851	-62.1024	-58.9502	-57.4711	-56.817
1474	-54.9073	-51.3311	-62.086	-58.8549	-57.481	-56.7808
1475	-54.8481	-51.3902	-62.1813	-58.7432	-57.5204	-56.6527
1476	-54.7659	-51.4461	-62.2109	-58.7234	-57.5993	-56.6329
1477	-54.7528	-51.4823	-62.2438	-58.5887	-57.642	-56.6724
1478	-54.6673	-51.4757	-62.2635	-58.5624	-57.6519	-56.5343
1479	-54.6575	-51.5151	-62.2306	-58.5361	-57.5894	-56.554
1480	-54.6082	-51.5842	-62.2635	-58.4769	-57.6848	-56.6198
1481	-54.5917	-51.5612	-62.2043	-58.4736	-57.6026	-56.6033
1482	-54.4701	-51.617	-62.2602	-58.4375	-57.573	-56.5277
1483	-54.4142	-51.6959	-62.2142	-58.375	-57.5336	-56.4817
1484	-54.4833	-51.7617	-62.1452	-58.2797	-57.6091	-56.4752
1485	-54.3945	-51.7189	-62.2306	-58.3191	-57.619	-56.3996
1486	-54.2137	-51.8438	-62.1748	-58.2994	-57.596	-56.4127
1487	-54.1677	-51.8931	-62.1287	-58.3553	-57.5697	-56.4028
1488	-54.2006	-51.8767	-62.201	-58.2665	-57.5566	-56.4291
1489	-54.2269	-51.9687	-62.2076	-58.2403	-57.5993	-56.3864
1490	-54.1414	-51.9885	-62.2438	-58.2731	-57.5007	-56.324
1491	-54.1151	-52.0542	-62.2076	-58.2468	-57.6059	-56.3338
1492	-54.125	-52.018	-62.1583	-58.1351	-57.5763	-56.3667
1493	-54.0329	-52.0575	-62.2898	-58.1219	-57.4448	-56.3601
1494	-54.0198	-52.0739	-62.2766	-58.0923	-57.573	-56.3503
1495	-54.0461	-52.1002	-62.2997	-58.1548	-57.5829	-56.2944
1496	-53.9442	-52.1298	-62.2799	-58.0956	-57.5829	-56.3996
1497	-53.9639	-52.0871	-62.3884	-58.0397	-57.665	-56.3733
1498	-53.8785	-52.1857	-62.372	-58.0891	-57.6617	-56.3108
1499	-53.8127	-52.3007	-62.3851	-58.2271	-57.6026	-56.2845
1500	-53.8456	-52.2547	-62.5034	-58.2468	-57.6223	-56.2221
1501	-53.7601	-52.2711	-62.4673	-58.237	-57.6617	-56.2023
1502	-53.8456	-52.2448	-62.4969	-58.214	-57.6354	-56.2418
1503	-53.724	-52.3139	-62.5363	-58.2665	-57.619	-56.2549
1504	-53.6911	-52.2547	-62.5462	-58.2041	-57.5697	-56.2122
1505	-53.7174	-52.3007	-62.5429	-58.2731	-57.6716	-56.2221
1506	-53.6615	-52.3204	-62.5199	-58.2205	-57.6519	-56.2122
1507	-53.6517	-52.3172	-62.6415	-58.1745	-57.6223	-56.2549
1508	-53.6549	-52.3434	-62.5626	-58.2107	-57.6091	-56.3108
1509	-53.6254	-52.3993	-62.6021	-58.1811	-57.5861	-56.3503
1510	-53.5793	-52.3697	-62.5593	-58.2074	-57.6091	-56.2089
1511	-53.4512	-52.3697	-62.5922	-58.2074	-57.6354	-56.3042
1512	-53.5563	-52.3697	-62.5265	-58.3126	-57.6059	-56.3272
1513	-53.5037	-52.4651	-62.579	-58.352	-57.6716	-56.3141
1514	-53.5563	-52.4388	-62.5593	-58.3389	-57.6519	-56.3305
1515	-53.5268	-52.4651	-62.727	-58.329	-57.619	-56.3601
1516	-53.4709	-52.4946	-62.7105	-58.3421	-57.665	-56.3535
1517	-53.4019	-52.4848	-62.7171	-58.4539	-57.642	-56.3897
1518	-53.4873	-52.5275	-62.819	-58.4868	-57.6387	-56.4028
1519	-53.4117	-52.6064	-62.8059	-58.5821	-57.6585	-56.3503
1520	-53.3854	-52.5965	-62.8124	-58.592	-57.6552	-56.3503
1521	-53.3361	-52.636	-62.8814	-58.5295	-57.7308	-56.4226
1522	-53.3032	-52.6722	-62.819	-58.6807	-57.7012	-56.4653
1523	-53.3	-52.6984	-62.8716	-58.6774	-57.6946	-56.4719
1524	-53.2572	-52.7313	-62.8552	-58.592	-57.6519	-56.4719
1525	-53.3065	-52.7642	-62.8223	-58.5985	-57.7275	-56.4982
1526	-53.2506	-52.7708	-62.8157	-58.5525	-57.7571	-56.5376
1527	-53.3756	-52.8266	-62.8946	-58.6183	-57.8294	-56.5869
1528	-53.4512	-52.8628	-62.8157	-58.5952	-57.836	-56.6066
1529	-53.415	-52.8299	-62.8256	-58.421	-57.7275	-56.5606
1530	-53.4544	-52.8628	-62.9571	-58.3652	-57.7538	-56.6329
1531	-53.5366	-52.8957	-62.9077	-58.4013	-57.6848	-56.5803
1532	-53.4906	-52.9548	-62.8847	-58.3257	-57.7472	-56.6165
1533	-53.4775	-52.9154	-62.8157	-58.2896	-57.7735	-56.6066
1534	-53.5037	-52.922	-62.842	-58.214	-57.7406	-56.6625
1535	-53.4281	-52.8924	-62.7631	-58.0825	-57.7636	-56.6625
1536	-53.3723	-52.9252	-62.7631	-58.0167	-57.8097	-56.7217
1537	-53.3821	-52.8891	-62.7927	-58.0003	-57.8064	-56.7414
1538	-53.3427	-52.9022	-62.888	-57.9543	-57.8392	-56.6559
1539	-53.4939	-52.8694	-62.819	-57.9641	-57.905	-56.6329
1540	-53.3493	-52.8332	-62.8026	-57.9609	-57.928	-56.6527
1541	-53.3657	-52.9515	-62.7763	-57.8491	-57.8853	-56.7085
1542	-53.415	-52.9581	-62.7664	-57.7932	-57.9214	-56.6198
1543	-53.4051	-52.9778	-62.7467	-57.7735	-57.9773	-56.5738
1544	-53.5103	-52.9811	-62.819	-57.7505	-57.974	-56.6231
1545	-53.5103	-53.0403	-62.75	-57.7472	-58.0266	-56.6428
1546	-53.5826	-53.0041	-62.7828	-57.6979	-58.1088	-56.6001
1547	-53.6089	-53.0699	-62.7861	-57.6946	-58.0496	-56.702
1548	-53.6615	-53.1981	-62.8847	-57.7242	-57.9937	-56.6789
1549	-53.6122	-53.1488	-62.8979	-57.6223	-58.043	-56.6658
1550	-53.6089	-53.152	-62.9275	-57.7505	-58.0463	-56.8104
1551	-53.6319	-53.2671	-62.9012	-57.7143	-58.0233	-56.8071
1552	-53.5333	-53.2934	-62.9275	-57.7143	-58.043	-56.7874
1553	-53.6549	-53.323	-62.8716	-57.7275	-58.0595	-56.8104
1554	-53.5662	-53.2704	-62.9045	-57.665	-58.1186	-56.771
1555	-53.6615	-53.2638	-62.9143	-57.5894	-58.0365	-56.7184
1556	-53.6944	-53.2276	-62.911	-57.665	-58.1318	-56.8203
1557	-53.6517	-53.2901	-62.9603	-57.6848	-58.1022	-56.7282
1558	-53.6319	-53.2342	-62.8716	-57.5829	-58.1581	-56.7907
1559	-53.6089	-53.2539	-62.9373	-57.6223	-58.0496	-56.8039
1560	-53.6517	-53.3394	-62.8321	-57.6256	-58.0463	-56.8071
1561	-53.7042	-53.4019	-62.865	-57.619	-58.0365	-56.8334
1562	-53.6944	-53.4347	-62.842	-57.6552	-58.0891	-56.8137
1563	-53.6681	-53.4281	-62.911	-57.6617	-58.1614	-56.7611
1564	-53.6812	-53.4906	-62.9406	-57.642	-58.1679	-56.7874
1565	-53.7305	-53.4939	-62.911	-57.6585	-58.1811	-56.8137
1566	-53.6845	-53.5169	-62.9373	-57.7242	-58.1449	-56.771
1567	-53.6648	-53.5268	-62.9866	-57.7538	-58.2468	-56.8039
1568	-53.7174	-53.5859	-62.865	-57.7505	-58.1614	-56.8301
1569	-53.7766	-53.6056	-62.9406	-57.8031	-58.1614	-56.7644
1570	-53.7207	-53.5793	-62.9603	-57.7636	-58.0989	-56.7644
1571	-53.6549	-53.6024	-62.9833	-57.7373	-58.1318	-56.7973
1572	-53.6418	-53.6517	-62.8946	-57.8195	-58.0956	-56.7874
1573	-53.6024	-53.6615	-62.8387	-57.7965	-58.1548	-56.7644
1574	-53.4019	-53.6024	-62.9045	-57.8984	-58.1153	-56.7282
1575	-53.3657	-53.6056	-62.9209	-57.9083	-58.1384	-56.7611
1576	-53.4019	-53.6254	-62.888	-57.8524	-58.1285	-56.7217
1577	-53.323	-53.6188	-62.9439	-57.8721	-58.1548	-56.7776
1578	-53.3493	-53.5695	-62.9571	-57.8984	-58.1778	-56.8137
1579	-53.2342	-53.6418	-62.9636	-57.8918	-58.1614	-56.7184
1580	-53.2244	-53.6517	-62.9143	-57.997	-58.1614	-56.771
1581	-53.1783	-53.6747	-62.8486	-57.9904	-58.1219	-56.7578
1582	-53.0797	-53.701	-62.8814	-58.0463	-58.0792	-56.7841
1583	-53.0271	-53.7536	-62.8847	-58.1153	-58.1252	-56.771
1584	-53.0896	-53.6681	-62.8979	-58.1285	-58.0891	-56.8039
1585	-53.0238	-53.6254	-62.8256	-58.237	-58.0069	-56.7874
1586	-53.0107	-53.7963	-62.7796	-58.1844	-58.1153	-56.817
1587	-52.922	-53.7601	-62.8321	-58.2074	-58.1186	-56.8137
1588	-52.8233	-53.6944	-62.8617	-58.2435	-58.0069	-56.8137
1589	-52.7116	-53.6911	-62.7828	-58.3257	-58.0891	-56.8104
1590	-52.7412	-53.6714	-62.7533	-58.398	-58.0989	-56.8893
1591	-52.6623	-53.6977	-62.7105	-58.3783	-58.0628	-56.9189
1592	-52.6623	-53.6188	-62.6744	-58.3487	-58.0628	-56.9353
1593	-52.6557	-53.6714	-62.7204	-58.3389	-58.066	-56.9912
1594	-52.4979	-53.6944	-62.773	-58.4408	-58.0463	-56.9419
1595	-52.4158	-53.6878	-62.7894	-58.444	-58.0397	-56.9649
1596	-52.4256	-53.6878	-62.7434	-58.4835	-58.1285	-56.9978
1597	-52.3204	-53.7404	-62.7697	-58.4506	-57.9904	-57.0109
1598	-52.1824	-53.6549	-62.7171	-58.4276	-58.043	-56.9715
1599	-51.788	-53.6418	-62.6546	-58.5361	-58.0693	-57.0701
1600	-51.3278	-53.7042	-62.6579	-58.5558	-58.0891	-57.0175
1601	-50.6671	-53.701	-62.7828	-58.569	-58.0562	-57.0405
1602	-50.0459	-53.6385	-62.7368	-58.5887	-58.0299	-57.0668
1603	-49.5495	-53.6812	-62.7401	-58.6248	-58.0628	-56.9879
1604	-49.1222	-53.6582	-62.6711	-58.5985	-58.1022	-57.0931
1605	-48.8954	-53.6286	-62.7302	-58.6183	-58.0693	-57.0635
1606	-48.9152	-53.6944	-62.7171	-58.6544	-57.997	-57.0504
1607	-48.8856	-53.6747	-62.6481	-58.7037	-58.0595	-57.0734
1608	-49.0072	-53.6254	-62.6941	-58.5952	-58.0134	-57.0701
1609	-49.165	-53.6221	-62.7237	-58.5328	-58.0693	-57.0767
1610	-49.3096	-53.6089	-62.6645	-58.5164	-58.0989	-57.0964
1611	-49.4674	-53.6286	-62.6974	-58.5854	-58.0759	-57.1391
1612	-49.5989	-53.6188	-62.6612	-58.5098	-58.1844	-57.0701
1613	-49.727	-53.7207	-62.6481	-58.5492	-58.0693	-57.1227
1614	-49.8256	-53.7075	-62.6481	-58.5459	-58.0693	-57.0898
1615	-49.9012	-53.7042	-62.7007	-58.5624	-58.0365	-57.195
1616	-50.0853	-53.6517	-62.6645	-58.5952	-58.0792	-57.1358
1617	-50.1938	-53.6615	-62.6744	-58.5427	-58.0693	-57.1391
1618	-50.276	-53.6582	-62.7007	-58.6413	-57.9839	-57.0635
1619	-50.5521	-53.6155	-62.6974	-58.6314	-57.9313	-57.1161
1620	-50.5619	-53.6812	-62.7302	-58.6971	-57.9904	-57.057
1621	-50.6145	-53.7207	-62.773	-58.6478	-57.9576	-57.0832
1622	-50.7493	-53.724	-62.7171	-58.6413	-57.9148	-57.0438
1623	-50.8216	-53.6812	-62.6809	-58.6215	-57.882	-57.0438
1624	-50.8906	-53.6188	-62.6514	-58.6018	-57.9181	-57.0208
1625	-50.9268	-53.7108	-62.6481	-58.5755	-58.0233	-56.9583
1626	-51.1174	-53.6582	-62.6481	-58.6051	-57.9477	-56.9485
1627	-51.1799	-53.6089	-62.6481	-58.5492	-57.9379	-56.8794
1628	-51.239	-53.6352	-62.5922	-58.5985	-57.9839	-56.8203
1629	-51.2653	-53.6188	-62.5955	-58.6413	-57.8688	-56.8236
1630	-51.3212	-53.6648	-62.6185	-58.6939	-57.9017	-56.7184
1631	-51.41	-53.678	-62.5166	-58.5788	-57.8918	-56.6362
1632	-51.4527	-53.6352	-62.5495	-58.6413	-57.8754	-56.6559
1633	-51.5677	-53.678	-62.6086	-58.7201	-57.9214	-56.5277
1634	-51.5973	-53.7601	-62.5922	-58.7399	-57.8721	-56.5672
1635	-51.6598	-53.6714	-62.6152	-58.7432	-57.7702	-56.4719
1636	-51.8011	-53.6385	-62.5988	-58.73	-57.7932	-56.4094
1637	-51.9194	-53.6977	-62.5856	-58.7662	-57.7932	-56.3305
1638	-52.0082	-53.6977	-62.6053	-58.73	-57.7768	-56.3009
1639	-52.1298	-53.6845	-62.5823	-58.7366	-57.813	-56.2484
1640	-52.1758	-53.6845	-62.5593	-58.7826	-57.7998	-56.2615
1641	-52.304	-53.8456	-62.6349	-58.7267	-57.7406	-56.2319
1642	-52.3336	-53.7897	-62.4969	-58.7004	-57.7998	-56.2352
1643	-52.4289	-53.6221	-62.4509	-58.6544	-57.6749	-56.2023
1644	-52.3862	-53.6582	-62.3884	-58.569	-57.7308	-56.2944
1645	-52.5012	-53.6911	-62.3785	-58.6478	-57.7669	-56.2582
1646	-52.6294	-53.6582	-62.3391	-58.5624	-57.7242	-56.2878
1647	-52.7247	-53.6714	-62.2536	-58.4605	-57.7472	-56.2516
1648	-52.7773	-53.5958	-62.2964	-58.4046	-57.7373	-56.2484
1649	-52.8398	-53.6319	-62.1715	-58.4177	-57.7406	-56.2516
1650	-52.8924	-53.6254	-62.2306	-58.4079	-57.7801	-56.2122
1651	-52.9548	-53.6286	-62.178	-58.375	-57.8031	-56.1333
1652	-53.0995	-53.6188	-62.1287	-58.3586	-57.8327	-56.084
1653	-53.1257	-53.5728	-61.9677	-58.3093	-57.7801	-56.0939
1654	-53.1586	-53.5958	-62.0301	-58.306	-57.7702	-56.1136
1655	-53.3	-53.6582	-61.9775	-58.2928	-57.711	-56.0314
1656	-53.3591	-53.6056	-61.9611	-58.2633	-57.7801	-56.038
1657	-53.4183	-53.6089	-62.0235	-58.3093	-57.7669	-55.9788
1658	-53.4446	-53.5695	-62.1123	-58.2665	-57.7472	-55.923
1659	-53.5695	-53.6056	-62.0301	-58.237	-57.7636	-55.8473
1660	-53.6648	-53.6418	-62.0367	-58.306	-57.7143	-55.8441
1661	-53.7568	-53.53	-61.9249	-58.329	-57.6782	-55.7816
1662	-53.862	-53.5498	-61.9315	-58.4408	-57.7242	-55.6698
1663	-53.9015	-53.4281	-61.9348	-58.4342	-57.5993	-55.7389
1664	-53.9968	-53.4643	-61.9578	-58.5262	-57.6387	-55.6436
1665	-54.0001	-53.5333	-61.9282	-58.5098	-57.5927	-55.66
1666	-54.0264	-53.4019	-61.9019	-58.5459	-57.573	-55.6698
1667	-54.1644	-53.3624	-61.8921	-58.5788	-57.5763	-55.6764
1668	-54.1447	-53.3821	-61.9348	-58.638	-57.5894	-55.591
1669	-54.194	-53.323	-61.9151	-58.615	-57.5401	-55.5943
1670	-54.2269	-53.3887	-61.8395	-58.661	-57.5401	-55.637
1671	-54.2466	-53.438	-61.8296	-58.7432	-57.5664	-55.66
1672	-54.3847	-53.3657	-61.8625	-58.707	-57.6322	-55.66
1673	-54.5096	-53.3361	-61.8921	-58.7399	-57.6091	-55.6074
1674	-54.5983	-53.3394	-61.9315	-58.6511	-57.6223	-55.5778
1675	-54.6246	-53.369	-61.9348	-58.6018	-57.5434	-55.5318
1676	-54.5687	-53.4413	-61.9578	-58.5657	-57.573	-55.5647
1677	-54.6345	-53.392	-61.994	-58.5591	-57.5631	-55.5022
1678	-54.8087	-53.2506	-62.0893	-58.6478	-57.642	-55.4858
1679	-54.8152	-53.3723	-62.063	-58.5591	-57.6026	-55.5187
1680	-54.8843	-53.4216	-62.0104	-58.6117	-57.6289	-55.4266
1681	-54.9993	-53.4019	-62.0827	-58.5854	-57.6059	-55.3937
1682	-55.0453	-53.4084	-62.04	-58.6248	-57.5829	-55.3675
1683	-55.0388	-53.4314	-62.1287	-58.6248	-57.6091	-55.374
1684	-55.065	-53.4051	-62.0498	-58.5492	-57.527	-55.328
1685	-55.1505	-53.4512	-62.0663	-58.6183	-57.5894	-55.2853
1686	-55.213	-53.4906	-62.0794	-58.5722	-57.527	-55.3576
1687	-55.2623	-53.4347	-62.0893	-58.4506	-57.4974	-55.3773
1688	-55.236	-53.4873	-62.04	-58.5459	-57.5796	-55.3444
1689	-55.4168	-53.4117	-61.9874	-58.5262	-57.5697	-55.2886
1690	-55.3806	-53.4183	-62.0235	-58.4835	-57.596	-55.3346
1691	-55.4858	-53.3788	-62.0597	-58.5295	-57.5467	-55.282
1692	-55.4858	-53.4446	-62.0268	-58.4638	-57.688	-55.3346
1693	-55.4858	-53.4347	-62.0367	-58.4703	-57.6026	-55.3346
1694	-55.6403	-53.3953	-62.0268	-58.5427	-57.596	-55.282
1695	-55.7093	-53.3986	-62.0203	-58.5459	-57.5861	-55.259
1696	-55.66	-53.3788	-61.9808	-58.5525	-57.5796	-55.236
1697	-55.6929	-53.5268	-61.9874	-58.5755	-57.6124	-55.213
1698	-55.752	-53.4216	-62.0531	-58.6051	-57.5467	-55.1998
1699	-55.752	-53.4019	-62.0433	-58.5887	-57.6091	-55.2064
1700	-55.7948	-53.4413	-62.0531	-58.5952	-57.5763	-55.2031
1701	-55.8276	-53.4446	-62.0038	-58.661	-57.5237	-55.1867
1702	-55.8802	-53.5005	-62.0038	-58.753	-57.5336	-55.1932
1703	-55.8901	-53.4807	-62.0597	-58.7004	-57.5073	-55.1176
1704	-55.9558	-53.5366	-62.0991	-58.7497	-57.5171	-55.1932
1705	-55.9755	-53.5662	-62.1189	-58.7859	-57.5697	-55.1308
1706	-55.9854	-53.4709	-62.0301	-58.6939	-57.4941	-55.1209
1707	-56.0413	-53.6319	-62.0301	-58.8089	-57.527	-55.0848
1708	-56.1234	-53.5761	-62.0071	-58.7859	-57.4645	-55.1834
1709	-56.1728	-53.6484	-62.0137	-58.8779	-57.481	-55.1275
1710	-56.2516	-53.6911	-61.9775	-58.9864	-57.5105	-55.0946
1711	-56.2977	-53.7141	-62.0235	-59.0291	-57.5401	-55.1472
1712	-56.3733	-53.6747	-61.9808	-59.0193	-57.4941	-55.0782
1713	-56.2714	-53.7042	-62.0203	-59.1409	-57.4974	-55.1341
1714	-56.347	-53.7075	-62.0696	-59.0817	-57.573	-55.1472
1715	-56.4554	-53.7568	-62.0367	-59.0981	-57.5993	-55.2425
1716	-56.4784	-53.7568	-62.0597	-59.1639	-57.6059	-55.1242
1717	-56.531	-53.7864	-62.0038	-59.1047	-57.5105	-55.1702
1718	-56.5343	-53.885	-62.0268	-59.0883	-57.6059	-55.0848
1719	-56.6362	-53.8193	-62.0564	-59.0488	-57.5664	-55.1374
1720	-56.6066	-53.8423	-62.0268	-59.0883	-57.7242	-55.1012
1721	-56.6888	-53.8357	-62.0761	-59.062	-57.6913	-55.0979
1722	-56.702	-53.8489	-62.0761	-59.0718	-57.7538	-55.0979
1723	-56.8269	-53.839	-62.1222	-59.0094	-57.7899	-55.1669
1724	-56.7743	-53.8259	-62.1419	-58.9141	-57.8064	-55.1045
1725	-56.7447	-53.8916	-62.0926	-58.8944	-57.7834	-55.2919
1726	-56.8039	-53.9606	-62.1254	-58.9404	-57.8557	-55.1834
1727	-56.8301	-53.9113	-62.178	-58.97	-57.8097	-55.236
1728	-56.8203	-54.0264	-62.1912	-58.9371	-57.8655	-55.2688
1729	-56.886	-54.0592	-62.2043	-59.0423	-57.8261	-55.2294
1730	-56.8959	-53.9705	-62.1386	-58.9831	-57.9017	-55.236
1731	-56.9452	-53.9869	-62.2043	-58.97	-57.928	-55.1867
1732	-56.9846	-53.9869	-62.2043	-58.9502	-57.9411	-55.259
1733	-56.9452	-53.9508	-62.1452	-58.9963	-57.9707	-55.2688
1734	-56.9255	-53.9639	-62.1682	-59.0028	-57.9444	-55.213
1735	-56.84	-53.9804	-62.132	-59.0456	-57.9609	-55.2623
1736	-56.8071	-53.9935	-62.1386	-59.0225	-58.0299	-55.1998
1737	-56.6789	-54.0198	-62.0893	-59.0653	-58.0332	-55.1505
1738	-56.7151	-54.0362	-62.0959	-59.1606	-57.9904	-55.1505
1739	-56.7315	-54.0494	-62.1386	-59.2231	-58.0628	-55.213
1740	-56.6231	-54.0691	-62.1254	-59.1836	-58.0496	-55.213
1741	-56.6527	-54.0527	-62.1123	-59.1902	-58.0595	-55.2393
1742	-56.6198	-54.079	-62.0991	-59.3118	-58.0759	-55.2721
1743	-56.6066	-54.0592	-62.063	-59.3677	-57.9937	-55.2425
1744	-56.6625	-54.0428	-62.0071	-59.4005	-58.0233	-55.19
1745	-56.7348	-54.0954	-62.0893	-59.486	-58.0069	-55.2327
1746	-56.7151	-54.0428	-61.971	-59.5156	-58.0266	-55.259
1747	-56.7776	-54.0527	-62.0334	-59.4992	-58.0266	-55.3017
1748	-56.8104	-54.0428	-62.04	-59.463	-57.9937	-55.2754
1749	-56.7447	-54.1118	-61.994	-59.4926	-57.8853	-55.2393
1750	-56.7052	-54.0198	-61.9184	-59.5945	-57.9346	-55.2294
1751	-56.7282	-54.0888	-61.9282	-59.5024	-57.9477	-55.1932
1752	-56.7808	-54.1447	-62.0301	-59.4794	-57.997	-55.1735
1753	-56.8597	-54.1053	-62.0071	-59.5386	-57.9083	-55.1505
1754	-56.8992	-54.0592	-61.9578	-59.6734	-58.0069	-55.0749
1755	-56.8762	-54.2236	-62.0038	-59.6536	-58.0595	-55.0618
1756	-56.9879	-54.2729	-62.0104	-59.6306	-58.0595	-55.0946
1757	-56.9978	-54.2762	-61.9282	-59.6471	-58.0595	-55.0618
1758	-56.9156	-54.3288	-62.0104	-59.7785	-58.0792	-55.0979
1759	-56.9781	-54.3879	-61.9775	-59.7161	-57.9872	-55.0486
1760	-56.9255	-54.3518	-61.9118	-59.9528	-58.0036	-55.0486
1761	-56.9057	-54.3584	-61.9217	-59.9528	-58.043	-55.0125
1762	-56.8696	-54.3386	-61.8855	-60.0547	-58.0299	-55.0092
1763	-56.9649	-54.3649	-61.9742	-59.9593	-58.0036	-54.9599
1764	-56.9781	-54.3715	-61.9315	-59.9856	-57.9904	-54.9566
1765	-56.886	-54.4044	-61.9677	-60.0349	-57.9707	-54.996
1766	-56.8597	-54.3649	-61.9808	-60.0185	-57.9379	-54.9993
1767	-56.7973	-54.4274	-62.0597	-59.9988	-58.043	-54.8941
1768	-56.8499	-54.3978	-61.9973	-59.9659	-58.0069	-54.9007
1769	-56.9518	-54.4339	-62.0334	-60.0284	-57.9806	-54.8974
1770	-56.9057	-54.5096	-62.0005	-59.9988	-57.9937	-54.8284
1771	-56.8827	-54.4734	-62.0334	-60.0941	-57.9674	-54.8448
1772	-56.8137	-54.4701	-62.04	-60.1763	-57.974	-54.835
1773	-56.886	-54.5096	-62.0991	-60.1138	-57.9806	-54.8317
1774	-56.8039	-54.4504	-62.017	-60.173	-57.9576	-54.7627
1775	-56.8367	-54.4175	-61.9808	-60.2124	-57.9017	-54.687
1776	-56.8137	-54.4339	-62.017	-60.265	-57.9017	-54.7166
1777	-56.8663	-54.3912	-62.0367	-60.265	-57.9247	-54.7035
1778	-56.8071	-54.4208	-61.9907	-60.3538	-57.951	-54.6805
1779	-56.771	-54.3945	-61.994	-60.334	-57.9707	-54.6509
1780	-56.7841	-54.3748	-62.0203	-60.1861	-58.0299	-54.6838
1781	-56.7151	-54.3123	-62.0038	-60.2157	-58.0233	-54.7002
1782	-56.6494	-54.3288	-62.0203	-60.1828	-57.905	-54.6575
1783	-56.6231	-54.3551	-61.9512	-60.2946	-57.8918	-54.6575
1784	-56.6822	-54.3879	-62.0498	-60.334	-57.7308	-54.7166
1785	-56.6658	-54.4438	-61.9479	-60.3472	-57.8885	-54.7068
1786	-56.5738	-54.4931	-61.9841	-60.4064	-57.9674	-54.7002
1787	-56.6658	-54.4767	-61.9315	-60.4294	-57.8458	-54.7396
1788	-56.6099	-54.5917	-62.0005	-60.482	-57.8097	-54.7298
1789	-56.439	-54.5194	-62.0268	-60.3702	-57.8294	-54.572
1790	-56.4423	-54.5523	-62.0301	-60.4557	-57.7834	-54.6838
1791	-56.4587	-54.6049	-61.9677	-60.4228	-57.7834	-54.664
1792	-56.3733	-54.5096	-61.9677	-60.3932	-57.7834	-54.6608
1793	-56.4028	-54.5391	-61.9545	-60.4458	-57.7505	-54.6838
1794	-56.3996	-54.5128	-61.9841	-60.4129	-57.7308	-54.6345
1795	-56.3207	-54.5523	-61.9545	-60.3505	-57.7604	-54.6542
1796	-56.3601	-54.5589	-61.9841	-60.4425	-57.7308	-54.7035
1797	-56.347	-54.5884	-61.9677	-60.3932	-57.7702	-54.6838
1798	-56.3667	-54.6147	-61.9447	-60.4228	-57.8097	-54.7331
1799	-56.3864	-54.6082	-61.9118	-60.4524	-57.8031	-54.7199
1800	-56.37	-54.6049	-61.8822	-60.4031	-57.7867	-54.7002
1801	-56.3404	-54.6377	-61.8296	-60.505	-57.7965	-54.7166
1802	-56.3141	-54.6312	-61.8822	-60.4885	-57.8097	-54.7166
1803	-56.3601	-54.6082	-61.9151	-60.5115	-57.8918	-54.7232
1804	-56.3568	-54.5917	-61.8723	-60.5904	-57.8688	-54.7429
1805	-56.3831	-54.5523	-61.8954	-60.6726	-57.8721	-54.7429
1806	-56.3864	-54.5391	-61.8526	-60.7482	-57.8524	-54.7462
1807	-56.3963	-54.503	-61.7705	-60.8632	-57.8557	-54.8251
1808	-56.3996	-54.4964	-61.7606	-60.8501	-57.905	-54.8613
1809	-56.3765	-54.4077	-61.7737	-60.8501	-57.8754	-54.7857
1810	-56.3503	-54.3452	-61.7113	-60.8567	-57.8195	-54.7298
1811	-56.4357	-54.3912	-61.7442	-60.8139	-57.8491	-54.8021
1812	-56.4226	-54.3255	-61.7442	-60.8534	-57.9346	-54.8087
1813	-56.4719	-54.3353	-61.6784	-60.8402	-57.8688	-54.8415
1814	-56.3634	-54.3485	-61.593	-60.7877	-57.7702	-54.8514
1815	-56.5113	-54.3879	-61.6587	-60.7022	-57.7899	-54.8876
1816	-56.4719	-54.4142	-61.6291	-60.6989	-57.8327	-54.996
1817	-56.4686	-54.4011	-61.5897	-60.7383	-57.6979	-54.9927
1818	-56.4193	-54.3353	-61.5897	-60.7942	-57.7801	-54.9763
1819	-56.2385	-54.4241	-61.5338	-60.7219	-57.6453	-55.0355
1820	-56.3864	-54.4504	-61.5667	-60.7153	-57.7045	-54.9763
1821	-56.4324	-54.4339	-61.5305	-60.7646	-57.5566	-54.9697
1822	-56.37	-54.3058	-61.5667	-60.7581	-57.5993	-55.0355
1823	-56.324	-54.4109	-61.5206	-60.7614	-57.5631	-55.042
1824	-56.3009	-54.4405	-61.5009	-60.7252	-57.4284	-55.0453
1825	-56.2944	-54.4241	-61.5009	-60.7186	-57.4612	-55.0519
1826	-56.2286	-54.3518	-61.4648	-60.7383	-57.4875	-54.9599
1827	-56.1892	-54.2663	-61.4549	-60.7482	-57.3659	-55.1242
1828	-56.153	-54.286	-61.5535	-60.7088	-57.3035	-55.1078
1829	-56.2188	-54.2203	-61.3826	-60.6529	-57.3331	-55.1702
1830	-56.1859	-54.0921	-61.4582	-60.6989	-57.2805	-55.0946
1831	-56.1728	-54.1184	-61.3892	-60.7022	-57.3035	-55.2031
1832	-56.2516	-54.0461	-61.3464	-60.6102	-57.2476	-55.1702
1833	-56.3503	-53.9738	-61.3596	-60.6627	-57.1884	-55.2228
1834	-56.3042	-53.9804	-61.3004	-60.6595	-57.2509	-55.2754
1835	-56.3437	-53.8949	-61.3004	-60.7088	-57.2476	-55.2294
1836	-56.3207	-53.8489	-61.3168	-60.6496	-57.1687	-55.305
1837	-56.3305	-53.7766	-61.2675	-60.6036	-57.1621	-55.3247
1838	-56.3075	-53.8094	-61.2478	-60.62	-57.1687	-55.3642
1839	-56.2878	-53.8226	-61.1722	-60.5839	-57.0931	-55.3444
1840	-56.3108	-53.7503	-61.1919	-60.6003	-56.9583	-55.3937
1841	-56.3667	-53.8193	-61.2248	-60.5115	-56.9452	-55.3872
1842	-56.3535	-53.793	-61.2051	-60.5576	-56.9057	-55.3444
1843	-56.3075	-53.7503	-61.1591	-60.6003	-56.8893	-55.3642
1844	-56.3404	-53.701	-61.1788	-60.5937	-56.886	-55.3576
1845	-56.4357	-53.6648	-61.1722	-60.5806	-56.932	-55.3872
1846	-56.3535	-53.6089	-61.1919	-60.5543	-56.8926	-55.3937
1847	-56.3634	-53.5563	-61.1624	-60.551	-56.9846	-55.3477
1848	-56.3733	-53.4972	-61.1098	-60.5313	-56.9189	-55.3576
1849	-56.2878	-53.4314	-61.1196	-60.5444	-56.886	-55.2754
1850	-56.2779	-53.438	-61.0769	-60.505	-56.8762	-55.328
1851	-56.2549	-53.4051	-60.975	-60.6102	-56.8269	-55.3675
1852	-56.2089	-53.3854	-61.09	-60.4885	-56.9123	-55.3116
1853	-56.153	-53.3493	-61.0966	-60.5543	-56.8269	-55.2919
1854	-56.2484	-53.3986	-61.0802	-60.5148	-56.7282	-55.2623
1855	-56.153	-53.2539	-61.0605	-60.4787	-56.7381	-55.2886
1856	-56.1136	-53.2079	-61.0506	-60.4622	-56.7808	-55.3247
1857	-56.1037	-53.2474	-61.0473	-60.459	-56.6527	-55.2261
1858	-56.1497	-53.1455	-61.0933	-60.3866	-56.6461	-55.282
1859	-56.0511	-53.1389	-61.1492	-60.4064	-56.6329	-55.3116
1860	-56.1662	-53.1783	-61.1295	-60.4064	-56.5968	-55.3149
1861	-56.1497	-53.1783	-61.0112	-60.3603	-56.6329	-55.2425
1862	-56.1695	-53.1225	-61.1426	-60.3012	-56.6428	-55.3346
1863	-56.0873	-52.9746	-61.021	-60.311	-56.6132	-55.3247
1864	-56.2155	-53.06	-61.0046	-60.3143	-56.6231	-55.3412
1865	-56.1629	-53.0238	-61.1525	-60.3373	-56.6099	-55.3149
1866	-56.1465	-53.0041	-61.1788	-60.3308	-56.6165	-55.3181
1867	-56.084	-52.9351	-61.1985	-60.3242	-56.6954	-55.2754
1868	-56.1202	-52.9417	-61.0835	-60.311	-56.6033	-55.2754
1869	-56.2056	-52.945	-61.1163	-60.2322	-56.6001	-55.2195
1870	-56.1366	-52.9976	-61.0638	-60.1467	-56.5902	-55.1998
1871	-56.0972	-52.9351	-61.0407	-60.081	-56.6428	-55.1637
1872	-56.015	-52.9417	-61.1032	-60.1335	-56.6066	-55.1144
1873	-56.0084	-52.9318	-61.1755	-60.1105	-56.6066	-55.1472
1874	-55.9755	-52.9121	-61.067	-60.2453	-56.5902	-55.19
1875	-55.8999	-52.8661	-61.1394	-60.2256	-56.6395	-55.1768
1876	-55.8408	-52.9548	-61.1131	-60.2847	-56.6231	-55.2524
1877	-55.9032	-52.9483	-61.0112	-60.3143	-56.6954	-55.1998
1878	-55.8605	-53.0041	-61.0473	-60.3538	-56.6559	-55.2097
1879	-55.9098	-52.9614	-61.0736	-60.3965	-56.7282	-55.2228
1880	-55.8375	-52.968	-61.0999	-60.4557	-56.6658	-55.2031
1881	-55.821	-53.0567	-61.1657	-60.4721	-56.6527	-55.1604
1882	-55.8408	-52.9614	-61.0736	-60.4622	-56.6691	-55.2393
1883	-55.7619	-53.0041	-61.1065	-60.4885	-56.7217	-55.1834
1884	-55.6698	-52.9943	-61.1361	-60.459	-56.6855	-55.3214
1885	-55.7619	-52.9778	-61.1558	-60.4359	-56.7677	-55.3116
1886	-55.6994	-53.0206	-61.1492	-60.3505	-56.748	-55.2787
1887	-55.729	-52.9647	-61.1657	-60.3439	-56.7447	-55.3773
1888	-55.7685	-53.014	-61.0703	-60.3669	-56.7545	-55.3872
1889	-55.729	-53.0469	-61.0999	-60.2815	-56.6789	-55.328
1890	-55.8079	-53.0304	-61.1295	-60.3899	-56.7414	-55.3576
1891	-55.7126	-53.0304	-61.1591	-60.4327	-56.7545	-55.3149
1892	-55.6337	-53.0337	-61.2215	-60.4524	-56.771	-55.328
1893	-55.7027	-53.1093	-61.2347	-60.4162	-56.8236	-55.3444
1894	-55.729	-52.9318	-61.1985	-60.4162	-56.794	-55.3675
1895	-55.6271	-52.9746	-61.238	-60.3636	-56.7545	-55.3707
1896	-55.7093	-52.9055	-61.2445	-60.3669	-56.7907	-55.4463
1897	-55.7553	-52.8891	-61.3037	-60.3373	-56.9156	-55.3576
1898	-55.7487	-52.8924	-61.3333	-60.3735	-56.9189	-55.351
1899	-55.7323	-52.8957	-61.2741	-60.4721	-56.8696	-55.3379
1900	-55.7586	-52.8825	-61.3333	-60.5839	-56.8893	-55.351
1901	-55.6567	-52.8332	-61.3629	-60.4129	-56.8334	-55.4299
1902	-55.6731	-52.8398	-61.3431	-60.4622	-56.8992	-55.4463
1903	-55.5745	-52.8694	-61.3464	-60.4622	-56.8137	-55.5252
1904	-55.5351	-52.7609	-61.2906	-60.4951	-56.8433	-55.5252
1905	-55.6107	-52.728	-61.261	-60.5313	-56.7118	-55.5482
1906	-55.5679	-52.7609	-61.2347	-60.4491	-56.8334	-55.4661
1907	-55.5351	-52.7149	-61.2117	-60.4557	-56.7348	-55.4693
1908	-55.4463	-52.7543	-61.2051	-60.459	-56.8039	-55.4759
1909	-55.4332	-52.8003	-61.2445	-60.3899	-56.8236	-55.4003
1910	-55.3379	-52.7905	-61.1558	-60.4064	-56.8301	-55.4398
1911	-55.3444	-52.8003	-61.1591	-60.3472	-56.8137	-55.5515
1912	-55.3116	-52.7313	-61.2511	-60.4129	-56.8532	-55.4693
1913	-55.3017	-52.8168	-61.2577	-60.4162	-56.8104	-55.5285
1914	-55.2524	-52.7905	-61.307	-60.4294	-56.702	-55.4661
1915	-55.2393	-52.8299	-61.2807	-60.4852	-56.7085	-55.5844
1916	-55.1341	-52.8891	-61.2051	-60.5444	-56.725	-55.5482
1917	-55.2195	-52.8661	-61.2347	-60.5346	-56.6987	-55.5384
1918	-55.1406	-52.8661	-61.2445	-60.5641	-56.7414	-55.5285
1919	-55.1867	-52.8299	-61.2182	-60.5608	-56.6724	-55.5614
1920	-55.0683	-52.8825	-61.215	-60.5181	-56.7348	-55.5581
1921	-55.0355	-52.8168	-61.2938	-60.4787	-56.6395	-55.4891
1922	-55.019	-52.8135	-61.3136	-60.5543	-56.6987	-55.5482
1923	-55.0585	-52.8398	-61.2807	-60.6332	-56.6592	-55.5943
1924	-54.9697	-52.8661	-61.2807	-60.6266	-56.6066	-55.5581
1925	-54.8843	-52.8135	-61.3629	-60.6266	-56.7217	-55.5088
1926	-54.8218	-52.9022	-61.2807	-60.4984	-56.7052	-55.5252
1927	-54.7988	-52.8003	-61.2643	-60.5674	-56.6494	-55.4332
1928	-54.8087	-52.8233	-61.33	-60.6036	-56.6198	-55.5187
1929	-54.7298	-52.8726	-61.2807	-60.6266	-56.6296	-55.4891
1930	-54.7232	-52.8661	-61.284	-60.6069	-56.5738	-55.4891
1931	-54.6608	-52.9417	-61.3004	-60.5871	-56.5343	-55.5055
1932	-54.5753	-52.9154	-61.2511	-60.5806	-56.5442	-55.4956
1933	-54.6016	-52.9548	-61.2248	-60.5937	-56.5179	-55.4792
1934	-54.4865	-52.9614	-61.2741	-60.6529	-56.5212	-55.5712
1935	-54.5391	-52.9877	-61.3694	-60.7088	-56.5803	-55.6205
1936	-54.4898	-52.9778	-61.2314	-60.7712	-56.4916	-55.6534
1937	-54.4734	-53.0337	-61.1985	-60.7449	-56.5606	-55.6863
1938	-54.3978	-52.9318	-61.215	-60.7646	-56.5573	-55.7027
1939	-54.4044	-52.9187	-61.2347	-60.666	-56.5672	-55.706
1940	-54.4142	-53.0633	-61.2445	-60.7712	-56.5014	-55.7126
1941	-54.4044	-53.0567	-61.2051	-60.8435	-56.5639	-55.706
1942	-54.3847	-53.083	-61.1952	-60.9388	-56.485	-55.6205
1943	-54.3584	-53.1652	-61.1328	-60.7877	-56.4061	-55.8013
1944	-54.3518	-53.1225	-61.1328	-60.8665	-56.4357	-55.6961
1945	-54.3288	-53.1619	-61.2051	-60.8172	-56.324	-55.7257
1946	-54.3452	-53.1159	-61.1722	-60.9027	-56.2648	-55.7816
1947	-54.4307	-53.2079	-61.1821	-60.7745	-56.3075	-55.7389
1948	-54.2959	-53.1323	-61.1525	-60.7614	-56.2484	-55.66
1949	-54.3584	-53.1882	-61.1295	-60.7942	-56.1662	-55.5745
1950	-54.4208	-53.1849	-61.1689	-60.7383	-56.1234	-55.5417
1951	-54.4603	-53.2474	-61.2314	-60.6726	-56.0544	-55.5318
1952	-54.4471	-53.1159	-61.215	-60.7285	-55.969	-55.6041
1953	-54.5227	-53.1422	-61.2347	-60.7318	-55.9361	-55.5778
1954	-54.595	-53.1389	-61.1722	-60.7515	-55.8736	-55.5482
1955	-54.572	-53.1422	-61.1328	-60.7351	-55.8408	-55.5614
1956	-54.503	-53.0764	-61.3168	-60.62	-55.7882	-55.5548
1957	-54.5753	-53.0501	-61.2643	-60.6167	-55.6633	-55.6008
1958	-54.6246	-53.1257	-61.2577	-60.6003	-55.6698	-55.591
1959	-54.6312	-53.1356	-61.2938	-60.5477	-55.5055	-55.5679
1960	-54.5917	-53.1257	-61.2281	-60.5444	-55.5187	-55.5482
1961	-54.595	-53.1093	-61.2577	-60.5543	-55.4693	-55.5679
1962	-54.6509	-53.1257	-61.238	-60.5214	-55.4792	-55.5712
1963	-54.7035	-53.1093	-61.215	-60.5313	-55.3346	-55.5384
1964	-54.8021	-53.037	-61.215	-60.5707	-55.3543	-55.5975
1965	-54.7331	-53.2342	-61.284	-60.4754	-55.282	-55.5384
1966	-54.7429	-53.129	-61.3136	-60.5181	-55.2491	-55.5745
1967	-54.6969	-53.1488	-61.3004	-60.5247	-55.213	-55.6041
1968	-54.618	-53.2112	-61.2971	-60.4951	-55.2228	-55.5384
1969	-54.6345	-53.1586	-61.4549	-60.4688	-55.1834	-55.5745
1970	-54.7265	-53.1488	-61.3859	-60.4951	-55.0486	-55.5022
1971	-54.7331	-53.0764	-61.4845	-60.4162	-55.0979	-55.5022
1972	-54.7265	-53.0863	-61.4582	-60.4425	-55.1045	-55.4956
1973	-54.812	-53.0863	-61.3596	-60.4228	-55.2163	-55.4135
1974	-54.7725	-53.1849	-61.376	-60.505	-55.1275	-55.3872
1975	-54.7528	-53.2408	-61.4122	-60.4359	-55.0453	-55.4562
1976	-54.7429	-53.2474	-61.3366	-60.3472	-55.0388	-55.4036
1977	-54.7627	-53.2145	-61.4319	-60.3538	-54.9369	-55.3444
1978	-54.7101	-53.2539	-61.5174	-60.4261	-54.9106	-55.2951
1979	-54.7758	-53.3427	-61.4845	-60.4195	-54.973	-55.3379
1980	-54.6903	-53.3624	-61.4779	-60.4129	-54.8908	-55.2754
1981	-54.7429	-53.3262	-61.445	-60.4787	-54.7758	-55.3707
1982	-54.7462	-53.3098	-61.4648	-60.5904	-54.7857	-55.4365
1983	-54.7298	-53.3526	-61.4286	-60.5806	-54.6772	-55.4365
1984	-54.7725	-53.2276	-61.4549	-60.5477	-54.5654	-55.397
1985	-54.7922	-53.2737	-61.5009	-60.5181	-54.6082	-55.4956
1986	-54.8284	-53.3	-61.5174	-60.4984	-54.6673	-55.4595
1987	-54.8284	-53.2211	-61.4911	-60.6365	-54.6114	-55.4891
1988	-54.8514	-53.2112	-61.5141	-60.666	-54.5819	-55.4398
1989	-55.019	-53.2506	-61.4746	-60.5378	-54.618	-55.4726
1990	-54.95	-53.2079	-61.4122	-60.5674	-54.549	-55.4102
1991	-54.9829	-53.2474	-61.399	-60.5904	-54.4931	-55.4891
1992	-54.9467	-53.2605	-61.4418	-60.6397	-54.5227	-55.5121
1993	-54.95	-53.2934	-61.4155	-60.6627	-54.5194	-55.4891
1994	-54.973	-53.2375	-61.3267	-60.6627	-54.503	-55.443
1995	-54.9862	-53.2671	-61.3563	-60.5937	-54.4603	-55.4825
1996	-54.9829	-53.2737	-61.3662	-60.5641	-54.4372	-55.5154
1997	-54.9401	-53.2112	-61.3201	-60.5707	-54.4241	-55.4956
[truncated: 28,004 more rows]
