# Supplementary material for: Hierarchical architecture of dopaminergic circuits enables second-order conditioning in Drosophila
Source: eLife journal article supplement (doi:10.7554/elife.79042), 2023-01-24
Supplement: fig5-data1 [file Figure_5C.xlsx]

## Sheet: Sheet1
	OCT						MCH
	Pre		Post1		Post2		Pre		Post1		Post2
Time (x10^-4) (sec)	Mean	SEM	Mean	SEM	Mean	SEM	Mean	SEM	Mean	SEM	Mean	SEM
1	4.63313	1.10725	2.21353	0.885906	3.16086	1.30029	3.99162	1.84101	3.73583	1.63149	2.72114	1.1266
2	4.70978	1.22907	2.11845	0.855108	3.16689	1.3338	4.09149	1.90816	3.61662	1.52782	2.69267	1.09239
3	4.77859	1.351	2.01558	0.824964	3.16127	1.3531	4.16802	1.95795	3.46716	1.40728	2.67801	1.06451
4	4.83147	1.46446	1.91194	0.797168	3.14969	1.36009	4.21922	1.98524	3.30071	1.27861	2.68197	1.04663
5	4.86168	1.5629	1.81491	0.773241	3.13899	1.35994	4.24553	1.98523	3.13465	1.15232	2.7057	1.03896
6	4.86534	1.64171	1.73149	0.754238	3.13579	1.3597	4.24947	1.95456	2.98731	1.03869	2.74605	1.03712
7	4.84237	1.69813	1.66777	0.740745	3.14527	1.36669	4.23538	1.89248	2.87459	0.945759	2.79593	1.03316
8	4.79647	1.73116	1.62871	0.733285	3.17005	1.3868	4.20903	1.80154	2.80707	0.877844	2.84559	1.01839
9	4.73432	1.74131	1.61804	0.733069	3.20964	1.42295	4.17709	1.68785	2.78824	0.83515	2.88458	0.986266
10	4.66419	1.73041	1.63825	0.742802	3.26032	1.47409	4.14651	1.56074	2.81404	0.814523	2.9039	0.934283
11	4.59427	1.70123	1.69055	0.76698	3.31563	1.53508	4.12372	1.43172	2.87379	0.810612	2.89789	0.864261
12	4.53119	1.65712	1.7747	0.811067	3.36721	1.59755	4.1138	1.31281	2.9522	0.81684	2.86545	0.781483
13	4.47897	1.60166	1.88891	0.879468	3.40605	1.65138	4.1196	1.21415	3.032	0.826244	2.81023	0.693135
14	4.4387	1.5382	2.02981	0.973374	3.42387	1.68655	4.14114	1.14143	3.09689	0.832506	2.74011	0.606662
15	4.40879	1.46957	2.19267	1.08997	3.41434	1.69498	4.17542	1.09462	3.13413	0.831081	2.66592	0.528584
16	4.3858	1.39786	2.37184	1.22332	3.37426	1.6722	4.21675	1.06919	3.13642	0.820008	2.59976	0.464131
17	4.36538	1.32432	2.56137	1.36607	3.30403	1.61826	4.25762	1.0593	3.10279	0.800024	2.55321	0.41777
18	4.34333	1.24947	2.75568	1.51093	3.20778	1.53796	4.28996	1.06093	3.03823	0.773924	2.53558	0.394108
19	4.31631	1.17336	2.95007	1.65169	3.09275	1.44002	4.30664	1.07297	2.95233	0.745497	2.55233	0.39776
20	4.28231	1.09609	3.14087	1.7836	2.96824	1.33544	4.30272	1.09617	2.85704	0.718635	2.60396	0.431125
21	4.24087	1.01836	3.3253	1.90345	2.84427	1.23522	4.27627	1.13094	2.76432	0.697113	2.68537	0.492005
22	4.19298	0.941809	3.50086	2.00928	2.73015	1.14821	4.22866	1.17548	2.68399	0.684986	2.78613	0.573788
23	4.14082	0.868891	3.6646	2.09989	2.63325	1.07957	4.16412	1.22516	2.62247	0.686795	2.89161	0.667265
24	4.08737	0.802104	3.81242	2.1743	2.5582	1.03058	4.08892	1.27342	2.58246	0.706643	2.98502	0.762095
25	4.03577	0.742951	3.93879	2.23128	2.50658	0.99949	4.0103	1.31321	2.5636	0.746246	3.0502	0.847794
26	3.98865	0.691291	4.03716	2.26914	2.47712	0.983049	3.93537	1.33836	2.56374	0.803521	3.07439	0.914722
27	3.94739	0.645697	4.10101	2.28602	2.46638	0.977611	3.87034	1.34439	2.58038	0.873066	3.05075	0.955271
28	3.91171	0.604768	4.12543	2.28053	2.46976	0.979722	3.81999	1.32913	2.61163	0.948131	2.97978	0.965186
29	3.87967	0.568645	4.1088	2.25272	2.48241	0.986119	3.78748	1.29293	2.65652	1.02273	2.86942	0.944881
30	3.84808	0.539795	4.05395	2.20485	2.50013	0.993414	3.77435	1.23896	2.71451	1.09306	2.73373	0.900699
31	3.8135	0.522483	3.96848	2.14185	2.51969	0.997759	3.78065	1.17342	2.78449	1.15804	2.59048	0.845976
32	3.77319	0.52088	3.86398	2.07105	2.53882	0.994905	3.80505	1.10566	2.86362	1.21895	2.45819	0.801078
33	3.72596	0.536696	3.75434	2.00137	2.55576	0.980893	3.84507	1.04787	2.94655	1.27834	2.35324	0.789658
34	3.67246	0.56799	3.65359	1.94192	2.56866	0.953323	3.89745	1.01334	3.02543	1.33832	2.28769	0.828466
35	3.61485	0.609895	3.57377	1.90058	2.57511	0.912786	3.95852	1.01259	3.09063	1.39899	2.26822	0.917628
36	3.55599	0.656195	3.5234	1.88251	2.57206	0.863922	4.02487	1.04854	3.13222	1.45772	2.29599	1.04341
37	3.4985	0.700551	3.50662	1.8894	2.55614	0.815533	4.09386	1.11492	3.14167	1.50952	2.36747	1.18871
38	3.44402	0.73725	3.52314	1.91925	2.52449	0.779037	4.16397	1.19946	3.11339	1.54852	2.47569	1.33942
39	3.39304	0.761869	3.56874	1.96705	2.47564	0.764672	4.23477	1.28902	3.04583	1.56954	2.61145	1.48555
40	3.34518	0.772086	3.63612	2.02587	2.41033	0.77652	4.30649	1.37319	2.94176	1.56946	2.76436	1.62004
41	3.2999	0.768547	3.71591	2.08813	2.33192	0.81002	4.37921	1.44556	2.80783	1.54779	2.92339	1.7374
42	3.25726	0.755478	3.79784	2.14666	2.24627	0.854295	4.45203	1.50342	2.6536	1.50663	3.07725	1.83248
43	3.21829	0.740554	3.872	2.19551	2.16113	0.896725	4.52249	1.54663	2.49028	1.45	3.21458	1.89992
44	3.18495	0.733388	3.93002	2.23041	2.08522	0.926414	4.58645	1.57619	2.32942	1.38291	3.32431	1.93439
45	3.15958	0.742389	3.96632	2.249	2.02707	0.936002	4.63866	1.59333	2.18198	1.31033	3.39632	1.93142
46	3.14408	0.771229	3.97891	2.25095	1.994	0.922821	4.67372	1.59932	2.05767	1.23636	3.42234	1.88873
47	3.13918	0.817586	3.96977	2.23792	1.99119	0.89016	4.68727	1.59569	1.96487	1.16393	3.39703	1.80718
48	3.14404	0.875227	3.94449	2.21339	2.02102	0.848816	4.67695	1.58433	1.91082	1.09505	3.31885	1.69131
49	3.15645	0.937403	3.91114	2.1824	2.08275	0.817981	4.64288	1.5669	1.90199	1.03174	3.19064	1.549
50	3.17345	0.999233	3.87865	2.15094	2.17244	0.822014	4.58761	1.54385	1.94423	0.97725	3.01948	1.3904
51	3.19228	1.05845	3.85477	2.12499	2.28332	0.879345	4.51553	1.51373	2.0426	0.937105	2.81601	1.22658
52	3.21129	1.11502	3.84427	2.10913	2.40644	0.990667	4.43216	1.47349	2.20064	0.918954	2.59308	1.06804
53	3.23054	1.17015	3.84761	2.1051	2.53158	1.14054	4.34341	1.41993	2.41925	0.930664	2.3643	0.923692
54	3.25177	1.22539	3.86045	2.11069	2.64827	1.30823	4.25512	1.35152	2.69533	0.977011	2.14251	0.800245
55	3.27802	1.28179	3.87417	2.11976	2.74682	1.47505	4.1729	1.26978	3.02075	1.05732	1.93868	0.702191
56	3.31271	1.3396	3.87727	2.12333	2.81917	1.62638	4.10205	1.1796	3.38186	1.16597	1.76148	0.632012
57	3.35879	1.39795	3.85738	2.11159	2.85946	1.75141	4.04756	1.08841	3.76006	1.29481	1.61724	0.590488
58	3.41796	1.45477	3.80354	2.0761	2.86444	1.84243	4.01399	1.00469	4.1332	1.43537	1.51044	0.577008
59	3.49032	1.50665	3.70821	2.01154	2.83369	1.89426	4.00518	0.936092	4.47785	1.57991	1.44416	0.589901
60	3.57447	1.54902	3.56872	1.91665	2.76971	1.90395	4.0239	0.888119	4.77185	1.72153	1.42037	0.626659
61	3.6679	1.57683	3.38799	1.79439	2.67796	1.87084	4.07157	0.863817	4.99685	1.85392	1.43987	0.683894
62	3.76752	1.58579	3.17435	1.65132	2.56677	1.7969	4.14791	0.8643	5.14018	1.97118	1.50193	0.75709
63	3.87017	1.57395	2.94056	1.49659	2.44685	1.68718	4.25081	0.889293	5.1961	2.0677	1.60377	0.840523
64	3.97278	1.54303	2.70216	1.34072	2.33056	1.55001	4.37612	0.936888	5.16599	2.13838	1.74029	0.927607
65	4.0724	1.49905	2.47537	1.19439	2.23063	1.39721	4.51752	1.00287	5.05788	2.17918	1.90417	1.0117
66	4.16598	1.4513	2.2749	1.06724	2.15862	1.24389	4.66638	1.08059	4.88529	2.18774	2.08655	1.0872
67	4.25011	1.40957	2.1119	0.966497	2.12321	1.10797	4.81185	1.16175	4.66564	2.16398	2.27807	1.15064
68	4.3209	1.3803	1.99256	0.895623	2.12875	1.00804	4.94134	1.23783	4.41845	2.11041	2.47008	1.20137
69	4.37408	1.36357	1.91762	0.853421	2.17438	0.958066	5.04142	1.3014	4.16352	2.03198	2.65572	1.24154
70	4.40532	1.35324	1.8829	0.834643	2.25393	0.959911	5.09929	1.34706	3.91913	1.93536	2.83053	1.27521
71	4.4108	1.34006	1.88095	0.832098	2.35672	1.00144	5.10454	1.37182	3.70054	1.82794	2.99252	1.30681
72	4.38796	1.31574	1.90319	0.839102	2.46921	1.06354	5.05098	1.37491	3.51877	1.71676	3.14168	1.33958
73	4.33619	1.27589	1.94231	0.851012	2.57722	1.12857	4.93795	1.3574	3.37981	1.60767	3.27906	1.37479
74	4.25749	1.22118	1.99395	0.865548	2.66822	1.1844	4.77106	1.32171	3.28449	1.50486	3.40565	1.41187
75	4.15684	1.15702	2.05745	0.882235	2.73341	1.2247	4.56174	1.27126	3.22878	1.41089	3.52146	1.44927
76	4.04205	1.09237	2.13534	0.901467	2.76902	1.24794	4.32601	1.21051	3.20477	1.32702	3.62474	1.48512
77	3.92326	1.03772	2.23171	0.923676	2.77678	1.2561	4.08248	1.14514	3.20205	1.25358	3.71175	1.5176
78	3.81178	1.00257	2.35007	0.948904	2.76339	1.25332	3.85005	1.08213	3.20936	1.19046	3.77701	1.54478
79	3.7187	0.992853	2.49123	0.976815	2.73925	1.24468	3.6458	1.02904	3.21637	1.13747	3.81405	1.56442
80	3.65337	1.00969	2.65205	1.00685	2.7167	1.23514	3.48329	0.992293	3.21516	1.09442	3.81642	1.57397
81	3.62214	1.05022	2.8252	1.03826	2.70817	1.22892	3.37161	0.97499	3.20142	1.06109	3.77891	1.57084
82	3.62759	1.10985	3.00028	1.07005	2.72451	1.22929	3.31503	0.975937	3.175	1.0371	3.69873	1.55287
83	3.66845	1.18389	3.16571	1.10089	2.77379	1.23866	3.31306	0.990915	3.13981	1.02197	3.57634	1.51881
84	3.74021	1.26794	3.31102	1.12942	2.86068	1.25856	3.36089	1.01525	3.10303	1.01542	3.41592	1.46876
85	3.83633	1.35737	3.4289	1.15487	2.9864	1.28937	3.4499	1.04551	3.07378	1.0177	3.22536	1.40435
86	3.94995	1.44675	3.51656	1.17781	3.14933	1.32967	3.56837	1.07928	3.06137	1.02972	3.01577	1.32883
87	4.07566	1.52977	3.57628	1.2008	3.34611	1.37615	3.70252	1.11347	3.07351	1.05248	2.80056	1.24688
88	4.21128	1.59997	3.61522	1.22842	3.57307	1.42447	3.83785	1.14291	3.11473	1.08644	2.59437	1.16426
89	4.35917	1.65184	3.64472	1.26665	3.82789	1.47102	3.96093	1.16023	3.1853	1.13077	2.4118	1.08726
90	4.52691	1.68233	3.67946	1.32149	4.11108	1.51508	4.06152	1.15734	3.28096	1.18321	2.26626	1.02196
91	4.72692	1.69266	3.73661	1.39745	4.42683	1.5602	4.13445	1.12779	3.39329	1.24021	2.16921	0.973385
92	4.97504	1.69022	3.83495	1.49668	4.78317	1.61388	4.18117	1.06912	3.51089	1.29735	2.12968	0.944343
93	5.28782	1.69004	3.99376	1.61926	5.1908	1.68522	4.21026	0.985047	3.62093	1.34989	2.15457	0.934526
94	5.67902	1.71396	4.23142	1.76421	5.66064	1.78121	4.23676	0.887688	3.71084	1.39329	2.2495	0.940295
95	6.15585	1.78501	4.56354	1.93059	6.20053	1.9037	4.28046	0.800188	3.76983	1.42383	2.42025	0.955715
96	6.71549	1.91737	5.00083	2.11794	6.81142	2.04898	4.36323	0.757085	3.79011	1.43915	2.6744	0.974696
97	7.34305	2.10826	5.54713	2.32593	7.4841	2.20982	4.50614	0.792199	3.76767	1.4386	3.02282	0.993641
98	8.01139	2.33876	6.19815	2.55363	8.19734	2.3785	4.72669	0.91467	3.70277	1.42345	3.48045	1.01375
99	8.68322	2.58142	6.94133	2.79871	8.91825	2.54909	5.03678	1.10712	3.59999	1.39694	4.06588	1.04187
100	9.31539	2.80844	7.75719	3.05711	9.60516	2.71801	5.44149	1.34648	3.46811	1.36414	4.7996	1.0885
101	9.8647	2.99709	8.62206	3.32331	10.2128	2.88315	5.9388	1.61478	3.31954	1.33181	5.70096	1.16238
102	10.2942	3.13259	9.51169	3.59106	10.6988	3.04186	6.52002	1.89848	3.1694	1.30793	6.78443	1.26456
103	10.5787	3.20921	10.4049	3.85432	11.0303	3.18916	7.1707	2.18589	3.03425	1.30084	8.05574	1.38634
104	10.7086	3.22974	11.2863	4.1079	11.1894	3.31718	7.87203	2.4658	2.9306	1.31786	9.50872	1.51251
105	10.6907	3.20379	12.1482	4.3476	11.1757	3.41631	8.60255	2.72741	2.87347	1.3637	11.1234	1.62663
106	10.5468	3.14514	12.9898	4.56989	11.0065	3.47771	9.34009	2.96124	2.87518	1.43949	12.8656	1.71546
107	10.3091	3.06869	13.8153	4.7714	10.7135	3.49622	10.0639	3.16039	2.94462	1.54303	14.6879	1.77162
108	10.0147	2.9878	14.6314	4.94881	10.3378	3.47242	10.7567	3.32178	3.08696	1.67018	16.5318	1.79478
109	9.70013	2.91255	15.4434	5.09954	9.9239	3.41344	11.4057	3.44685	3.30366	1.81645	18.3307	1.79173
110	9.39594	2.84961	16.2521	5.22289	9.51416	3.33197	12.0032	3.54117	3.59255	1.97808	20.0136	1.77574
111	9.12395	2.80341	17.0521	5.32136	9.14413	3.24393	12.5452	3.61282	3.94789	2.1522	21.5094	1.76504
112	8.89613	2.77783	17.8301	5.40095	8.84001	3.16527	13.0298	3.66994	4.36024	2.33611	22.752	1.77996
113	8.71548	2.7771	18.5653	5.47008	8.61762	3.10876	13.4541	3.7183	4.8164	2.52601	23.6859	1.83783
114	8.57831	2.80508	19.2308	5.53701	8.48253	3.08181	13.8124	3.76011	5.29954	2.71579	24.2725	1.94714
115	8.47709	2.86296	19.796	5.60678	8.43107	3.08584	14.0947	3.79445	5.78985	2.89641	24.4948	2.10403
116	8.40319	2.94682	20.2304	5.67906	8.45152	3.11709	14.2873	3.81917	6.26565	3.05626	24.3608	2.29394
117	8.34889	3.04672	20.507	5.74804	8.52561	3.16807	14.3757	3.83283	6.70509	3.18261	23.9039	2.49659
118	8.3085	3.14818	20.6074	5.80446	8.63018	3.22899	14.3477	3.83572	7.08795	3.26376	23.1792	2.69129
119	8.27855	3.23547	20.5247	5.83894	8.73944	3.28879	14.1978	3.8296	7.39722	3.2915	22.2571	2.86087
120	8.25709	3.29534	20.2662	5.84511	8.82776	3.33619	13.9304	3.81654	7.62029	3.26307	21.2141	2.99407
121	8.24264	3.3198	19.8537	5.82165	8.87289	3.36081	13.5614	3.79788	7.7495	3.18219	20.1227	3.08637
122	8.23293	3.30741	19.3213	5.77268	8.85915	3.35447	13.1173	3.77398	7.78223	3.05868	19.0436	3.13941
123	8.22388	3.26298	18.7116	5.70672	8.77995	3.31247	12.6326	3.74493	7.72065	2.90663	18.0196	3.15911
124	8.20913	3.19575	18.0697	5.63459	8.63889	3.23444	12.1452	3.71181	7.57143	2.74156	17.074	3.1531
125	8.18026	3.11675	17.438	5.56682	8.44909	3.12472	11.6914	3.67749	7.34533	2.57727	16.2126	3.12818
126	8.12781	3.03604	16.8506	5.51137	8.23058	2.99191	11.3006	3.64648	7.05684	2.42316	15.4288	3.08861
127	8.04303	2.96067	16.3301	5.47203	8.00638	2.848	10.992	3.62374	6.72339	2.28304	14.7093	3.03575
128	7.91993	2.89396	15.8862	5.448	7.79792	2.7069	10.7725	3.61262	6.36424	2.1558	14.0406	2.96909
129	7.75721	2.83621	15.517	5.43461	7.6209	2.58249	10.6365	3.61314	5.99891	2.03738	13.4136	2.88818
130	7.5596	2.78612	15.2112	5.42496	7.4825	2.48638	10.5673	3.62104	5.64544	1.92342	12.8256	2.79466
131	7.33817	2.74233	14.9521	5.41184	7.38043	2.4255	10.5403	3.62832	5.31876	1.81134	12.2805	2.69364
132	7.10945	2.70434	14.7212	5.38963	7.30397	2.40042	10.5265	3.62477	5.02972	1.70157	11.7863	2.59404
133	6.89338	2.67265	14.5017	5.3555	7.23663	2.40528	10.496	3.6002	4.78484	1.59776	11.3524	2.50747
134	6.71049	2.64842	14.2802	5.30991	7.15967	2.42955	10.4219	3.54648	4.58691	1.50609	10.9859	2.44566
135	6.5788	2.63279	14.0487	5.25637	7.05578	2.46069	10.2835	3.4592	4.436	1.43373	10.6894	2.41719
136	6.51097	2.62637	13.8046	5.2007	6.91213	2.48677	10.0683	3.33848	4.33064	1.38707	10.4597	2.42487
137	6.51216	2.62886	13.5501	5.15002	6.72228	2.4982	9.77409	3.18898	4.26857	1.37044	10.288	2.46529
138	6.579	2.63893	13.2916	5.11144	6.48677	2.4886	9.40887	3.01897	4.24697	1.38586	10.1614	2.53061
139	6.69979	2.65424	13.0384	5.09075	6.21241	2.45488	8.99015	2.83868	4.26205	1.43346	10.0648	2.61128
140	6.85598	2.67157	12.801	5.09123	5.91064	2.39697	8.54291	2.65831	4.30834	1.51144	9.98316	2.698
141	7.02464	2.68717	12.5903	5.11302	5.59543	2.31711	8.09645	2.48622	4.37796	1.61503	9.90302	2.78265
142	7.18172	2.69728	12.4158	5.15319	5.28102	2.21906	7.68051	2.32774	4.46037	1.73553	9.81369	2.8584
143	7.30546	2.69878	12.2844	5.20652	4.98021	2.10731	7.32133	2.18503	4.54263	1.86064	9.70773	2.91971
144	7.37947	2.68977	12.1994	5.2665	4.70317	1.98645	7.03817	2.05798	4.61052	1.97645	9.58097	2.96239
145	7.39488	2.66982	12.1598	5.32611	4.45703	1.8608	6.84095	1.94556	4.65014	2.07011	9.43244	2.98362
146	7.35117	2.63993	12.1593	5.37805	4.24603	1.73445	6.72935	1.84718	4.64982	2.13231	9.26395	2.98177
147	7.25539	2.60205	12.1869	5.41472	4.07208	1.61154	6.69366	1.76343	4.60189	2.15874	9.0797	2.95604
148	7.12007	2.5583	12.2267	5.4282	3.9354	1.49657	6.71708	1.69604	4.50395	2.15037	8.88562	2.90647
149	6.96015	2.5102	12.2603	5.41074	3.83502	1.39438	6.77912	1.64723	4.35932	2.11269	8.68852	2.83441
150	6.78967	2.45807	12.2683	5.35591	3.76907	1.30952	6.85922	1.61874	4.17666	2.05412	8.49504	2.74339
151	6.61883	2.40076	12.2337	5.26026	3.73474	1.24495	6.94013	1.61102	3.96868	1.98416	8.31064	2.63965
152	6.4522	2.33591	12.1443	5.12505	3.72819	1.20072	7.01009	1.62291	3.75032	1.91146	8.13873	2.53167
153	6.2882	2.26065	11.9953	4.95746	3.7444	1.17354	7.0636	1.65197	3.53664	1.84249	7.98019	2.42819
154	6.12006	2.17243	11.7895	4.77042	3.77726	1.15792	7.10065	1.69502	3.34084	1.7809	7.83345	2.33563
155	5.93788	2.06989	11.5369	4.58074	3.82005	1.14818	7.12464	1.74874	3.17266	1.72773	7.69502	2.25592
156	5.7314	1.95335	11.2525	4.40565	3.86616	1.14027	7.13978	1.80982	3.03743	1.68218	7.56046	2.18631
157	5.49275	1.82495	10.9537	4.25852	3.90999	1.13242	7.14861	1.87496	2.93567	1.64249	7.42552	2.12117
158	5.21888	1.68842	10.6572	4.14583	3.9479	1.12492	7.15039	1.94073	2.86346	1.60663	7.28719	2.0548
159	4.91277	1.54863	10.3769	4.06668	3.97871	1.11938	7.14086	2.00364	2.81327	1.57248	7.14437	1.98368
160	4.58371	1.41133	10.123	4.01534	4.00363	1.11837	7.11343	2.06026	2.77524	1.53785	6.99818	1.90756
161	4.246	1.283	9.90114	3.98503	4.02563	1.12536	7.06141	2.10747	2.73884	1.50029	6.85164	1.82924
162	3.91698	1.17094	9.71342	3.97088	4.04819	1.14458	6.98067	2.14269	2.69456	1.45723	6.70896	1.75353
163	3.61406	1.08264	9.55859	3.97061	4.07395	1.17983	6.87185	2.16417	2.63557	1.40625	6.57444	1.68575
164	3.35218	1.02422	9.43314	3.98325	4.10357	1.23242	6.74144	2.17153	2.55905	1.3458	6.45143	1.63002
165	3.14136	0.997503	9.33199	4.00706	4.13515	1.29931	6.60122	2.16646	2.46681	1.27588	6.34139	1.58784
166	2.9856	0.998058	9.24936	4.03833	4.16443	1.37302	6.46629	2.15329	2.36521	1.19866	6.24341	1.55766
167	2.88269	1.01596	9.17957	4.07154	4.18565	1.44335	6.3519	2.13904	2.26423	1.11879	6.15427	1.53561
168	2.82534	1.03909	9.11791	4.10086	4.19285	1.49982	6.27016	2.13253	2.17581	1.04316	6.06911	1.51727
169	2.80304	1.05662	9.0613	4.12182	4.18121	1.5338	6.22734	2.1423	2.11183	0.979946	5.98241	1.49946
170	2.80446	1.06106	9.00861	4.13226	4.14801	1.53975	6.22256	2.174	2.08196	0.936862	5.88922	1.48128
171	2.81968	1.0491	8.96042	4.13207	4.09315	1.5157	6.24831	2.22812	2.09188	0.918716	5.78619	1.46398
172	2.84183	1.02172	8.91834	4.12206	4.01921	1.46317	6.29248	2.29953	2.14208	0.92552	5.67229	1.44972
173	2.86797	0.984042	8.88385	4.10257	3.93093	1.38687	6.34161	2.37902	2.22746	0.952408	5.54878	1.43985
174	2.89876	0.944711	8.85722	4.07262	3.83465	1.29423	6.38427	2.45598	2.3378	0.991426	5.41891	1.43379
175	2.93736	0.914591	8.83663	4.03006	3.73747	1.19473	6.41406	2.52122	2.45907	1.03378	5.28693	1.42889
176	2.98762	0.904087	8.81785	3.97247	3.64659	1.09894	6.43117	2.56879	2.57516	1.07137	5.15728	1.42129
177	3.05215	0.919363	8.79461	3.89822	3.56856	1.01706	6.44242	2.59662	2.67013	1.09745	5.03371	1.40728
178	3.13078	0.959589	8.75965	3.80737	3.50872	0.957083	6.45967	2.60594	2.73028	1.10696	4.91893	1.38453
179	3.21988	1.01751	8.70619	3.70185	3.47066	0.923363	6.49687	2.59992	2.74589	1.09651	4.81475	1.35295
180	3.31274	1.08282	8.62961	3.58524	3.4558	0.916599	6.56654	2.58225	2.71242	1.06452	4.72248	1.3152
181	3.40095	1.14565	8.52888	3.46239	3.46328	0.935229	6.67629	2.55613	2.6309	1.01115	4.64366	1.27673
182	3.47649	1.19883	8.40747	3.33896	3.48994	0.976756	6.82626	2.52397	2.50762	0.938393	4.58045	1.24522
183	3.53376	1.2387	8.27339	3.22111	3.5308	1.03774	7.00785	2.48739	2.35322	0.850222	4.53574	1.22935
184	3.57105	1.26505	8.13813	3.11512	3.57959	1.11296	7.20433	2.44725	2.18115	0.753071	4.5125	1.23675
185	3.59084	1.28025	8.01469	3.02683	3.62967	1.19507	7.39292	2.40352	2.00606	0.656842	4.51278	1.27171
186	3.59885	1.28809	7.91486	2.96065	3.67485	1.27563	7.54838	2.35509	1.84201	0.576114	4.53634	1.33345
187	3.60211	1.29239	7.84637	2.91829	3.71009	1.34675	7.64706	2.30003	1.7009	0.529312	4.57958	1.41574
188	3.60653	1.2961	7.8105	2.89743	3.73186	1.40278	7.67097	2.23644	1.59128	0.530491	4.635	1.50804
189	3.61493	1.30087	7.8008	2.89097	3.73817	1.44111	7.61092	2.16367	1.51765	0.57718	4.6916	1.59752
190	3.626	1.30709	7.80329	2.88756	3.72808	1.46214	7.46818	2.08308	1.48043	0.652059	4.73627	1.67138
191	3.63466	1.31405	7.79837	2.87343	3.70118	1.46847	7.25449	1.99813	1.47646	0.735889	4.75585	1.71908
192	3.63374	1.32008	7.76393	2.83536	3.65705	1.46372	6.99019	1.91353	1.50008	0.814636	4.73965	1.73455
193	3.61628	1.32274	7.67936	2.76359	3.5951	1.45145	6.70117	1.83403	1.54444	0.880053	4.68174	1.71786
194	3.5779	1.31944	7.52936	2.65428	3.51495	1.43443	6.41491	1.76356	1.60285	0.92878	4.58247	1.67623
195	3.51845	1.3083	7.30712	2.51064	3.41719	1.41459	6.15664	1.70496	1.66983	0.961481	4.44915	1.62374
196	3.44232	1.28914	7.01581	2.34271	3.30428	1.39334	5.94602	1.66011	1.74179	0.982012	4.2953	1.57885
197	3.3576	1.2642	6.6686	2.16564	3.18132	1.37231	5.79515	1.62987	1.81698	0.996203	4.13893	1.55904
198	3.27416	1.23808	6.28661	1.99676	3.05603	1.35385	5.70779	1.61369	1.89503	1.01017	3.9998	1.57394
199	3.20156	1.21667	5.89579	1.85216	2.93806	1.34117	5.68009	1.60907	1.97601	1.0284	3.89629	1.62133
200	3.14727	1.20516	5.52259	1.74349	2.83735	1.33782	5.70206	1.61176	2.05943	1.05247	3.84232	1.68954
201	3.11566	1.20591	5.19002	1.67656	2.76219	1.34671	5.7598	1.61654	2.14342	1.08079	3.84476	1.76418
202	3.108	1.21743	4.91404	1.65193	2.71725	1.36895	5.83756	1.61831	2.22446	1.10962	3.902	1.83424
203	3.12325	1.23507	4.70158	1.66657	2.70238	1.40302	5.91961	1.61301	2.2976	1.13439	4.00374	1.8946
204	3.1591	1.25298	4.55009	1.71495	2.71231	1.44462	5.99162	1.59801	2.35744	1.15084	4.13229	1.94543
205	3.21294	1.26619	4.44876	1.78925	2.73754	1.48752	6.04156	1.57238	2.39939	1.15576	4.26513	1.9893
206	3.28234	1.27168	4.38117	1.8796	2.76608	1.5249	6.06017	1.53697	2.421	1.14744	4.37831	2.0278
207	3.365	1.26863	4.32859	1.97494	2.78563	1.55079	6.04138	1.49434	2.42303	1.1261	4.45011	2.05898
208	3.45822	1.258	4.27322	2.06443	2.78568	1.56124	5.98258	1.44833	2.40988	1.09414	4.46425	2.07707
209	3.55829	1.24202	4.20094	2.13868	2.75903	1.55463	5.8849	1.40308	2.3893	1.05606	4.4121	2.07411
210	3.65989	1.22377	4.10287	2.19035	2.70259	1.53142	5.75338	1.36177	2.37152	1.01799	4.29348	2.04268
211	3.75598	1.20665	3.97584	2.21447	2.6174	1.49324	5.59682	1.32582	2.3678	0.986594	4.11599	1.97829
212	3.83808	1.19354	3.82173	2.20829	2.50804	1.442	5.42736	1.29517	2.38891	0.967664	3.89315	1.88078
213	3.897	1.18553	3.64605	2.17131	2.38161	1.3793	5.25926	1.27	2.44358	0.964695	3.64186	1.75466
214	3.92384	1.18082	3.45616	2.10515	2.24662	1.30643	5.1074	1.25313	2.53728	0.978121	3.37982	1.60877
215	3.91119	1.17473	3.25949	2.01325	2.11175	1.22486	4.98532	1.25154	2.67144	1.00568	3.12319	1.45554
216	3.85432	1.16097	3.06219	1.90052	1.98478	1.13689	4.90338	1.27565	2.84298	1.04381	2.88524	1.30999
217	3.75223	1.13377	2.86828	1.77255	1.87164	1.04617	4.86728	1.33531	3.04448	1.0893	2.67559	1.18789
218	3.60843	1.08998	2.67949	1.63499	1.77577	0.957759	4.87753	1.4343	3.26479	1.14029	2.50032	1.10235
219	3.43125	1.03019	2.49574	1.49296	1.69788	0.87746	4.92966	1.56752	3.49019	1.19609	2.36255	1.05889
220	3.23381	0.958778	2.31609	1.3509	1.6363	0.810603	5.01543	1.72271	3.70586	1.25595	2.26322	1.05255
221	3.03322	0.882852	2.13984	1.21254	1.58777	0.760348	5.12451	1.88468	3.89771	1.31767	2.20191	1.07053
222	2.84948	0.810567	1.9677	1.08123	1.54861	0.726489	5.24632	2.03898	4.05397	1.37694	2.17755	1.09872
223	2.7037	0.749473	1.80247	0.960116	1.516	0.70564	5.3716	2.17422	4.16659	1.42814	2.18883	1.12681
224	2.61614	0.705975	1.64928	0.852319	1.4889	0.693006	5.49344	2.28305	4.23186	1.46599	2.2343	1.15016
225	2.60403	0.686354	1.51529	0.760916	1.46847	0.68463	5.60777	2.36247	4.25046	1.4873	2.31218	1.16912
226	2.67958	0.698313	1.40879	0.688701	1.45779	0.678978	5.71324	2.4136	4.22667	1.49203	2.41987	1.18726
227	2.84829	0.750237	1.33802	0.637719	1.46093	0.677325	5.81075	2.44103	4.16728	1.48335	2.55342	1.20913
228	3.10796	0.847256	1.30994	0.608876	1.48176	0.682969	5.90269	2.45172	4.08026	1.46657	2.70697	1.2383
229	3.44852	0.987759	1.329	0.601883	1.52285	0.699465	5.99206	2.45353	3.97366	1.44741	2.87259	1.27602
230	3.85294	1.16381	1.39626	0.615521	1.58481	0.728587	6.08152	2.45367	3.85476	1.43014	3.04057	1.32099
231	4.29881	1.36384	1.50894	0.647716	1.66617	0.769157	6.17245	2.45718	3.72987	1.41657	3.2002	1.36999
232	4.76102	1.57511	1.66046	0.695167	1.76408	0.817623	6.26436	2.46604	3.60426	1.40619	3.34111	1.41899
233	5.2144	1.78523	1.84094	0.752973	1.8752	0.870047	6.35451	2.47885	3.4826	1.3976	3.45475	1.46435
234	5.63663	1.98324	2.0383	0.814921	1.9968	0.924492	6.43825	2.49111	3.36925	1.38989	3.53575	1.50395
235	6.01028	2.1602	2.23966	0.874463	2.12754	0.982767	6.50976	2.49618	3.26858	1.38352	3.58282	1.5378
236	6.32433	2.30975	2.43302	0.926073	2.26771	1.05084	6.5633	2.48646	3.18499	1.38	3.59879	1.56812
237	6.57424	2.42822	2.60876	0.966412	2.41888	1.13725	6.59458	2.45494	3.12269	1.38091	3.58978	1.59826
238	6.76145	2.51456	2.76075	0.994997	2.58314	1.24978	6.60191	2.39686	3.08521	1.3869	3.56358	1.63105
239	6.89176	2.5698	2.88678	1.01413	2.76201	1.39186	6.58693	2.31126	3.07471	1.39747	3.5277	1.66701
240	6.97351	2.59642	2.98814	1.02817	2.95546	1.56098	6.55467	2.20218	3.0914	1.41133	3.48754	1.7035
241	7.01564	2.59764	3.06851	1.04237	3.16112	1.74945	6.51299	2.07908	3.13313	1.42718	3.44512	1.73518
242	7.02606	2.57683	3.13241	1.06161	3.37415	1.94662	6.47154	1.95577	3.19552	1.4442	3.39888	1.75562
243	7.01062	2.53717	3.18366	1.0892	3.58731	2.14092	6.44055	1.84786	3.27262	1.46211	3.34445	1.75894
244	6.97281	2.48157	3.22432	1.12598	3.79186	2.32135	6.42961	1.76839	3.35814	1.48118	3.27618	1.74123
245	6.9143	2.4128	3.25437	1.16974	3.97849	2.47816	6.44675	1.72369	3.44678	1.50214	3.1891	1.70114
246	6.836	2.33365	3.27233	1.21554	4.13868	2.60343	6.49781	1.71161	3.53556	1.52645	3.08062	1.64007
247	6.73946	2.2472	3.27643	1.25691	4.26589	2.69125	6.58611	1.72397	3.62436	1.55635	2.95168	1.5619
248	6.62812	2.15693	3.26623	1.28803	4.35673	2.73817	6.71244	1.75101	3.71579	1.59485	2.80703	1.47244
249	6.50795	2.06686	3.24386	1.30584	4.41154	2.74335	6.87512	1.78493	3.81406	1.64499	2.65468	1.37867
250	6.38723	1.98139	3.21462	1.31158	4.43446	2.70888	7.07036	1.82091	3.92349	1.7089	2.50463	1.28791
251	6.27561	1.90488	3.1866	1.31098	4.43291	2.63973	7.29259	1.85634	4.04685	1.78652	2.36736	1.20695
252	6.18249	1.8409	3.16925	1.3128	4.41629	2.54339	7.53491	1.88975	4.18428	1.87492	2.25221	1.14131
253	6.11542	1.7914	3.17142	1.32596	4.39445	2.42926	7.78929	1.92019	4.33281	1.96836	2.16618	1.09462
254	6.07911	1.75594	3.19909	1.35649	4.37605	2.30755	8.04673	1.94723	4.48694	2.05961	2.11309	1.06827
255	6.07514	1.73172	3.25373	1.40555	4.36721	2.18807	8.29717	1.97114	4.63963	2.14192	2.09335	1.06131
256	6.10273	1.71432	3.33152	1.46979	4.37084	2.07903	8.52919	1.99264	4.78361	2.21093	2.10422	1.07083
257	6.16013	1.69914	3.42387	1.54306	4.38654	1.98593	8.72999	2.01235	4.91258	2.26596	2.1405	1.09272
258	6.24603	1.68308	3.5191	1.61848	4.41122	1.9112	8.88569	2.03022	5.0218	2.30989	2.19546	1.12245
259	6.36067	1.66601	3.60489	1.68982	4.43993	1.85422	8.9825	2.04545	5.1084	2.34769	2.26194	1.15562
260	6.50586	1.65155	3.67104	1.75235	4.46675	1.8121	9.00845	2.05702	5.17111	2.38403	2.33333	1.18804
261	6.68414	1.64685	3.71174	1.8034	4.48543	1.78057	8.95575	2.06438	5.20998	2.42107	2.40452	1.21586
262	6.89705	1.66082	3.72696	1.84252	4.48983	1.75485	8.82298	2.06793	5.22593	2.45733	2.47234	1.23581
263	7.14318	1.70077	3.7225	1.87143	4.47412	1.73025	8.61653	2.06915	5.22051	2.48824	2.53573	1.24582
264	7.41651	1.76888	3.70879	1.89342	4.43301	1.70253	8.35079	2.07026	5.19561	2.50771	2.59538	1.24579
265	7.70578	1.8604	3.69867	1.91258	4.36211	1.66819	8.04653	2.07378	5.15331	2.51011	2.65302	1.23807
266	7.99504	1.9652	3.70463	1.93274	4.25862	1.62486	7.72795	2.08198	5.09547	2.49178	2.71052	1.22712
267	8.26563	2.07143	3.73623	1.95667	4.12204	1.57163	7.41868	2.09613	5.02346	2.45191	2.76896	1.2185
268	8.49887	2.16925	3.79806	1.98521	3.95491	1.50941	7.13797	2.11562	4.93782	2.39282	2.82815	1.21707
269	8.67927	2.2531	3.88903	2.01677	3.7632	1.44108	6.89769	2.13713	4.83819	2.31939	2.88653	1.22549
270	8.797	2.32214	4.00266	2.04726	3.5563	1.37125	6.70114	2.15452	4.72368	2.23798	2.94171	1.24372
271	8.84953	2.37907	4.12885	2.07077	3.34629	1.30568	6.54369	2.15969	4.59351	2.15486	2.99138	1.26954
272	8.84162	2.42811	4.25611	2.08106	3.14694	1.25039	6.41518	2.14454	4.44805	2.07464	3.03427	1.29982
273	8.78403	2.47326	4.37427	2.07363	2.97222	1.21064	6.30303	2.10333	4.28976	1.9994	3.07094	1.33155
274	8.69119	2.51739	4.47654	2.04769	2.83482	1.19018	6.19546	2.03468	4.12389	1.92898	3.10379	1.36234
275	8.57842	2.56223	4.56078	2.00733	2.7448	1.19092	6.08371	1.94243	3.95856	1.86227	3.13655	1.39066
276	8.45949	2.60846	4.62944	1.96139	2.70857	1.21317	5.96298	1.83523	3.80413	1.79877	3.173	1.41581
277	8.34472	2.65548	4.68833	1.9215	2.72825	1.25621	5.83212	1.72482	3.67182	1.73943	3.21553	1.43783
278	8.24016	2.70066	4.74448	1.89853	2.80152	1.31861	5.69234	1.62344	3.57199	1.68656	3.26387	1.45714
279	8.14748	2.73887	4.80376	1.89828	2.92183	1.39824	5.54579	1.54109	3.51223	1.64266	3.31453	1.47409
280	8.06454	2.76305	4.86897	1.91868	3.07897	1.49192	5.39425	1.48331	3.49581	1.60911	3.36109	1.48843
281	7.98637	2.76579	4.93887	1.95034	3.25997	1.59507	5.23862	1.45029	3.52074	1.58519	3.39541	1.49911
282	7.90612	2.74151	5.00846	1.98029	3.45024	1.70159	5.07881	1.43747	3.57968	1.56796	3.4094	1.50453
283	7.81615	2.68821	5.07048	1.99687	3.63479	1.80411	4.91438	1.43712	3.66076	1.55285	3.39685	1.50318
284	7.70897	2.6083	5.11756	1.9939	3.79971	1.89468	4.74525	1.44049	3.74922	1.53464	3.35477	1.49425
285	7.5782	2.50819	5.14442	1.97288	3.93335	1.96566	4.5726	1.43978	3.82953	1.50853	3.28397	1.478
286	7.41929	2.3968	5.14939	1.94279	4.02761	2.01082	4.39966	1.43012	3.88776	1.47097	3.18864	1.45559
287	7.23019	2.28343	5.13493	1.9172	4.07866	2.02633	4.23221	1.41118	3.91364	1.42012	3.07538	1.42874
288	7.01159	2.17544	5.10694	1.90916	4.08742	2.01168	4.07875	1.38803	3.90207	1.35602	2.95182	1.39918
289	6.76698	2.07664	5.07323	1.92582	4.05935	1.97015	3.95005	1.37073	3.85368	1.28043	2.82553	1.36836
290	6.50235	1.98682	5.04164	1.96603	4.00376	1.90883	3.85804	1.3717	3.77446	1.19652	2.70325	1.33738
291	6.22575	1.90281	5.01834	2.0223	3.93252	1.83799	3.81403	1.40102	3.67443	1.10859	2.59061	1.30714
292	5.94673	1.82033	5.00678	2.08524	3.8584	1.76946	3.82654	1.46168	3.56567	1.02182	2.49217	1.27856
293	5.67579	1.73605	5.00738	2.14724	3.79319	1.7142	3.89916	1.54786	3.46014	0.942056	2.41142	1.25269
294	5.42369	1.64879	5.01797	2.20369	3.74589	1.67933	4.02911	1.64753	3.36763	0.875335	2.35073	1.23061
295	5.20085	1.55975	5.0346	2.25226	3.72127	1.66601	4.20687	1.74677	3.29446	0.827084	2.31097	1.2131
296	5.01646	1.47174	5.05258	2.29163	3.71902	1.66931	4.4174	1.83344	3.2429	0.800838	2.29125	1.20021
297	4.87754	1.38797	5.06735	2.32078	3.73368	1.6802	4.64255	1.89928	3.21158	0.797059	2.28867	1.19093
298	4.78789	1.31079	5.0751	2.33919	3.75544	1.68843	4.86452	1.94087	3.19653	0.812803	2.29861	1.18313
299	4.74729	1.24118	5.07307	2.34744	3.77161	1.68492	5.06935	1.95962	3.19276	0.842683	2.31535	1.17397
300	4.75103	1.17906	5.05959	2.34763	3.76874	1.66316	5.24971	1.96103	3.19567	0.880579	2.33315	1.16046
301	4.79017	1.12436	5.03399	2.34282	3.73498	1.61966	5.40616	1.95323	3.20213	0.921252	2.34736	1.14008
