# Supplementary material for: Hierarchical architecture of dopaminergic circuits enables second-order conditioning in Drosophila
Source: eLife journal article supplement (doi:10.7554/elife.79042), 2023-01-24
Supplement: fig5-data1 [file Figure_5D.xlsx]

## Sheet: Sheet1
	OCT			MCH
	Pre	Post1	Post2	Pre	Post1	Post2
Mean	1.91667	9.80462	3.44476	4.43524	1.0041	7.15714
SEM	0.995803	3.23985	1.15078	1.48063	0.441787	0.800434
Fly1	4.84	16.52	8.2	7.68	2.12	7.96
Fly2	4.6	7.28	3.36	7.2	0.6	6.88
Fly3	-0.0285714	2.96	0.6	1.85714	0.36	5.72
Fly4	0.62	4.70769	4.92	8.16	1.58462	5.84
Fly5	2.42857	22.64	2.62857	1.71429	2	10.7429
Fly6	-0.96	4.72	0.96	2.22045e-16	-0.64	5.8
