# Supplementary material for: Hierarchical architecture of dopaminergic circuits enables second-order conditioning in Drosophila
Source: eLife. 2023 Jan 24;12:e79042. doi: 10.7554/eLife.79042 (PMC9937650; doi:10.7554/eLife.79042)
Supplement: Figure 1—figure supplement 1—source data 1. [file elife-79042-fig1-figsupp1-data1.xlsx]

## Sheet: Figure1-figure supplement1
Odor	test	Naive Fed								Naive 48H Starvation
PA	1	-0.192527	-0.200828	-0.123007	-0.262943	-0.110958	-0.167052	-0.00173	-0.0322177	-0.188958	-0.125651	0.141145	-0.0360818	0.253032	-0.0692161	0.014824	0.303194
	2	-0.144851	-0.226526	-0.120092	0.0146984	-0.130388	0.229794	-0.265391	-0.120592	-0.154121	-0.0102493	-0.278128	-0.126175	-0.164767	-0.136395	-0.082603	-0.150969
	3	-0.15688	-0.153244	-0.39703	-0.437325	-0.255642	-0.31004	-0.299476	-0.180772	-0.145396	-0.417464	0.090229	0.0377815	-0.357154	-0.156114	0.0287514	-0.258842
	4	-0.075029	-0.184441	-0.0621761	-0.200626	-0.29469	-0.0645787	-0.270699	-0.154098	-0.0087431	-0.148633	-0.186099	-0.160264	-0.15105	-0.202356	-0.153977	-0.118917
	5	-0.325975	-0.149308	0.0222842	-0.103313	-0.370835	-0.269048	-0.0036873	-0.0299846	-0.288943	-0.317362	-0.0849466	-0.202903	-0.147716	-0.219038	-0.069513	-0.207373
	6	-0.15409	-0.148349	-0.316332	-0.355736	-0.115221	-0.126414	-0.373052	-0.120979	-0.185544	-0.157172	-0.0280945	-0.0444614	-0.0626579	-0.270184	-0.418957	0.103218
	7	-0.178218	-0.117958	-0.247305	-0.182559	-0.301441	0.0735392	-0.0646469	-0.0989971	-0.0951465	-0.327272	-0.164817	-0.0600248	-0.137537	-0.206265	0.112856	-0.166277
	8	-0.300946	-0.14751	-0.41417	-0.276923	-0.193355	-0.10048	-0.173391	-0.044203	0.0188164	-0.179009	0.0221035	-0.0367795	-0.0110655	-0.315324	0.0373511	0.0566755
	9	-0.104863	-0.238313	0.0305983	-0.13186	-0.120201	-0.258097	-0.0695689	-0.228977	-0.0454324	0.0802626	-0.0978848	-0.116049	-0.283678	-0.29131	0.113596	-0.0574535
	10	-0.207446	0.0653194	-0.209081	-0.1739	-0.284114	-0.0755419	-0.0372025	0.0486941	-0.141883	-0.252943	-0.165244	-0.182843	-0.0145512	-0.196517	-0.218232	-0.0503316
	11	-0.258496	-0.0511283	0.112264	-0.0232176	-0.0524426	-0.0825156	-0.215677	-0.0301983	-0.111097	0.00088527	-0.174172	0.14492	-0.261355	-0.0816424	0.053367	-0.100985
	12	0.0330321	0.146914	-0.126156	-0.210381	-0.144658	0.0381445	-0.0951575	-0.0435428	-0.0060583	-0.213332	-0.0096887	-0.296649	-0.169898	-0.0029137	-0.168072	0.179231
EL	1	0.605332	0.452022	0.160809	0.240485	0.256251	0.698023	0.298645	0.545776	0.645813	0.521192	0.699486	0.238818	0.760355	0.53765	0.442039	0.591041
	2	0.207145	0.254264	0.297463	0.44114	0.222806	0.250319	0.639081	0.647075	0.500578	0.45276	0.38516	0.508239	0.518686	0.517024	0.640506	0.505417
	3	0.251833	0.135293	0.230775	0.023978	0.316497	0.331993	0.514023	0.262703	0.557834	0.398007	0.5441	0.438245	0.50184	0.214758	0.685838	0.468246
	4	0.490278	0.296988	0.198467	0.277166	0.347208	-0.0163637	0.215637	0.303716	0.56303	0.272317	0.414448	0.309506	0.237769	0.482366	0.446866	0.640412
	5	0.327728	0.152558	0.113673	-0.071079	0.20009	0.290348	0.380198	0.431216	0.568841	0.39031	0.366912	0.260197	0.463388	0.0343901	0.532255	0.168319
	6	0.239011	0.3257	0.144861	0.315145	0.284671	0.0207704	0.319675	0.369097	0.370304	0.46432	0.388274	0.387455	0.54134	0.339881	0.43198	0.377124
	7	-0.0063754	0.147785	0.108431	0.207434	0.123629	0.185237	0.0868023	0.366725	0.595216	0.208037	0.476579	0.420987	0.35626	0.344872	0.382379	0.33574
	8	0.179192	0.225112	0.136716	0.402883	0.460171	0.250931	0.279606	0.304431	0.399888	0.272571	0.547535	0.453077	0.419479	0.366583	0.367192	0.594505
	9	0.228155	0.0253526	0.206628	-0.0898016	0.287392	-0.0209722	0.0218645	0.339762	0.369043	0.193734	0.415757	0.2891	0.324312	0.192834	0.547482	0.241395
	10	0.23986	0.150457	0.181088	0.335082	-0.0050688	0.218332	0.289186	0.254714	0.148898	0.292174	0.463058	0.476792	0.146477	0.230117	0.519439	0.38892
	11	0.373732	0.125967	0.279748	0.219848	0.400636	0.0174734	0.249989	0.265661	0.513581	0.162322	0.560871	0.314699	0.236505	0.151048	0.442901	0.473103
	12	0.167248	0.379071	0.283783	0.20339	0.500506	0.325326	0.262198	0.331421	0.421573	0.415432	0.363762	0.425848	0.374984	0.430843	0.573054	0.576545
MCH	1	-0.260424	-0.387436	-0.272994	-0.130874	-0.424591	-0.204956	-0.462208	-0.526479	0.418958	-0.31646	0.429741	-0.0206262	0.709127	0.384297	0.0598277	-0.0094179
	2	-0.179672	-0.502977	-0.422097	-0.301621	-0.403965	-0.150545	-0.513685	-0.331479	-0.261586	-0.275576	-0.360318	-0.0277043	0.385387	0.0483851	0.584561	0.019799
	3	-0.141542	-0.377702	-0.263465	-0.249126	-0.51456	-0.387487	-0.384034	-0.445232	-0.0504607	-0.284659	0.167969	-0.553019	0.372245	0.17189	0.0264379	-0.211072
	4	-0.275222	-0.414128	-0.289179	-0.446685	-0.408741	-0.32263	-0.6482	-0.148387	-0.307741	-0.41258	-0.438768	-0.368566	0.0488416	-0.166407	0.241378	-0.16417
	5	-0.475113	-0.471654	-0.306242	-0.339298	-0.382302	-0.341125	-0.545243	-0.497955	-0.191155	-0.309859	0.00938233	-0.0623202	0.144961	0.00518059	-0.204214	-0.0681536
	6	-0.454267	-0.18483	-0.426074	-0.400122	-0.594639	-0.412093	-0.662902	-0.286967	-0.205404	-0.596321	-0.712834	-0.43692	-0.16678	-0.14069	0.0021615	-0.136591
	7	-0.399526	-0.382452	-0.459675	-0.467284	-0.410406	-0.286516	-0.484752	-0.428745	-0.393588	-0.398896	-0.157239	-0.45139	0.0324466	-0.222156	-0.32839	-0.0911374
	8	-0.387796	-0.326353	-0.532878	-0.498508	-0.370892	-0.253981	-0.530158	-0.525914	-0.479684	-0.4836	-0.603606	-0.400787	-0.292659	-0.321674	-0.280775	-0.268526
	9	-0.372134	-0.592149	-0.52424	-0.502956	-0.365074	-0.484198	-0.645167	-0.358314	-0.283925	-0.528693	-0.295543	-0.389355	-0.205681	0.0286493	-0.418727	-0.0319103
	10	-0.069507	-0.400518	-0.521134	-0.665084	-0.21625	-0.0596932	-0.735636	-0.471973	-0.427242	-0.503399	-0.568047	-0.351853	-0.562833	-0.405055	-0.243345	-0.296586
	11	-0.350087	-0.489973	-0.60992	-0.54326	-0.369559	-0.534383	-0.723627	-0.253295	-0.398967	-0.447545	-0.234197	-0.497594	-0.216935	-0.37903	-0.50449	-0.172625
	12	-0.503404	-0.349951	-0.444259	-0.432028	-0.496916	-0.195747	-0.757235	-0.331292	-0.184742	-0.503242	-0.330448	-0.581213	-0.337262	-0.098215	-0.315414	-0.228975
OCT	1	-0.516449	-0.594935	-0.20964	-0.476969	-0.42083	-0.616486	-0.856824	-0.710665	-0.710051	-0.565328	-0.621012	-0.772038	-0.70018	-0.52166	-0.480705	-0.727354
	2	-0.28745	-0.533114	-0.490882	-0.406902	-0.438246	-0.353201	-0.427526	-0.569178	-0.588833	-0.546539	-0.654949	-0.675919	-0.575827	-0.640404	-0.535535	-0.524967
	3	-0.548952	-0.369939	-0.392265	-0.378047	-0.225172	-0.290206	-0.512193	-0.559463	-0.693295	-0.61177	-0.53087	-0.576183	-0.406954	-0.489228	-0.433416	-0.448788
	4	-0.371139	-0.531243	-0.435969	-0.276545	-0.395305	-0.218192	-0.377823	-0.48682	-0.65847	-0.611042	-0.558011	-0.728982	-0.530162	-0.409784	-0.374344	-0.544002
	5	-0.342322	-0.491329	-0.396021	-0.574646	-0.282155	-0.280937	-0.316717	-0.366486	-0.537625	-0.326591	-0.54623	-0.595733	-0.442311	-0.369667	-0.401814	-0.490408
	6	-0.561703	-0.529728	-0.244739	-0.340628	-0.300699	-0.29309	-0.364068	-0.0770211	-0.400714	-0.554959	-0.527079	-0.458593	-0.453387	-0.484552	-0.214442	-0.482107
	7	-0.406459	-0.290035	-0.362081	-0.586551	-0.351053	-0.346835	-0.398421	-0.301202	-0.495347	-0.505094	-0.382659	-0.566858	-0.384645	-0.289444	-0.32027	-0.45193
	8	-0.254848	-0.216523	-0.0940391	-0.234665	-0.446088	-0.280949	-0.30711	-0.304043	-0.477473	-0.329736	-0.34286	-0.246574	-0.328854	-0.561127	-0.268607	-0.278111
	9	-0.301585	-0.226213	-0.288726	-0.512636	-0.325134	-0.249848	-0.215379	-0.238048	-0.36639	-0.505443	-0.415911	-0.628392	-0.217166	-0.299989	-0.282676	-0.37947
	10	-0.168324	-0.233953	-0.249953	-0.326705	-0.511931	-0.124361	-0.412476	-0.307539	-0.468736	-0.195104	-0.433018	-0.306469	-0.308291	-0.320193	-0.310257	-0.18871
	11	-0.213498	-0.30029	-0.3399	-0.4138	-0.202435	-0.172345	-0.238156	-0.219027	-0.403009	-0.50008	-0.37743	-0.4764	-0.322602	-0.168956	-0.191209	-0.215611
	12	-0.188785	-0.294226	-0.220826	-0.283584	-0.310785	-0.0940337	-0.350133	-0.142703	-0.123393	-0.479627	-0.526109	-0.390566	-0.0853879	-0.257026	-0.0946354	-0.116561
