# Supplementary material for: Hierarchical architecture of dopaminergic circuits enables second-order conditioning in Drosophila
Source: eLife. 2023 Jan 24;12:e79042. doi: 10.7554/eLife.79042 (PMC9937650; doi:10.7554/eLife.79042)
Supplement: Figure 1—source data 1. [file elife-79042-fig1-data1.xlsx]

## Sheet: Figure1C
	1x5min unpaired																1x 2min																1x5min
1	0.167258	0.252656	0.442052	0.0339637	0.29577	0.251216	0.299108	0.18632	0.0598277	-0.0093346							0.565357	0.608807	0.553557	0.685354	0.327618	0.686592	0.561197	0.124811	0.398823	0.393917	0.701486	0.390905					0.620356	0.67725	0.834708	0.60732	0.953159	0.760422	0.711359	0.699586	0.492572	0.454384	0.5662	0.241305
2	0.127925	-0.105719	0.469935	0.370053	-0.0160402	-0.178644	0.228666	0.0043101	0.584561	0.016467							0.325696	0.402159	0.504766	0.527323	0.203661	0.532835	0.44664	0.361686	0.437547	0.315023	0.558061	0.310705					0.501606	0.437006	0.421371	0.277651	0.57723	0.608442	0.790061	0.586687	0.532622	0.407285	0.538139	0.493287
3	0.23342	0.0410975	0.0298021	0.0254511	-0.415718	-0.284187	-0.0199396	0.0889007	0.0264379	-0.211298							0.31164	0.45667	0.298868	0.52454	0.297155	0.295883	0.262011	-0.123635	0.361817	0.304203	0.372921	0.33179					0.549918	0.173972	0.684522	0.462048	0.880057	0.59966	0.672918	0.682233	0.344295	0.294373	0.55871	0.416092
4	-0.0093907	-0.154427	-0.101567	0.227575	-0.0823321	-0.102913	0.106981	-0.0252519	0.241378	-0.164709							0.105716	0.346193	0.25425	0.249829	0.296866	0.248778	0.151388	0.0585315	0.331748	-0.102592	0.354406	0.0313757					0.319168	0.196704	0.414115	0.414475	0.727802	0.179753	0.489252	0.413075	0.334379	0.19199	0.340759	0.599853
5	0.180052	-0.0559251	0.0724112	0.0511498	-0.337058	-0.138876	-0.176122	-0.313766	-0.204214	-0.0693655							-0.0692399	0.238022	-0.196546	0.215533	0.150259	0.233933	0.143869	-0.179391	0.344679	0.228926	0.495345	0.211627					0.32889	0.0826567	0.643392	0.149716	0.603546	0.268384	0.303717	0.301687	0.255676	0.161108	0.293105	0.667868
6	-0.0630162	-0.241583	0.00635386	-0.0711971	-0.0150353	-0.244631	-0.0438215	-0.167896	0.0021615	-0.134167							-0.0894815	-0.106911	0.129724	-0.0551982	0.0773373	-0.0390071	0.153379	-0.0403546	-0.096881	-0.151026	0.382101	0.147207					-0.184633	-0.168757	-0.148565	0.23523	0.243513	-0.165584	0.0947938	0.262617	-0.0927766	0.202617	0.244528	0.622045
7	0.00871759	-0.0683907	-0.160399	-0.148324	-0.287598	-0.380115	-0.450297	-0.20511	-0.32839	-0.0885058							-0.214752	0.0412741	-0.464077	-0.0407371	0.0302572	-0.120114	-0.221973	-0.22168	0.0880307	-0.0586184	0.148336	0.0203858					0.119534	-0.158569	-0.123037	0.0917131	0.363239	-0.0372021	0.233712	0.207521	-0.215185	-0.120465	0.295688	0.356679
8	-0.152027	-0.275282	-0.0929462	-0.0325553	-0.210076	-0.484519	-0.308925	-0.317358	-0.280775	-0.266695							-0.385716	0.0313514	-0.0366875	-0.0678228	-0.211279	-0.361309	-0.0831903	-0.147103	-0.0686045	-0.038654	0.209643	-0.161227					-0.138243	-0.216495	0.0256113	0.195766	0.0833613	-0.410631	0.140322	-0.272721	0.00195982	-0.0969799	0.199854	0.261783
9	-0.156119	-0.0057504	-0.178875	-0.286432	-0.240557	-0.337274	-0.27018	-0.226336	-0.418727	-0.0300471							-0.327512	0.0240237	-0.209074	-0.111179	0.0149525	-0.30123	0.0155754	-0.421647	0.144045	-0.363924	0.188685	0.0160377					-0.0442632	-0.319591	-0.139091	-0.248021	-0.099147	-0.320688	-0.165016	0.0785544	-0.0851656	-0.216229	0.172984	0.245419
10	-0.0452622	-0.242597	-0.223729	-0.232218	-0.0542476	-0.367288	-0.258797	-0.346254	-0.243345	-0.295286							-0.313785	-0.164499	-0.0549593	-0.304207	-0.246335	-0.0797462	-0.134599	-0.233037	-0.182549	-0.221015	0.0437344	-0.180503					-0.199548	-0.153278	-0.108404	0.0555844	-1.881e-05	-0.330523	-0.177506	-0.34446	-0.161899	-0.259929	-0.0521237	0.279332
11	-0.0740737	-0.212786	-0.385099	-0.19312	-0.108045	-0.0896953	-0.404414	-0.516194	-0.50449	-0.17326							-0.23791	-0.245549	-0.227984	-0.295222	-0.309807	-0.463774	-0.0724752	-0.146118	-0.0149597	-0.312574	-0.105236	-0.0356634					-0.0468013	-0.377833	-0.340403	-0.200389	-0.196676	-0.278538	-0.279471	-0.189947	-0.306336	-0.247986	-0.0883929	-0.0249565
12	-0.167191	-0.32563	-0.163247	-0.276366	-0.0637132	-0.325357	-0.402534	-0.486037	-0.315414	-0.227977							-0.378888	-0.210899	-0.111131	-0.402141	-0.190714	-0.340196	-0.0062479	-0.30544	-0.201937	-0.279371	0.0177933	-0.200028					-0.0080942	-0.265621	-0.147716	-0.0319381	-0.236267	-0.344396	-0.355155	-0.188408	-0.36045	-0.364613	0.449823	0.0669016

## Sheet: Figure1D
0min	1x2min	1x5min
0.193659	0.139721	0.287877
0.089395	0.49795	0.401162
0.172718	0.239058	0.389025
0.232286	0.311104	0.112238
0.374648	0.14022	0.463397
0.082994	0.129407	0.51369
-0.04714	0.082251	0.601136
0.031813	0.230767	0.463262
0.291802	0.535913	0.678161
0.15841	0.117392	0.520464
0.033383	0.189026	0.796116
-0.17485	0.249868	0.429417
-0.02363	0.190149	0.365323
0.365376	0.294516	0.541132
0.006647	0.369726
0.030131	0.339612

## Sheet: Figure1E
Sensory preconditioning
0.097818
-0.02727
-0.12743
0.011297
0.037848
0.013176
0.002432
-0.31256
-0.20598
0.056346
0.100891
-0.02273

## Sheet: Figure1F
immediate	1d
0.416879	0.102545
0.636412	-0.1419
0.309025	0.06129
0.395085	0.055432
0.204756	0.008276
0.335233	0.04621
0.228343	0.075911
0.319244	-0.10703
0.165251	0.147517
0.190242	0.138396
0.369631	0.034076
0.449073	0.095373

## Sheet: Figure1G_L
	1st Order																2nd order 1d
1	0.664953	0.632604	0.665189	0.764058	0.652143	0.585582											0.678161	0.520463	0.796116	0.429417	0.365323	0.541132
2	0.580542	0.525281	0.492815	0.581796	0.542241	0.588342											0.282181	0.230432	0.236215	0.162568	0.17277	0.275751
3	0.463992	0.462958	0.563371	0.603443	0.246632	0.343595											0.400817	0.0335467	0.217957	0.180344	0.0444852	0.18352
4	0.474412	0.541924	0.379526	0.634977	0.545966	0.648472											0.203956	0.241116	0.109386	-0.0167784	0.174319	0.133542
5	0.449226	0.516922	0.373812	0.47058	0.518395	0.360287											0.0853727	0.300659	0.0929293	0.045228	0.3574	0.274859
6	0.393702	0.280783	0.22333	0.391792	0.42398	0.554747											0.0736103	-0.0089719	0.0315125	0.0927336	0.0971485	0.150215

## Sheet: Figure1G_R
First	Second
0.673976	0.343971
0.682018	0.255066
0.582682	0.203469
0.794845	0.135798
0.656436	0.303256
0.721561	0.334234

## Sheet: Figure1H
Test	First order																second																second-order no-omission
0	0.0316528	0.0712998	0.0586983	-0.0891849	-0.219514	-0.151626	0.0603583	-0.0717715									-0.170442	0.0465765	0.0582081	-0.170139	-0.222378	-0.0421022	-0.0686433	0.0234461									0.250113	0.180146	0.042293	0.0311957	-0.239949	0.0454258	-0.0961673	-0.0813658
1	0.00890166	0.0015349	0.317902	0.050686	0.122779	-0.125634	0.404713	0.384171									0.241007	0.20961	0.426907	0.398088	0.268646	0.270416	0.259346	0.23046									0.56655	0.545406	0.689664	0.470548	0.463084	0.682721	0.2717	0.496316
3	0.567934	0.504157	0.696078	0.606735	0.468164	-0.0947666	0.511908	0.778624									0.285719	0.491447	0.432761	0.472343	0.508487	0.523388	0.632538	0.352343									0.866354	0.866224	0.788875	0.812487	0.557513	0.694565	0.401552	0.610659
5	0.636885	0.803547	0.754473	0.512451	0.735196	0.436656	0.623825	0.790276									0.386642	0.377036	0.448614	0.403404	0.175622	0.4925	0.288507	0.525663									0.840144	0.848639	0.743842	0.925889	0.715096	0.96569	0.606972	0.839356
7	0.621096	0.779191	0.77708	0.777474	0.648185	0.507463	0.699281	0.866181									0.59716	0.183738	0.207502	0.354668	-0.0554779	0.34597	0.49864	0.338924									0.89617	0.878437	0.916656	0.849228	0.763822	0.786454	0.969003	0.828047
9	0.471119	0.667959	0.884554	0.729067	0.694612	0.404229	0.681735	0.909681									0.0927147	0.16889	0.367301	0.37181	0.260064	0.372302	0.262744	0.494186									0.87945	0.920398	0.896982	0.722174	0.595361	0.809221	0.861416	0.756539

## Sheet: Figure1I
Test	Paired												UnPaired
0	-0.0199123	0.13659	0.0394301	-0.197171	-0.0849203	0.0281681	-0.0873536	-0.118777	-0.0844481	0.102234	-0.106521	0.056321	-0.115025	-0.000860693	0.0704422	0.188596	-0.178135	0.0593395	-0.00820007	-0.105859	0.0229466	0.0480156	0.0628128	0.0739311
1	0.146463	0.118582	0.0342316	0.234627	0.103996	-0.025428	0.0847619	0.175829	0.256838	0.166402	0.317699	0.211934	0.365706	0.219838	0.331406	0.367813	0.340019	0.27817	0.337238	0.252588	0.332831	0.479648	0.246495	0.0993265
3	0.315027	0.103477	0.0298712	0.188982	0.393423	0.227918	0.371806	0.303721	0.403167	0.445739	0.141515	0.31958	0.509702	0.480018	0.372656	0.474508	0.39218	0.380691	0.452392	0.397928	0.449341	0.502288	0.229998	0.305149
5	0.369227	0.158483	0.04575	0.416875	0.162157	0.477241	0.544088	0.185905	0.346024	0.526814	0.549677	0.410673	0.525688	0.372315	0.189003	0.566018	0.292797	0.422077	0.160734	0.453528	0.519745	0.453876	0.34428	0.268249
7	0.330828	0.10582	0.0305477	0.197908	0.238255	0.402893	0.444383	0.232163	0.301491	0.317216	0.41893	0.27917	0.428346	0.355768	0.351337	0.406885	0.346951	0.334006	0.388618	0.564896	0.467181	0.429508	0.331788	0.396772
9	0.304251	0.104138	0.030062	0.405053	0.341605	0.240276	0.400265	0.258706	0.159586	0.289104	0.264983	0.380966	0.3798	0.468347	0.327447	0.48958	0.49089	0.581449	0.146616	0.373292	0.466941	0.349032	0.423084	0.206145
