# Supplementary material for: Hierarchical architecture of dopaminergic circuits enables second-order conditioning in Drosophila
Source: eLife. 2023 Jan 24;12:e79042. doi: 10.7554/eLife.79042 (PMC9937650; doi:10.7554/eLife.79042)
Supplement: Figure 2—source data 1. [file elife-79042-fig2-data1.xlsx]

## Sheet: Figure2A
	MB043C																MB109BMB315C																MB213B (β1β2)																MB312C (γ4)
1	0.831018	0.92354	0.928382	0.829354	0.819228	0.858292	0.759855	0.764129	0.691297	0.898993							0.625413	0.867329	0.872509	0.743273	0.811502	0.842624	0.684997	0.812476									0.450476	0.446791	0.623848	0.737385	0.597319	0.623575											0.421938
2	0.782091	0.768024	0.857423	0.721865	0.775268	0.932585	0.606099	0.658483	0.7523	0.843469							0.408167	0.645223	0.531102	0.691656	0.815668	0.649844	0.74261	0.754789									0.513452	0.377227	0.405737	0.578973	0.531888	0.626763											0.0636231
3	0.623218	0.882301	0.799577	0.762896	0.841901	0.717456	0.647168	0.730862	0.672482	0.764994							0.505521	0.47596	0.544294	0.424895	0.605604	0.228636	0.769609	0.711362									0.288102	0.35628	0.47416	0.41836	0.367853	0.409632											0.0416411
4	0.652444	0.709691	0.867007	0.545766	0.694584	0.737394	0.630955	0.657828	0.517704	0.763073							0.181773	0.472512	0.407087	0.448135	0.662836	0.415831	0.366968	0.522552									0.308294	0.296707	0.218796	0.260969	0.363424	0.280118											-0.038981
5	0.487964	0.878072	0.635104	0.420417	0.578131	0.881195	0.394842	0.750805	0.388373	0.724434							0.274863	0.536059	0.268353	0.45777	0.20951	0.103948	0.448008	0.359124									0.269492	0.30096	0.297892	0.206038	0.119063	0.153617											0.0652255
6	0.480619	0.428515	0.778277	0.112715	0.528316	0.545861	0.270918	0.571698	0.452681	0.667232							-0.123795	0.360436	0.286927	0.301026	0.122503	0.280955	-0.0005189	0.271206									0.185215	0.0811192	0.0538749	0.300686	0.226766	0.146179											0.0616361
7	0.405315	0.705521	0.558952	0.353573	0.506933	0.662718	0.0129439	0.8108	0.231513	0.651664							0.0659187	0.125905	-0.0533106	0.189409	0.0206366	0.0764288	0.157084	0.180112									0.188823	0.153243	0.191387	0.249299	-0.0382743	0.255287											-0.008887
8	0.378594	0.396449	0.504057	0.177148	0.335219	0.634556	0.0915599	0.432719	0.333204	0.729465							0.00470713	0.0641382	-0.0796259	0.328896	-0.0619048	0.173542	0.14437	0.251868									0.0764493	0.120039	-0.0316541	0.325383	0.0679991	0.475058											-0.143448
9	0.100308	0.651549	0.539079	-0.0710487	0.240848	0.516093	-0.225522	0.641	0.0513057	0.595173							0.149405	0.0520635	-0.117162	0.326161	0.0527696	0.202088	-0.0415086	0.318742									0.0392589	0.103115	0.189882	0.229562	0.212737	0.231487											0.0377732
10	0.197214	0.48339	0.426337	-0.0560473	0.217625	0.335391	-0.395104	0.59735	-0.170391	0.451813							-0.267878	0.062529	-0.17722	0.198173	-0.207731	0.163575	-0.0475958	0.252863									0.206686	0.109371	0.113735	0.350565	0.270561	0.135631											-0.0597219
11	-0.0366811	0.215396	0.303738	-0.15188	0.0861571	0.304392	-0.0974658	0.502698	-0.0346832	0.358701							0.0421574	0.296726	-0.199676	0.298414	-0.112071	0.0568246	-0.134295	0.310418									0.166782	0.07949	0.0304872	0.209306	0.179926	0.230028											-0.0983403
12	0.206651	0.205882	0.390631	-0.262007	-0.0297356	0.260129	-0.390319	0.554994	-0.0313526	0.402608							-0.361211	0.0150497	-0.143541	-0.0225186	-0.347668	0.232612	0.0408066	0.375557									0.182672	0.172601	0.16214	0.148921	-0.0397762	0.370962											-0.0949677
[truncated: 3 more columns]

## Sheet: Figure2B
2 min					1 day
Empty	MB312C	MB213B	MB109B+MB315C	MB043C	Empty	MB109BMB315C	MB043C
0.040507	0.091599	0.184204	0.422229	0.501735	0.281345	0.389796	0.396624
-0.11176	0.182437	0.52596	0.47905	0.664972	0.28999	0.158217	0.511912
0.267835	0.036346	0.254088	0.477038	0.521395	0.165076	0.34767	0.506998
0.227021	0.262831	0.427084	0.519319	0.763578	0.011114	0.111074	0.486105
0.329263	0.184829	0.180593	0.31771	0.472526	0.422342	0.05649	0.451871
0.275756	0.28526	0.037567	0.414329	0.522614	0.168365	-0.00253	0.351361
0.281345	0.138479	0.350343	0.345768	0.386472	0.140318	0.051627	0.419717
0.28999	0.121994	-0.12176	0.304367	0.644971	-0.04364	0.042475	0.347646
0.165076							0.602722
0.011114							0.515245

## Sheet: Figure2C
ISI-10s
0.035036
-0.06305
-0.1212
-0.12379
-0.05574
-0.18046

## Sheet: Figure2D
First-order			Second-order
MB043C x TNT	MB196B TNT	Empty x TNT	MB043C x TNT	MB196B TNT	Empty x TNT
0.369804	0.832	0.811518	0.272939	0.374	0.402253
0.336435	0.764	0.821138	0.164626	0.241	0.476516
0.291519	0.751	0.71466	0.191411	0.195	0.554493
0.559946	0.715	0.667485	0.168213	0.061	0.507431
0.507445	0.818	0.967337	0.347554	0.241	0.369816
0.46574	0.807	0.77402	0.191474	0.116	0.335836
0.697977	0.689	0.89141	0.150818	0.34	0.341737
0.788813	0.807	0.914606	0.12884	0.219	0.530839
			0.333559	0.349	0.639999
			0.138749	0.442	0.499899
			0.115528		0.393312
			0.287289		0.371663
			-0.13157		0.297394
			0.275621		0.299624

## Sheet: Figure2E
	First order																second																second-order no-omission
1	0.085403	0.302472	0.042166	0.28999	0.048427	0.037939	0.430703	0.20912	0.061809	0.172794	0.235345	0.180581	-0.1236	0.094029	0.358823	0.110408	0.396702	-0.08051	-0.04138	0.008084	0.204199	0.205071	0.277287	0.289493									0.158465	0.161581	0.187557	0.164159	0.244253	0.0818135	0.275312	0.27864	0.33246	0.263033
3	0.293705	0.351852	-0.0899	0.523068	0.269422	0.332641	0.305044	0.386534	0.169829	0.290958	0.392473	0.234024	0.567909	0.234915	0.107405	0.298575	0.029702	0.191915	0.393273	0.324516	0.21068	0.409889	0.415719	0.526735									0.425671	0.328455	0.414549	0.447143	0.490875	0.24944	0.442982	0.303679	0.378618	0.306291
5	0.395532	0.519223	0.610277	0.312814	0.332602	0.62824	0.488355	0.552829	0.5012	0.668845	0.706169	0.719812	0.33659	0.481952	0.410167	0.560131	0.319192	0.257051	0.574091	0.493113	0.392819	0.457103	0.445467	0.694378									0.399535	0.422772	0.162888	0.228892	0.298657	0.0407074	0.322912	0.368491	0.579348	0.359848
7	0.368653	0.447108	0.183671	0.387077	0.27347	0.493937	0.544111	0.653283	0.514622	0.700262	0.698139	0.535687	0.677453	0.682209	0.524067	0.590827	0.293925	0.170432	0.414785	0.252312	0.53697	0.427762	0.257514	0.619461									0.421193	0.462996	0.316035	0.375572	0.425269	0.259029	0.424501	0.420497	0.520564	0.33861
9	0.443791	0.40939	0.398833	0.473805	0.535183	0.56579	0.456786	0.650894	0.655696	0.625274	0.724029	0.716198	0.658839	0.628533	0.580392	0.7408	0.0672	0.243868	0.337555	0.195819	0.10186	0.127437	0.078103	0.574313									0.401811	0.616467	0.325928	0.379604	0.404684	0.423991	0.457474	0.541007	0.48109	0.335818

## Sheet: Figure2F
second-order	second-order no-omission
0.655963	0.685795
0.797934	0.588941
0.635788	0.325854
0.667422	0.713619
0.779075	0.520599
0.897567	0.618851
0.714028	0.662332
0.924377	0.824029
	0.865538
	0.818196

## Sheet: Figure2G
	First order																second																second-order no-omission
1	0.733812	0.355313	0.754163	0.552196	0.675914	0.4305	0.606789	0.388497									0.501735	0.664972	0.521395	0.763578	0.472526	0.522614	0.386472	0.644971	0.644971
2	0.57094	0.594435	0.52935	0.353662	0.445874	0.525361	0.51179	0.353237									0.254279	0.389431	0.30076	0.425886	0.241567	0.371574	0.29264	0.37735	0.37735
3	0.43182	0.37772	0.408477	0.454365	0.569026	0.307825	0.467946	0.39836									0.0395025	0.441894	-0.0754786	0.293908	0.114555	0.00138075	0.0290739	-0.0528634	-0.0528634
4	0.308198	0.446904	0.300807	0.213726	0.34682	0.210455	0.238161	0.114843									0.0118382	0.326424	0.079093	0.246739	0.0268725	0.00414367	0.236076	0.2163	0.2163
5	0.319601	0.294482	0.333134	0.445744	0.446984	0.246781	0.254532	0.164148									-0.0889915	0.220132	0.0445933	0.223154	0.128661	0.193739	-0.0208495	0.0557287	0.0557287
6	0.0843695	0.490502	0.315261	0.140618	0.224875	0.132503	0.140367	0.283304									0.136568	0.0279794	0.00634066	0.126933	0.0983176	-0.0738333	0.144094	0.284287	0.284287
