# Supplementary material for: Hierarchical architecture of dopaminergic circuits enables second-order conditioning in Drosophila
Source: eLife. 2023 Jan 24;12:e79042. doi: 10.7554/eLife.79042 (PMC9937650; doi:10.7554/eLife.79042)
Supplement: Figure 3—figure supplement 3—source data 1. [file elife-79042-fig3-figsupp3-data1.xlsx]

## Sheet: Sheet1
	Control				TTX
	Current				Current
Time (x10^-4) (sec)	0pA	50pA	100pA	150pA	0pA	50pA	100pA	150pA
1	-65.9876	-64.9687	-63.5454	-68.6764	-61.6998	-60.574	-60.0842	-59.3217
2	-66.0304	-64.9325	-63.6144	-68.6665	-61.7129	-60.597	-60.0218	-59.3677
3	-66.0567	-64.9983	-63.6539	-68.5778	-61.7261	-60.5115	-59.933	-59.2789
4	-66.1323	-64.9818	-63.7689	-68.5022	-61.7688	-60.482	-60.0251	-59.3907
5	-66.0337	-65.0377	-63.7492	-68.5449	-61.943	-60.4852	-60.0086	-59.3447
6	-65.9515	-65.0213	-63.6966	-68.4003	-62.0087	-60.5411	-59.9035	-59.2855
7	-66.0337	-65.1725	-63.7722	-68.4825	-62.0416	-60.5313	-60.0119	-59.3874
8	-65.9351	-65.1232	-63.8117	-68.4989	-62.0811	-60.5543	-60.0021	-59.4334
9	-65.9088	-65.1856	-63.7788	-68.5219	-62.1369	-60.505	-60.0316	-59.3611
10	-65.9613	-65.1889	-63.8544	-68.3937	-62.1665	-60.482	-60.0579	-59.417
11	-65.9646	-65.2349	-63.9267	-68.4299	-62.1862	-60.5083	-60.0645	-59.3841
12	-65.9975	-65.2283	-63.8971	-68.351	-62.229	-60.505	-60.0645	-59.3414
13	-65.9646	-65.2612	-63.9497	-68.3674	-62.2816	-60.5313	-60.0579	-59.4301
14	-66.0106	-65.2218	-64.0943	-68.4101	-62.2717	-60.5937	-60.0119	-59.3611
15	-65.889	-65.327	-64.0483	-68.3313	-62.252	-60.6463	-59.9363	-59.4005
16	-65.9186	-65.3368	-63.9168	-68.4496	-62.4821	-60.5641	-60.0612	-59.3315
17	-65.9088	-65.2842	-64.1338	-68.4233	-62.4426	-60.5641	-59.9659	-59.3611
18	-65.7871	-65.2251	-64.0779	-68.4036	-62.5379	-60.5411	-59.9955	-59.4005
19	-65.8167	-65.3237	-64.0779	-68.4167	-62.5412	-60.5608	-59.9823	-59.4729
20	-65.8792	-65.3927	-64.1305	-68.3181	-62.5445	-60.5576	-59.9988	-59.3907
21	-65.9811	-65.3763	-64.0911	-68.3806	-62.607	-60.5641	-60.0842	-59.4564
22	-65.9186	-65.4453	-64.1371	-68.3674	-62.6201	-60.4787	-60.0612	-59.417
23	-66.0238	-65.4354	-64.1897	-68.3181	-62.8239	-60.4852	-59.9626	-59.4005
24	-65.8923	-65.4453	-64.0878	-68.3608	-62.6694	-60.5641	-59.9889	-59.417
25	-65.9679	-65.4289	-64.1897	-68.374	-62.6464	-60.574	-60.0054	-59.417
26	-66.0435	-65.5012	-64.1798	-68.3871	-62.5609	-60.6365	-60.0744	-59.417
27	-65.889	-65.5965	-64.1831	-68.3543	-62.4821	-60.4787	-60.0251	-59.4367
28	-66.0041	-65.6195	-64.1831	-68.2918	-62.4196	-60.4885	-60.0054	-59.3841
29	-66.129	-65.6491	-64.1436	-68.2655	-62.5675	-60.5378	-59.9889	-59.4466
30	-66.0567	-65.6852	-64.2521	-68.4759	-62.6793	-60.5346	-59.9495	-59.3578
31	-66.0632	-65.7904	-64.2324	-68.3937	-62.6793	-60.5839	-59.9002	-59.3118
32	-66.2177	-65.8101	-64.2554	-68.3576	-62.6464	-60.6036	-59.9889	-59.3644
33	-66.175	-65.8562	-64.2192	-68.4364	-62.676	-60.5773	-60.0251	-59.4137
34	-66.1947	-65.8003	-64.2357	-68.4036	-62.6727	-60.6134	-60.0875	-59.44
35	-66.3098	-65.8693	-64.2357	-68.3576	-62.7154	-60.6266	-59.9758	-59.394
36	-66.3525	-65.9975	-64.3047	-68.3871	-62.6464	-60.597	-60.0119	-59.3775
37	-66.4281	-66.0369	-64.3902	-68.3543	-62.5018	-60.574	-59.933	-59.3611
38	-66.4314	-66.0994	-64.4296	-68.1866	-62.6333	-60.4885	-60.0021	-59.3447
39	-66.4051	-66.1487	-64.3869	-68.2754	-62.5445	-60.574	-60.0086	-59.2789
40	-66.4051	-66.1717	-64.3606	-68.2557	-62.413	-60.7022	-60.0908	-59.3447
41	-66.461	-66.2309	-64.3672	-68.2162	-62.3309	-60.5444	-59.9528	-59.2987
42	-66.4478	-66.2539	-64.3014	-68.1373	-62.2783	-60.5543	-60.0119	-59.2263
43	-66.4314	-66.3952	-64.3376	-68.3115	-62.3309	-60.5313	-59.956	-59.2165
44	-66.4807	-66.4544	-64.3737	-68.0289	-62.2717	-60.62	-59.8772	-59.2
45	-66.5037	-66.6483	-64.4066	-68.0551	-62.3046	-60.5346	-59.9856	-59.2329
46	-66.5168	-66.5497	-64.4526	-68.1275	-62.344	-60.5641	-59.9035	-59.2526
47	-66.4248	-66.6943	-64.4493	-68.0782	-62.3539	-60.4951	-59.9725	-59.1738
48	-66.5234	-66.5168	-64.4428	-68.0354	-62.2914	-60.4064	-59.9429	-59.2789
49	-66.5103	-66.7009	-64.3014	-67.9796	-62.3374	-60.5707	-59.8969	-59.2789
50	-66.4905	-66.7075	-64.423	-68.0551	-62.39	-60.5543	-59.9528	-59.1705
51	-66.553	-66.7404	-64.4921	-68.0157	-62.2585	-60.4852	-59.9166	-59.2
52	-66.599	-66.8784	-64.4099	-67.8875	-62.4065	-60.4655	-59.9856	-59.1803
53	-66.6812	-66.8521	-64.4888	-67.8678	-62.367	-60.5641	-60.0021	-59.2066
54	-66.668	-66.8784	-64.4658	-67.9105	-62.275	-60.4984	-60.0514	-59.2461
55	-66.7404	-66.9211	-64.4296	-67.904	-62.2684	-60.5871	-59.933	-59.2296
56	-66.6615	-66.8291	-64.4461	-67.9434	-62.3144	-60.6463	-59.9725	-59.1869
57	-66.7897	-66.6878	-64.5315	-67.802	-62.436	-60.5346	-59.8903	-59.2033
58	-66.8061	-66.7206	-64.4954	-67.7856	-62.5051	-60.6134	-59.9429	-59.1869
59	-66.7831	-66.6516	-64.4198	-67.7823	-62.5807	-60.6825	-59.8739	-59.2099
60	-66.6812	-66.5892	-64.4526	-67.7264	-62.6234	-60.6003	-60.0185	-59.2494
61	-66.7601	-66.4774	-64.4723	-67.8119	-62.5412	-60.5871	-59.9922	-59.2033
62	-66.6976	-66.3624	-64.3803	-67.7067	-62.6727	-60.5839	-59.9856	-59.2329
63	-66.7206	-66.2802	-64.3409	-67.6048	-62.6201	-60.5839	-59.9593	-59.1738
64	-66.7305	-66.2243	-64.3244	-67.5752	-62.6004	-60.5313	-59.8574	-59.2231
65	-66.6286	-66.1388	-64.2653	-67.5687	-62.4229	-60.4458	-60.0415	-59.1672
66	-66.7371	-66.1027	-64.4066	-67.4865	-62.344	-60.4425	-59.9922	-59.0554
67	-66.7962	-66.0304	-64.3113	-67.6443	-62.3604	-60.5247	-59.9462	-59.1672
68	-66.8127	-65.8364	-64.1173	-67.4931	-62.3013	-60.5477	-59.8706	-59.1803
69	-66.8357	-65.6688	-64.2357	-67.3616	-62.3144	-60.4622	-59.9396	-59.1212
70	-66.8094	-65.6754	-64.1732	-67.2926	-62.2881	-60.5871	-59.8739	-59.0949
71	-66.8686	-65.5538	-64.1667	-67.2893	-62.2684	-60.6266	-59.9725	-59.0784
72	-66.954	-65.4157	-64.0976	-67.2203	-62.2224	-60.5214	-59.9396	-59.1179
73	-66.8653	-65.419	-64.045	-67.2235	-62.1961	-60.5806	-60.0119	-59.0061
74	-67.046	-65.4058	-63.9826	-67.1348	-62.2355	-60.5181	-59.91	-59.0521
75	-67.0329	-65.2645	-63.8873	-67.0986	-62.2224	-60.6036	-59.933	-59.016
76	-67.0493	-65.2546	-63.9234	-67.0132	-62.0778	-60.5641	-60.0415	-58.9338
77	-67.1315	-65.1692	-63.8018	-67.1447	-62.1665	-60.5576	-59.8969	-58.9634
78	-67.1545	-65.1034	-63.8544	-67.1151	-62.2421	-60.5148	-59.9298	-59.0324
79	-67.1808	-65.087	-63.7624	-67.0625	-62.1336	-60.5017	-60.0086	-59.039
80	-67.1381	-65.0508	-63.6868	-67.0362	-62.1994	-60.5937	-59.9429	-59.1376
81	-67.2203	-64.9818	-63.6046	-66.9474	-62.1698	-60.5148	-59.9856	-59.177
82	-67.1874	-64.9227	-63.5684	-66.9047	-62.2355	-60.4425	-59.9495	-59.0587
83	-67.2235	-64.8701	-63.6736	-66.8488	-62.3243	-60.5543	-59.8936	-59.108
84	-67.3649	-64.8865	-63.5783	-66.9277	-62.3111	-60.5839	-59.933	-59.1705
85	-67.3386	-64.7254	-63.4797	-66.8587	-62.3769	-60.5247	-59.956	-59.0357
86	-67.3747	-64.686	-63.552	-66.8554	-62.4426	-60.5411	-59.9396	-59.0357
87	-67.3287	-64.6038	-63.529	-66.7699	-62.4755	-60.5181	-59.9823	-59.0127
88	-67.2959	-64.5775	-63.5093	-66.6746	-62.4196	-60.5115	-59.8903	-59.1179
89	-67.424	-64.4691	-63.4994	-66.7436	-62.3933	-60.551	-60.0021	-59.0324
90	-67.3222	-64.4822	-63.3679	-66.7108	-62.4623	-60.505	-59.9133	-59.1179
91	-67.3254	-64.3211	-63.4106	-66.691	-62.4328	-60.4425	-59.8936	-59.0521
92	-67.4175	-64.3507	-63.3646	-66.691	-62.5314	-60.4721	-59.8837	-58.9535
93	-67.3879	-64.2521	-63.3515	-66.5727	-62.5412	-60.528	-59.8443	-58.9831
94	-67.3616	-64.2225	-63.4501	-66.4708	-62.5708	-60.5871	-59.887	-59.0061
95	-67.378	-64.1141	-63.3844	-66.553	-62.7023	-60.5806	-59.8246	-58.9272
96	-67.4602	-64.2028	-63.4008	-66.5694	-62.8042	-60.5115	-59.8739	-58.9831
97	-67.3978	-64.0713	-63.4205	-66.576	-62.6957	-60.4951	-59.7753	-58.9141
98	-67.4799	-64.0089	-63.4106	-66.484	-62.653	-60.5083	-59.7161	-58.97
99	-67.4766	-63.9497	-63.4731	-66.4643	-62.6793	-60.4787	-59.795	-59.0193
100	-67.4931	-63.8708	-63.4041	-66.4182	-62.7154	-60.4688	-59.8279	-58.9732
101	-67.6246	-63.7426	-63.4895	-66.4018	-62.7253	-60.528	-59.8377	-59.085
102	-67.5555	-63.6375	-63.4534	-66.3919	-62.8765	-60.4425	-59.9396	-59.0028
103	-67.5227	-63.6112	-63.5388	-66.4938	-62.8633	-60.4984	-59.8147	-59.0061
104	-67.5818	-63.4435	-63.4764	-66.507	-62.9521	-60.4787	-59.8147	-59.0258
105	-67.6015	-63.4271	-63.4797	-66.3952	-63.0704	-60.6167	-59.8739	-59.0127
106	-67.7199	-63.483	-63.4632	-66.5168	-63.0967	-60.5346	-59.864	-58.9995
107	-67.7659	-63.4205	-63.5651	-66.5398	-63.2249	-60.4524	-59.8706	-59.0521
108	-67.7955	-63.3778	-63.5421	-66.4478	-63.2348	-60.574	-59.8048	-59.0686
109	-67.7462	-63.2463	-63.5914	-66.6615	-63.2972	-60.482	-59.8048	-58.97
110	-67.7889	-63.2627	-63.644	-66.4478	-63.4287	-60.459	-59.7687	-59.0751
111	-67.8777	-63.3088	-63.6243	-66.4643	-63.2611	-60.5608	-59.7457	-59.2461
112	-67.7199	-63.1674	-63.6177	-66.4511	-63.192	-60.4622	-59.7292	-59.1047
113	-67.7232	-63.2233	-63.6868	-66.507	-63.2019	-60.5181	-59.6734	-59.0949
114	-67.8777	-63.1345	-63.6079	-66.5366	-63.2216	-60.4458	-59.7227	-59.0488
115	-67.9533	-63.082	-63.6407	-66.5267	-63.0967	-60.5017	-59.8377	-59.0916
116	-67.8251	-63.0458	-63.7098	-66.5004	-63.0934	-60.4425	-59.6997	-59.2263
117	-67.95	-63.0294	-63.7361	-66.6483	-63.146	-60.459	-59.8443	-59.2198
118	-67.9533	-63.0425	-63.7919	-66.6845	-63.0178	-60.4162	-59.8048	-59.2198
119	-67.9401	-63.0557	-63.8905	-66.6549	-63.0737	-60.4458	-59.749	-59.2231
120	-67.9533	-62.9669	-63.815	-66.7502	-63.0211	-60.4524	-59.8081	-59.2263
121	-68.088	-62.9012	-63.9464	-66.7338	-63.0047	-60.4951	-59.7391	-59.1869
122	-68.1636	-62.8519	-63.884	-66.8291	-63.0638	-60.4787	-59.795	-59.2132
123	-68.2031	-62.773	-63.9826	-66.8488	-62.9324	-60.4721	-59.772	-59.2033
124	-68.1077	-62.7631	-63.9694	-66.9146	-63.0606	-60.3866	-59.8443	-59.1573
125	-68.1439	-62.7105	-63.8708	-66.9277	-63.1099	-60.5181	-59.818	-59.2526
126	-68.1899	-62.7302	-63.9727	-67.0428	-63.0441	-60.4425	-59.818	-59.2592
127	-68.1308	-62.5396	-63.9662	-66.9606	-62.8962	-60.3538	-59.8016	-59.3085
128	-68.1801	-62.4377	-63.953	-67.0296	-62.8206	-60.3768	-59.8213	-59.3381
129	-68.2129	-62.5297	-64.0023	-67.0559	-62.9094	-60.4195	-59.7325	-59.2625
130	-68.2918	-62.3555	-64.0713	-67.2005	-62.8239	-60.4031	-59.7523	-59.348
131	-68.3641	-62.3128	-64.0286	-67.217	-62.8929	-60.5444	-59.7983	-59.3282
132	-68.3838	-62.2569	-64.0911	-67.1874	-62.8108	-60.3801	-59.6799	-59.3118
133	-68.4134	-62.2372	-64.1601	-67.2729	-62.8239	-60.1993	-59.7128	-59.2691
134	-68.3904	-62.2208	-64.0943	-67.2498	-62.6563	-60.3834	-59.7128	-59.2592
135	-68.328	-62.0729	-64.1436	-67.3353	-62.6826	-60.3373	-59.6865	-59.2494
136	-68.4562	-61.9578	-64.239	-67.3254	-62.6168	-60.334	-59.8213	-59.2789
137	-68.512	-61.9085	-64.1962	-67.401	-62.5872	-60.3669	-59.7194	-59.2658
138	-68.4134	-61.8	-64.3409	-67.4471	-62.722	-60.3505	-59.8147	-59.2428
139	-68.5745	-61.7113	-64.3409	-67.4306	-62.8108	-60.3834	-59.8541	-59.2231
140	-68.5351	-61.6193	-64.3376	-67.3452	-62.8305	-60.4491	-59.7917	-59.2395
141	-68.5975	-61.5075	-64.3672	-67.4898	-62.8699	-60.482	-59.8509	-59.2296
142	-68.6895	-61.5962	-64.3639	-67.4536	-62.8995	-60.3242	-59.7555	-59.3085
143	-68.6008	-61.4943	-64.4723	-67.4898	-62.8699	-60.3012	-59.8804	-59.2
144	-68.7125	-61.3727	-64.3935	-67.4306	-62.9028	-60.3932	-59.8311	-59.3447
145	-68.729	-61.4845	-64.4329	-67.3879	-62.7089	-60.3932	-59.91	-59.2329
146	-68.7323	-61.238	-64.5249	-67.286	-62.7582	-60.3078	-59.864	-59.348
147	-68.8046	-61.1952	-64.4493	-67.263	-62.8864	-60.288	-59.7227	-59.3512
148	-68.8966	-61.0407	-64.5151	-67.2991	-62.7877	-60.3702	-59.7654	-59.2362
149	-68.9032	-61.0506	-64.4756	-67.0986	-62.7812	-60.2946	-59.7983	-59.3414
150	-68.9656	-60.8797	-64.5841	-66.9935	-62.7121	-60.3373	-59.795	-59.3841
151	-68.9591	-60.8468	-64.4592	-66.9343	-62.5511	-60.2519	-59.8016	-59.3019
152	-68.9361	-60.7581	-64.4723	-66.8192	-62.6201	-60.3603	-59.8509	-59.3118
153	-68.9163	-60.689	-64.5447	-66.7929	-62.7319	-60.3571	-59.8246	-59.3775
154	-69.0281	-60.5378	-64.5973	-66.6089	-62.6858	-60.2519	-59.7917	-59.3512
155	-69.1037	-60.4064	-64.4559	-66.6352	-62.7089	-60.3866	-59.8706	-59.417
156	-69.0445	-60.3932	-64.4296	-66.5596	-62.745	-60.3143	-59.8147	-59.3578
157	-69.1103	-60.3045	-64.4756	-66.3985	-62.699	-60.2617	-59.8739	-59.394
158	-69.0971	-60.2552	-64.4395	-66.3755	-62.6924	-60.2157	-59.7654	-59.4268
159	-69.2056	-60.0481	-64.4954	-66.3229	-62.8042	-60.242	-59.8541	-59.4005
160	-69.2155	-60.0054	-64.3474	-66.3196	-62.8009	-60.2617	-59.749	-59.3775
161	-69.2253	-59.8213	-64.3606	-66.2374	-62.6891	-60.2847	-59.7851	-59.3578
162	-69.2483	-59.7621	-64.5052	-66.152	-62.5938	-60.3308	-59.8048	-59.2987
163	-69.2483	-59.6274	-64.4198	-66.106	-62.4919	-60.196	-59.795	-59.3052
164	-69.2023	-59.5419	-64.4296	-66.0271	-62.5248	-60.242	-59.772	-59.3019
165	-69.2483	-59.4301	-64.3902	-65.8792	-62.5314	-60.1894	-59.7818	-59.154
166	-69.2943	-59.4531	-64.4625	-65.843	-62.4886	-60.265	-59.7621	-59.3151
167	-69.3404	-59.3282	-64.4526	-65.8726	-62.5412	-60.242	-59.6931	-59.2691
168	-69.3305	-59.2132	-64.3902	-65.7641	-62.6365	-60.3176	-59.749	-59.2461
169	-69.4028	-59.1507	-64.4625	-65.5702	-62.6661	-60.3406	-59.6997	-59.2822
170	-69.3009	-59.0653	-64.4559	-65.5077	-62.5379	-60.3308	-59.6767	-59.2658
171	-69.2713	-59.0127	-64.4362	-65.4946	-62.4426	-60.2453	-59.5419	-59.3447
172	-69.2122	-58.8714	-64.4855	-65.3927	-62.39	-60.2091	-59.4729	-59.3743
173	-69.2155	-58.8155	-64.5578	-65.3237	-62.413	-60.2322	-59.4729	-59.3512
174	-69.2187	-58.9207	-64.5118	-65.3434	-62.4262	-60.3505	-59.4433	-59.4137
175	-69.153	-58.822	-64.4822	-65.2283	-62.4229	-60.2617	-59.4499	-59.3874
176	-69.2483	-58.7859	-64.6235	-65.1659	-62.5248	-60.2256	-59.4367	-59.3907
177	-69.1892	-58.7366	-64.5414	-65.1396	-62.4788	-60.196	-59.4203	-59.4334
178	-69.2187	-58.7563	-64.5611	-65.1527	-62.5478	-60.2059	-59.3578	-59.3874
179	-69.13	-58.7892	-64.6367	-64.9983	-62.5577	-60.2519	-59.4104	-59.4367
180	-69.0445	-58.7859	-64.7189	-65.0015	-62.3769	-60.1828	-59.44	-59.486
181	-69.2155	-58.7399	-64.663	-64.9851	-62.3309	-60.265	-59.4236	-59.3545
182	-69.245	-58.7201	-64.7517	-64.8799	-62.2257	-60.173	-59.3447	-59.417
183	-69.1924	-58.7694	-64.7123	-64.801	-62.1534	-60.2486	-59.3611	-59.3841
184	-69.1727	-58.7694	-64.8208	-64.8241	-62.1731	-60.2979	-59.2329	-59.4038
185	-69.1957	-58.8483	-64.8175	-64.7484	-62.1698	-60.2617	-59.2165	-59.2559
186	-69.153	-58.822	-64.8405	-64.7254	-62.0942	-60.2387	-59.3085	-59.3743
187	-69.1826	-58.8944	-64.732	-64.6761	-62.0022	-60.1368	-59.3118	-59.44
188	-69.2286	-58.9207	-64.7419	-64.6761	-62.0318	-60.1401	-59.3775	-59.3545
189	-69.3075	-58.9765	-64.7715	-64.6137	-62.0843	-60.2157	-59.2954	-59.417
190	-69.2056	-59.0554	-64.7254	-64.7484	-61.9726	-60.15	-59.2987	-59.417
191	-69.245	-59.1014	-64.6301	-64.6498	-62.0909	-60.0875	-59.3052	-59.4137
192	-69.2976	-59.154	-64.6203	-64.663	-62.0515	-60.1598	-59.3644	-59.2724
193	-69.3601	-59.1738	-64.5052	-64.5841	-61.9529	-60.127	-59.2362	-59.2954
194	-69.4061	-59.2987	-64.3836	-64.5611	-62.0022	-60.1631	-59.2231	-59.3151
195	-69.2746	-59.3184	-64.2291	-64.5742	-62.0778	-60.1434	-59.2625	-59.3019
196	-69.2549	-59.4203	-64.1141	-64.4986	-62.2125	-60.1434	-59.1244	-59.2559
197	-69.3667	-59.5386	-64.022	-64.5216	-62.1928	-60.1993	-59.1606	-59.2132
198	-69.4587	-59.5748	-63.884	-64.5184	-62.2323	-60.2026	-59.1738	-59.3151
199	-69.5113	-59.6306	-63.6769	-64.4559	-62.0318	-60.173	-59.062	-59.2691
200	-69.4686	-59.7523	-63.5158	-64.4428	-62.0482	-60.104	-59.1179	-59.2625
201	-69.5507	-59.8673	-63.266	-64.4461	-61.9824	-60.0875	-59.0291	-59.1376
202	-69.4423	-59.8969	-63.243	-64.4493	-62.0383	-60.0678	-59.1244	-59.4005
203	-69.5014	-59.9889	-63.0557	-64.4	-62.0778	-60.1105	-59.0193	-59.2625
204	-69.5343	-60.0941	-62.9209	-64.4329	-62.1008	-60.0974	-59.039	-59.1869
205	-69.6493	-60.1434	-62.7861	-64.4461	-62.1402	-60.1335	-59.1113	-59.2526
206	-69.6033	-60.3308	-62.6415	-64.5216	-62.1172	-60.2223	-59.0193	-59.3052
207	-69.6263	-60.265	-62.5166	-64.4658	-62.1172	-60.1697	-58.8714	-59.2822
208	-69.6395	-60.4359	-62.3029	-64.3869	-62.0383	-60.2387	-59.0718	-59.2756
209	-69.8005	-60.5247	-62.1945	-64.4592	-62.0383	-60.2486	-58.8911	-59.1836
210	-69.7282	-60.6102	-62.1386	-64.331	-62.0383	-60.2782	-58.8648	-59.154
211	-69.7611	-60.6923	-61.8822	-64.3836	-62.0745	-60.1138	-58.9272	-59.154
212	-69.646	-60.7088	-61.9217	-64.3507	-62.0548	-60.1467	-58.8976	-59.0653
213	-69.7841	-60.7877	-61.7343	-64.4066	-62.035	-60.0284	-58.8023	-59.1047
214	-69.8235	-60.7515	-61.5239	-64.3639	-62.0449	-60.1105	-58.7563	-59.039
215	-69.9682	-60.8271	-61.5568	-64.4263	-62.1073	-60.1664	-58.8845	-58.9864
216	-69.9419	-60.9783	-61.5075	-64.3737	-62.1304	-60.1368	-58.8155	-59.0423
217	-69.909	-60.9586	-61.4582	-64.4986	-62.3276	-60.1894	-58.7925	-58.9831
218	-69.9813	-61.0342	-61.3596	-64.4789	-62.3572	-60.1138	-58.707	-59.0193
219	-70.0175	-61.1131	-61.2314	-64.3836	-62.3078	-60.1828	-58.7925	-58.9601
220	-70.0306	-61.2708	-61.261	-64.4526	-62.3374	-60.104	-58.661	-58.9732
221	-70.0504	-61.2708	-61.1657	-64.4756	-62.4065	-60.1598	-58.7432	-58.8385
222	-69.9452	-61.261	-61.09	-64.4493	-62.5379	-60.104	-58.8253	-58.8483
223	-69.9945	-61.3694	-61.1328	-64.5381	-62.5018	-60.0284	-58.8023	-58.8352
224	-70.0766	-61.5371	-61.0703	-64.5479	-62.4295	-59.9758	-58.8155	-58.8582
225	-69.9254	-61.5568	-61.0407	-64.5118	-62.344	-59.9495	-58.7596	-58.8385
226	-69.932	-61.777	-60.9849	-64.6433	-62.2553	-60.0645	-58.7201	-58.7957
227	-69.8564	-61.8756	-61.0112	-64.6531	-62.2553	-60.0842	-58.7497	-58.8155
228	-69.8926	-61.9348	-61.0079	-64.7057	-62.0646	-60.0185	-58.684	-58.8681
229	-69.9912	-61.9742	-60.8961	-64.7222	-62.0153	-60.0875	-58.7662	-58.8812
230	-69.8991	-61.9677	-60.9257	-64.709	-62.0383	-59.9429	-58.7432	-58.8516
231	-69.9386	-62.0466	-60.9257	-64.7057	-61.943	-59.9922	-58.6413	-58.8681
232	-69.932	-62.1254	-60.9158	-64.8438	-61.8773	-59.9922	-58.7563	-58.8648
233	-69.7611	-62.2306	-60.8271	-64.8701	-61.7589	-60.0316	-58.8056	-58.9075
234	-69.7611	-62.418	-60.8172	-64.8339	-61.6275	-59.9758	-58.7892	-58.8319
235	-69.8334	-62.4739	-60.8107	-64.9522	-61.6866	-59.9528	-58.8056	-58.8188
236	-69.7742	-62.5363	-60.7778	-65.018	-61.6603	-60.0678	-58.7859	-58.8319
237	-69.7512	-62.7204	-60.8567	-65.0344	-61.6735	-60.0218	-58.7694	-58.9174
238	-69.8334	-62.773	-60.8238	-65.0673	-61.6636	-60.0547	-58.7892	-58.822
239	-69.7578	-62.8223	-60.8238	-65.1002	-61.6439	-60.1237	-58.7004	-58.7563
240	-69.6691	-62.8617	-60.7975	-65.0508	-61.6077	-60.0415	-58.8385	-58.7859
241	-69.7545	-62.9735	-60.8632	-65.1034	-61.6044	-59.9791	-58.7563	-58.9009
242	-69.7052	-63.0261	-60.7844	-65.1297	-61.6143	-59.9002	-58.7464	-58.799
243	-69.6986	-63.1937	-60.8534	-65.0377	-61.6899	-59.933	-58.7136	-58.8681
244	-69.7479	-63.2529	-60.8238	-65.0114	-61.6176	-59.8903	-58.7201	-58.8023
245	-69.7644	-63.3186	-60.7219	-65.0015	-61.5321	-59.9232	-58.6413	-58.8516
246	-69.7151	-63.4172	-60.86	-64.9818	-61.5716	-59.9166	-58.7399	-58.8812
247	-69.7512	-63.5454	-60.8271	-64.995	-61.542	-59.9528	-58.776	-58.8878
248	-69.7019	-63.4764	-60.8238	-65.0311	-61.4927	-59.9955	-58.6906	-58.8648
249	-69.6986	-63.621	-60.9356	-65.0048	-61.4565	-59.9199	-58.776	-58.9371
250	-69.7414	-63.667	-60.8041	-65.1002	-61.45	-59.956	-58.6939	-58.8516
251	-69.7907	-63.5684	-60.8731	-65.0903	-61.473	-59.9593	-58.7234	-58.8286
252	-69.7414	-63.7393	-60.9553	-65.0837	-61.4763	-59.9298	-58.7136	-58.8582
253	-69.7907	-63.7525	-60.9093	-65.041	-61.3546	-59.8837	-58.6577	-58.8516
254	-69.7841	-63.7196	-60.8435	-65.0541	-61.3513	-59.8706	-58.661	-58.9141
255	-69.8334	-63.8182	-60.8008	-65.0377	-61.3546	-59.8739	-58.7563	-59.016
256	-69.8466	-63.7887	-60.9323	-65.0837	-61.1837	-59.9199	-58.6741	-58.9338
257	-69.7775	-63.7131	-60.8041	-65.133	-61.2396	-59.9462	-58.6117	-58.9305
258	-69.9254	-63.8478	-60.8074	-65.0541	-61.1607	-59.9922	-58.661	-58.8944
259	-69.8466	-63.8182	-60.6726	-65.0311	-61.1048	-59.887	-58.6708	-58.9601
260	-69.7677	-63.8708	-60.6167	-65.0673	-61.0588	-59.7588	-58.6084	-58.9963
261	-69.8663	-63.884	-60.482	-65.0443	-60.9635	-59.8147	-58.4966	-58.9831
262	-69.8498	-63.884	-60.334	-65.1002	-61.0029	-59.7983	-58.4703	-58.9634
263	-69.8005	-63.8643	-60.265	-65.0377	-60.9701	-59.8377	-58.5295	-59.0883
264	-69.7249	-63.884	-60.1664	-65.0574	-61.0457	-59.8048	-58.5328	-59.1639
265	-69.863	-63.9004	-59.956	-65.1034	-61.0917	-59.6799	-58.4999	-59.0291
266	-69.8268	-63.9596	-59.9265	-65.1758	-61.0818	-59.726	-58.4934	-59.0423
267	-69.6789	-63.976	-59.8016	-65.0837	-61.0391	-59.7128	-58.5657	-59.1146
268	-69.8301	-63.9037	-59.6964	-65.0804	-61.072	-59.7555	-58.4572	-59.1179
269	-69.6658	-63.907	-59.5813	-65.0443	-60.9799	-59.6734	-58.4112	-59.0291
270	-69.7578	-63.9892	-59.4367	-65.1133	-60.9208	-59.7424	-58.4966	-59.0817
271	-69.7808	-63.9859	-59.1869	-65.0837	-60.9536	-59.6635	-58.5788	-59.1507
272	-69.6592	-64.0352	-59.0653	-65.0903	-60.9635	-59.7161	-58.5295	-59.0751
273	-69.7578	-64.0319	-59.0258	-65.0607	-60.8715	-59.7785	-58.5262	-59.1047
274	-69.5869	-64.0845	-58.9437	-65.1495	-60.8945	-59.7292	-58.4901	-59.0094
275	-69.6362	-64.068	-58.8582	-65.1462	-60.8747	-59.6043	-58.5459	-58.9798
276	-69.5672	-63.9727	-58.7662	-65.2086	-60.7827	-59.5945	-58.5624	-59.039
277	-69.4883	-64.0352	-58.7004	-65.1297	-60.7367	-59.5846	-58.4868	-59.1179
278	-69.5507	-64.0286	-58.5558	-65.0508	-60.6479	-59.6142	-58.5065	-59.0916
279	-69.5902	-64.0878	-58.3849	-65.0804	-60.5822	-59.6142	-58.5098	-59.0784
280	-69.5606	-64.1141	-58.4671	-65.1002	-60.4935	-59.6471	-58.5328	-59.2198
281	-69.5836	-64.0911	-58.3684	-64.9917	-60.4277	-59.5846	-58.6248	-59.1474
282	-69.5803	-64.0483	-58.2994	-65.0344	-60.3028	-59.6142	-58.4703	-59.1803
283	-69.6428	-64.1436	-58.3158	-64.8602	-60.3751	-59.5386	-58.4736	-59.108
284	-69.623	-64.0516	-58.3356	-64.9391	-60.339	-59.5024	-58.5229	-59.1409
285	-69.6362	-64.0845	-58.4375	-64.7287	-60.4014	-59.4794	-58.4671	-59.2099
286	-69.7315	-64.0845	-58.4013	-64.7484	-60.523	-59.4959	-58.5492	-59.1376
287	-69.6526	-64.1469	-58.3684	-64.5742	-60.339	-59.463	-58.5196	-59.1179
288	-69.7479	-64.045	-58.421	-64.4461	-60.477	-59.4531	-58.5854	-59.0686
289	-69.5639	-64.0483	-58.3914	-64.2817	-60.454	-59.4038	-58.4802	-59.0225
290	-69.623	-64.045	-58.4638	-64.1634	-60.5198	-59.3414	-58.5164	-59.016
291	-69.6986	-64.0976	-58.4473	-64.0911	-60.4836	-59.2592	-58.4408	-59.0883
292	-69.7874	-64.0549	-58.3553	-63.8741	-60.5296	-59.3973	-58.4901	-59.1343
293	-69.6559	-64.0417	-58.4079	-63.7393	-60.6545	-59.4466	-58.4802	-59.0981
294	-69.6428	-63.976	-58.3191	-63.6079	-60.7334	-59.2756	-58.4868	-59.0521
295	-69.7414	-64.045	-58.3126	-63.4731	-60.8452	-59.3019	-58.4835	-59.2132
296	-69.7348	-63.9826	-58.3356	-63.3482	-60.9536	-59.2789	-58.4703	-59.1212
297	-69.7249	-63.907	-58.283	-63.1214	-61.1048	-59.3085	-58.5032	-59.1179
298	-69.8071	-63.976	-58.4375	-62.9833	-61.1804	-59.3184	-58.3684	-59.0949
299	-69.7907	-63.9727	-58.4769	-62.9571	-61.4269	-59.1376	-58.3783	-59.1639
300	-69.6756	-64.0319	-58.4572	-62.7138	-61.5617	-59.1869	-58.352	-59.131
301	-69.8433	-64.0746	-58.5262	-62.6514	-61.7031	-59.2494	-58.4046	-59.1803
302	-69.8334	-64.1667	-58.5427	-62.4804	-61.6505	-59.1474	-58.3158	-59.1705
303	-69.8728	-64.1239	-58.6445	-62.4607	-61.6077	-59.1507	-58.3882	-59.062
304	-69.9156	-64.1206	-58.684	-62.2799	-61.7852	-59.2395	-58.375	-59.0488
305	-69.8268	-64.1502	-58.7267	-62.1386	-61.6833	-59.1672	-58.4408	-59.1146
306	-69.8104	-64.1469	-58.6544	-62.1682	-61.5847	-59.1738	-58.3882	-59.1047
307	-69.8301	-64.2291	-58.5755	-62.0531	-61.6538	-59.2395	-58.4013	-59.2263
308	-69.9353	-64.2127	-58.6676	-61.8954	-61.5946	-59.1935	-58.4506	-59.1869
309	-69.9452	-64.2127	-58.5459	-61.9151	-61.68	-59.1639	-58.4013	-59.1047
310	-69.9748	-64.2061	-58.6544	-61.994	-61.5157	-59.0817	-58.4276	-59.1639
311	-70.0076	-64.2291	-58.7037	-61.8099	-61.3481	-59.131	-58.4342	-59.2494
312	-69.9748	-64.2751	-58.6215	-61.754	-61.2593	-59.0949	-58.4703	-59.2
313	-69.886	-64.3376	-58.7004	-61.7244	-61.2462	-59.1146	-58.4703	-59.2198
314	-69.9649	-64.4033	-58.7234	-61.6061	-61.1837	-59.039	-58.3652	-59.1573
315	-70.0208	-64.5019	-58.7727	-61.6324	-61.1903	-58.9634	-58.4934	-59.1113
316	-70.0569	-64.5512	-58.7826	-61.6423	-61.0884	-58.9075	-58.4736	-59.1474
317	-69.9945	-64.4756	-58.8681	-61.5206	-61.1508	-59.0094	-58.4342	-59.0686
318	-70.1457	-64.6268	-58.799	-61.4319	-61.0983	-59.0193	-58.4079	-59.1244
319	-70.1555	-64.5775	-58.8714	-61.2675	-61.0227	-58.9239	-58.4868	-59.1869
320	-70.0668	-64.4855	-58.9831	-61.1624	-61.0785	-58.9174	-58.4638	-59.2263
321	-70.1687	-64.5874	-58.9502	-61.0506	-61.1015	-59.0324	-58.4769	-59.177
322	-70.0438	-64.6728	-58.9798	-60.9126	-61.0785	-58.8615	-58.4473	-59.2362
323	-70.1785	-64.6564	-59.016	-60.7778	-61.0555	-58.8319	-58.3487	-59.2494
324	-70.2541	-64.7978	-58.9371	-60.528	-60.9208	-58.8188	-58.3389	-59.1639
325	-70.1884	-64.7189	-58.8451	-60.2782	-61.0752	-58.8483	-58.3389	-59.2428
326	-70.2476	-64.7156	-58.9535	-60.1796	-60.901	-58.8056	-58.3914	-59.2231
327	-70.333	-64.6893	-59.0028	-60.0481	-60.9734	-58.8122	-58.3947	-59.3348
328	-70.3232	-64.6991	-59.0981	-59.8246	-60.9043	-58.7662	-58.3454	-59.2658
329	-70.4547	-64.709	-59.0981	-59.6175	-60.7893	-58.7694	-58.4046	-59.3118
330	-70.5335	-64.7978	-59.131	-59.417	-60.5296	-58.8681	-58.4079	-59.3184
331	-70.4875	-64.7813	-59.0784	-59.0225	-60.3455	-58.9075	-58.329	-59.2362
332	-70.4514	-64.8306	-59.0949	-59.0883	-60.4244	-58.7957	-58.375	-59.3644
333	-70.527	-64.7386	-59.1244	-58.8746	-60.2962	-58.8385	-58.4375	-59.2987
334	-70.4382	-64.801	-59.0587	-58.6741	-60.316	-58.7694	-58.2764	-59.3282
335	-70.6256	-64.7682	-59.1606	-58.5952	-60.4014	-58.7497	-58.3421	-59.2822
336	-70.5303	-64.778	-59.2428	-58.3652	-60.4474	-58.7136	-58.3783	-59.3217
337	-70.5533	-64.8109	-59.1277	-58.2896	-60.477	-58.8155	-58.3914	-59.2987
338	-70.619	-64.8931	-59.1672	-58.1153	-60.5723	-58.8549	-58.3619	-59.2921
339	-70.6815	-64.9095	-59.2691	-57.9674	-60.6512	-58.776	-58.4703	-59.2888
340	-70.6946	-64.8668	-59.1244	-57.8557	-60.7794	-58.8352	-58.4769	-59.3282
341	-70.6486	-64.8832	-59.2165	-57.7472	-60.694	-58.7925	-58.3882	-59.3381
342	-70.7275	-64.9062	-59.2987	-57.55	-60.7268	-58.7432	-58.4539	-59.3644
343	-70.7505	-64.8701	-59.2395	-57.5138	-60.8254	-58.7037	-58.4638	-59.4203
344	-70.7833	-64.8701	-59.3184	-57.4021	-60.809	-58.7333	-58.4605	-59.348
345	-70.7636	-64.9292	-59.3775	-57.3955	-60.8386	-58.7366	-58.4703	-59.3611
346	-70.7899	-64.8471	-59.3447	-57.3331	-60.8747	-58.799	-58.5854	-59.4893
347	-70.8721	-64.9555	-59.4203	-57.2739	-60.8813	-58.7957	-58.5394	-59.3414
348	-70.8589	-64.8766	-59.4597	-57.2607	-60.9438	-58.8155	-58.6248	-59.3907
349	-70.8918	-64.8076	-59.4433	-57.1851	-60.9372	-58.7793	-58.5525	-59.417
350	-70.8754	-64.8372	-59.4893	-57.1227	-60.7991	-58.6577	-58.4999	-59.3447
351	-70.9641	-64.7813	-59.5748	-57.0537	-60.7564	-58.799	-58.4769	-59.3545
352	-70.9444	-64.8438	-59.5748	-57.0372	-60.7696	-58.6939	-58.4966	-59.3282
353	-71.0496	-64.8997	-59.6339	-57.1194	-60.8747	-58.7596	-58.5492	-59.371
354	-71.0003	-64.755	-59.5879	-57.0372	-60.6677	-58.7103	-58.4835	-59.3677
355	-70.9313	-64.8766	-59.726	-57.0076	-60.7466	-58.5887	-58.5229	-59.2592
356	-71.0266	-64.8339	-59.6471	-57.0241	-60.7203	-58.6314	-58.5361	-59.371
357	-71.1285	-64.8273	-59.749	-56.9748	-60.6775	-58.6248	-58.4802	-59.3085
358	-71.1679	-64.8503	-59.6898	-56.9813	-60.717	-58.6807	-58.4736	-59.3775
359	-71.0627	-64.8602	-59.818	-56.9485	-60.7564	-58.6511	-58.4638	-59.4203
360	-71.1449	-64.8405	-59.795	-56.9846	-60.8452	-58.6971	-58.4473	-59.3414
361	-71.2041	-64.7912	-59.9298	-56.9485	-60.8978	-58.6215	-58.5558	-59.3677
362	-71.1219	-64.9062	-59.887	-56.9813	-60.878	-58.592	-58.4999	-59.3315
363	-71.2238	-64.7189	-60.0218	-57.0175	-60.8123	-58.6774	-58.4638	-59.2592
364	-71.1876	-64.8109	-60.0021	-57.0504	-60.7696	-58.6708	-58.3684	-59.3217
365	-71.1581	-64.7583	-59.933	-57.0701	-60.8386	-58.6774	-58.4638	-59.2165
366	-71.1745	-64.7945	-59.9791	-57.0175	-60.8879	-58.6873	-58.4539	-59.2921
367	-71.2172	-64.8273	-60.0777	-57.0537	-61.0259	-58.6544	-58.4638	-59.2592
368	-71.237	-64.7649	-60.0086	-57.1753	-60.9734	-58.6577	-58.5032	-59.2494
369	-71.1515	-64.8536	-60.1237	-57.1293	-61.0851	-58.5722	-58.4999	-59.3315
370	-71.1416	-64.8997	-60.1303	-57.1391	-61.0259	-58.6511	-58.5196	-59.2789
371	-71.1022	-64.8471	-60.1335	-57.2377	-60.9799	-58.5295	-58.615	-59.2921
372	-70.9543	-64.8208	-60.0316	-57.1687	-61.0259	-58.6413	-58.5164	-59.3052
373	-70.8622	-64.8832	-59.9889	-57.2081	-60.9668	-58.6445	-58.638	-59.2921
374	-70.8918	-64.9128	-59.9889	-57.3298	-60.8879	-58.5755	-58.5657	-59.1705
375	-70.7439	-64.8273	-60.0349	-57.3199	-60.8222	-58.6708	-58.5722	-59.3085
376	-70.6552	-64.8372	-59.9528	-57.3232	-60.7728	-58.6215	-58.5657	-59.2099
377	-70.527	-64.8569	-60.0382	-57.3265	-60.6808	-58.6281	-58.6117	-59.2198
378	-70.3922	-64.7846	-60.0481	-57.3988	-60.6972	-58.684	-58.5952	-59.3151
379	-70.356	-64.9259	-59.9363	-57.3593	-60.6381	-58.7004	-58.615	-59.325
380	-70.195	-64.9194	-59.9692	-57.2936	-60.5756	-58.6215	-58.5492	-59.2954
381	-70.1161	-64.9522	-59.8837	-57.3889	-60.5461	-58.6445	-58.5788	-59.3052
382	-70.1292	-65.041	-59.9298	-57.3166	-60.2962	-58.6117	-58.5196	-59.3052
383	-69.8926	-65.0048	-59.8509	-57.3824	-60.3291	-58.6314	-58.6347	-59.3052
384	-69.8433	-65.0344	-59.7588	-57.4612	-60.3784	-58.5492	-58.6478	-59.3808
385	-69.7907	-65.0311	-59.8673	-57.5105	-60.4047	-58.5328	-58.6643	-59.3578
386	-69.8926	-65.087	-59.8147	-57.4547	-60.4935	-58.615	-58.6544	-59.3381
387	-69.7808	-65.0706	-59.8344	-57.5599	-60.5986	-58.7004	-58.6807	-59.3217
388	-69.7348	-65.0377	-59.6635	-57.5993	-60.7564	-58.5361	-58.5722	-59.2592
389	-69.6658	-65.0114	-59.8114	-57.642	-60.7235	-58.6248	-58.638	-59.371
390	-69.5211	-65.0443	-59.749	-57.619	-60.6874	-58.6248	-58.6544	-59.3282
391	-69.4817	-65.0311	-59.6799	-57.7045	-60.6282	-58.5887	-58.6051	-59.3151
392	-69.4784	-64.9818	-59.6997	-57.7604	-60.671	-58.5887	-58.638	-59.2921
393	-69.3601	-65.0837	-59.7391	-57.8294	-60.717	-58.6281	-58.6183	-59.348
394	-69.3272	-65.0936	-59.6241	-57.8885	-60.6644	-58.6478	-58.5657	-59.3151
395	-69.2976	-64.9555	-59.6175	-57.8754	-60.6578	-58.6478	-58.5952	-59.325
396	-69.2582	-65.0213	-59.4729	-57.928	-60.5855	-58.684	-58.5821	-59.348
397	-69.2713	-64.9785	-59.5748	-57.997	-60.4014	-58.6183	-58.5525	-59.3874
398	-69.1431	-65.0015	-59.5254	-57.9313	-60.3981	-58.592	-58.5459	-59.4597
399	-69.1103	-64.949	-59.509	-57.974	-60.431	-58.6478	-58.6314	-59.3907
400	-69.1366	-64.9687	-59.5616	-58.043	-60.3193	-58.6676	-58.6544	-59.3677
401	-69.0643	-64.8438	-59.4301	-57.9773	-60.4836	-58.6478	-58.5065	-59.4104
402	-69.0544	-64.7715	-59.4926	-58.1712	-60.4211	-58.6807	-58.5952	-59.4564
403	-69.038	-64.7715	-59.555	-58.1055	-60.385	-58.6478	-58.6873	-59.4663
404	-69.084	-64.8043	-59.532	-58.2435	-60.4803	-58.684	-58.5525	-59.4071
405	-69.061	-64.709	-59.4992	-58.1351	-60.362	-58.7004	-58.5525	-59.5123
406	-69.084	-64.6268	-59.3348	-58.2008	-60.3554	-58.7201	-58.5196	-59.4597
407	-69.0051	-64.6926	-59.3775	-58.0496	-60.5198	-58.707	-58.4868	-59.4433
408	-68.9821	-64.6696	-59.3578	-58.0463	-60.431	-58.7037	-58.4868	-59.532
409	-68.9492	-64.5512	-59.4827	-57.9379	-60.5362	-58.6643	-58.5394	-59.4433
410	-68.8703	-64.6367	-59.5978	-57.905	-60.6447	-58.6215	-58.4802	-59.4499
411	-68.9558	-64.571	-59.5419	-57.8031	-60.7696	-58.7366	-58.4769	-59.532
412	-68.9393	-64.5578	-59.555	-57.859	-60.7827	-58.6577	-58.5525	-59.5353
413	-68.9426	-64.5381	-59.6109	-57.8721	-60.6512	-58.6873	-58.5361	-59.5386
414	-68.8637	-64.4855	-59.6274	-57.7834	-60.8156	-58.7464	-58.5558	-59.5156
415	-68.8999	-64.4625	-59.532	-57.7538	-60.7597	-58.8385	-58.5657	-59.4696
416	-68.8605	-64.3639	-59.5945	-57.7308	-60.7071	-58.7103	-58.4736	-59.6602
417	-68.844	-64.2981	-59.6668	-57.711	-60.5822	-58.7957	-58.5262	-59.5813
418	-68.867	-64.1568	-59.6767	-57.6157	-60.5395	-58.6971	-58.5492	-59.5583
419	-68.9229	-64.1075	-59.6274	-57.6486	-60.5493	-58.7727	-58.4079	-59.6274
420	-68.8177	-64.0056	-59.6701	-57.5434	-60.4639	-58.7366	-58.5328	-59.6208
421	-68.8605	-63.9234	-59.7358	-57.5171	-60.362	-58.7497	-58.4375	-59.6931
422	-68.7586	-63.8577	-59.795	-57.504	-60.2831	-58.6971	-58.4934	-59.6175
423	-68.7323	-63.7854	-59.7621	-57.4317	-60.3521	-58.7464	-58.4999	-59.7917
424	-68.7586	-63.7689	-59.8443	-57.2279	-60.4474	-58.8418	-58.4243	-59.7292
425	-68.7684	-63.6572	-59.864	-57.2114	-60.3718	-58.8845	-58.3882	-59.6898
426	-68.6567	-63.575	-59.9067	-57.2114	-60.3784	-58.8056	-58.3783	-59.841
427	-68.6862	-63.6046	-60.0086	-57.1687	-60.316	-58.8582	-58.4243	-59.5912
428	-68.6731	-63.5093	-60.0678	-57.1621	-60.4047	-58.8418	-58.3684	-59.7325
429	-68.7421	-63.4238	-59.9166	-57.1424	-60.4442	-58.7892	-58.4276	-59.7588
430	-68.6106	-63.4304	-60.1861	-57.1786	-60.5165	-58.7563	-58.2896	-59.8016
431	-68.6337	-63.3745	-60.1401	-57.1588	-60.4967	-58.8385	-58.2665	-59.7818
432	-68.6534	-63.2989	-60.2157	-57.0734	-60.523	-58.8023	-58.3684	-59.6898
433	-68.6271	-63.2923	-60.2157	-57.0175	-60.5461	-58.8681	-58.3093	-59.887
434	-68.5876	-63.2332	-60.2453	-56.9189	-60.694	-58.8056	-58.3191	-59.795
435	-68.5942	-63.2594	-60.2716	-57.0701	-60.7005	-58.6971	-58.3553	-59.8509
436	-68.6106	-63.0524	-60.2716	-57.0241	-60.8945	-58.776	-58.3914	-59.9035
437	-68.6041	-62.9636	-60.3078	-56.9551	-60.9734	-58.6708	-58.3421	-59.8936
438	-68.4825	-62.9833	-60.3801	-56.9715	-61.0851	-58.6117	-58.3914	-59.9265
439	-68.6074	-62.8814	-60.3406	-57.0274	-61.0062	-58.6807	-58.3323	-59.8476
440	-68.5186	-62.8091	-60.3801	-57.1358	-60.9898	-58.7464	-58.3356	-59.8147
441	-68.4857	-62.7631	-60.3275	-57.0734	-61.1114	-58.7399	-58.375	-59.9298
442	-68.4595	-62.5692	-60.4031	-57.1095	-60.9964	-58.7925	-58.4112	-59.9889
443	-68.5679	-62.579	-60.2979	-57.1556	-61.095	-58.776	-58.3027	-59.9659
444	-68.6534	-62.4673	-60.2847	-57.2147	-61.1574	-58.6347	-58.3454	-60.0908
445	-68.6139	-62.349	-60.3669	-57.241	-61.0983	-58.7464	-58.283	-60.0218
446	-68.4299	-62.2602	-60.3373	-57.2344	-61.2133	-58.6971	-58.2961	-59.9889
447	-68.4529	-62.0893	-60.2716	-57.3593	-61.3382	-58.6939	-58.3454	-60.0086
448	-68.4364	-61.9841	-60.3373	-57.2706	-61.4105	-58.7267	-58.306	-60.0218
449	-68.4299	-61.7606	-60.3571	-57.149	-61.473	-58.7333	-58.3882	-60.0152
450	-68.3937	-61.6455	-60.3603	-57.1654	-61.4828	-58.7136	-58.352	-59.91
451	-68.3214	-61.376	-60.4228	-57.1884	-61.3744	-58.6413	-58.3914	-59.9889
452	-68.1768	-61.1821	-60.4787	-57.0898	-61.1574	-58.7366	-58.3586	-59.9495
453	-68.088	-61.0473	-60.3965	-57.172	-61.2396	-58.6774	-58.3619	-60.0218
454	-68.0551	-60.883	-60.3834	-57.1687	-61.4039	-58.7694	-58.26	-59.9889
455	-67.9763	-60.5346	-60.4228	-57.08	-61.2988	-58.7694	-58.2764	-60.0678
456	-67.7462	-60.3636	-60.3932	-56.8663	-61.3152	-58.7103	-58.2731	-60.081
457	-67.6969	-60.173	-60.4162	-56.8959	-61.3218	-58.7037	-58.2698	-60.1237
458	-67.5292	-60.0119	-60.4458	-56.8006	-61.2264	-58.6577	-58.3027	-60.1566
459	-67.3287	-59.8016	-60.3538	-56.6592	-61.2297	-58.6248	-58.2534	-60.1894
460	-67.217	-59.6208	-60.4031	-56.5738	-61.1771	-58.6741	-58.2961	-60.1401
461	-67.0099	-59.3118	-60.4031	-56.4883	-61.3908	-58.7333	-58.3421	-60.1303
462	-66.931	-59.1179	-60.288	-56.4653	-61.4105	-58.661	-58.2567	-60.0875
463	-66.7634	-58.8911	-60.2913	-56.3305	-61.4204	-58.6643	-58.26	-60.0842
464	-66.4774	-58.6347	-60.2026	-56.2582	-61.5321	-58.6676	-58.2172	-60.0777
465	-66.3919	-58.6807	-60.2059	-56.153	-61.5716	-58.7497	-58.2271	-60.104
466	-66.2112	-58.421	-60.127	-56.0281	-61.519	-58.7892	-58.2041	-60.1533
467	-66.0435	-58.3224	-60.0481	-56.0051	-61.4861	-58.7333	-58.1482	-60.1237
468	-65.8726	-58.1712	-59.9298	-56.0018	-61.5387	-58.7694	-58.1811	-60.2552
469	-65.7477	-58.0365	-59.8837	-55.8243	-61.5256	-58.6314	-58.2238	-60.2913
470	-65.6425	-57.9083	-59.8903	-55.775	-61.5551	-58.7464	-58.2764	-60.2946
471	-65.4814	-57.8228	-59.818	-55.7553	-61.4532	-58.7563	-58.2337	-60.1763
472	-65.2678	-57.7932	-59.749	-55.6896	-61.496	-58.6971	-58.1942	-60.1993
473	-65.1133	-57.7275	-59.7654	-55.6337	-61.3711	-58.6478	-58.1679	-60.3012
474	-65.1429	-57.6289	-59.6602	-55.5778	-61.2757	-58.7563	-58.1581	-60.3571
475	-64.9259	-57.6913	-59.6339	-55.5844	-61.1739	-58.6544	-58.1482	-60.265
476	-64.7879	-57.6552	-59.5419	-55.6008	-61.095	-58.6873	-58.0956	-60.3012
477	-64.6531	-57.7078	-59.5156	-55.5482	-61.1213	-58.6281	-58.1614	-60.3143
478	-64.6038	-57.7505	-59.4827	-55.5515	-60.9503	-58.707	-57.9576	-60.3801
479	-64.4855	-57.7275	-59.4564	-55.5647	-60.9142	-58.8056	-58.0266	-60.3899
480	-64.3474	-57.7538	-59.3841	-55.6107	-60.8386	-58.661	-58.1482	-60.3571
481	-64.2554	-57.7439	-59.417	-55.6896	-60.8583	-58.7169	-58.0956	-60.3998
482	-64.2192	-57.8458	-59.5485	-55.7619	-61.0095	-58.6215	-58.0595	-60.4162
483	-64.1798	-57.8491	-59.4466	-55.775	-60.9273	-58.73	-58.1712	-60.3768
484	-63.9629	-57.9411	-59.5057	-55.7356	-60.9109	-58.7464	-58.1318	-60.4787
485	-63.8971	-57.8721	-59.4005	-55.8276	-60.9306	-58.7136	-58.0693	-60.4359
486	-63.8675	-58.0365	-59.5123	-55.821	-60.9273	-58.8023	-58.1482	-60.3932
487	-63.8314	-57.997	-59.4499	-55.9065	-61.0522	-58.7432	-58.1318	-60.5148
488	-63.7262	-58.0365	-59.4236	-55.9821	-60.9865	-58.7464	-58.1022	-60.5148
489	-63.6144	-58.1482	-59.4663	-56.0314	-60.9471	-58.8089	-58.2041	-60.4359
490	-63.4895	-58.3356	-59.3118	-56.1563	-60.9865	-58.7497	-58.1844	-60.5181
491	-63.3646	-58.2633	-59.417	-56.199	-60.9372	-58.799	-58.1975	-60.3899
492	-63.2233	-58.3684	-59.3808	-56.3108	-60.8715	-58.7497	-58.1351	-60.4261
493	-63.1543	-58.4966	-59.4992	-56.3963	-60.8583	-58.6741	-58.1449	-60.4524
494	-63.0261	-58.3882	-59.4071	-56.4061	-60.7038	-58.73	-58.2008	-60.4359
495	-62.9143	-58.4309	-59.44	-56.4719	-60.7926	-58.776	-58.1416	-60.4852
496	-62.8486	-58.5262	-59.4663	-56.5606	-60.7531	-58.6248	-58.02	-60.4195
497	-62.6809	-58.4901	-59.4597	-56.5902	-60.8222	-58.7629	-58.0562	-60.4655
498	-62.5396	-58.5032	-59.4466	-56.7282	-60.7301	-58.7957	-58.0003	-60.4195
499	-62.3358	-58.3586	-59.5024	-56.817	-60.7761	-58.73	-57.8984	-60.4655
500	-62.201	-58.3323	-59.5517	-56.9518	-60.7728	-58.6906	-57.9609	-60.4655
501	-62.132	-58.3323	-59.486	-56.9813	-60.7005	-58.6643	-57.8392	-60.3308
502	-61.9118	-58.3652	-59.5189	-57.0931	-60.74	-58.7201	-57.882	-60.6299
503	-61.7967	-58.3487	-59.6241	-57.0701	-60.6972	-58.7103	-57.8162	-60.4524
504	-61.6554	-58.4046	-59.5978	-57.1786	-60.7761	-58.6511	-57.7998	-60.5083
505	-61.3793	-58.2896	-59.6602	-57.3298	-60.7728	-58.6478	-57.7965	-60.4524
506	-61.4089	-58.3093	-59.6504	-57.4547	-60.8057	-58.6478	-57.7209	-60.5247
507	-61.215	-58.2928	-59.7292	-57.6453	-60.7597	-58.6774	-57.7275	-60.4688
508	-61.0539	-58.306	-59.6931	-57.7242	-60.7367	-58.6084	-57.7867	-60.5839
509	-60.9421	-58.3652	-59.7325	-57.7078	-60.7268	-58.753	-57.7702	-60.551
510	-60.8304	-58.3093	-59.8048	-57.8294	-60.7564	-58.6445	-57.813	-60.4688
511	-60.7581	-58.2238	-59.8574	-57.8787	-60.7235	-58.7432	-57.7768	-60.5608
512	-60.666	-58.2764	-59.9396	-57.9247	-60.8222	-58.6511	-57.8425	-60.5378
513	-60.4294	-58.1745	-60.0678	-58.0562	-60.7203	-58.6741	-57.905	-60.5641
514	-60.4228	-58.2172	-60.0678	-58.2074	-60.7104	-58.7333	-57.8294	-60.4491
515	-60.2979	-58.2041	-60.0284	-58.2172	-60.5954	-58.7103	-57.8097	-60.5247
516	-60.15	-58.1384	-60.0711	-58.306	-60.5986	-58.6939	-57.7209	-60.4688
517	-60.0612	-58.1482	-60.0711	-58.3783	-60.6118	-58.6971	-57.7505	-60.4754
518	-59.8969	-58.3126	-60.1467	-58.4835	-60.5362	-58.6774	-57.7439	-60.4852
519	-59.8048	-58.2172	-60.1368	-58.7267	-60.5855	-58.6807	-57.7669	-60.482
520	-59.703	-58.3158	-60.3209	-58.8319	-60.5198	-58.6183	-57.7735	-60.5214
521	-59.6175	-58.3191	-60.3045	-58.8746	-60.5592	-58.6018	-57.7275	-60.5214
522	-59.6339	-58.3882	-60.288	-58.9831	-60.5329	-58.5657	-57.5993	-60.4984
523	-59.4729	-58.283	-60.2913	-58.9765	-60.4277	-58.6807	-57.5697	-60.5017
524	-59.5485	-58.3158	-60.3735	-58.9437	-60.4836	-58.6018	-57.5927	-60.5313
525	-59.3841	-58.3553	-60.3406	-59.0686	-60.5756	-58.5328	-57.5993	-60.4984
526	-59.4433	-58.4835	-60.3636	-59.2099	-60.5395	-58.6084	-57.5007	-60.5444
527	-59.417	-58.5985	-60.3176	-59.2329	-60.5329	-58.6215	-57.5138	-60.5378
528	-59.2296	-58.5558	-60.3406	-59.3315	-60.5296	-58.6183	-57.4054	-60.5313
529	-59.3381	-58.6708	-60.3209	-59.4334	-60.3948	-58.5196	-57.4185	-60.4228
530	-59.3841	-58.8155	-60.2453	-59.44	-60.3324	-58.5459	-57.4087	-60.4162
531	-59.2954	-58.73	-60.2847	-59.5156	-60.2568	-58.5295	-57.3725	-60.4228
532	-59.2461	-58.9141	-60.3045	-59.6274	-60.3554	-58.4703	-57.3889	-60.4852
533	-59.2099	-58.8549	-60.3308	-59.6306	-60.2995	-58.4901	-57.481	-60.5115
534	-59.2461	-58.8976	-60.2387	-59.7753	-60.2962	-58.4572	-57.241	-60.4655
535	-59.2362	-59.062	-60.2453	-59.749	-60.4146	-58.5985	-57.2805	-60.4787
536	-59.2559	-59.0587	-60.2584	-59.8541	-60.4146	-58.6478	-57.2509	-60.5313
537	-59.3019	-59.1474	-60.1105	-59.9035	-60.3094	-58.5065	-57.1293	-60.4294
538	-59.3447	-59.2066	-60.173	-59.9988	-60.4474	-58.5394	-57.0964	-60.5148
539	-59.2132	-59.2231	-60.1335	-60.0086	-60.4606	-58.5295	-57.1457	-60.4721
540	-59.2099	-59.3512	-60.0415	-60.1105	-60.5921	-58.5558	-57.08	-60.5444
541	-59.3184	-59.4433	-60.0875	-60.1171	-60.5954	-58.5558	-56.9715	-60.6036
542	-59.2987	-59.4893	-59.9955	-60.104	-60.6841	-58.5525	-56.8137	-60.551
543	-59.1935	-59.6274	-60.0448	-60.1828	-60.7531	-58.5427	-56.9255	-60.5214
544	-59.2822	-59.6832	-60.0316	-60.1335	-60.8419	-58.5657	-56.8827	-60.6266
545	-59.2822	-59.6701	-60.0612	-60.2453	-60.8616	-58.5558	-56.8104	-60.5313
546	-59.4005	-59.7523	-60.0316	-60.265	-60.832	-58.6413	-56.7611	-60.5707
547	-59.3414	-59.8377	-59.9988	-60.2815	-60.8386	-58.6314	-56.9682	-60.5543
548	-59.4071	-59.8969	-59.9725	-60.3768	-60.6972	-58.6314	-56.8236	-60.6595
549	-59.5287	-60.0119	-59.9955	-60.4031	-60.7761	-58.5525	-56.8926	-60.6167
550	-59.5452	-60.0054	-59.9396	-60.5346	-60.8287	-58.5065	-56.9813	-60.6463
551	-59.5879	-60.0448	-59.9133	-60.551	-60.9471	-58.5591	-57.0339	-60.5576
552	-59.5715	-59.9922	-59.8509	-60.5576	-60.9865	-58.5065	-57.08	-60.5411
553	-59.6898	-60.0908	-59.8509	-60.5839	-61.1114	-58.5821	-57.08	-60.4951
554	-59.6142	-60.1237	-59.9232	-60.5477	-61.1114	-58.5361	-57.1523	-60.6397
555	-59.8048	-60.0744	-59.8081	-60.5904	-61.1936	-58.569	-57.1556	-60.5444
556	-59.8048	-59.9495	-59.933	-60.5937	-61.2692	-58.5459	-57.2147	-60.5313
557	-59.8739	-60.0086	-59.9889	-60.7022	-61.2396	-58.5722	-57.1588	-60.5773
558	-60.0218	-59.8246	-59.9232	-60.8337	-61.2889	-58.6511	-57.195	-60.4984
559	-60.0021	-59.7325	-59.9791	-60.7252	-61.2626	-58.7004	-57.1424	-60.5674
560	-60.0941	-59.7457	-59.9955	-60.7778	-61.2955	-58.6445	-57.3002	-60.5346
561	-60.1072	-59.5419	-60.0481	-60.7449	-61.1508	-58.5952	-57.241	-60.6036
562	-60.1401	-59.5189	-60.0349	-60.8468	-61.0029	-58.6445	-57.1687	-60.6003
563	-60.1237	-59.5189	-59.9823	-60.8435	-61.0029	-58.6051	-57.2081	-60.5608
564	-60.1993	-59.486	-59.9988	-60.8764	-60.8057	-58.5821	-57.2279	-60.482
565	-60.311	-59.4236	-59.9988	-60.8435	-60.8419	-58.5328	-57.3232	-60.5115
566	-60.4294	-59.3447	-60.0021	-60.9783	-60.9931	-58.6281	-57.218	-60.5247
567	-60.3866	-59.4334	-60.0349	-60.9257	-61.0588	-58.6281	-57.3331	-60.4885
568	-60.459	-59.3512	-60.0612	-60.9849	-61.1048	-58.707	-57.287	-60.482
569	-60.4918	-59.3217	-60.0218	-61.1361	-61.0818	-58.6774	-57.2969	-60.505
570	-60.4852	-59.2921	-60.0218	-61.0605	-61.1607	-58.6117	-57.4087	-60.4392
571	-60.6332	-59.2526	-60.0382	-61.0868	-61.1278	-58.5887	-57.4842	-60.528
572	-60.7351	-59.2954	-60.127	-61.2215	-61.2034	-58.5722	-57.4087	-60.4294
573	-60.8107	-59.2461	-60.0579	-61.1821	-61.3678	-58.5591	-57.4251	-60.4688
574	-60.9126	-59.2526	-60.127	-61.1985	-61.5453	-58.6215	-57.4021	-60.5773
575	-60.7581	-59.2691	-60.0448	-61.3004	-61.3974	-58.5821	-57.3561	-60.5017
576	-60.9323	-59.2395	-60.1204	-61.2314	-61.473	-58.6544	-57.3462	-60.6332
577	-60.9323	-59.2691	-60.0678	-61.2873	-61.4631	-58.615	-57.3889	-60.5148
578	-60.8698	-59.2263	-60.0875	-61.1689	-61.6242	-58.6051	-57.3758	-60.4918
579	-60.8764	-59.2888	-60.0645	-61.3037	-61.519	-58.5788	-57.4054	-60.5608
580	-60.9356	-59.3611	-60.1533	-61.3957	-61.6242	-58.6445	-57.3626	-60.5477
581	-60.975	-59.2625	-60.0974	-61.3629	-61.6965	-58.6117	-57.3561	-60.5444
582	-60.9224	-59.3874	-60.0842	-61.4319	-61.6307	-58.73	-57.4119	-60.5214
583	-61.0539	-59.417	-59.9265	-61.422	-61.519	-58.6873	-57.4119	-60.4918
584	-61.0342	-59.3611	-59.9823	-61.5535	-61.565	-58.7004	-57.4678	-60.5247
585	-61.0112	-59.3874	-60.0054	-61.5469	-61.5157	-58.592	-57.3824	-60.5411
586	-60.9619	-59.4794	-60.1171	-61.6028	-61.5321	-58.7267	-57.4382	-60.551
587	-60.975	-59.5978	-59.9659	-61.6751	-61.3251	-58.6741	-57.4448	-60.5115
588	-61.1755	-59.5485	-60.0612	-61.5009	-61.5157	-58.6577	-57.3856	-60.5444
589	-61.1394	-59.5715	-59.9002	-61.5667	-61.3053	-58.7432	-57.3528	-60.4721
590	-61.1361	-59.4466	-59.9133	-61.5469	-61.2823	-58.7201	-57.4382	-60.5313
591	-61.1098	-59.5813	-59.9232	-61.5667	-61.3349	-58.6413	-57.3593	-60.551
592	-61.215	-59.6043	-59.9067	-61.5272	-61.2396	-58.8155	-57.4021	-60.505
593	-61.1821	-59.6405	-59.8476	-61.5864	-61.1804	-58.7563	-57.3298	-60.5608
594	-61.261	-59.6668	-59.7983	-61.6948	-61.2297	-58.8023	-57.3824	-60.5477
595	-61.1854	-59.6306	-59.7325	-61.7047	-61.3185	-58.7432	-57.4218	-60.6134
596	-61.2511	-59.7818	-59.749	-61.5995	-61.4467	-58.707	-57.4514	-60.5444
597	-61.2347	-59.6865	-59.6471	-61.7146	-61.4664	-58.6676	-57.4382	-60.5641
598	-61.1788	-59.6504	-59.8081	-61.6488	-61.4894	-58.6478	-57.4317	-60.4228
599	-61.1295	-59.6569	-59.7128	-61.7573	-61.4302	-58.6676	-57.4678	-60.505
600	-61.1985	-59.7457	-59.6504	-61.7737	-61.4368	-58.7662	-57.4678	-60.551
601	-61.261	-59.7621	-59.7128	-61.7836	-61.5354	-58.7169	-57.4612	-60.551
602	-61.2807	-59.6734	-59.7062	-61.8296	-61.3842	-58.7366	-57.481	-60.4688
603	-61.3497	-59.7523	-59.6931	-61.8691	-61.3086	-58.6741	-57.4875	-60.505
604	-61.2577	-59.7917	-59.5485	-61.9315	-61.3218	-58.7234	-57.458	-60.5937
605	-61.2675	-59.8344	-59.7227	-61.9414	-61.3152	-58.7399	-57.4284	-60.6167
606	-61.1722	-59.726	-59.7424	-61.8198	-61.1936	-58.7925	-57.5138	-60.528
607	-61.284	-59.7983	-59.6504	-61.8986	-61.4434	-58.7103	-57.5434	-60.6036
608	-61.2445	-59.818	-59.6241	-61.8428	-61.4993	-58.7267	-57.5599	-60.5346
609	-61.3201	-59.8903	-59.6043	-61.9611	-61.6242	-58.7662	-57.5171	-60.5608
610	-61.2675	-59.8772	-59.5748	-62.0104	-61.6636	-58.7826	-57.573	-60.5839
611	-61.3925	-59.933	-59.6668	-61.9644	-61.7228	-58.6971	-57.5073	-60.6233
612	-61.3004	-59.91	-59.6602	-61.9052	-61.7984	-58.8023	-57.5171	-60.574
613	-61.4023	-59.9593	-59.6734	-61.9315	-61.8214	-58.8746	-57.527	-60.5148
614	-61.2873	-59.9528	-59.5222	-62.0071	-61.5749	-58.7662	-57.4744	-60.5214
615	-61.1163	-59.9396	-59.6438	-61.9677	-61.5913	-58.7826	-57.4744	-60.5378
616	-61.261	-59.9035	-59.6701	-62.0729	-61.5716	-58.7333	-57.5599	-60.4951
617	-61.1887	-59.956	-59.6668	-62.1287	-61.5913	-58.8549	-57.5204	-60.5806
618	-61.2347	-59.8772	-59.7161	-62.1123	-61.6373	-58.7629	-57.4744	-60.4557
619	-61.2807	-59.9035	-59.7161	-62.2076	-61.6636	-58.7957	-57.5599	-60.5576
620	-61.1722	-59.9133	-59.726	-62.2832	-61.5979	-58.9108	-57.5599	-60.4524
621	-61.1788	-59.8673	-59.7325	-62.3194	-61.5058	-58.8483	-57.5401	-60.4622
622	-61.1689	-59.7917	-59.8607	-62.2997	-61.5288	-58.8451	-57.5401	-60.5378
623	-61.1525	-59.7917	-59.841	-62.2799	-61.6242	-58.8549	-57.5171	-60.5871
624	-61.1821	-59.7851	-59.887	-62.2997	-61.5321	-58.8286	-57.4842	-60.4951
625	-61.1689	-59.7227	-59.9035	-62.3522	-61.5025	-58.8286	-57.5303	-60.4458
626	-61.1821	-59.5978	-59.9692	-62.3785	-61.4434	-58.7366	-57.4251	-60.4392
627	-61.1689	-59.6536	-59.9659	-62.349	-61.4467	-58.7366	-57.504	-60.528
628	-61.1525	-59.5353	-60.0382	-62.464	-61.5288	-58.7793	-57.5401	-60.5247
629	-61.2117	-59.4762	-60.0678	-62.4213	-61.5223	-58.7333	-57.504	-60.3998
630	-61.1624	-59.4466	-60.0875	-62.4476	-61.496	-58.7563	-57.4974	-60.4491
631	-61.1919	-59.4334	-60.1105	-62.5593	-61.4927	-58.8089	-57.5336	-60.4327
632	-61.1821	-59.2954	-60.127	-62.5659	-61.5124	-58.8418	-57.5894	-60.4096
633	-61.1558	-59.2592	-60.2256	-62.4147	-61.5716	-58.7432	-57.5533	-60.4392
634	-61.2117	-59.2559	-60.2683	-62.4837	-61.5913	-58.7826	-57.4678	-60.4261
635	-61.2675	-59.2033	-60.2979	-62.5889	-61.7326	-58.7793	-57.5204	-60.4951
636	-61.2675	-59.2625	-60.334	-62.5363	-61.7885	-58.7169	-57.5204	-60.3373
637	-61.3399	-59.0718	-60.3899	-62.5297	-61.9233	-58.7793	-57.5631	-60.3801
638	-61.3826	-59.1935	-60.4096	-62.4772	-61.9397	-58.7366	-57.5763	-60.4327
639	-61.2675	-59.0949	-60.3998	-62.4509	-61.8181	-58.7859	-57.481	-60.4787
640	-61.4681	-59.1146	-60.4458	-62.4509	-61.7491	-58.8253	-57.5368	-60.3406
641	-61.5667	-59.085	-60.5017	-62.464	-61.7063	-58.73	-57.55	-60.4031
642	-61.6127	-59.0258	-60.5378	-62.4476	-61.7031	-58.7563	-57.6453	-60.482
643	-61.5831	-59.0061	-60.5247	-62.4837	-61.6307	-58.9009	-57.5336	-60.459
644	-61.639	-59.0061	-60.5576	-62.3654	-61.6965	-58.8648	-57.6486	-60.4129
645	-61.6981	-58.9798	-60.5937	-62.3325	-61.7524	-58.7793	-57.5631	-60.4064
646	-61.7014	-59.0028	-60.6956	-62.2536	-61.68	-58.8089	-57.619	-60.334
647	-61.6324	-59.0423	-60.8008	-62.2766	-61.5617	-58.7201	-57.5796	-60.4031
648	-61.8066	-59.0225	-60.7679	-62.3029	-61.6012	-58.6774	-57.4251	-60.4096
649	-61.7277	-59.0061	-60.9849	-62.2273	-61.6373	-58.7399	-57.3495	-60.3439
650	-61.9085	-58.8483	-60.9914	-62.2043	-61.6866	-58.7234	-57.3856	-60.3735
651	-61.8756	-58.9272	-61.0835	-62.2799	-61.7096	-58.7727	-57.4021	-60.3406
652	-61.9282	-58.8746	-61.2117	-62.2504	-61.8247	-58.7957	-57.3791	-60.3176
653	-61.9611	-58.8056	-61.1854	-62.2273	-61.6538	-58.7037	-57.4119	-60.2223
654	-62.0367	-58.7596	-61.3234	-62.201	-61.7261	-58.7366	-57.3495	-60.3242
655	-62.0794	-58.7333	-61.4122	-62.132	-61.6538	-58.7399	-57.2805	-60.2617
656	-62.2471	-58.7892	-61.4615	-62.1748	-61.5518	-58.6577	-57.1621	-60.3176
657	-62.3062	-58.6774	-61.399	-62.1057	-61.473	-58.7432	-57.1063	-60.3045
658	-62.3095	-58.6676	-61.5042	-62.0531	-61.45	-58.8122	-57.1818	-60.3538
659	-62.3851	-58.638	-61.5108	-62.0466	-61.3185	-58.7629	-57.241	-60.2453
660	-62.3917	-58.6084	-61.6751	-62.0038	-61.2363	-58.7201	-57.1687	-60.3012
661	-62.5002	-58.6281	-61.7474	-62.04	-60.9734	-58.753	-57.287	-60.2617
662	-62.5856	-58.5459	-61.731	-62.0531	-61.0424	-58.6708	-57.1687	-60.2847
663	-62.6349	-58.5887	-61.8428	-62.0367	-61.0095	-58.73	-57.2607	-60.2683
664	-62.6448	-58.5032	-61.8592	-61.8921	-60.9536	-58.6445	-57.3725	-60.3242
665	-62.7401	-58.4375	-61.9217	-61.9808	-61.1311	-58.6741	-57.3133	-60.1697
666	-62.796	-58.4375	-62.086	-62.0663	-60.9372	-58.7925	-57.3955	-60.2847
667	-62.7007	-58.4572	-62.0268	-62.0761	-61.0654	-58.6708	-57.504	-60.2552
668	-62.8782	-58.4079	-62.1485	-62.0761	-61.0259	-58.6183	-57.5303	-60.1763
669	-62.8847	-58.3717	-62.201	-62.178	-61.1344	-58.7169	-57.4021	-60.2091
670	-62.9998	-58.5131	-62.2405	-62.155	-61.0884	-58.7004	-57.4941	-60.2683
671	-63.0359	-58.4868	-62.3161	-62.1123	-61.0851	-58.7037	-57.4842	-60.3275
672	-63.0721	-58.3849	-62.3325	-62.1649	-61.1936	-58.661	-57.3922	-60.2749
673	-63.0458	-58.444	-62.395	-62.1649	-61.1278	-58.7136	-57.5073	-60.2683
674	-63.1839	-58.4802	-62.3917	-62.086	-61.2034	-58.7432	-57.481	-60.1861
675	-63.1247	-58.5196	-62.4739	-62.1156	-61.1541	-58.6314	-57.5007	-60.3078
676	-63.1904	-58.5394	-62.5922	-62.2109	-61.2264	-58.5295	-57.5631	-60.1631
677	-63.2726	-58.5361	-62.6316	-62.3851	-61.2199	-58.592	-57.6026	-60.1533
678	-63.243	-58.5229	-62.7072	-62.178	-61.3218	-58.6183	-57.5697	-60.1796
679	-63.3252	-58.5525	-62.6152	-62.2832	-61.45	-58.6807	-57.5533	-60.173
680	-63.3318	-58.6577	-62.6448	-62.1189	-61.5091	-58.5788	-57.5138	-60.1138
681	-63.3712	-58.7136	-62.7631	-62.0794	-61.3218	-58.592	-57.5927	-60.2124
682	-63.3383	-58.8188	-62.7763	-62.2471	-61.3711	-58.5985	-57.5467	-60.1664
683	-63.3383	-58.8483	-62.888	-62.2372	-61.4269	-58.6248	-57.5829	-60.1434
684	-63.3252	-58.8615	-62.888	-62.2635	-61.611	-58.6347	-57.6256	-60.1171
685	-63.3252	-58.9502	-62.9669	-62.2668	-61.4697	-58.7399	-57.665	-60.0974
686	-63.3482	-58.9075	-62.9603	-62.1715	-61.6044	-58.5887	-57.6091	-60.0842
687	-63.266	-59.0357	-63.0918	-62.1485	-61.5354	-58.5722	-57.5664	-60.1467
688	-63.2332	-59.0883	-63.1773	-62.0761	-61.7622	-58.6051	-57.6716	-60.1303
689	-63.2266	-59.1113	-63.0852	-62.1452	-61.7261	-58.6741	-57.5796	-60.0711
690	-63.2726	-59.1507	-63.151	-62.1649	-61.6439	-58.661	-57.6979	-60.1072
691	-63.3285	-59.2099	-63.1937	-62.1386	-61.6439	-58.592	-57.6749	-60.196
692	-63.4172	-59.2329	-63.2167	-62.1123	-61.6636	-58.5591	-57.7965	-60.196
693	-63.4304	-59.2822	-63.1937	-62.1156	-61.7392	-58.5131	-57.6519	-60.1927
694	-63.3745	-59.3545	-63.2233	-62.1254	-61.7524	-58.5361	-57.7308	-60.104
695	-63.4106	-59.5057	-63.4238	-62.0761	-61.6505	-58.6577	-57.6913	-60.0941
696	-63.4041	-59.5353	-63.3646	-62.1419	-61.6307	-58.5459	-57.7702	-59.9955
697	-63.483	-59.5254	-63.4106	-62.1024	-61.4763	-58.5887	-57.7571	-60.0777
698	-63.4764	-59.5912	-63.4074	-62.063	-61.4467	-58.6183	-57.7571	-60.1861
699	-63.5816	-59.532	-63.4863	-62.0367	-61.3086	-58.5821	-57.8721	-60.1631
700	-63.5651	-59.6997	-63.4435	-62.1813	-61.1903	-58.4703	-57.7834	-60.081
701	-63.5619	-59.7621	-63.529	-62.1583	-61.0457	-58.5755	-57.7176	-60.0645
702	-63.6966	-59.7194	-63.4238	-61.9973	-61.1706	-58.5032	-57.7768	-60.1434
703	-63.6112	-59.841	-63.5421	-61.9447	-61.072	-58.5427	-57.813	-60.0941
704	-63.6407	-59.8443	-63.5717	-62.04	-60.9701	-58.4966	-57.8885	-60.0842
705	-63.838	-60.0382	-63.667	-62.0235	-60.924	-58.5525	-57.8622	-60.1204
706	-63.815	-60.0086	-63.6769	-61.9677	-60.878	-58.4999	-57.997	-60.1828
707	-63.8051	-60.0711	-63.7065	-61.9151	-60.9898	-58.4671	-57.8688	-60.0711
708	-63.7525	-60.242	-63.7098	-61.8362	-61.0227	-58.4408	-57.8327	-60.127
709	-63.8347	-60.2289	-63.7722	-61.754	-61.0424	-58.5098	-57.7899	-60.127
710	-63.9957	-60.288	-63.8445	-61.6291	-60.9996	-58.569	-57.859	-60.0579
711	-63.999	-60.459	-63.9267	-61.5272	-60.9208	-58.4901	-57.9477	-60.0481
712	-64.0911	-60.3308	-63.8281	-61.5601	-60.8156	-58.5131	-57.8688	-60.196
713	-64.0976	-60.4852	-63.8314	-61.4681	-60.717	-58.4572	-57.9576	-60.2256
714	-64.0845	-60.4984	-63.9136	-61.3826	-60.5263	-58.4309	-58.0036	-60.2387
715	-64.0286	-60.4392	-63.8708	-61.3366	-60.3751	-58.4375	-57.8721	-60.1598
716	-64.0483	-60.4787	-63.9366	-61.2577	-60.2174	-58.4243	-57.9806	-60.1072
717	-64.1765	-60.6332	-63.861	-61.2215	-60.2897	-58.4309	-57.9346	-60.0908
718	-64.0615	-60.643	-63.907	-61.1558	-60.2897	-58.4999	-57.8951	-60.173
719	-64.0812	-60.7153	-63.9399	-61.1163	-60.3225	-58.5558	-57.9674	-59.9955
720	-64.1568	-60.7745	-63.9399	-61.1426	-60.2765	-58.5427	-57.9214	-60.127
721	-64.1305	-60.689	-64.0122	-61.0966	-60.2338	-58.4769	-58.0365	-60.1368
722	-64.1469	-60.8074	-63.9694	-61.0506	-60.316	-58.6051	-57.9477	-60.15
723	-64.1929	-60.7975	-63.907	-61.0407	-60.1812	-58.4539	-58.0529	-60.104
724	-64.0911	-60.9224	-63.9727	-61.0638	-60.3127	-58.444	-58.1055	-60.1007
725	-64.1962	-60.8895	-64.0122	-61.0473	-60.3258	-58.5098	-58.0233	-60.0678
726	-64.0713	-60.8468	-63.9267	-60.9882	-60.2239	-58.4112	-58.0595	-60.0645
727	-64.0911	-60.9553	-63.9201	-60.9914	-60.2469	-58.5131	-58.0233	-60.0415
728	-64.1042	-60.9487	-63.8905	-61.0375	-60.1483	-58.4309	-58.0562	-60.1138
729	-64.0549	-61.0112	-63.9201	-61.0572	-60.2371	-58.4605	-57.9641	-60.1434
730	-64.1009	-61.0473	-63.9234	-60.9257	-60.2667	-58.4934	-57.9707	-60.0448
731	-64.1634	-61.0342	-63.93	-61.0112	-60.2995	-58.5459	-58.0003	-60.0514
732	-64.1897	-61.0868	-63.9201	-60.9816	-60.2404	-58.5328	-58.0003	-60.0349
733	-64.0845	-61.0802	-64.0187	-60.8764	-60.1911	-58.4243	-57.997	-60.0875
734	-64.0713	-61.09	-64.0286	-60.8928	-60.2206	-58.398	-58.0036	-60.1138
735	-64.0713	-61.1295	-64.045	-60.86	-60.1023	-58.4408	-57.9904	-60.196
736	-64.0582	-61.1032	-64.0615	-60.906	-60.1319	-58.444	-57.9379	-60.0054
737	-63.9793	-61.1689	-64.1699	-60.929	-60.1155	-58.5591	-57.9904	-60.104
738	-63.9826	-61.2708	-64.0549	-60.9027	-60.1615	-58.5032	-57.9839	-60.1796
739	-63.9234	-61.1131	-64.1338	-60.837	-59.9051	-58.444	-58.0036	-60.196
740	-63.9431	-61.1328	-64.0943	-60.9158	-59.8065	-58.4638	-58.0003	-60.1467
741	-63.9694	-61.0933	-64.1272	-60.9487	-59.7276	-58.3947	-57.9083	-60.127
742	-63.8511	-61.0736	-64.0878	-60.8534	-59.6849	-58.4966	-57.9872	-60.0941
743	-63.8215	-61.1065	-64.0746	-60.9487	-59.583	-58.4276	-57.974	-60.1434
744	-63.8971	-61.0933	-64.2028	-60.8402	-59.675	-58.3947	-58.0529	-60.1631
745	-63.8708	-61.0539	-64.2981	-60.8304	-59.7342	-58.4539	-58.02	-60.0316
746	-63.9234	-60.9947	-64.2587	-60.8139	-59.8328	-58.5229	-58.0496	-60.1631
747	-63.9267	-60.9257	-64.1667	-60.7811	-59.7572	-58.4375	-58.043	-60.1138
748	-63.8708	-60.9783	-64.3113	-60.8435	-59.6816	-58.5065	-58.1252	-60.1335
749	-63.8018	-60.9816	-64.3672	-60.7942	-59.4351	-58.3421	-58.0299	-60.1204
750	-63.8807	-60.975	-64.3606	-60.837	-59.4416	-58.4835	-58.043	-60.1368
751	-63.7755	-60.9388	-64.4559	-60.8139	-59.2937	-58.4769	-58.1055	-60.1138
752	-63.838	-60.9323	-64.3902	-60.8895	-59.3759	-58.3717	-57.9214	-60.0941
753	-63.7393	-60.9553	-64.423	-60.7778	-59.3003	-58.4046	-58.0989	-60.1861
754	-63.9004	-60.9027	-64.5085	-60.7942	-59.3134	-58.4539	-58.0365	-60.0547
755	-63.8182	-60.8994	-64.5414	-60.8205	-59.1392	-58.4572	-58.0003	-60.1204
756	-63.7492	-60.9816	-64.5578	-60.9158	-59.0308	-58.4013	-58.043	-60.0875
757	-63.7229	-61.0572	-64.6926	-60.86	-58.9387	-58.3914	-58.0299	-60.1303
758	-63.6736	-61.09	-64.6005	-60.8074	-58.804	-58.4276	-58.1318	-60.0941
759	-63.6703	-61.0276	-64.6203	-60.8008	-59.0406	-58.4309	-58.1351	-60.1072
760	-63.7262	-61.0638	-64.6827	-60.929	-59.251	-58.3586	-58.0956	-60.1335
761	-63.6769	-61.021	-64.5545	-60.9684	-59.1918	-58.4243	-58.1088	-60.1697
762	-63.5816	-61.09	-64.6926	-60.9849	-59.3726	-58.4375	-58.2468	-60.1072
763	-63.7262	-61.2018	-64.7452	-60.9388	-59.4088	-58.4276	-58.1088	-60.0974
764	-63.7196	-61.215	-64.7978	-60.9717	-59.4811	-58.4966	-58.1219	-60.1796
765	-63.6375	-61.1525	-64.7715	-61.021	-59.514	-58.3882	-58.0332	-60.1105
766	-63.5881	-61.2248	-64.7912	-61.0473	-59.6224	-58.4506	-58.2435	-60.0514
767	-63.7032	-61.1919	-64.9621	-61.0079	-59.7013	-58.4539	-58.2271	-60.2256
768	-63.7887	-61.3333	-65.0771	-61.09	-59.6717	-58.4769	-58.1909	-60.196
769	-63.8445	-61.2938	-65.0344	-61.0868	-59.5928	-58.4966	-58.1909	-60.196
770	-63.8018	-61.2643	-65.133	-61.044	-59.6684	-58.5032	-58.1942	-60.1434
771	-63.7821	-61.238	-65.0969	-61.0375	-59.7539	-58.4703	-58.26	-60.1664
772	-63.7624	-61.3366	-65.1889	-61.0868	-59.8065	-58.5032	-58.2074	-60.15
773	-63.7558	-61.3333	-65.1002	-61.1525	-59.8065	-58.5887	-58.1548	-60.2453
774	-63.6736	-61.3892	-65.1692	-61.1821	-59.915	-58.375	-58.1416	-60.2946
775	-63.6407	-61.2938	-65.1988	-61.1525	-59.8952	-58.4342	-58.1515	-60.1007
776	-63.7788	-61.3826	-65.2382	-61.1657	-59.8657	-58.4835	-58.329	-60.1237
777	-63.7985	-61.3136	-65.3335	-61.1032	-59.9445	-58.4276	-58.2665	-60.2026
778	-63.667	-61.2544	-65.2941	-61.238	-59.8459	-58.5459	-58.3191	-60.15
779	-63.8281	-61.2412	-65.3138	-61.2774	-59.8394	-58.5558	-58.2698	-60.1664
780	-63.7032	-61.2478	-65.4058	-61.3234	-59.8426	-58.5952	-58.237	-60.2453
781	-63.7065	-61.1952	-65.3401	-61.3234	-59.7868	-58.5854	-58.2435	-60.2026
782	-63.6835	-61.2018	-65.465	-61.3793	-59.7572	-58.5427	-58.3093	-60.2091
783	-63.5619	-61.021	-65.4157	-61.4253	-59.8229	-58.6971	-58.26	-60.1664
784	-63.5388	-61.0572	-65.396	-61.4878	-59.9018	-58.7596	-58.2896	-60.2683
785	-63.506	-61.0868	-65.4124	-61.445	-59.8328	-58.661	-58.2764	-60.1467
786	-63.4369	-61.1295	-65.4584	-61.5765	-59.9347	-58.5755	-58.352	-60.1566
787	-63.4172	-61.1755	-65.5505	-61.5535	-59.8722	-58.6939	-58.3487	-60.1171
788	-63.3482	-61.1196	-65.5077	-61.6554	-60.0004	-58.7399	-58.4046	-60.2683
789	-63.3383	-61.1295	-65.6228	-61.6883	-60.1155	-58.6906	-58.2994	-60.1335
790	-63.3515	-61.1558	-65.5636	-61.5897	-60.0892	-58.6478	-58.3487	-60.1007
791	-63.3712	-61.1755	-65.6326	-61.7474	-60.0464	-58.6971	-58.3914	-60.2322
792	-63.2364	-61.1624	-65.7345	-61.7672	-60.1779	-58.6248	-58.306	-60.1303
793	-63.1378	-61.0802	-65.7247	-61.7606	-60.1812	-58.5328	-58.3652	-60.2157
794	-63.1082	-61.1755	-65.8496	-61.7442	-60.2239	-58.6215	-58.2994	-60.173
795	-63.1773	-61.1426	-65.8397	-61.7967	-60.0892	-58.5328	-58.3487	-60.242
796	-63.1904	-61.1887	-65.8364	-61.8559	-60.145	-58.5427	-58.306	-60.1072
797	-63.105	-61.0933	-66.0074	-61.8691	-60.122	-58.5361	-58.352	-60.2059
798	-63.0622	-61.1131	-65.9844	-61.8921	-60.1615	-58.6445	-58.3421	-60.2552
799	-63.0392	-61.1131	-66.083	-61.9479	-60.1713	-58.6347	-58.3454	-60.2091
800	-63.0359	-61.2018	-66.0435	-61.8921	-60.1187	-58.5459	-58.3454	-60.2749
801	-62.9768	-61.0999	-66.0567	-61.8888	-60.2436	-58.5854	-58.3586	-60.2387
802	-63.0392	-61.1821	-66.0961	-61.8296	-60.2042	-58.6084	-58.3652	-60.1927
803	-62.9406	-61.1755	-66.2243	-61.7836	-60.3225	-58.6741	-58.4572	-60.1697
804	-63.0326	-61.215	-66.1914	-61.823	-60.3948	-58.5722	-58.4408	-60.2617
805	-62.9801	-61.2971	-66.2966	-61.8526	-60.3488	-58.6544	-58.5722	-60.0875
806	-62.9373	-61.2478	-66.3065	-61.7409	-60.4672	-58.5887	-58.4342	-60.1894
807	-62.9932	-61.2577	-66.3722	-61.7672	-60.5658	-58.5427	-58.4408	-60.2354
808	-63.0392	-61.2774	-66.3952	-61.7343	-60.6512	-58.4769	-58.4901	-60.2815
809	-63.0721	-61.3201	-66.4018	-61.6357	-60.7564	-58.5229	-58.5131	-60.2223
810	-62.9373	-61.3957	-66.4314	-61.6225	-60.9931	-58.4243	-58.4638	-60.1993
811	-62.9899	-61.3234	-66.5004	-61.685	-61.0358	-58.4539	-58.4966	-60.2026
812	-62.9932	-61.3004	-66.5168	-61.5831	-61.0424	-58.4835	-58.5492	-60.2354
813	-62.9603	-61.4286	-66.5366	-61.6357	-61.1706	-58.5065	-58.5262	-60.3308
814	-63.0096	-61.3366	-66.5859	-61.5601	-61.1081	-58.5295	-58.5722	-60.3439
815	-63.0195	-61.3596	-66.5563	-61.5338	-60.9931	-58.4309	-58.6183	-60.3176
816	-62.9505	-61.2643	-66.6187	-61.5831	-61.1081	-58.4177	-58.615	-60.3899
817	-63.0031	-61.3957	-66.6549	-61.5371	-61.1081	-58.4572	-58.7169	-60.3538
818	-63.0195	-61.3892	-66.7502	-61.5732	-61.21	-58.5887	-58.6314	-60.3078
819	-62.9439	-61.4516	-66.7995	-61.4943	-61.3382	-58.4736	-58.5525	-60.2847
820	-63.0688	-61.4253	-66.9014	-61.5305	-61.3776	-58.4276	-58.5361	-60.3834
821	-62.9866	-61.4319	-66.8587	-61.4845	-61.5716	-58.4802	-58.6018	-60.3702
822	-62.9077	-61.307	-66.9705	-61.5009	-61.5979	-58.5131	-58.5755	-60.3603
823	-62.8321	-61.4188	-66.9474	-61.5305	-61.6932	-58.4408	-58.6478	-60.4984
824	-62.8354	-61.3037	-67.0428	-61.5535	-61.6603	-58.3487	-58.5722	-60.3669
825	-62.7533	-61.2511	-66.9672	-61.5305	-61.6307	-58.4605	-58.6873	-60.3669
826	-62.819	-61.2643	-67.0033	-61.6193	-61.7293	-58.2764	-58.6906	-60.4162
827	-62.75	-61.1887	-67.1052	-61.5568	-61.4532	-58.4079	-58.6544	-60.3735
828	-62.6481	-61.1985	-67.1907	-61.5667	-61.5486	-58.3389	-58.7925	-60.3636
829	-62.6415	-61.1854	-67.2235	-61.4681	-61.542	-58.3914	-58.7004	-60.3669
830	-62.6777	-61.1657	-67.24	-61.4878	-61.6702	-58.3126	-58.7366	-60.334
831	-62.5758	-61.2478	-67.3452	-61.5995	-61.7721	-58.3421	-58.7464	-60.3571
832	-62.5265	-61.1459	-67.3616	-61.5601	-61.7129	-58.3553	-58.73	-60.3308
833	-62.4903	-61.1755	-67.3616	-61.7836	-61.8477	-58.3356	-58.822	-60.3702
834	-62.464	-61.1887	-67.355	-61.7409	-61.8871	-58.3191	-58.7497	-60.3275
835	-62.4443	-61.1919	-67.4865	-61.7409	-61.8312	-58.2731	-58.7694	-60.3176
836	-62.2931	-61.1919	-67.4503	-61.7409	-61.9101	-58.3356	-58.8023	-60.2716
837	-62.2602	-61.2084	-67.4997	-61.7277	-61.874	-58.329	-58.8779	-60.2354
838	-62.201	-61.1854	-67.4799	-61.7474	-61.897	-58.2633	-58.8582	-60.2946
839	-62.178	-61.2051	-67.6509	-61.7507	-62.0383	-58.306	-58.7957	-60.173
840	-62.1813	-61.1426	-67.6311	-61.731	-62.1369	-58.2337	-58.8418	-60.104
841	-62.0433	-61.1229	-67.6048	-61.8395	-62.1271	-58.26	-58.822	-60.196
842	-62.017	-61.1657	-67.5983	-61.9118	-61.9989	-58.3421	-58.8319	-60.2519
843	-61.9381	-61.2314	-67.7133	-61.7705	-62.0054	-58.2731	-58.8812	-60.127
844	-61.9578	-61.1952	-67.756	-62.0137	-61.9167	-58.2961	-58.8944	-60.1763
845	-61.7803	-61.1854	-67.7264	-61.8888	-61.966	-58.2271	-58.9831	-60.2256
846	-61.708	-61.1394	-67.8218	-61.8789	-61.9036	-58.3224	-58.9568	-60.1566
847	-61.662	-61.2675	-67.8842	-61.9907	-61.9594	-58.2534	-58.9042	-60.2782
848	-61.5108	-61.1163	-67.9368	-62.0729	-61.9068	-58.3027	-59.0193	-60.2847
849	-61.3694	-61.0999	-68.019	-62.0794	-61.7392	-58.3093	-58.9502	-60.242
850	-61.3892	-61.1262	-68.0584	-62.1452	-61.8444	-58.2633	-58.9535	-60.1697
851	-61.2511	-61.0243	-68.0782	-62.1485	-61.897	-58.2008	-59.0653	-60.196
852	-61.1459	-61.021	-67.996	-62.1715	-61.8017	-58.1647	-58.9404	-60.288
853	-61.1262	-61.0966	-68.1077	-62.1616	-61.7392	-58.2961	-59.0488	-60.3143
854	-61.1098	-61.1098	-68.0486	-62.3029	-61.5979	-58.1811	-59.0587	-60.3078
855	-60.975	-61.09	-68.1538	-62.3292	-61.3974	-58.1614	-59.039	-60.2847
856	-60.9027	-61.1591	-68.0551	-62.4081	-61.1574	-58.2107	-59.0094	-60.3078
857	-60.7778	-61.1426	-68.0387	-62.4804	-60.8682	-58.214	-59.062	-60.2322
858	-60.6332	-61.2478	-68.1012	-62.487	-60.5921	-58.2304	-59.108	-60.1631
859	-60.5773	-61.2807	-68.1373	-62.5462	-60.3653	-58.1285	-59.0883	-60.2157
860	-60.574	-61.1919	-68.019	-62.5396	-60.1845	-58.2107	-59.1376	-60.1467
861	-60.5313	-61.2675	-68.0321	-62.6119	-60.1023	-58.214	-59.1507	-60.2782
862	-60.5378	-61.3366	-68.1012	-62.556	-60.0366	-58.214	-59.154	-60.2354
863	-60.5017	-61.4089	-68.0584	-62.6514	-59.9413	-58.1745	-59.1146	-60.2749
864	-60.4622	-61.3925	-68.0814	-62.7434	-59.9741	-58.1186	-59.1738	-60.2486
865	-60.3176	-61.3629	-68.0058	-62.7664	-59.8722	-58.1581	-59.1705	-60.1631
866	-60.2946	-61.4023	-68.019	-62.8387	-59.9511	-58.1121	-59.1968	-60.2519
867	-60.2617	-61.4352	-68.0091	-62.7828	-59.8328	-58.2271	-59.2559	-60.1237
868	-60.2716	-61.3464	-68.065	-62.9045	-59.8689	-58.1318	-59.177	-60.1828
869	-60.196	-61.5075	-68.0782	-62.9768	-59.8131	-58.1942	-59.1935	-60.1993
870	-60.0218	-61.4056	-67.8842	-62.9636	-59.8919	-58.1844	-59.2066	-60.1566
871	-60.0974	-61.2774	-68.0289	-63.0491	-59.8163	-58.1712	-59.2329	-60.1007
872	-60.0218	-61.2281	-67.8711	-63.1411	-59.9084	-58.1647	-59.1902	-60.1697
873	-60.0251	-61.2347	-67.9368	-63.1247	-59.9478	-58.1351	-59.2987	-60.1664
874	-59.9725	-61.1459	-67.9105	-63.1871	-59.9445	-58.0891	-59.2888	-60.1434
875	-60.0448	-61.1032	-67.9434	-63.1148	-59.8196	-58.0628	-59.2066	-60.1434
876	-60.0054	-61.0144	-67.9894	-63.1411	-59.9873	-58.1778	-59.1409	-60.0842
877	-59.9955	-60.8337	-68.0289	-63.2069	-59.9643	-58.1088	-59.2362	-60.0711
878	-60.1763	-60.6923	-67.8349	-63.2529	-59.8919	-58.1548	-59.1968	-60.0547
879	-60.1368	-60.6726	-67.8809	-63.3844	-60.0168	-58.0759	-59.2263	-60.1138
880	-60.127	-60.4688	-68.0223	-63.2956	-60.0267	-58.0726	-59.325	-60.0382
881	-60.0711	-60.4162	-67.9434	-63.4139	-59.9708	-58.1055	-59.3315	-60.0152
882	-60.1072	-60.1796	-67.9467	-63.4468	-60.0957	-58.0923	-59.4137	-60.0382
883	-60.0645	-60.0842	-68.0058	-63.46	-60.0201	-58.0562	-59.417	-59.9856
884	-60.1467	-59.9758	-67.973	-63.5586	-60.2009	-57.9576	-59.3447	-59.9692
885	-60.1927	-59.8377	-67.9434	-63.5553	-60.3094	-57.9674	-59.348	-59.9166
886	-60.2223	-59.6865	-67.9368	-63.6375	-60.4113	-58.0463	-59.3644	-60.0251
887	-60.1368	-59.6438	-68.0091	-63.5487	-60.5526	-58.0759	-59.3282	-59.9528
888	-60.1763	-59.4827	-67.973	-63.6276	-60.5165	-58.1121	-59.4268	-59.8903
889	-60.1434	-59.2921	-68.0486	-63.7492	-60.5526	-57.9839	-59.3118	-59.9823
890	-60.288	-59.1672	-67.9171	-63.7854	-60.6479	-58.0134	-59.2855	-59.8804
891	-60.3143	-59.0225	-67.9763	-63.7788	-60.7564	-58.02	-59.2756	-60.0251
892	-60.2617	-58.9897	-67.9434	-63.8708	-60.9438	-58.0858	-59.4038	-60.0251
893	-60.3209	-58.9239	-67.9368	-63.9727	-61.0818	-58.0102	-59.3019	-60.0054
894	-60.3439	-58.7925	-67.9401	-63.9234	-61.0062	-58.0266	-59.2691	-60.0875
895	-60.288	-58.7727	-67.8744	-63.8971	-61.1969	-57.997	-59.3512	-59.9823
896	-60.3603	-58.7267	-67.9697	-64.1108	-61.3086	-58.0102	-59.2526	-60.0842
897	-60.3078	-58.638	-67.9434	-64.1897	-61.3842	-58.0397	-59.3184	-59.9856
898	-60.2289	-58.5525	-67.9072	-64.1502	-61.3251	-58.0891	-59.3874	-59.9889
899	-60.4359	-58.6511	-67.8908	-64.1239	-61.3349	-57.9773	-59.2263	-60.0481
900	-60.4195	-58.5032	-67.9237	-64.2192	-61.2166	-57.9904	-59.2428	-59.9955
901	-60.5115	-58.5624	-67.9138	-64.1864	-61.1574	-57.9872	-59.2822	-60.0152
902	-60.528	-58.6117	-67.8218	-64.2225	-61.0654	-57.9313	-59.2724	-59.8936
903	-60.7055	-58.6676	-67.7823	-64.2981	-61.1706	-58.0693	-59.3217	-60.0514
904	-60.6923	-58.5952	-67.8415	-64.285	-61.233	-58.0332	-59.2263	-59.9988
905	-60.6956	-58.6544	-67.8481	-64.331	-61.2626	-57.997	-59.2954	-60.0152
906	-60.7942	-58.661	-67.8711	-64.3803	-61.1607	-57.9083	-59.1935	-60.0284
907	-60.7942	-58.7201	-67.9072	-64.3935	-61.0621	-57.9576	-59.1639	-59.9856
908	-60.8107	-58.7366	-68.0026	-64.4	-61.0818	-57.9313	-59.1146	-59.9922
909	-60.8632	-58.7694	-67.8514	-64.4986	-61.095	-57.8557	-59.1343	-59.9528
910	-61.1032	-58.799	-67.8941	-64.4756	-60.9405	-57.8984	-59.1935	-59.9955
911	-61.0605	-58.9535	-67.8941	-64.5479	-60.8616	-57.8787	-59.1573	-59.9659
912	-61.044	-58.8944	-67.7823	-64.5578	-60.7696	-57.9083	-59.108	-60.0514
913	-61.1821	-58.9404	-67.95	-64.5742	-60.8222	-57.8392	-59.1047	-60.0744
914	-61.1131	-59.0554	-67.973	-64.6301	-60.694	-57.8557	-59.2033	-60.0678
915	-61.3431	-59.0817	-67.9565	-64.6597	-60.7498	-57.8885	-59.2198	-60.1007
916	-61.2774	-59.1869	-68.042	-64.6564	-60.6348	-58.02	-59.3118	-60.0744
917	-61.2971	-59.2263	-68.0453	-64.5874	-60.6578	-57.9576	-59.2296	-60.0251
918	-61.2544	-59.2132	-67.9993	-64.6466	-60.7038	-57.9937	-59.2592	-60.1007
919	-61.3694	-59.44	-68.0091	-64.6893	-60.7235	-57.951	-59.1705	-60.1533
920	-61.3694	-59.4433	-67.9796	-64.64	-60.8222	-57.9477	-59.3019	-60.0218
921	-61.3596	-59.5583	-67.9401	-64.7189	-60.8222	-57.9247	-59.1869	-60.1007
922	-61.3892	-59.6274	-67.8514	-64.6038	-60.8616	-57.9773	-59.2559	-60.0481
923	-61.4812	-59.6767	-67.7725	-64.6367	-60.8682	-58.0858	-59.2066	-60.0448
924	-61.5108	-59.6931	-67.7593	-64.6728	-60.9043	-58.0562	-59.2263	-59.956
925	-61.6193	-59.7884	-67.6673	-64.5742	-60.901	-58.0595	-59.2428	-60.0711
926	-61.6127	-59.9067	-67.5391	-64.5611	-60.8189	-58.0562	-59.1836	-60.0744
927	-61.662	-59.8837	-67.4438	-64.5447	-60.7959	-57.9707	-59.1836	-60.104
928	-61.685	-59.9133	-67.3024	-64.6005	-60.7203	-58.0299	-59.3578	-59.9955
929	-61.7474	-60.1467	-67.2466	-64.5907	-60.6907	-58.0365	-59.2329	-60.0612
930	-61.8822	-60.1303	-67.0954	-64.4493	-60.7433	-58.0233	-59.1343	-60.0875
931	-61.7737	-60.173	-67.0428	-64.4033	-60.7104	-58.0069	-59.2428	-60.1368
932	-61.7935	-60.2847	-66.9047	-64.3409	-60.6381	-58.0562	-59.1738	-60.104
933	-61.8329	-60.288	-66.839	-64.2061	-60.6775	-58.1055	-59.2296	-60.173
934	-61.9249	-60.3834	-66.5924	-64.1535	-60.6381	-58.1351	-59.1968	-60.0908
935	-61.9019	-60.3439	-66.5168	-64.0253	-60.6019	-58.2304	-59.1738	-60.0579
936	-62.0235	-60.3603	-66.3656	-63.9333	-60.6545	-58.1384	-59.2461	-60.196
937	-62.0433	-60.482	-66.1881	-63.8807	-60.6447	-58.1679	-59.1836	-60.1631
938	-62.0597	-60.4951	-66.106	-63.7525	-60.7466	-58.1745	-59.2198	-60.0875
939	-62.0893	-60.5937	-65.9745	-63.5914	-60.5625	-58.2238	-59.1738	-60.0316
940	-62.1649	-60.7022	-65.9548	-63.483	-60.5132	-58.2534	-59.2691	-60.1664
941	-62.1945	-60.6134	-65.8463	-63.3613	-60.5165	-58.1055	-59.2921	-60.1171
942	-62.2504	-60.6825	-65.6984	-63.2594	-60.6414	-58.2534	-59.325	-60.0678
943	-62.2635	-60.8534	-65.5833	-63.2101	-60.7564	-58.2041	-59.3315	-60.1237
944	-62.418	-60.8567	-65.5636	-63.0885	-60.7235	-58.2008	-59.2428	-60.1171
945	-62.4246	-61.0112	-65.5472	-63.0359	-60.7959	-58.2994	-59.2362	-60.0777
946	-62.4903	-61.1098	-65.465	-63.0096	-60.878	-58.2928	-59.2494	-60.1434
947	-62.5002	-61.1394	-65.4124	-62.8486	-60.8419	-58.3487	-59.1902	-60.1007
948	-62.5758	-61.1525	-65.3861	-62.7171	-60.7926	-58.2304	-59.2494	-60.1533
949	-62.5922	-61.215	-65.35	-62.7434	-60.7301	-58.2074	-59.1474	-60.1566
950	-62.5528	-61.2906	-65.373	-62.6448	-60.6808	-58.2074	-59.2165	-60.288
951	-62.5889	-61.4286	-65.3105	-62.5166	-60.7794	-58.2107	-59.2559	-60.2091
952	-62.6251	-61.4549	-65.2185	-62.4804	-60.763	-58.2534	-59.3151	-60.1204
953	-62.5692	-61.5338	-65.1626	-62.395	-60.7959	-58.2534	-59.1968	-60.219
954	-62.7007	-61.6423	-65.156	-62.4147	-60.7071	-58.2863	-59.2132	-60.2552
955	-62.7368	-61.6653	-65.1034	-62.2997	-60.6512	-58.3684	-59.2461	-60.1631
956	-62.7763	-61.7179	-65.1527	-62.3292	-60.5526	-58.3553	-59.2592	-60.2584
957	-62.6448	-61.7672	-65.0508	-62.3325	-60.6216	-58.3553	-59.2822	-60.1697
958	-62.7105	-61.8132	-65.0246	-62.1682	-60.5461	-58.1811	-59.2132	-60.1697
959	-62.8026	-61.9184	-64.9818	-62.155	-60.4836	-58.2863	-59.3052	-60.1401
960	-62.8519	-61.8723	-65.0114	-62.1682	-60.5954	-58.3652	-59.2428	-60.081
961	-62.8519	-61.9808	-64.949	-62.132	-60.5756	-58.2633	-59.2296	-60.1007
962	-62.8256	-62.0038	-65.0377	-62.2799	-60.5461	-58.2797	-59.1705	-60.1861
963	-62.8979	-62.155	-64.9687	-62.1419	-60.4737	-58.2698	-59.1968	-60.2979
964	-62.8749	-62.1649	-65.0147	-62.2635	-60.3291	-58.2994	-59.2329	-60.1631
965	-62.7894	-62.3029	-64.9851	-62.1616	-60.5789	-58.2863	-59.2428	-60.1796
966	-62.8157	-62.3654	-65.0147	-62.1616	-60.717	-58.3224	-59.2428	-60.1335
967	-62.8486	-62.3457	-65.0706	-62.0334	-60.6282	-58.2008	-59.2033	-60.1796
968	-63.0195	-62.2799	-65.156	-62.1156	-60.671	-58.3093	-59.2987	-60.2059
969	-62.9866	-62.3457	-65.1527	-62.0991	-60.7104	-58.3849	-59.2724	-60.2354
970	-62.9176	-62.5232	-65.1823	-62.086	-60.7038	-58.3717	-59.3085	-60.1664
971	-62.9669	-62.5232	-65.2086	-62.0564	-60.9273	-58.2797	-59.3151	-60.1927
972	-62.9965	-62.5363	-65.1955	-62.1287	-60.8386	-58.3783	-59.2822	-60.2354
973	-63.0162	-62.6711	-65.2941	-62.1846	-60.763	-58.3684	-59.2691	-60.2913
974	-62.9669	-62.7204	-65.3039	-62.0531	-60.8649	-58.3421	-59.3315	-60.2782
975	-63.0031	-62.7237	-65.3532	-62.0663	-60.855	-58.2468	-59.3578	-60.2157
976	-63.0688	-62.7631	-65.2579	-62.0991	-60.7991	-58.2403	-59.2658	-60.2387
977	-63.1082	-62.8124	-65.465	-62.1616	-60.6874	-58.3421	-59.2066	-60.2979
978	-63.0524	-62.8552	-65.4223	-62.1222	-60.763	-58.3684	-59.2559	-60.2091
979	-63.0392	-62.8289	-65.396	-62.1649	-60.717	-58.3093	-59.348	-60.1861
980	-63.0589	-62.9209	-65.4782	-62.0794	-60.6019	-58.26	-59.4104	-60.1368
981	-63.1477	-63.0359	-65.4584	-62.086	-60.6216	-58.4243	-59.4334	-60.1598
982	-63.2167	-62.9045	-65.5176	-62.1189	-60.5526	-58.2435	-59.3151	-60.127
983	-63.1576	-62.9801	-65.5373	-62.1419	-60.6775	-58.3487	-59.2888	-60.2552
984	-63.1608	-62.9538	-65.4026	-62.1386	-60.4967	-58.3389	-59.3578	-60.2683
985	-63.2101	-62.9406	-65.5045	-62.1287	-60.4869	-58.3553	-59.3743	-60.2387
986	-63.3482	-62.9045	-65.4584	-62.1945	-60.4014	-58.4736	-59.3611	-60.1894
987	-63.289	-62.9603	-65.5669	-62.3062	-60.5165	-58.3553	-59.3151	-60.1401
988	-63.2036	-62.9505	-65.5998	-62.3194	-60.5526	-58.3882	-59.3874	-60.1894
989	-63.1937	-63.0524	-65.4979	-62.3917	-60.4869	-58.3356	-59.3973	-60.1401
990	-63.174	-62.934	-65.5242	-62.4246	-60.5855	-58.5196	-59.2789	-60.1401
991	-63.1543	-62.9077	-65.534	-62.4476	-60.6315	-58.5131	-59.2296	-60.0875
992	-63.1904	-62.7631	-65.4946	-62.5166	-60.6841	-58.4736	-59.2756	-60.0941
993	-63.1543	-62.7993	-65.6031	-62.5659	-60.5888	-58.3684	-59.2296	-60.0316
994	-63.0688	-62.8486	-65.6195	-62.6612	-60.6249	-58.4605	-59.2231	-60.0284
995	-62.9406	-62.8354	-65.6261	-62.5265	-60.5723	-58.4638	-59.2296	-60.1007
996	-62.9866	-62.7598	-65.5866	-62.6777	-60.5066	-58.3849	-59.2066	-60.1237
997	-63.0261	-62.7533	-65.6261	-62.7467	-60.5855	-58.4375	-59.2362	-60.0612
998	-62.9636	-62.7072	-65.5176	-62.6481	-60.5691	-58.4901	-59.1474	-60.0284
999	-63.0096	-62.6218	-65.5866	-62.7861	-60.6512	-58.4868	-59.1738	-60.0514
1000	-63.0359	-62.7171	-65.5505	-62.7763	-60.6677	-58.4473	-59.2033	-60.0054
1001	-63.0096	-62.6809	-65.5899	-62.7993	-60.8156	-58.4408	-59.131	-60.0284
1002	-62.9505	-62.6908	-65.6261	-62.9538	-60.7203	-58.3816	-59.0718	-60.0218
1003	-62.9209	-62.6086	-65.6622	-62.8289	-60.8452	-58.3191	-59.1738	-60.0349
1004	-63.0557	-62.6777	-65.6261	-63.0031	-60.9668	-58.4243	-59.0423	-60.0612
1005	-62.911	-62.5988	-65.7707	-63.1543	-61.0457	-58.4145	-59.062	-60.0481
1006	-62.9077	-62.5495	-65.6787	-63.1707	-61.2133	-58.4145	-59.0554	-59.9462
1007	-63.0326	-62.6053	-65.705	-63.1773	-61.2725	-58.3224	-59.0488	-60.0415
1008	-62.8453	-62.6152	-65.7707	-63.1214	-61.4072	-58.4769	-59.1113	-59.9298
1009	-62.9143	-62.5429	-65.8069	-63.2233	-61.4401	-58.4408	-59.131	-59.9922
1010	-62.8617	-62.5823	-65.7871	-63.2036	-61.3941	-58.4375	-59.1573	-59.933
1011	-63.0064	-62.5988	-65.7345	-63.2003	-61.3941	-58.4605	-59.131	-59.8739
1012	-62.9439	-62.5955	-65.8101	-63.2923	-61.5124	-58.5131	-59.1705	-60.0021
1013	-62.9143	-62.6448	-65.8397	-63.3416	-61.4861	-58.4243	-59.0225	-60.0349
1014	-62.8716	-62.5922	-65.9252	-63.3679	-61.5486	-58.5032	-59.0587	-59.9626
1015	-62.7894	-62.6251	-65.9646	-63.4665	-61.5814	-58.4572	-59.1639	-59.9856
1016	-62.8683	-62.6481	-65.9712	-63.4139	-61.4894	-58.4868	-59.1935	-59.8772
1017	-62.8617	-62.6448	-66.0074	-63.4238	-61.4138	-58.4703	-59.1836	-59.9199
1018	-62.7894	-62.6908	-65.9285	-63.5027	-61.5058	-58.4901	-59.0291	-59.7687
1019	-62.796	-62.51	-65.912	-63.4994	-61.4993	-58.4408	-59.0653	-59.8048
1020	-62.8552	-62.6218	-65.9482	-63.4994	-61.4927	-58.5295	-59.0094	-59.8541
1021	-62.9012	-62.6941	-65.9646	-63.529	-61.4368	-58.4375	-59.1442	-59.8443
1022	-62.7664	-62.6875	-66.0106	-63.6013	-61.6373	-58.4638	-59.0587	-59.8213
1023	-62.727	-62.7007	-65.9876	-63.5881	-61.6965	-58.5098	-59.1573	-59.8114
1024	-62.727	-62.75	-65.9351	-63.7196	-61.6505	-58.5032	-59.039	-59.8016
1025	-62.7894	-62.7828	-65.9909	-63.7656	-61.7293	-58.5788	-59.0653	-59.7391
1026	-62.7302	-62.8519	-66.0402	-63.8182	-61.8543	-58.5229	-59.0916	-59.7753
1027	-62.8157	-62.8979	-66.0074	-63.7624	-61.7359	-58.4473	-59.0916	-59.818
1028	-62.8617	-62.9373	-65.9712	-63.7755	-61.8411	-58.4901	-59.0225	-59.8016
1029	-62.8617	-62.9045	-65.9613	-63.7459	-61.9298	-58.4703	-59.0291	-59.8574
1030	-62.7927	-63.0688	-66.0106	-63.884	-61.9529	-58.5328	-59.085	-59.7227
1031	-62.75	-63.0392	-65.8069	-63.6999	-61.8674	-58.5262	-59.0423	-59.7424
1032	-62.6645	-63.0524	-65.8595	-63.6605	-61.9003	-58.4703	-59.0653	-59.6306
1033	-62.75	-63.1115	-65.7773	-63.6966	-61.8608	-58.4112	-59.0423	-59.6405
1034	-62.6711	-63.0918	-65.6655	-63.5684	-61.7458	-58.4736	-59.016	-59.6964
1035	-62.6349	-63.151	-65.534	-63.5849	-61.7096	-58.4671	-59.0324	-59.6865
1036	-62.6514	-63.174	-65.4058	-63.529	-61.68	-58.5525	-58.993	-59.7095
1037	-62.6283	-63.2594	-65.35	-63.4632	-61.7622	-58.4868	-58.9634	-59.6438
1038	-62.5856	-63.2332	-65.2842	-63.4205	-61.5617	-58.5098	-59.0061	-59.6011
1039	-62.6415	-63.4139	-65.2152	-63.4074	-61.5716	-58.5295	-58.9995	-59.6668
1040	-62.6021	-63.3581	-65.1166	-63.4304	-61.611	-58.5229	-58.9897	-59.6471
1041	-62.6448	-63.4139	-65.1297	-63.3909	-61.5617	-58.5361	-59.0521	-59.6405
1042	-62.7138	-63.4501	-64.9588	-63.3416	-61.4565	-58.5558	-59.1606	-59.6767
1043	-62.7828	-63.4534	-64.8734	-63.2825	-61.4335	-58.6084	-59.062	-59.6734
1044	-62.934	-63.4895	-64.709	-63.3219	-61.2692	-58.5722	-59.1047	-59.6208
1045	-62.9735	-63.5684	-64.6597	-63.312	-61.3908	-58.5525	-59.0751	-59.5748
1046	-62.8223	-63.5816	-64.6564	-63.3416	-61.3481	-58.4966	-58.9897	-59.6208
1047	-62.9045	-63.6177	-64.6531	-63.2989	-61.279	-58.6248	-59.0225	-59.5222
1048	-62.9472	-63.598	-64.5184	-63.312	-61.3711	-58.5887	-59.0784	-59.5386
1049	-62.9965	-63.644	-64.5479	-63.2529	-61.3776	-58.6873	-59.0784	-59.6372
1050	-62.8552	-63.6802	-64.5052	-63.2923	-61.3415	-58.6314	-59.0718	-59.6339
1051	-62.9373	-63.7098	-64.4263	-63.3515	-61.4467	-58.6445	-59.0225	-59.6011
1052	-63.0228	-63.7689	-64.4296	-63.3383	-61.4335	-58.5985	-59.1442	-59.5485
1053	-63.0031	-63.8182	-64.3442	-63.1937	-61.6044	-58.5624	-59.2066	-59.5879
1054	-62.8913	-63.7065	-64.3967	-63.2332	-61.6439	-58.592	-59.0981	-59.5287
1055	-62.8847	-63.8412	-64.3047	-63.3022	-61.7589	-58.6478	-59.1212	-59.5517
1056	-62.8782	-63.8873	-64.3113	-63.3416	-61.8148	-58.6248	-59.1047	-59.4827
1057	-62.8519	-63.9004	-64.2521	-63.3876	-61.9167	-58.6183	-59.131	-59.4959
1058	-62.8617	-63.8281	-64.285	-63.3811	-61.8608	-58.7037	-59.131	-59.5452
1059	-62.8026	-63.7985	-64.2488	-63.3646	-61.9036	-58.7169	-59.1705	-59.4926
1060	-62.8913	-63.8478	-64.2324	-63.4074	-61.9561	-58.6971	-59.1244	-59.6043
1061	-62.8584	-63.7854	-64.3146	-63.3942	-61.9759	-58.6117	-59.2198	-59.5682
1062	-62.8486	-63.9103	-64.3277	-63.4041	-62.035	-58.6478	-59.1836	-59.5123
1063	-62.8519	-63.861	-64.2587	-63.3909	-62.1172	-58.73	-59.1474	-59.5254
1064	-62.8552	-63.9037	-64.285	-63.4041	-62.058	-58.569	-59.1672	-59.5748
1065	-62.7894	-63.9399	-64.308	-63.3745	-61.9364	-58.6807	-59.1409	-59.532
1066	-62.8716	-63.7952	-64.2718	-63.4041	-61.9792	-58.7563	-59.1343	-59.532
1067	-62.8584	-63.9267	-64.262	-63.3482	-62.0054	-58.6741	-59.2789	-59.5353
1068	-62.842	-63.861	-64.2587	-63.3219	-62.0811	-58.7727	-59.154	-59.5517
1069	-62.9538	-63.93	-64.1732	-63.3351	-62.0416	-58.7103	-59.108	-59.5682
1070	-62.9505	-63.8807	-64.1995	-63.3679	-62.1632	-58.7563	-59.177	-59.509
1071	-63.0129	-63.9136	-64.2554	-63.2299	-62.0975	-58.7563	-59.1343	-59.5485
1072	-63.0096	-63.9103	-64.1995	-63.2299	-62.1172	-58.7333	-59.1573	-59.5485
1073	-62.9636	-63.9497	-64.1108	-63.1608	-62.0022	-58.7497	-59.1639	-59.5452
1074	-63.0622	-63.884	-64.1173	-63.1444	-62.0876	-58.8122	-59.1474	-59.4959
1075	-63.1017	-63.9168	-64.0615	-63.1148	-62.0548	-58.7103	-59.1409	-59.4992
1076	-63.1773	-63.8412	-64.0582	-63.1148	-62.1797	-58.7497	-59.2066	-59.5748
1077	-63.174	-63.9399	-63.9168	-62.9866	-62.0843	-58.7925	-59.1442	-59.4893
1078	-63.1674	-63.8117	-64.0122	-62.9439	-62.1008	-58.8023	-59.1277	-59.5057
1079	-63.197	-63.9596	-63.9662	-62.9077	-62.2125	-58.8549	-59.0554	-59.486
1080	-63.1839	-63.9333	-63.8807	-62.842	-62.3539	-58.8615	-59.0949	-59.5583
1081	-63.2397	-63.9333	-63.861	-62.75	-62.3539	-58.7432	-59.131	-59.509
1082	-63.2562	-63.9596	-63.8314	-62.7434	-62.3243	-58.7497	-59.1639	-59.578
1083	-63.2364	-63.9497	-63.69	-62.7467	-62.4459	-58.8352	-59.1146	-59.6405
1084	-63.312	-63.9234	-63.6802	-62.7072	-62.4722	-58.7793	-59.0686	-59.5189
1085	-63.2759	-63.861	-63.7262	-62.7072	-62.5905	-58.7629	-59.154	-59.5254
1086	-63.289	-63.8708	-63.8084	-62.6415	-62.6333	-58.8155	-59.0587	-59.5156
1087	-63.2134	-63.9924	-63.7492	-62.6448	-62.8436	-58.8056	-59.108	-59.6175
1088	-63.3876	-63.9924	-63.7558	-62.6744	-62.9291	-58.8188	-59.0949	-59.5715
1089	-63.2036	-64.1042	-63.6144	-62.6744	-63.1493	-58.9207	-59.085	-59.5616
1090	-63.197	-64.1305	-63.7854	-62.6809	-63.3169	-58.9207	-59.1376	-59.6832
1091	-63.1345	-64.1667	-63.6835	-62.6842	-63.4517	-58.9108	-59.0981	-59.5682
1092	-63.2594	-64.3047	-63.7196	-62.7828	-63.5667	-58.9831	-59.0521	-59.4992
1093	-63.1444	-64.3179	-63.7755	-62.6645	-63.741	-59.0949	-59.2132	-59.555
1094	-63.2167	-64.4428	-63.7163	-62.6777	-63.6128	-59.0028	-59.1474	-59.6701
1095	-63.1904	-64.3179	-63.69	-62.727	-63.6917	-59.039	-59.1639	-59.6142
1096	-63.2792	-64.3803	-63.6309	-62.5823	-63.7442	-59.1047	-59.1244	-59.6076
1097	-63.2562	-64.4066	-63.5257	-62.5988	-63.8823	-58.9831	-59.1146	-59.726
1098	-63.197	-64.4165	-63.5684	-62.7138	-63.879	-59.0357	-59.1146	-59.6832
1099	-63.2496	-64.4986	-63.5257	-62.6349	-63.9185	-58.9535	-59.1146	-59.6504
1100	-63.2003	-64.5151	-63.5323	-62.6777	-63.8001	-58.97	-59.1014	-59.6306
1101	-63.2759	-64.6005	-63.5356	-62.5955	-63.81	-59.0488	-59.1606	-59.6701
1102	-63.312	-64.5381	-63.575	-62.487	-63.7804	-59.0488	-59.085	-59.6438
1103	-63.1773	-64.6728	-63.5454	-62.5725	-63.7705	-58.9502	-59.0883	-59.5748
1104	-63.1839	-64.5677	-63.5224	-62.5297	-63.6522	-59.085	-59.0324	-59.6569
1105	-63.1871	-64.6137	-63.5224	-62.5199	-63.5996	-59.016	-59.0258	-59.6274
1106	-63.2101	-64.5973	-63.4205	-62.5429	-63.5667	-59.0817	-59.0127	-59.6471
1107	-63.1345	-64.6301	-63.5421	-62.4114	-63.6161	-59.1244	-59.1146	-59.6076
1108	-63.1543	-64.6038	-63.5125	-62.2931	-63.6785	-59.1442	-59.0784	-59.6668
1109	-63.1444	-64.6827	-63.4928	-62.349	-63.5142	-59.154	-59.1179	-59.6964
1110	-63.0524	-64.5742	-63.6079	-62.3457	-63.5865	-59.1836	-59.0653	-59.7227
1111	-63.0458	-64.7156	-63.6342	-62.3424	-63.5142	-59.2329	-59.0291	-59.6471
1112	-62.9669	-64.6531	-63.6703	-62.372	-63.6226	-59.2362	-58.9404	-59.7555
1113	-63.0721	-64.6959	-63.7229	-62.2734	-63.6193	-59.1705	-59.0258	-59.772
1114	-62.9538	-64.6367	-63.8511	-62.2339	-63.6128	-59.2461	-59.0521	-59.7654
1115	-62.9965	-64.6005	-63.9267	-62.2175	-63.7048	-59.154	-59.1212	-59.8509
1116	-62.8946	-64.594	-63.8708	-62.1616	-63.57	-59.2066	-59.062	-59.7325
1117	-62.9176	-64.5677	-64.0155	-62.0827	-63.4714	-59.2428	-59.0028	-59.8541
1118	-62.7401	-64.6137	-64.0187	-62.1682	-63.3597	-59.2921	-58.9601	-59.7983
1119	-62.819	-64.5151	-64.0516	-62.1419	-63.2545	-59.3447	-59.0883	-59.8443
1120	-62.7894	-64.4592	-64.1732	-62.0137	-63.1033	-59.3578	-59.1113	-59.864
1121	-62.865	-64.3836	-64.1798	-61.8822	-63.1394	-59.3282	-59.0653	-59.8509
1122	-62.7598	-64.4033	-64.2784	-61.9052	-63.0967	-59.2789	-59.085	-59.9067
1123	-62.7828	-64.3277	-64.2554	-61.7573	-62.9915	-59.325	-59.2132	-59.8772
1124	-62.8256	-64.2948	-64.3343	-61.8395	-62.8995	-59.3348	-59.2756	-59.8903
1125	-62.7007	-64.1009	-64.2916	-61.8296	-62.9817	-59.325	-59.0949	-59.8772
1126	-62.6678	-64.0713	-64.2948	-61.8198	-62.8601	-59.4367	-59.1738	-59.9035
1127	-62.6842	-63.9037	-64.4296	-61.7179	-62.9061	-59.3775	-59.2789	-59.9462
1128	-62.6711	-63.7722	-64.4033	-61.7179	-62.8962	-59.3512	-59.2855	-59.9067
1129	-62.6218	-63.7821	-64.5052	-61.6751	-62.7417	-59.3545	-59.325	-59.8574
1130	-62.6579	-63.6966	-64.5315	-61.5962	-62.8108	-59.3578	-59.2658	-59.956
1131	-62.7204	-63.4731	-64.663	-61.6488	-62.8502	-59.4794	-59.2888	-59.9429
1132	-62.6185	-63.4501	-64.5775	-61.5371	-62.8075	-59.532	-59.3874	-59.9035
1133	-62.5232	-63.3482	-64.6334	-61.4319	-62.7614	-59.417	-59.3019	-60.0021
1134	-62.6481	-63.1115	-64.6301	-61.3563	-62.7582	-59.4992	-59.2526	-59.9298
1135	-62.6514	-63.2036	-64.6728	-61.2215	-62.814	-59.4663	-59.3118	-59.9363
1136	-62.6974	-63.0721	-64.7222	-61.1919	-62.7943	-59.4597	-59.2822	-59.9133
1137	-62.8026	-63.0031	-64.709	-61.1032	-62.7713	-59.5254	-59.3381	-59.8969
1138	-62.75	-62.8486	-64.7616	-61.0407	-62.9159	-59.4959	-59.3677	-59.9396
1139	-62.6086	-62.8979	-64.7353	-60.837	-62.9291	-59.4499	-59.3315	-59.933
1140	-62.6349	-62.7631	-64.6203	-60.8337	-62.8403	-59.4794	-59.3414	-60.0119
1141	-62.6316	-62.6645	-64.5874	-60.7581	-62.7483	-59.4433	-59.3808	-59.9495
1142	-62.6021	-62.6086	-64.5677	-60.6332	-62.7976	-59.5353	-59.3052	-59.9528
1143	-62.556	-62.6152	-64.4461	-60.5904	-62.8962	-59.4992	-59.3611	-59.9955
1144	-62.7138	-62.5396	-64.5216	-60.4294	-62.9094	-59.5287	-59.3315	-59.9002
1145	-62.5955	-62.4673	-64.4296	-60.4195	-62.7483	-59.6076	-59.3184	-59.9593
1146	-62.5593	-62.4607	-64.3179	-60.3472	-62.8206	-59.6076	-59.4236	-59.9298
1147	-62.5725	-62.4213	-64.4855	-60.2782	-62.8338	-59.5452	-59.3578	-59.9659
1148	-62.5067	-62.3917	-64.3474	-60.2059	-62.7845	-59.4334	-59.4071	-59.818
1149	-62.5002	-62.3424	-64.3442	-60.0974	-62.8666	-59.6109	-59.3545	-59.9133
1150	-62.487	-62.3818	-64.3244	-60.1204	-62.8633	-59.5123	-59.3907	-59.9363
1151	-62.4673	-62.3851	-64.2357	-60.0777	-62.791	-59.5287	-59.4301	-59.9758
1152	-62.4673	-62.4278	-64.1371	-59.9396	-62.7089	-59.5485	-59.394	-59.9823
1153	-62.4772	-62.3029	-64.1535	-59.9133	-62.6365	-59.5682	-59.2921	-60.0185
1154	-62.5166	-62.2865	-64.0976	-59.8213	-62.5314	-59.6668	-59.3348	-59.9725
1155	-62.3785	-62.2536	-64.0746	-59.7621	-62.63	-59.4268	-59.325	-59.9298
1156	-62.3391	-62.0959	-64.0516	-59.8048	-62.6497	-59.555	-59.4005	-59.91
1157	-62.3522	-62.0038	-64.022	-59.6997	-62.4492	-59.5846	-59.4005	-59.9528
1158	-62.2898	-61.8986	-64.0385	-59.7523	-62.4722	-59.6241	-59.4992	-59.9955
1159	-62.2372	-61.9184	-63.9694	-59.7325	-62.5478	-59.7161	-59.5156	-60.0974
1160	-62.2504	-61.7211	-64.0582	-59.8246	-62.4755	-59.6175	-59.4663	-60.0974
1161	-62.3062	-61.6948	-63.9497	-59.6569	-62.3341	-59.6668	-59.4762	-60.0185
1162	-62.2043	-61.6488	-63.9694	-59.6931	-62.3407	-59.6931	-59.5583	-60.0316
1163	-62.2964	-61.6258	-63.976	-59.6898	-62.2783	-59.7325	-59.5813	-60.1072
1164	-62.2339	-61.6718	-64.068	-59.6043	-62.3243	-59.6799	-59.5123	-60.0777
1165	-62.2109	-61.7014	-63.93	-59.6438	-62.2355	-59.6832	-59.4992	-60.0744
1166	-62.2471	-61.5667	-63.9694	-59.6339	-62.1402	-59.5649	-59.6372	-60.1138
1167	-62.2536	-61.5437	-63.9464	-59.6043	-62.1205	-59.5386	-59.4597	-60.1072
1168	-62.2569	-61.5962	-63.8873	-59.555	-62.0712	-59.6405	-59.5222	-60.0711
1169	-62.2273	-61.5239	-63.8774	-59.6142	-61.943	-59.6569	-59.532	-60.1598
1170	-62.3029	-61.4549	-63.9497	-59.5386	-61.8543	-59.6142	-59.509	-60.081
1171	-62.3161	-61.4812	-63.9136	-59.5748	-61.8312	-59.6734	-59.5682	-60.0777
1172	-62.3194	-61.5141	-63.8873	-59.6274	-61.6636	-59.7062	-59.509	-59.9955
1173	-62.2734	-61.422	-63.9333	-59.6504	-61.5716	-59.8213	-59.5616	-59.9823
1174	-62.3161	-61.4681	-63.8774	-59.7358	-61.5913	-59.8147	-59.7194	-60.081
1175	-62.2701	-61.5502	-63.861	-59.7194	-61.5617	-59.6997	-59.6898	-60.0678
1176	-62.2898	-61.5601	-63.9924	-59.7095	-61.4467	-59.7588	-59.5287	-60.1237
1177	-62.3654	-61.5206	-64.0023	-59.7391	-61.6077	-59.6734	-59.6339	-60.0481
1178	-62.2766	-61.6061	-64.0089	-59.6931	-61.5913	-59.6734	-59.6569	-60.0612
1179	-62.2536	-61.6981	-64.0615	-59.8213	-61.5486	-59.6832	-59.6799	-60.0645
1180	-62.3391	-61.6258	-64.1075	-59.7917	-61.5157	-59.6076	-59.6931	-60.0842
1181	-62.3292	-61.4023	-64.0976	-59.7457	-61.4401	-59.7062	-59.6504	-60.0481
1182	-62.3194	-61.5206	-64.0615	-59.7227	-61.565	-59.8016	-59.6274	-60.0448
1183	-62.2964	-61.4253	-64.0911	-59.7391	-61.473	-59.7292	-59.8016	-60.0974
1184	-62.3292	-61.4286	-64.1929	-59.7917	-61.3744	-59.6635	-59.7325	-60.1072
1185	-62.2043	-61.5305	-64.1634	-59.7884	-61.5321	-59.6767	-59.7128	-60.1631
1186	-62.3128	-61.5667	-64.2094	-59.7851	-61.5058	-59.7391	-59.7884	-60.1072
1187	-62.2536	-61.5864	-64.2488	-59.7917	-61.5979	-59.7227	-59.8016	-60.2091
1188	-62.1912	-61.5897	-64.2061	-59.8969	-61.6899	-59.6931	-59.8114	-60.0678
1189	-62.2339	-61.5338	-64.2061	-59.864	-61.7622	-59.6076	-59.8114	-60.0284
1190	-62.2865	-61.6061	-64.3573	-59.8739	-61.7063	-59.6832	-59.7785	-60.0284
1191	-62.1123	-61.5634	-64.3179	-59.8344	-61.7688	-59.5912	-59.7292	-59.9889
1192	-62.1846	-61.685	-64.4329	-60.0152	-61.7589	-59.7358	-59.7654	-59.9922
1193	-62.1189	-61.7409	-64.3935	-59.9067	-61.6077	-59.7062	-59.7523	-60.0875
1194	-62.1616	-61.6883	-64.3474	-59.9922	-61.5716	-59.5978	-59.7687	-60.0382
1195	-62.2273	-61.6948	-64.4954	-60.0316	-61.6077	-59.5945	-59.749	-60.0415
1196	-62.2471	-61.662	-64.4592	-59.9922	-61.6636	-59.5616	-59.8114	-60.0152
1197	-62.0926	-61.7869	-64.5644	-60.1697	-61.657	-59.5748	-59.6931	-60.0185
1198	-62.0696	-61.7639	-64.5479	-60.1861	-61.7787	-59.6274	-59.8509	-60.0349
1199	-61.9874	-61.8428	-64.6531	-60.2486	-61.8148	-59.5813	-59.7818	-60.0974
1200	-62.0367	-61.8132	-64.8109	-60.219	-61.7556	-59.5682	-59.7818	-60.1007
1201	-61.9512	-61.846	-64.7287	-60.3176	-61.7392	-59.578	-59.7851	-60.0021
1202	-61.9085	-61.8198	-64.8076	-60.2453	-61.7359	-59.6175	-59.8574	-60.0579
1203	-61.8592	-61.8756	-64.8076	-60.3143	-61.5781	-59.6635	-59.841	-60.1171
1204	-61.8986	-61.8986	-64.778	-60.4261	-61.4302	-59.7095	-59.7654	-60.1237
1205	-61.7869	-61.8921	-64.7879	-60.4491	-61.2856	-59.6734	-59.7917	-60.1171
1206	-61.8395	-61.9381	-64.8405	-60.4491	-61.187	-59.7654	-59.8574	-60.1138
1207	-61.7967	-61.9085	-64.7616	-60.5313	-61.0983	-59.7588	-59.8246	-60.0875
1208	-61.7343	-61.8099	-64.8076	-60.5839	-61.1443	-59.6635	-59.8739	-60.1105
1209	-61.6916	-61.9874	-64.7945	-60.528	-61.141	-59.7128	-59.8903	-60.0777
1210	-61.7442	-61.9217	-64.7649	-60.4392	-61.0424	-59.7555	-59.9298	-60.0415
1211	-61.7146	-61.9841	-64.732	-60.5214	-61.0259	-59.8147	-59.8903	-60.1631
1212	-61.7573	-62.0367	-64.7189	-60.6397	-61.0358	-59.7457	-59.9067	-60.0744
1213	-61.8066	-62.0466	-64.6663	-60.7548	-60.9766	-59.8377	-59.9725	-60.1434
1214	-61.8296	-62.0761	-64.8438	-60.6956	-61.0489	-59.8706	-60.0119	-60.0908
1215	-61.7573	-62.1386	-64.686	-60.8468	-60.9635	-59.8147	-60.0678	-60.15
1216	-61.7442	-62.2208	-64.7846	-60.7581	-60.8945	-59.8147	-60.0218	-60.0316
1217	-61.6718	-62.2076	-64.7616	-60.8567	-60.8189	-59.7917	-60.0119	-60.0382
1218	-61.8198	-62.2635	-64.7353	-60.8895	-60.717	-59.8048	-60.0218	-60.0941
1219	-61.8559	-62.1485	-64.801	-60.906	-60.717	-59.7983	-59.9791	-60.0579
1220	-61.7967	-62.2372	-64.7452	-60.9651	-60.763	-59.8706	-60.0349	-59.9922
1221	-61.8592	-62.3128	-64.7583	-61.0013	-60.7268	-59.795	-60.0415	-60.0744
1222	-61.8723	-62.3227	-64.7747	-61.0276	-60.7038	-59.8114	-60.0514	-60.15
1223	-61.8921	-62.2109	-64.7452	-61.1722	-60.7663	-59.8016	-60.0908	-60.0251
1224	-61.9019	-62.2997	-64.7978	-61.1689	-60.7071	-59.8541	-60.0711	-60.0021
1225	-61.8592	-62.2898	-64.6794	-61.2182	-60.6742	-59.8279	-60.1335	-59.9955
1226	-61.9184	-62.3917	-64.7353	-61.3234	-60.5033	-59.841	-60.1007	-60.0448
1227	-61.9808	-62.3785	-64.7156	-61.2643	-60.6545	-59.9166	-60.0481	-60.0086
1228	-61.9118	-62.5232	-64.5381	-61.3234	-60.6447	-59.8147	-60.0349	-60.0481
1229	-61.9808	-62.556	-64.6203	-61.4155	-60.7137	-59.9462	-60.0711	-59.9725
1230	-61.9808	-62.5265	-64.4625	-61.4812	-60.8517	-59.91	-60.0777	-60.0119
1231	-61.971	-62.5528	-64.5052	-61.3168	-60.7268	-59.9495	-60.0908	-60.0514
1232	-61.9151	-62.7171	-64.5249	-61.4582	-60.9405	-59.9199	-60.1171	-60.0678
1233	-61.9611	-62.6842	-64.4592	-61.5174	-60.9273	-60.0086	-60.081	-60.0415
1234	-62.0235	-62.6941	-64.4855	-61.731	-60.8813	-60.0185	-60.1138	-60.0612
1235	-61.9775	-62.6711	-64.3704	-61.7113	-60.7367	-60.0086	-60.1467	-60.0218
1236	-61.9775	-62.7302	-64.3113	-61.616	-60.7597	-59.9725	-60.173	-60.0415
1237	-61.8592	-62.8256	-64.3474	-61.5601	-60.7301	-59.956	-60.2256	-59.9791
1238	-61.7902	-62.8814	-64.2751	-61.6686	-60.5954	-60.0251	-60.1335	-59.9363
1239	-61.7442	-62.8716	-64.2883	-61.7047	-60.5855	-59.9396	-60.242	-60.0086
1240	-61.6784	-62.8552	-64.2258	-61.8296	-60.6315	-59.9791	-60.196	-60.0086
1241	-61.5272	-62.9965	-64.2225	-61.7935	-60.6414	-59.9725	-60.1894	-59.9495
1242	-61.5404	-63.0392	-64.2554	-61.8592	-60.6052	-60.0119	-60.1763	-60.0119
1243	-61.3629	-63.082	-64.1042	-61.9184	-60.5888	-59.9791	-60.2749	-59.9955
1244	-61.1985	-63.0951	-64.1404	-61.9085	-60.4803	-59.9791	-60.1697	-59.9035
1245	-61.1196	-63.0852	-64.2028	-61.9742	-60.5592	-59.9758	-60.1303	-59.795
1246	-61.067	-63.1411	-64.1897	-61.9578	-60.5921	-59.9725	-60.1664	-59.8311
1247	-60.9684	-63.1707	-64.1929	-61.9677	-60.5559	-59.9791	-60.1894	-59.7588
1248	-60.8665	-63.2167	-64.1305	-62.063	-60.6282	-60.081	-60.2519	-59.8969
1249	-60.7745	-63.2397	-64.262	-62.0991	-60.832	-60.1335	-60.1894	-59.8837
1250	-60.7351	-63.2759	-64.1798	-62.1517	-60.9734	-60.0579	-60.3209	-59.9955
1251	-60.4787	-63.3153	-64.1798	-62.155	-61.0095	-60.2124	-60.2289	-60.0284
1252	-60.4425	-63.3811	-63.9924	-62.2997	-61.2429	-60.173	-60.1861	-59.9758
1253	-60.3406	-63.22	-64.0746	-62.3062	-61.5453	-60.1171	-60.219	-59.8311
1254	-60.1072	-63.2759	-64.0417	-62.3128	-61.6012	-60.0382	-60.2223	-59.8804
1255	-60.1566	-63.2759	-63.9168	-62.372	-61.7063	-60.0579	-60.2223	-59.8804
1256	-60.0875	-63.1313	-63.953	-62.3194	-61.7293	-60.1894	-60.2552	-59.864
1257	-59.9988	-63.2397	-63.861	-62.4246	-61.6998	-60.1105	-60.2486	-59.8936
1258	-59.8081	-63.197	-63.8347	-62.4772	-61.7063	-60.0777	-60.1828	-59.9035
1259	-59.8114	-63.2101	-63.8347	-62.4607	-61.5814	-60.173	-60.3143	-59.8739
1260	-59.6339	-63.1806	-63.7032	-62.5988	-61.5946	-60.15	-60.2946	-59.7983
1261	-59.7161	-63.312	-63.6868	-62.6283	-61.5321	-60.196	-60.2683	-59.7424
1262	-59.6241	-63.3055	-63.7426	-62.6908	-61.4072	-60.1796	-60.2782	-59.9298
1263	-59.5813	-63.1871	-63.5027	-62.6777	-61.4368	-60.1434	-60.2552	-59.9067
1264	-59.5583	-63.2989	-63.5651	-62.7237	-61.3283	-60.2157	-60.3143	-59.8048
1265	-59.4334	-63.3679	-63.5257	-62.7763	-61.141	-60.1237	-60.3735	-59.8311
1266	-59.3578	-63.2529	-63.6309	-62.9735	-61.0522	-60.1993	-60.3702	-59.9035
1267	-59.4268	-63.3219	-63.5619	-62.8486	-60.9076	-60.1796	-60.2946	-59.8246
1268	-59.4334	-63.3186	-63.483	-62.9768	-60.7728	-60.2519	-60.311	-59.864
1269	-59.3447	-63.3811	-63.4731	-63.0031	-60.809	-60.2683	-60.3439	-59.7851
1270	-59.348	-63.4797	-63.3153	-63.0031	-60.7498	-60.2847	-60.4031	-59.7785
1271	-59.2231	-63.4074	-63.3581	-63.0195	-60.855	-60.3143	-60.3505	-59.7358
1272	-59.2494	-63.5224	-63.3942	-63.0655	-60.7991	-60.3538	-60.3242	-59.6405
1273	-59.3644	-63.4468	-63.3285	-63.0491	-60.7728	-60.3275	-60.3045	-59.749
1274	-59.371	-63.3351	-63.3712	-63.082	-60.717	-60.3439	-60.3965	-59.7555
1275	-59.3019	-63.3909	-63.3515	-63.1313	-60.6019	-60.3275	-60.2979	-59.7588
1276	-59.2954	-63.2759	-63.4041	-63.1576	-60.5329	-60.4261	-60.2683	-59.8016
1277	-59.3282	-63.2693	-63.3745	-63.1477	-60.5723	-60.459	-60.2552	-59.7555
1278	-59.4038	-63.1641	-63.3449	-63.1148	-60.6874	-60.4162	-60.1894	-59.7818
1279	-59.4334	-63.2332	-63.4008	-63.151	-60.717	-60.4754	-60.2584	-59.7983
1280	-59.3677	-63.2463	-63.3186	-63.197	-60.6775	-60.4491	-60.15	-59.8081
1281	-59.4301	-63.2463	-63.4106	-63.0326	-60.6742	-60.3899	-60.0744	-59.7062
1282	-59.4827	-63.2101	-63.3548	-63.2266	-60.74	-60.3965	-60.1763	-59.6076
1283	-59.5682	-63.2627	-63.3942	-63.1707	-60.7498	-60.4984	-60.1828	-59.5649
1284	-59.6076	-63.1871	-63.3646	-63.151	-60.7301	-60.334	-60.1993	-59.5682
1285	-59.703	-63.2036	-63.2627	-63.2562	-60.7827	-60.4359	-60.0645	-59.5715
1286	-59.6274	-63.1806	-63.2857	-63.1214	-60.8353	-60.5181	-60.15	-59.5748
1287	-59.7917	-63.1839	-63.3844	-63.0589	-60.8156	-60.5181	-60.1467	-59.486
1288	-59.8936	-63.0951	-63.3778	-63.0918	-60.8156	-60.4655	-60.0415	-59.4696
1289	-59.8739	-63.1641	-63.4369	-63.1345	-60.8649	-60.505	-60.1763	-59.4038
1290	-59.9363	-63.1806	-63.4271	-63.082	-60.9471	-60.5411	-60.104	-59.3743
1291	-60.0054	-63.2825	-63.5224	-63.0852	-60.7926	-60.5313	-60.15	-59.5583
1292	-60.0284	-63.3088	-63.3318	-62.9702	-60.7498	-60.4524	-60.1237	-59.4466
1293	-60.0875	-63.2627	-63.4008	-62.9735	-60.7761	-60.5346	-60.0678	-59.5287
1294	-60.2289	-63.3449	-63.4271	-62.9143	-60.694	-60.528	-60.104	-59.5748
1295	-60.1171	-63.3975	-63.4468	-62.9735	-60.7696	-60.459	-60.0119	-59.5649
1296	-60.242	-63.4402	-63.4008	-62.8716	-60.7761	-60.5083	-60.0119	-59.555
1297	-60.1566	-63.4106	-63.3646	-62.8289	-60.8517	-60.4491	-60.0481	-59.6208
1298	-60.3045	-63.483	-63.3449	-62.8026	-60.694	-60.5181	-59.9725	-59.532
1299	-60.334	-63.5717	-63.312	-62.7565	-60.6381	-60.4195	-60.0349	-59.6175
1300	-60.4458	-63.6309	-63.3153	-62.6382	-60.671	-60.4655	-59.9856	-59.5912
1301	-60.4885	-63.7722	-63.2792	-62.5626	-60.5559	-60.597	-59.9528	-59.6142
1302	-60.5477	-63.7755	-63.243	-62.5166	-60.4967	-60.4852	-59.933	-59.5386
1303	-60.5707	-63.7985	-63.2496	-62.4476	-60.6216	-60.5214	-59.9363	-59.4893
1304	-60.6102	-63.838	-63.2693	-62.4673	-60.7498	-60.505	-59.8936	-59.6405
1305	-60.6562	-63.8314	-63.1247	-62.3424	-60.8123	-60.551	-59.8969	-59.5813
1306	-60.7646	-63.8445	-63.1839	-62.4706	-60.8222	-60.5674	-59.8509	-59.5517
1307	-60.7975	-63.9366	-63.0096	-62.533	-60.74	-60.643	-59.7785	-59.5945
1308	-60.8632	-63.7624	-63.0096	-62.4739	-60.6381	-60.5543	-59.7785	-59.555
1309	-60.8468	-63.7098	-62.9308	-62.3588	-60.6019	-60.6167	-59.7358	-59.5879
1310	-60.837	-63.7985	-62.888	-62.2799	-60.5493	-60.5707	-59.7654	-59.6142
1311	-60.9717	-63.8051	-62.9636	-62.3917	-60.4967	-60.6036	-59.7654	-59.5945
1312	-61.0375	-63.7755	-62.9998	-62.2865	-60.5033	-60.6167	-59.7785	-59.6405
1313	-61.1131	-63.8807	-62.911	-62.3194	-60.4376	-60.6529	-59.7457	-59.6306
1314	-61.0638	-63.953	-62.9669	-62.2076	-60.3455	-60.551	-59.7161	-59.6306
1315	-61.1854	-64.0352	-63.0031	-62.1912	-60.3094	-60.6069	-59.6734	-59.7062
1316	-61.1624	-64.0319	-62.9801	-62.1813	-60.339	-60.6858	-59.6142	-59.7128
1317	-61.1558	-64.1929	-63.0228	-62.1649	-60.2436	-60.6036	-59.6043	-59.7161
1318	-61.1361	-64.1502	-62.9439	-62.1616	-60.2141	-60.7088	-59.6011	-59.7194
1319	-61.1722	-64.1962	-63.0261	-62.2142	-60.293	-60.6332	-59.5879	-59.6701
1320	-61.1689	-64.2784	-62.9702	-62.1813	-60.2305	-60.6134	-59.509	-59.4992
1321	-61.1591	-64.331	-62.9242	-62.178	-60.0004	-60.6167	-59.509	-59.5057
1322	-61.1492	-64.331	-63.0918	-62.2471	-60.007	-60.5674	-59.4762	-59.4531
1323	-61.1361	-64.3902	-63.0458	-62.1715	-59.938	-60.6496	-59.4827	-59.4794
1324	-61.1985	-64.4329	-62.9833	-62.1583	-59.9643	-60.6759	-59.4499	-59.5254
1325	-61.1262	-64.5775	-63.0918	-62.1649	-59.9708	-60.666	-59.2888	-59.6011
1326	-60.9783	-64.6038	-63.1181	-62.1517	-59.9084	-60.643	-59.394	-59.6372
1327	-61.0046	-64.5874	-63.1937	-62.1024	-60.0694	-60.6003	-59.4005	-59.5682
1328	-61.0276	-64.6696	-63.2397	-62.1189	-60.1056	-60.6726	-59.2888	-59.5912
1329	-61.0638	-64.6564	-63.1904	-62.1386	-60.1845	-60.6562	-59.2888	-59.6306
1330	-60.9717	-64.7024	-63.3153	-62.0794	-60.0859	-60.5937	-59.3217	-59.703
1331	-61.0572	-64.8339	-63.266	-62.0235	-60.0826	-60.6825	-59.3184	-59.7391
1332	-60.9816	-64.7583	-63.2825	-61.9742	-60.1319	-60.6792	-59.2362	-59.7095
1333	-60.906	-64.7649	-63.3153	-61.9348	-60.1812	-60.6102	-59.2559	-59.7621
1334	-60.8074	-64.7945	-63.2496	-61.8362	-60.3488	-60.5904	-59.2494	-59.7785
1335	-60.9158	-64.8569	-63.3712	-61.7474	-60.339	-60.6036	-59.2724	-59.8213
1336	-60.7712	-64.9555	-63.2397	-61.7672	-60.4376	-60.6069	-59.2362	-59.7358
1337	-60.8139	-64.9917	-63.4764	-61.6455	-60.5855	-60.5674	-59.1968	-59.7917
1338	-60.8008	-65.0739	-63.4205	-61.4878	-60.6184	-60.6496	-59.1507	-59.7687
1339	-60.7646	-65.133	-63.4172	-61.4253	-60.6216	-60.6332	-59.1376	-59.726
1340	-60.8402	-65.1067	-63.4928	-61.3793	-60.5526	-60.6496	-59.1014	-59.7325
1341	-60.8139	-65.1462	-63.5356	-61.2281	-60.5756	-60.6332	-59.1244	-59.8016
1342	-60.8402	-65.1889	-63.4567	-61.1131	-60.7038	-60.5773	-59.108	-59.887
1343	-60.8074	-65.2842	-63.5421	-61.0835	-60.694	-60.5773	-59.1146	-59.818
1344	-60.7942	-65.4157	-63.6046	-60.8928	-60.5033	-60.5904	-59.0949	-59.8969
1345	-60.7745	-65.4058	-63.6966	-60.8008	-60.5033	-60.6562	-59.0193	-59.9758
1346	-60.8468	-65.5538	-63.6605	-60.7515	-60.4014	-60.6496	-59.0653	-59.9166
1347	-60.7646	-65.4782	-63.6736	-60.7383	-60.5198	-60.6036	-59.1047	-59.9462
1348	-60.7449	-65.5209	-63.6802	-60.6299	-60.4869	-60.6036	-58.9963	-59.8213
1349	-60.7482	-65.5636	-63.7459	-60.6463	-60.6052	-60.7252	-59.2099	-59.9692
1350	-60.7252	-65.6326	-63.7755	-60.482	-60.6611	-60.5674	-59.0488	-59.8903
1351	-60.666	-65.6162	-63.7755	-60.4491	-60.7203	-60.62	-59.2461	-59.9067
1352	-60.7351	-65.728	-63.8445	-60.3669	-60.7991	-60.6858	-59.0718	-59.864
1353	-60.62	-65.8101	-63.8511	-60.2815	-60.9142	-60.5017	-59.1014	-60.0284
1354	-60.6627	-65.774	-63.9234	-60.1993	-60.878	-60.6299	-58.993	-60.0021
1355	-60.5346	-65.8003	-64.0648	-60.2091	-60.8747	-60.5871	-58.9831	-59.9692
1356	-60.4327	-65.9548	-64.045	-60.0218	-60.8978	-60.6529	-58.993	-59.9462
1357	-60.3242	-65.9285	-63.9892	-60.0842	-60.9799	-60.6693	-59.0357	-59.9298
1358	-60.2617	-66.0139	-64.0155	-59.9922	-60.9372	-60.6496	-59.0751	-60.0152
1359	-60.2946	-65.9613	-63.9366	-60.0054	-60.8715	-60.6365	-59.0456	-60.0185
1360	-60.1664	-66.0337	-64.1042	-60.0284	-61.0555	-60.551	-58.9897	-60.0612
1361	-60.173	-66.0731	-64.1173	-59.9067	-61.0851	-60.5181	-59.039	-60.0547
1362	-60.1368	-66.0468	-64.2751	-59.864	-60.9175	-60.5937	-59.0225	-59.9889
1363	-60.1467	-66.0797	-64.3113	-59.8279	-61.095	-60.5707	-59.0587	-60.0415
1364	-60.0842	-66.0994	-64.3442	-59.8246	-61.1607	-60.5477	-58.97	-60.0284
1365	-60.0711	-65.9942	-64.354	-59.7555	-61.2297	-60.5444	-58.9831	-59.9692
1366	-59.9725	-65.9646	-64.4362	-59.7424	-61.256	-60.5378	-59.0587	-60.0251
1367	-59.9626	-65.8857	-64.3573	-59.6832	-61.2462	-60.6167	-59.016	-59.9955
1368	-59.8969	-65.8003	-64.4461	-59.6076	-61.3086	-60.6003	-59.0324	-60.0382
1369	-59.8804	-65.7838	-64.423	-59.7325	-61.3711	-60.666	-58.9535	-60.0974
1370	-59.8607	-65.82	-64.5677	-59.7227	-61.4664	-60.6069	-58.9765	-60.104
1371	-59.8969	-65.7115	-64.5348	-59.7128	-61.4368	-60.5773	-59.0981	-60.0777
1372	-59.8969	-65.6787	-64.4986	-59.6931	-61.4795	-60.6102	-59.0587	-60.127
1373	-59.8377	-65.5538	-64.6334	-59.6931	-61.4763	-60.6595	-58.9864	-60.0908
1374	-59.8903	-65.4847	-64.6827	-59.6832	-61.4204	-60.5871	-58.9272	-60.1368
1375	-59.8574	-65.5242	-64.6367	-59.7588	-61.4927	-60.5083	-58.993	-60.104
1376	-59.841	-65.5077	-64.6663	-59.8279	-61.4532	-60.4787	-58.8746	-60.0842
1377	-59.7621	-65.4617	-64.6301	-59.7687	-61.4335	-60.6365	-58.8385	-60.1138
1378	-59.8147	-65.4814	-64.6466	-59.8903	-61.4171	-60.5313	-58.8976	-60.0645
1379	-59.8574	-65.4387	-64.5644	-59.8344	-61.5518	-60.528	-58.9732	-60.081
1380	-59.7983	-65.4617	-64.5545	-59.9133	-61.588	-60.5543	-58.9371	-60.0382
1381	-59.8344	-65.4946	-64.6334	-59.9889	-61.5749	-60.4951	-58.8352	-60.1237
1382	-59.8246	-65.4321	-64.7057	-59.8969	-61.542	-60.551	-58.9108	-60.0842
1383	-59.749	-65.3861	-64.6235	-59.9659	-61.5157	-60.5313	-58.9075	-60.1401
1384	-59.726	-65.4617	-64.6203	-59.9265	-61.6209	-60.5477	-58.9174	-60.1796
1385	-59.7621	-65.4584	-64.5479	-59.9265	-61.5387	-60.6397	-58.8089	-60.173
1386	-59.7555	-65.4584	-64.5907	-60.1007	-61.6143	-60.482	-58.8911	-60.1566
1387	-59.7555	-65.2612	-64.6235	-60.0974	-61.5847	-60.5543	-58.9009	-60.2124
1388	-59.7161	-65.2546	-64.5644	-60.1138	-61.6669	-60.5181	-59.0357	-60.1237
1389	-59.6372	-65.1527	-64.4165	-60.2026	-61.6012	-60.5608	-58.8253	-60.0908
1390	-59.7325	-65.2283	-64.5677	-60.3045	-61.565	-60.5871	-58.73	-60.1467
1391	-59.6504	-65.1922	-64.4493	-60.2979	-61.5453	-60.6299	-58.7925	-60.2749
1392	-59.7095	-65.0607	-64.3343	-60.3209	-61.5453	-60.6266	-58.7727	-60.2354
1393	-59.7753	-65.0739	-64.4362	-60.3406	-61.6768	-60.5806	-58.8615	-60.1796
1394	-59.6536	-64.9095	-64.3014	-60.3899	-61.6866	-60.4425	-58.8845	-60.1894
1395	-59.749	-64.8832	-64.2883	-60.5115	-61.7063	-60.551	-58.8944	-60.2584
1396	-59.6306	-64.9029	-64.2357	-60.5181	-61.6899	-60.5411	-58.8319	-60.2091
1397	-59.6701	-64.6663	-64.3014	-60.5904	-61.6242	-60.6332	-58.822	-60.2387
1398	-59.6208	-64.6827	-64.2028	-60.6167	-61.7359	-60.6003	-58.7727	-60.2124
1399	-59.6076	-64.6761	-64.1371	-60.7515	-61.5124	-60.5871	-58.7892	-60.2354
1400	-59.5649	-64.6926	-64.068	-60.8074	-61.4171	-60.5477	-58.753	-60.2124
1401	-59.5419	-64.6301	-64.1404	-60.7581	-61.3842	-60.5247	-58.7957	-60.1598
1402	-59.4926	-64.5742	-64.0976	-60.9454	-61.3218	-60.5346	-58.8746	-60.2256
1403	-59.509	-64.5907	-64.0352	-60.9717	-61.3744	-60.551	-58.8451	-60.2091
1404	-59.4268	-64.5512	-63.9497	-60.9191	-61.3382	-60.5937	-58.7399	-60.2552
1405	-59.4236	-64.4625	-63.9497	-61.0309	-61.2297	-60.6233	-58.8023	-60.2387
1406	-59.4367	-64.5512	-63.8873	-61.2018	-61.2626	-60.5477	-58.7826	-60.242
1407	-59.4367	-64.4855	-63.953	-61.1755	-61.2264	-60.5641	-58.7563	-60.2026
1408	-59.4236	-64.5611	-63.861	-61.1985	-61.2232	-60.5115	-58.7793	-60.2617
1409	-59.3184	-64.4855	-63.8347	-61.284	-61.2133	-60.5674	-58.8648	-60.2749
1410	-59.3644	-64.5085	-63.8643	-61.376	-61.279	-60.6036	-58.73	-60.3735
1411	-59.2198	-64.3803	-63.8971	-61.4056	-61.2166	-60.5707	-58.753	-60.2946
1412	-59.1705	-64.4888	-63.9793	-61.4516	-61.1903	-60.5083	-58.8516	-60.3242
1413	-59.085	-64.423	-63.8971	-61.593	-61.279	-60.6167	-58.7366	-60.2946
1414	-59.1836	-64.423	-63.861	-61.5469	-61.2002	-60.5083	-58.8385	-60.3176
1415	-59.1606	-64.4165	-63.7952	-61.5864	-61.256	-60.6134	-58.8286	-60.4162
1416	-59.1474	-64.3935	-63.7689	-61.6653	-61.3415	-60.6595	-58.7694	-60.2749
1417	-59.1803	-64.4526	-63.8018	-61.8592	-61.3448	-60.6693	-58.8188	-60.3406
1418	-59.177	-64.4329	-63.7919	-61.7376	-61.2527	-60.551	-58.7432	-60.3603
1419	-59.2132	-64.4954	-63.7689	-61.8428	-61.2363	-60.7383	-58.7201	-60.3998
1420	-59.2132	-64.5052	-63.8544	-61.8493	-61.1278	-60.712	-58.6708	-60.3603
1421	-59.2461	-64.6367	-63.8675	-61.8362	-61.0292	-60.7285	-58.8549	-60.3045
1422	-59.2724	-64.6433	-63.8314	-61.8198	-60.9273	-60.6562	-58.8418	-60.3308
1423	-59.2033	-64.7254	-63.8347	-61.846	-60.8386	-60.6627	-58.7103	-60.2979
1424	-59.1113	-64.6466	-63.838	-61.7836	-60.7038	-60.6595	-58.6347	-60.3012
1425	-59.1146	-64.571	-63.8445	-61.8132	-60.694	-60.6365	-58.6676	-60.3538
1426	-59.085	-64.6531	-63.8281	-61.754	-60.5954	-60.6397	-58.6708	-60.3932
1427	-59.1606	-64.594	-63.8314	-61.8691	-60.7137	-60.6989	-58.7136	-60.4392
1428	-59.0883	-64.6104	-63.7426	-61.7869	-60.6742	-60.7745	-58.6478	-60.4064
1429	-59.0225	-64.6301	-63.8938	-61.7639	-60.5756	-60.712	-58.6939	-60.3735
1430	-59.0554	-64.5874	-63.93	-61.7244	-60.5756	-60.7614	-58.7234	-60.5181
1431	-59.0883	-64.6794	-63.9201	-61.7573	-60.5066	-60.8008	-58.7169	-60.4984
1432	-59.131	-64.5874	-63.8708	-61.4943	-60.4474	-60.7548	-58.6741	-60.5313
1433	-59.1047	-64.6531	-63.7821	-61.4188	-60.3554	-60.7153	-58.7234	-60.5707
1434	-59.1474	-64.6433	-63.861	-61.33	-60.3193	-60.7745	-58.7201	-60.5806
1435	-59.0949	-64.6367	-63.9464	-61.2675	-60.293	-60.8107	-58.7563	-60.4721
1436	-59.2132	-64.6728	-63.9037	-61.2117	-60.1582	-60.7186	-58.6971	-60.5148
1437	-59.2789	-64.6104	-63.7919	-61.0933	-60.0464	-60.7088	-58.615	-60.4754
1438	-59.2066	-64.7419	-63.838	-60.9421	-60.0234	-60.8632	-58.6676	-60.4129
1439	-59.2724	-64.6235	-63.8314	-60.8632	-59.8788	-60.8863	-58.6445	-60.4425
1440	-59.3447	-64.571	-63.7525	-60.6858	-59.8887	-60.8534	-58.6413	-60.3669
1441	-59.3447	-64.663	-63.7854	-60.7153	-60.0201	-60.8008	-58.638	-60.4557
1442	-59.4203	-64.5742	-63.838	-60.6003	-60.0399	-60.8764	-58.6445	-60.5576
1443	-59.4367	-64.6926	-63.6868	-60.4261	-60.099	-60.9323	-58.7432	-60.6003
1444	-59.4729	-64.6926	-63.6309	-60.4294	-60.0333	-60.8928	-58.6774	-60.5477
1445	-59.5517	-64.7813	-63.4863	-60.2782	-59.9873	-60.9027	-58.5854	-60.5148
1446	-59.5452	-64.7747	-63.3548	-60.265	-59.9906	-60.9323	-58.7004	-60.5674
1447	-59.5254	-64.8306	-63.2463	-60.1171	-59.8558	-60.9356	-58.7727	-60.5477
1448	-59.509	-64.8043	-63.0129	-59.9495	-59.7868	-61.067	-58.6018	-60.62
1449	-59.5189	-64.9457	-62.9176	-59.8377	-59.9314	-60.9651	-58.7694	-60.6299
1450	-59.5517	-64.8273	-62.6777	-59.6964	-59.9248	-61.0375	-58.799	-60.5871
1451	-59.4762	-64.8339	-62.5034	-59.7391	-60.0497	-61.0572	-58.8352	-60.6134
1452	-59.6011	-64.8832	-62.3062	-59.6142	-60.2864	-61.0243	-58.7234	-60.6069
1453	-59.4959	-64.8273	-62.0597	-59.486	-60.1878	-60.9356	-58.776	-60.6332
1454	-59.4992	-64.9292	-61.9151	-59.4597	-60.3883	-60.9684	-58.73	-60.6102
1455	-59.4959	-64.9259	-61.7606	-59.4005	-60.3948	-61.021	-58.7497	-60.7318
1456	-59.5123	-64.8273	-61.5075	-59.2461	-60.4376	-61.0144	-58.799	-60.6825
1457	-59.4794	-64.9391	-61.3267	-59.2789	-60.4737	-61.0703	-58.73	-60.6134
1458	-59.578	-64.8668	-61.1525	-59.2658	-60.2732	-61.0572	-58.7727	-60.7942
1459	-59.4038	-64.9161	-61.0407	-59.131	-60.3455	-61.0309	-58.8582	-60.7416
1460	-59.44	-64.9457	-60.86	-59.0949	-60.4474	-61.0605	-58.8615	-60.7186
1461	-59.4531	-64.9227	-60.6595	-59.1179	-60.4869	-61.0638	-58.7727	-60.7548
1462	-59.4597	-64.9785	-60.4327	-59.0127	-60.5362	-61.1426	-58.8023	-60.7252
1463	-59.4794	-64.8898	-60.288	-58.9437	-60.5461	-61.1788	-58.8615	-60.7614
1464	-59.3775	-64.9851	-60.1401	-58.8681	-60.4869	-61.1163	-58.8122	-60.7351
1465	-59.4236	-64.9654	-60.0481	-58.8549	-60.5362	-61.0933	-58.8582	-60.7186
1466	-59.4499	-64.9259	-59.8311	-58.8385	-60.5559	-61.1163	-58.799	-60.7252
1467	-59.4104	-64.9753	-59.6964	-58.8385	-60.5691	-61.1788	-58.776	-60.7548
1468	-59.4729	-65.018	-59.5616	-58.8122	-60.5395	-61.0473	-58.8451	-60.7548
1469	-59.4564	-64.949	-59.3282	-58.9601	-60.6085	-61.0506	-58.7925	-60.6693
1470	-59.4597	-64.9687	-59.1803	-58.7892	-60.4606	-61.1229	-58.7596	-60.7416
1471	-59.2822	-64.9259	-59.1244	-58.8746	-60.454	-61.1361	-58.8582	-60.6726
1472	-59.2822	-64.9555	-58.9897	-58.8812	-60.4836	-61.1985	-58.6939	-60.8139
1473	-59.3282	-64.8635	-58.9831	-58.8253	-60.4409	-61.2117	-58.73	-60.7351
1474	-59.3775	-64.9128	-58.8976	-58.8056	-60.4376	-61.0835	-58.8023	-60.6989
1475	-59.3118	-64.8109	-58.8615	-58.8648	-60.5493	-61.1657	-58.8056	-60.712
1476	-59.2296	-64.778	-58.6741	-58.7727	-60.5165	-61.2643	-58.8681	-60.8041
1477	-59.2066	-64.8438	-58.5755	-58.822	-60.3784	-61.2938	-58.8418	-60.8468
1478	-59.3019	-64.8076	-58.6577	-58.7694	-60.4047	-61.2544	-58.8976	-60.689
1479	-59.3184	-64.8602	-58.592	-58.6939	-60.5723	-61.2347	-58.8253	-60.8238
1480	-59.2231	-64.8372	-58.4769	-58.6445	-60.5296	-61.3136	-58.8976	-60.7581
1481	-59.0916	-64.7452	-58.4605	-58.7004	-60.671	-61.2084	-58.8878	-60.7548
1482	-59.1606	-64.7287	-58.3849	-58.6084	-60.6414	-61.261	-58.8648	-60.86
1483	-59.1212	-64.7616	-58.2863	-58.4671	-60.6644	-61.1591	-58.9469	-60.8435
1484	-59.0291	-64.6663	-58.375	-58.352	-60.5526	-61.2478	-58.8549	-60.8863
1485	-59.0686	-64.5874	-58.3323	-58.3619	-60.5855	-61.2511	-58.9601	-60.8534
1486	-59.016	-64.5808	-58.214	-58.2731	-60.5	-61.2544	-58.9502	-60.8008
1487	-59.0521	-64.6137	-58.237	-58.237	-60.6052	-61.2018	-58.9207	-60.8107
1488	-58.9864	-64.5479	-58.1318	-58.2041	-60.5986	-61.261	-58.8746	-60.8238
1489	-58.9371	-64.5315	-58.1712	-58.214	-60.6742	-61.1821	-58.8648	-60.7088
1490	-58.8253	-64.4986	-58.1186	-58.2238	-60.7794	-61.3333	-58.9239	-60.8632
1491	-58.8023	-64.4625	-58.043	-58.1778	-60.8879	-61.1952	-58.9371	-60.8928
1492	-58.7399	-64.3442	-57.9017	-58.066	-60.878	-61.2675	-58.7497	-60.7416
1493	-58.5788	-64.285	-57.8425	-58.0365	-60.7564	-61.2117	-58.8483	-60.9158
1494	-58.5295	-64.2094	-57.7604	-58.0299	-60.8583	-61.2675	-58.9338	-60.8665
1495	-58.4671	-64.1765	-57.6946	-57.928	-60.9471	-61.261	-58.8911	-60.9914
1496	-58.3158	-64.0943	-57.5861	-57.9937	-60.8978	-61.2018	-58.8878	-60.9684
1497	-58.1679	-63.9924	-57.4415	-57.9904	-61.0128	-61.1722	-58.9272	-61.0276
1498	-58.0858	-63.9957	-57.4087	-58.0036	-61.0029	-61.1328	-58.8746	-60.9487
1499	-58.1318	-63.9234	-57.2476	-57.9346	-60.9766	-61.2741	-58.9174	-61.0013
1500	-57.9806	-63.9366	-57.2114	-57.9181	-61.0687	-61.2774	-58.97	-60.9717
1501	-57.951	-63.8741	-57.2574	-57.8853	-60.9799	-61.261	-58.9798	-60.9684
1502	-57.9181	-63.7952	-57.1786	-57.9181	-60.8846	-61.3168	-58.9305	-60.9487
1503	-57.7242	-63.7032	-57.1227	-57.9346	-60.6677	-61.2774	-59.0554	-60.9224
1504	-57.6782	-63.7065	-57.0537	-57.9543	-60.786	-61.376	-59.016	-60.9323
1505	-57.596	-63.6112	-56.9781	-57.9313	-60.9734	-61.3431	-59.0686	-60.9619
1506	-57.6519	-63.6013	-56.9978	-58.0266	-60.9931	-61.1887	-59.0587	-61.0966
1507	-57.573	-63.644	-57.0142	-58.0463	-61.1015	-61.2511	-59.1113	-60.9717
1508	-57.5204	-63.4764	-57.0274	-58.0233	-61.0621	-61.2873	-59.1014	-61.0243
1509	-57.3232	-63.3646	-56.9583	-58.0792	-61.0785	-61.3234	-59.0357	-60.975
1510	-57.3824	-63.3613	-57.0076	-58.1712	-60.9273	-61.2544	-59.1179	-60.975
1511	-57.3002	-63.2463	-56.9485	-58.0956	-60.9635	-61.2741	-59.0686	-61.0473
1512	-57.2903	-63.2463	-56.9715	-58.0891	-60.7959	-61.2577	-59.1244	-61.0342
1513	-57.2969	-63.1378	-56.9715	-58.0102	-60.9109	-61.2511	-59.0817	-61.0309
1514	-57.3856	-63.0557	-56.9485	-58.0858	-60.878	-61.1032	-59.2033	-61.0572
1515	-57.3002	-63.0096	-56.9813	-57.9609	-60.8452	-61.1854	-59.1869	-61.1163
1516	-57.287	-63.0129	-57.0701	-58.0463	-60.8287	-61.2084	-59.2	-61.1295
1517	-57.2772	-62.888	-57.1128	-57.9904	-60.8254	-61.2347	-59.2066	-61.1131
1518	-57.3298	-62.8289	-57.1687	-57.9707	-60.8682	-61.284	-59.3217	-61.1689
1519	-57.2443	-62.8716	-57.1523	-57.9839	-60.9273	-61.215	-59.2165	-61.1394
1520	-57.3429	-62.7401	-57.1818	-58.0891	-60.9405	-61.1722	-59.2263	-61.067
1521	-57.3232	-62.5462	-57.1983	-58.0496	-60.7794	-61.2182	-59.2296	-61.0407
1522	-57.2049	-62.4903	-57.3199	-58.0956	-60.9142	-61.2051	-59.3052	-61.1163
1523	-57.2443	-62.2668	-57.4875	-58.0792	-60.8682	-61.3037	-59.1935	-61.0933
1524	-57.2147	-62.2504	-57.55	-57.9806	-60.8452	-61.2511	-59.2921	-61.1229
1525	-57.2213	-62.0794	-57.5566	-57.9609	-60.9602	-61.2018	-59.2592	-61.0868
1526	-57.264	-61.9545	-57.7341	-57.9773	-61.0654	-61.2248	-59.3743	-61.0868
1527	-57.1556	-61.8165	-57.6716	-58.0693	-61.0292	-61.2215	-59.2165	-61.0473
1528	-57.0898	-61.7047	-57.7998	-58.1055	-60.8452	-61.3497	-59.3151	-61.0243
1529	-57.1358	-61.5437	-57.9181	-58.0595	-60.9438	-61.261	-59.3052	-61.0013
1530	-57.1358	-61.3267	-57.9707	-58.066	-60.9339	-61.2182	-59.3217	-60.8928
1531	-56.9879	-61.1755	-58.0496	-58.0332	-60.8353	-61.2445	-59.2724	-61.0342
1532	-57.1293	-61.1295	-58.0726	-57.9937	-60.9405	-61.1229	-59.2756	-61.0506
1533	-56.9649	-60.9487	-58.0858	-58.1416	-60.9964	-61.0638	-59.3151	-61.0966
1534	-57.0832	-60.8304	-58.0595	-58.0956	-60.8616	-61.1854	-59.3381	-61.0736
1535	-57.0438	-60.86	-58.1055	-58.1647	-60.9734	-61.215	-59.4334	-61.0473
1536	-57.1293	-60.689	-58.2238	-58.1186	-61.0358	-61.2117	-59.3973	-61.0933
1537	-56.9649	-60.5871	-58.1844	-58.1121	-61.1147	-61.1755	-59.4104	-60.9684
1538	-57.0011	-60.3636	-58.2994	-58.1515	-61.0851	-61.2084	-59.4334	-61.0309
1539	-56.9156	-60.3472	-58.2238	-58.1844	-61.0325	-61.2971	-59.463	-61.044
1540	-56.8334	-60.2617	-58.26	-58.2304	-61.1706	-61.2643	-59.509	-61.0144
1541	-56.8663	-60.196	-58.1088	-58.2074	-61.1903	-61.2314	-59.3545	-61.021
1542	-56.8696	-60.1697	-58.1778	-58.1416	-61.1706	-61.2182	-59.394	-60.906
1543	-56.9551	-60.1204	-58.2074	-58.1877	-61.2232	-61.2314	-59.3512	-61.0868
1544	-56.8762	-60.0021	-58.2337	-58.1844	-61.1048	-61.1689	-59.3184	-60.9717
1545	-56.886	-59.8016	-58.1844	-58.2107	-61.1903	-61.2314	-59.3874	-61.09
1546	-56.863	-59.6931	-58.1515	-58.2698	-61.1443	-61.2314	-59.4137	-61.1065
1547	-56.9156	-59.6011	-58.1581	-58.2896	-61.1443	-61.2412	-59.3973	-60.9849
1548	-56.9288	-59.4597	-58.0496	-58.3882	-61.1443	-61.1722	-59.371	-61.0572
1549	-56.9682	-59.2724	-58.1252	-58.3487	-61.2363	-61.1295	-59.4531	-60.9323
1550	-57.0076	-59.1113	-58.0266	-58.3158	-61.0489	-61.1624	-59.4762	-61.0506
1551	-56.9353	-58.9831	-58.1121	-58.2961	-61.0128	-61.1722	-59.5057	-61.044
1552	-56.9025	-58.776	-58.0792	-58.3619	-61.072	-61.1919	-59.5945	-61.1065
1553	-56.9386	-58.7169	-57.974	-58.4079	-61.0588	-61.238	-59.5846	-61.0013
1554	-56.9616	-58.4999	-57.8853	-58.3652	-61.1245	-61.1854	-59.5156	-61.0079
1555	-56.9912	-58.3652	-57.9477	-58.4605	-61.0917	-61.1657	-59.4564	-61.0473
1556	-56.9288	-58.2633	-57.974	-58.5131	-61.0128	-61.2117	-59.4696	-61.0473
1557	-56.9288	-58.1022	-57.9872	-58.4309	-61.187	-61.215	-59.5024	-61.1328
1558	-56.9978	-57.9379	-57.8787	-58.5525	-61.2659	-61.2051	-59.5682	-61.1196
1559	-56.9846	-57.8031	-58.0003	-58.6084	-61.187	-61.1657	-59.4827	-61.1558
1560	-56.9123	-57.8228	-57.9674	-58.5657	-61.1245	-61.1624	-59.5353	-61.0506
1561	-57.0372	-57.8097	-57.9674	-58.6906	-61.0062	-61.2544	-59.5287	-61.0407
1562	-56.9879	-57.6782	-57.9872	-58.6643	-60.878	-61.2445	-59.4301	-61.0802
1563	-56.8959	-57.711	-58.0036	-58.753	-60.8945	-61.2774	-59.4663	-61.0079
1564	-56.9846	-57.5434	-57.9247	-58.6939	-60.8484	-61.2544	-59.5616	-61.0243
1565	-57.0274	-57.5303	-58.043	-58.73	-60.7959	-61.1985	-59.5222	-60.9882
1566	-57.1063	-57.4382	-57.9379	-58.7267	-60.7926	-61.1394	-59.5517	-61.1032
1567	-57.0734	-57.4678	-58.043	-58.7596	-60.7893	-61.2215	-59.4926	-61.0112
1568	-57.1325	-57.527	-57.9444	-58.8385	-60.8419	-61.1492	-59.4893	-61.0638
1569	-57.1621	-57.5664	-58.1055	-58.8549	-60.7696	-61.2314	-59.4038	-60.8895
1570	-57.1293	-57.6782	-58.0167	-58.8286	-60.6808	-61.2511	-59.394	-60.9816
1571	-57.172	-57.5861	-58.043	-58.799	-60.6019	-61.2445	-59.4334	-61.0144
1572	-57.2509	-57.8064	-58.1679	-58.7826	-60.4376	-61.2708	-59.5189	-60.9553
1573	-57.2246	-57.8491	-58.1219	-58.8549	-60.3685	-61.2971	-59.463	-60.9651
1574	-57.2016	-57.951	-58.1712	-58.8089	-60.2568	-61.3366	-59.3874	-61.021
1575	-57.3626	-58.0726	-58.1449	-58.799	-60.1943	-61.2741	-59.4071	-61.0769
1576	-57.4054	-58.214	-58.1022	-58.7793	-60.1122	-61.4155	-59.6175	-61.0473
1577	-57.4448	-58.1811	-58.2304	-58.7662	-59.9347	-61.3333	-59.5419	-60.9849
1578	-57.4481	-58.1515	-58.3027	-58.7004	-59.915	-61.3596	-59.5222	-60.998
1579	-57.5401	-58.3356	-58.3027	-58.7267	-59.9511	-61.2873	-59.4992	-60.9651
1580	-57.5237	-58.2994	-58.2731	-58.7727	-59.8821	-61.3136	-59.5485	-60.952
1581	-57.55	-58.2731	-58.4802	-58.6807	-59.8163	-61.3662	-59.486	-60.9849
1582	-57.527	-58.26	-58.4539	-58.638	-59.7835	-61.422	-59.4926	-60.9684
1583	-57.619	-58.3356	-58.4934	-58.6314	-59.7473	-61.2971	-59.5024	-60.8895
1584	-57.7571	-58.283	-58.5525	-58.6741	-59.7802	-61.4023	-59.4301	-60.8961
1585	-57.6815	-58.3421	-58.5854	-58.6478	-59.7539	-61.4155	-59.4926	-60.9586
1586	-57.7012	-58.398	-58.6215	-58.7366	-59.6882	-61.3826	-59.4499	-60.9849
1587	-57.6519	-58.3783	-58.7103	-58.6741	-59.7473	-61.4089	-59.4334	-60.9158
1588	-57.6585	-58.4046	-58.8023	-58.7793	-59.7999	-61.5272	-59.4236	-60.9224
1589	-57.8228	-58.3652	-58.8812	-58.7826	-59.7342	-61.3464	-59.463	-60.8205
1590	-57.8622	-58.3783	-59.0225	-58.8483	-59.6421	-61.4385	-59.4992	-60.837
1591	-57.9477	-58.398	-59.0751	-58.8714	-59.6914	-61.4253	-59.5156	-60.8008
1592	-58.0397	-58.3619	-59.0225	-58.9305	-59.5008	-61.4746	-59.4367	-60.8139
1593	-58.043	-58.3323	-58.9995	-58.9634	-59.6323	-61.5108	-59.5682	-60.7614
1594	-58.1416	-58.3816	-58.9437	-59.0916	-59.5238	-61.4549	-59.5024	-60.7482
1595	-58.0891	-58.4605	-59.1113	-59.0916	-59.4778	-61.4878	-59.6076	-60.8271
1596	-58.0726	-58.3191	-59.1442	-59.0653	-59.4745	-61.4943	-59.5156	-60.7318
1597	-58.2337	-58.3487	-59.1968	-59.0423	-59.537	-61.4976	-59.5057	-60.7482
1598	-58.2534	-58.3126	-59.348	-59.1705	-59.4909	-61.4648	-59.5123	-60.7515
1599	-58.2896	-58.2665	-59.4334	-59.2099	-59.4975	-61.5502	-59.4663	-60.7252
1600	-58.2994	-58.2633	-59.3611	-59.2231	-59.5698	-61.4943	-59.4564	-60.7581
1601	-58.2961	-58.1482	-59.5945	-59.2296	-59.6947	-61.593	-59.4663	-60.7844
1602	-58.5394	-58.1614	-59.7128	-59.4104	-59.7375	-61.6488	-59.4926	-60.7778
1603	-58.5492	-58.0825	-59.6208	-59.2592	-59.8591	-61.6455	-59.5057	-60.666
1604	-58.6643	-58.1482	-59.7523	-59.3282	-59.6783	-61.6193	-59.4301	-60.6332
1605	-58.7366	-58.0134	-59.6832	-59.3743	-59.5797	-61.6948	-59.4433	-60.6266
1606	-58.7497	-58.0562	-59.7555	-59.4236	-59.5994	-61.7376	-59.5846	-60.6792
1607	-58.73	-57.9214	-59.795	-59.5222	-59.5895	-61.5798	-59.4663	-60.6003
1608	-58.8188	-57.9116	-59.9002	-59.6076	-59.6389	-61.5995	-59.5353	-60.6134
1609	-58.8483	-57.8195	-59.8673	-59.5649	-59.6093	-61.6948	-59.5715	-60.6069
1610	-58.8911	-57.8655	-59.9791	-59.4696	-59.7506	-61.5502	-59.4301	-60.6036
1611	-58.7793	-57.8031	-59.9955	-59.6274	-59.7539	-61.6291	-59.4729	-60.5346
1612	-58.9207	-57.8261	-59.9659	-59.5846	-59.8492	-61.5798	-59.5189	-60.5904
1613	-58.9732	-57.8524	-59.9659	-59.7095	-59.8426	-61.7113	-59.394	-60.5313
1614	-58.9568	-57.7899	-60.1664	-59.6865	-59.7901	-61.7211	-59.463	-60.5181
1615	-59.1014	-57.8458	-60.1434	-59.7851	-59.767	-61.662	-59.4499	-60.5181
1616	-59.108	-57.8491	-60.0908	-59.9265	-59.7243	-61.7113	-59.5222	-60.4622
1617	-59.0981	-57.9543	-60.0908	-59.9396	-59.7901	-61.6127	-59.4597	-60.4162
1618	-59.1639	-57.9411	-60.1105	-59.9462	-59.8624	-61.6521	-59.348	-60.3932
1619	-59.2395	-57.8853	-60.2091	-59.9823	-59.8394	-61.7737	-59.4236	-60.4885
1620	-59.2099	-57.9444	-60.2453	-60.1368	-59.9281	-61.7014	-59.3775	-60.3965
1621	-59.2231	-58.0463	-60.3143	-60.0777	-60.03	-61.7277	-59.4236	-60.4162
1622	-59.2789	-58.066	-60.2157	-60.1303	-60.1648	-61.7343	-59.4893	-60.3472
1623	-59.2855	-58.1088	-60.2847	-60.1303	-60.2206	-61.7705	-59.4104	-60.3406
1624	-59.2987	-58.1942	-60.219	-60.1598	-60.4047	-61.6883	-59.4367	-60.3801
1625	-59.4268	-58.26	-60.2946	-60.1467	-60.4737	-61.8165	-59.555	-60.3899
1626	-59.417	-58.375	-60.2387	-60.1434	-60.6348	-61.6225	-59.3677	-60.3636
1627	-59.4466	-58.3914	-60.2552	-60.1598	-60.7466	-61.708	-59.4071	-60.3636
1628	-59.5222	-58.4966	-60.1927	-60.1993	-60.7991	-61.7014	-59.4236	-60.2749
1629	-59.4236	-58.5624	-60.3012	-60.1467	-60.7794	-61.708	-59.4367	-60.3242
1630	-59.44	-58.6084	-60.265	-60.1072	-60.763	-61.7836	-59.417	-60.2979
1631	-59.4893	-58.6971	-60.2847	-60.1105	-60.9208	-61.7179	-59.463	-60.3932
1632	-59.463	-58.6314	-60.2782	-60.0284	-60.9865	-61.7113	-59.4137	-60.4162
1633	-59.5057	-58.6873	-60.3866	-59.9659	-60.9964	-61.7376	-59.3874	-60.3834
1634	-59.4663	-58.6971	-60.2913	-59.8903	-61.0654	-61.777	-59.486	-60.3472
1635	-59.5452	-58.7859	-60.4031	-59.8246	-61.0522	-61.8033	-59.4334	-60.4491
1636	-59.5715	-58.8845	-60.3636	-59.8673	-61.1015	-61.8066	-59.4038	-60.3505
1637	-59.6208	-58.8812	-60.4458	-59.8344	-61.164	-61.8395	-59.5189	-60.2617
1638	-59.6011	-59.016	-60.4392	-59.8673	-61.1476	-61.7803	-59.5057	-60.3669
1639	-59.6438	-59.0324	-60.5148	-59.7457	-61.0621	-61.8	-59.5386	-60.3308
1640	-59.6372	-59.1277	-60.4721	-59.7785	-61.0687	-61.7409	-59.5156	-60.3439
1641	-59.6832	-59.2296	-60.6069	-59.8574	-61.0917	-61.8198	-59.5057	-60.3275
1642	-59.7588	-59.2756	-60.597	-59.8114	-60.9109	-61.9545	-59.6142	-60.2979
1643	-59.7687	-59.4104	-60.6989	-59.7621	-60.855	-61.9479	-59.6569	-60.3538
1644	-59.7851	-59.3677	-60.7153	-59.7851	-60.855	-61.9808	-59.532	-60.3603
1645	-59.8311	-59.4663	-60.7252	-59.7687	-60.8649	-61.8986	-59.6799	-60.3768
1646	-59.8377	-59.6011	-60.7581	-59.7884	-60.8682	-61.6916	-59.6142	-60.2617
1647	-60.0382	-59.6767	-60.7778	-59.7424	-60.9273	-61.8986	-59.5846	-60.3078
1648	-59.9495	-59.7523	-60.8961	-59.6208	-60.8978	-61.8493	-59.5419	-60.3538
1649	-59.9528	-59.7654	-60.9717	-59.6536	-60.9175	-61.8526	-59.5517	-60.3735
1650	-60.0514	-59.9035	-60.9421	-59.6964	-60.9405	-61.8395	-59.5682	-60.2552
1651	-59.9988	-59.9528	-60.9027	-59.6471	-60.8123	-61.685	-59.6964	-60.2387
1652	-60.0251	-59.9265	-61.0243	-59.6865	-60.7696	-61.8592	-59.6767	-60.4195
1653	-60.081	-60.0645	-60.9882	-59.7194	-60.6315	-61.8428	-59.6372	-60.2289
1654	-59.9955	-60.1072	-60.9421	-59.6734	-60.5789	-61.9151	-59.6241	-60.2683
1655	-60.0316	-60.15	-61.0079	-59.6142	-60.477	-61.9479	-59.726	-60.3373
1656	-60.0579	-60.2716	-60.9816	-59.5682	-60.4474	-61.8559	-59.7095	-60.288
1657	-59.9889	-60.3932	-61.021	-59.486	-60.4277	-61.9479	-59.6635	-60.3834
1658	-60.1368	-60.4359	-61.0638	-59.4301	-60.2535	-61.9052	-59.726	-60.3209
1659	-60.1796	-60.4787	-61.1032	-59.3315	-60.2305	-61.8526	-59.7785	-60.3012
1660	-60.1303	-60.5707	-61.0933	-59.3447	-60.1483	-61.9677	-59.6438	-60.2584
1661	-60.1303	-60.6595	-61.1624	-59.2362	-60.0892	-61.823	-59.726	-60.3998
1662	-60.1894	-60.7088	-61.0933	-59.0949	-60.0399	-61.9052	-59.7128	-60.3571
1663	-60.1763	-60.7285	-61.2675	-59.039	-60.0464	-61.9545	-59.8114	-60.4096
1664	-60.1434	-60.7252	-61.2248	-58.9437	-60.0431	-62.017	-59.8246	-60.2946
1665	-60.1368	-60.9191	-61.2084	-58.9371	-60.1483	-61.9677	-59.8311	-60.2059
1666	-60.1697	-60.9619	-61.3234	-58.6445	-60.1943	-61.9249	-59.7753	-60.2683
1667	-60.0645	-60.9224	-61.3136	-58.638	-60.053	-61.9742	-59.8607	-60.3406
1668	-60.1237	-61.0243	-61.3563	-58.6018	-60.0826	-61.9545	-59.9758	-60.3636
1669	-60.2124	-61.1328	-61.3629	-58.4966	-60.2864	-61.8855	-59.8903	-60.3834
1670	-60.1828	-61.1657	-61.3826	-58.283	-60.1615	-61.9085	-59.864	-60.3209
1671	-60.173	-61.2018	-61.3103	-58.2403	-60.1516	-61.846	-59.7983	-60.3012
1672	-60.2289	-61.1821	-61.4582	-58.0891	-60.0497	-61.9348	-59.9166	-60.2354
1673	-60.219	-61.1624	-61.3366	-58.0562	-59.8328	-62.0367	-59.9199	-60.3899
1674	-60.1007	-61.2248	-61.5338	-57.9904	-59.7605	-61.9118	-59.9856	-60.3209
1675	-60.1467	-61.1919	-61.5141	-57.9214	-59.7112	-61.8789	-59.9626	-60.3176
1676	-60.0349	-61.4023	-61.5798	-57.836	-59.583	-61.9447	-59.8837	-60.2782
1677	-60.0875	-61.4155	-61.5699	-57.7735	-59.537	-61.8066	-59.9363	-60.3373
1678	-60.0711	-61.3859	-61.5042	-57.5993	-59.6323	-61.9348	-60.0054	-60.2289
1679	-60.0316	-61.4845	-61.5831	-57.5993	-59.5797	-61.8822	-59.9725	-60.3012
1680	-60.104	-61.4943	-61.6488	-57.5894	-59.5665	-61.8099	-60.0645	-60.3538
1681	-60.0021	-61.4976	-61.7211	-57.4481	-59.6093	-61.9545	-60.0711	-60.2354
1682	-59.9725	-61.6258	-61.777	-57.4744	-59.5567	-61.9184	-60.0185	-60.2683
1683	-59.9955	-61.6587	-61.8559	-57.3232	-59.5797	-61.9019	-60.0316	-60.3209
1684	-60.0579	-61.6883	-61.823	-57.3166	-59.6914	-61.9282	-60.0678	-60.2059
1685	-59.9659	-61.8329	-61.9282	-57.3495	-59.629	-61.9479	-60.0086	-60.1763
1686	-59.9363	-61.8329	-61.9775	-57.2772	-59.6389	-61.8888	-59.9922	-60.2782
1687	-60.0119	-61.9085	-61.9118	-57.2837	-59.5567	-61.846	-59.9922	-60.2157
1688	-60.0744	-61.9315	-61.9447	-57.2509	-59.7013	-61.9019	-60.1401	-60.1861
1689	-60.0021	-61.9841	-62.0959	-57.3626	-59.6684	-61.777	-60.1072	-60.1598
1690	-60.2026	-62.0827	-62.0926	-57.2016	-59.7539	-61.7803	-60.0908	-60.1993
1691	-60.1237	-62.1912	-62.0433	-57.1621	-59.8426	-61.8165	-60.0678	-60.1105
1692	-60.1171	-62.1682	-62.1189	-57.2377	-59.7572	-61.708	-60.0415	-60.2289
1693	-60.1303	-62.1715	-62.2306	-57.0767	-59.8131	-61.8658	-60.0481	-60.0974
1694	-60.2486	-62.2306	-62.1945	-57.1687	-59.8163	-61.8362	-60.104	-60.1664
1695	-60.2782	-62.2471	-62.2043	-57.1588	-59.7835	-61.7836	-60.0448	-60.219
1696	-60.2157	-62.2372	-62.2372	-57.1523	-59.9314	-61.8822	-60.0316	-60.104
1697	-60.2815	-62.1879	-62.3325	-57.218	-59.9413	-61.7573	-60.0547	-60.0842
1698	-60.1927	-62.2635	-62.4246	-57.1293	-59.9643	-61.8198	-59.9035	-60.0316
1699	-60.3143	-62.2602	-62.487	-57.1457	-59.938	-61.7639	-59.9823	-59.9889
1700	-60.3834	-62.2043	-62.464	-57.1687	-59.9018	-61.7606	-59.9363	-60.0086
1701	-60.4425	-62.2273	-62.4541	-57.1523	-60.0464	-61.8329	-60.0415	-60.0547
1702	-60.4655	-62.3095	-62.4673	-57.1523	-60.099	-61.731	-59.9659	-60.127
1703	-60.4688	-62.3687	-62.5067	-57.0043	-60.0826	-61.7442	-59.9889	-59.9626
1704	-60.4852	-62.3457	-62.556	-56.9353	-60.03	-61.7244	-59.9955	-60.0974
1705	-60.5773	-62.3818	-62.4443	-56.886	-59.9971	-61.7277	-60.0842	-60.1105
1706	-60.6299	-62.418	-62.464	-56.6724	-59.8163	-61.754	-60.0119	-60.0612
1707	-60.6299	-62.3424	-62.5265	-56.6789	-59.8558	-61.7836	-59.9758	-60.0349
1708	-60.5904	-62.4246	-62.4936	-56.4521	-59.8624	-61.6784	-59.956	-59.9593
1709	-60.7285	-62.4311	-62.4969	-56.4357	-59.6651	-61.7179	-59.9396	-60.1237
1710	-60.7614	-62.5297	-62.4278	-56.3503	-59.5501	-61.7672	-60.0711	-59.9725
1711	-60.7712	-62.4837	-62.6283	-56.2714	-59.3956	-61.6916	-59.9659	-60.0382
1712	-60.8304	-62.5495	-62.6809	-56.2023	-59.4121	-61.6554	-59.9955	-59.9791
1713	-60.8501	-62.5166	-62.6678	-56.0741	-59.3069	-61.6718	-59.9791	-59.9955
1714	-61.0506	-62.4673	-62.7237	-55.8441	-59.3365	-61.6883	-60.0612	-60.0119
1715	-61.0506	-62.6316	-62.6514	-55.8605	-59.2444	-61.7672	-60.0349	-60.0185
1716	-61.0276	-62.6579	-62.7894	-55.992	-59.2773	-61.6948	-59.9823	-59.9528
1717	-61.0375	-62.6579	-62.6875	-55.7454	-59.1425	-61.6554	-60.0185	-60.0514
1718	-61.1032	-62.6546	-62.7927	-55.821	-59.1787	-61.6883	-60.0941	-60.0349
1719	-61.1854	-62.6809	-62.9439	-55.6468	-59.1392	-61.6357	-59.9823	-59.9889
1720	-61.0802	-62.6809	-62.8387	-55.6271	-58.9782	-61.616	-60.0579	-59.9462
1721	-61.1854	-62.5823	-62.9176	-55.5515	-58.9946	-61.7179	-60.0054	-59.9396
1722	-61.2347	-62.6908	-62.9143	-55.6567	-58.9059	-61.7277	-60.0218	-59.9889
1723	-61.2314	-62.7072	-62.9932	-55.6468	-58.9157	-61.6258	-60.0908	-59.9659
1724	-61.3103	-62.7828	-63.0294	-55.5285	-58.8467	-61.6127	-60.0842	-60.104
1725	-61.3859	-62.8321	-62.9866	-55.5318	-58.8533	-61.6127	-60.0842	-60.0251
1726	-61.261	-62.7763	-63.0524	-55.5351	-58.6889	-61.6225	-59.9396	-59.9922
1727	-61.376	-62.8321	-63.1444	-55.4628	-58.6692	-61.5404	-59.9626	-60.0481
1728	-61.3662	-62.911	-63.1444	-55.4924	-58.6988	-61.593	-59.887	-60.0415
1729	-61.3925	-62.8782	-63.266	-55.4135	-58.6791	-61.5601	-59.9396	-60.0875
1730	-61.3793	-63.0096	-63.289	-55.4168	-58.6265	-61.5239	-59.9593	-60.1796
1731	-61.4418	-62.8979	-63.2759	-55.4365	-58.6199	-61.5371	-59.9166	-60.0382
1732	-61.5601	-62.9833	-63.2857	-55.4956	-58.6232	-61.5831	-59.8706	-60.0218
1733	-61.5305	-63.0622	-63.3318	-55.4332	-58.518	-61.5404	-59.9429	-60.0579
1734	-61.5075	-63.1082	-63.3613	-55.443	-58.449	-61.4188	-59.8706	-60.0251
1735	-61.5732	-63.1674	-63.5224	-55.4989	-58.4391	-61.5272	-59.9232	-60.0349
1736	-61.6258	-63.0589	-63.5191	-55.4463	-58.2912	-61.5404	-59.9528	-59.9823
1737	-61.6653	-63.1773	-63.6605	-55.4693	-58.3734	-61.5272	-59.9232	-60.127
1738	-61.639	-63.1806	-63.6506	-55.4365	-58.3175	-61.5305	-59.7523	-60.081
1739	-61.6817	-63.2956	-63.644	-55.4266	-58.3241	-61.4648	-59.8706	-60.1401
1740	-61.8	-63.4074	-63.7262	-55.3642	-58.1663	-61.3826	-59.7983	-60.1335
1741	-61.8	-63.3876	-63.7624	-55.3083	-58.094	-61.3957	-59.7588	-60.0711
1742	-61.8559	-63.3745	-63.8971	-55.3576	-58.1893	-61.4746	-59.6898	-60.0152
1743	-61.823	-63.4895	-63.9267	-55.2064	-58.1466	-61.307	-59.726	-60.0908
1744	-61.8789	-63.6013	-64.0089	-55.1571	-58.002	-61.2807	-59.6799	-60.0086
1745	-61.8132	-63.5388	-63.9201	-55.1637	-57.8968	-61.215	-59.6011	-59.9856
1746	-61.8658	-63.6407	-63.9267	-55.0223	-57.739	-61.3925	-59.7095	-59.9429
1747	-61.9841	-63.7393	-63.999	-54.9171	-57.6897	-61.4582	-59.5879	-59.9626
1748	-61.9644	-63.7854	-64.068	-54.9106	-57.5418	-61.3234	-59.5682	-60.0218
1749	-62.0268	-63.838	-64.0713	-54.8087	-57.4202	-61.3629	-59.5452	-60.1434
1750	-62.0498	-63.7624	-64.1502	-54.6213	-57.361	-61.3596	-59.5386	-60.0382
1751	-62.1682	-63.8544	-64.2127	-54.4931	-57.4596	-61.3168	-59.5649	-59.9528
1752	-62.086	-63.8347	-64.2258	-54.4241	-57.4366	-61.4089	-59.5254	-59.9955
1753	-62.1485	-63.93	-64.1864	-54.2926	-57.3577	-61.1887	-59.5057	-59.9166
1754	-62.0794	-63.9892	-64.3014	-54.1118	-57.269	-61.1525	-59.4564	-59.9889
1755	-62.1879	-64.0352	-64.3343	-53.9804	-57.2788	-61.1854	-59.4827	-60.0284
1756	-62.178	-63.9859	-64.3211	-53.9541	-57.2657	-61.3201	-59.4959	-60.1204
1757	-62.1222	-64.0878	-64.3474	-53.8456	-57.1737	-61.2741	-59.4992	-59.9922
1758	-62.1353	-64.0779	-64.423	-53.6747	-57.315	-61.2577	-59.4926	-59.9922
1759	-62.0466	-64.1436	-64.4066	-53.6911	-57.223	-61.307	-59.4531	-59.9889
1760	-62.086	-64.239	-64.4921	-53.6977	-57.1967	-61.284	-59.4564	-60.1204
1761	-62.1254	-64.1765	-64.5282	-53.5366	-57.2262	-61.2906	-59.463	-60.1467
1762	-62.0959	-64.2324	-64.5414	-53.5662	-57.0586	-61.261	-59.4499	-60.0974
1763	-61.8789	-64.1535	-64.594	-53.5498	-57.1704	-61.2971	-59.3841	-60.1237
1764	-61.823	-64.2258	-64.6761	-53.4972	-57.1375	-61.1854	-59.4236	-60.0579
1765	-61.7639	-64.1929	-64.7715	-53.461	-57.1013	-61.2018	-59.2724	-60.1072
1766	-61.7705	-64.2127	-64.7616	-53.4084	-57.2295	-61.2084	-59.3348	-60.0481
1767	-61.7146	-64.216	-64.8142	-53.3953	-57.223	-61.1558	-59.2855	-60.1204
1768	-61.6718	-64.2028	-64.7747	-53.4742	-57.0553	-61.2051	-59.3217	-60.15
1769	-61.5667	-64.1502	-64.8208	-53.4019	-56.9699	-61.2445	-59.2658	-60.1072
1770	-61.5272	-64.0155	-64.8865	-53.3493	-56.7957	-61.261	-59.325	-60.104
1771	-61.4582	-64.0155	-64.9358	-53.3756	-56.7233	-61.2445	-59.1738	-60.0744
1772	-61.3201	-63.9234	-65.064	-53.3854	-56.9731	-61.2478	-59.1935	-60.1368
1773	-61.2347	-63.907	-65.0607	-53.3953	-56.9238	-61.3037	-59.1869	-60.1861
1774	-61.1459	-63.861	-65.1067	-53.4347	-56.9008	-61.2971	-59.1507	-60.1566
1775	-61.0342	-63.7985	-65.1034	-53.5465	-56.9501	-61.2774	-59.0817	-60.173
1776	-60.9684	-63.7328	-65.1527	-53.4676	-56.8219	-61.2807	-59.1244	-60.0974
1777	-60.8107	-63.6802	-65.2053	-53.5103	-56.7924	-61.307	-59.0258	-60.1697
1778	-60.8271	-63.6407	-65.1429	-53.6056	-56.8088	-61.2741	-59.0883	-60.2584
1779	-60.6792	-63.598	-65.1889	-53.5662	-56.8252	-61.3497	-59.0587	-60.196
1780	-60.6266	-63.5684	-65.179	-53.6451	-56.9041	-61.2807	-58.9831	-60.1303
1781	-60.5115	-63.5586	-65.1297	-53.6089	-56.845	-61.2643	-59.0291	-60.1401
1782	-60.4524	-63.4468	-65.2218	-53.8029	-56.8088	-61.238	-58.9207	-60.2223
1783	-60.4129	-63.4008	-65.2711	-53.6977	-56.8975	-61.2873	-58.9009	-60.2289
1784	-60.2124	-63.3022	-65.2251	-53.8292	-56.8022	-61.3596	-58.8319	-60.1861
1785	-60.1072	-63.3285	-65.2711	-53.9015	-56.8351	-61.2445	-58.8746	-60.2584
1786	-59.9988	-63.3186	-65.2546	-53.931	-56.7266	-61.3399	-58.9502	-60.1796
1787	-59.933	-63.2627	-65.3007	-54.1085	-56.7989	-61.3333	-58.8845	-60.2354
1788	-59.8048	-63.2726	-65.327	-54.1743	-57.0027	-61.3431	-58.8483	-60.2387
1789	-59.7358	-63.3186	-65.2941	-54.3288	-57.1737	-61.284	-58.6774	-60.3045
1790	-59.7062	-63.2956	-65.3039	-54.4109	-57.1769	-61.3168	-58.7201	-60.2913
1791	-59.6602	-63.3153	-65.3434	-54.4668	-57.2821	-61.4155	-58.5887	-60.2387
1792	-59.4959	-63.2463	-65.4847	-54.5523	-57.2131	-61.3004	-58.6117	-60.2617
1793	-59.578	-63.2956	-65.4749	-54.6279	-57.361	-61.3596	-58.7267	-60.3209
1794	-59.3907	-63.1904	-65.4749	-54.6838	-57.4629	-61.3563	-58.6281	-60.3308
1795	-59.2494	-63.2792	-65.4716	-54.7889	-57.5944	-61.3168	-58.6511	-60.3965
1796	-59.2461	-63.2956	-65.5472	-54.8876	-57.6568	-61.4188	-58.5427	-60.3899
1797	-59.1836	-63.1543	-65.5373	-55.0026	-57.7916	-61.4286	-58.5821	-60.3932
1798	-59.1606	-63.1641	-65.5472	-55.0683	-57.8179	-61.399	-58.6314	-60.4359
1799	-58.9272	-63.2857	-65.7313	-55.1669	-57.6766	-61.4089	-58.5591	-60.4162
1800	-58.97	-63.1937	-65.6787	-55.2195	-57.6601	-61.4286	-58.4506	-60.4951
1801	-58.9469	-63.2233	-65.843	-55.3313	-57.8376	-61.4483	-58.5624	-60.4327
1802	-58.9207	-63.151	-65.6787	-55.4595	-57.7949	-61.4812	-58.5788	-60.4688
1803	-58.8122	-63.1313	-65.8825	-55.5121	-57.8968	-61.4352	-58.5525	-60.5181
1804	-58.8451	-63.1839	-65.8496	-55.5778	-57.9428	-61.3826	-58.5361	-60.3834
1805	-58.9042	-63.2101	-66.0106	-55.6238	-57.8639	-61.3267	-58.5394	-60.4458
1806	-58.8286	-63.2956	-65.8266	-55.7948	-57.9724	-61.4352	-58.4802	-60.4327
1807	-58.799	-63.2167	-65.8233	-55.8178	-57.8245	-61.4976	-58.4506	-60.4096
1808	-58.7366	-63.2332	-65.9022	-55.8342	-57.9001	-61.445	-58.5065	-60.4096
1809	-58.7694	-63.2792	-65.8693	-55.9755	-57.9428	-61.4746	-58.4539	-60.4622
1810	-58.7629	-63.3252	-65.9153	-56.0051	-58.0217	-61.4188	-58.4342	-60.311
1811	-58.7694	-63.2923	-65.8956	-56.061	-58.0513	-61.4319	-58.421	-60.4359
1812	-58.638	-63.243	-65.8956	-56.1695	-57.9198	-61.5108	-58.5164	-60.3801
1813	-58.6314	-63.2266	-65.9285	-56.2286	-58.0118	-61.422	-58.4375	-60.4228
1814	-58.6643	-63.289	-65.8726	-56.2648	-57.9329	-61.4681	-58.4605	-60.5017
1815	-58.5854	-63.312	-65.7904	-56.3338	-57.9362	-61.3892	-58.5591	-60.3998
1816	-58.6413	-63.3613	-65.7773	-56.4028	-58.0118	-61.4713	-58.4638	-60.3965
1817	-58.5591	-63.3449	-65.7608	-56.4324	-58.0907	-61.4483	-58.4408	-60.3899
1818	-58.4671	-63.3153	-65.7115	-56.5738	-58.0283	-61.3694	-58.3684	-60.4096
1819	-58.4506	-63.312	-65.5965	-56.5968	-58.0907	-61.4483	-58.3947	-60.4327
1820	-58.5098	-63.4172	-65.4782	-56.6264	-58.1466	-61.4122	-58.4736	-60.3143
1821	-58.4539	-63.3613	-65.4354	-56.6658	-58.2123	-61.3596	-58.4145	-60.3899
1822	-58.3487	-63.2923	-65.3204	-56.8039	-58.2814	-61.4582	-58.4572	-60.2946
1823	-58.4243	-63.3778	-65.2908	-56.909	-58.3668	-61.376	-58.4572	-60.2519
1824	-58.4046	-63.2989	-65.2415	-56.8992	-58.4786	-61.5305	-58.4835	-60.311
1825	-58.3947	-63.2923	-65.0048	-56.9682	-58.5147	-61.399	-58.4901	-60.3406
1826	-58.3783	-63.3153	-65.0706	-57.126	-58.4095	-61.422	-58.3849	-60.3373
1827	-58.3126	-63.2759	-64.949	-57.103	-58.3076	-61.3925	-58.4671	-60.3472
1828	-58.3323	-63.2627	-64.8372	-57.1621	-58.2846	-61.5272	-58.4408	-60.2847
1829	-58.3816	-63.2562	-64.8208	-57.2246	-58.2616	-61.399	-58.4868	-60.4064
1830	-58.2961	-63.1904	-64.7353	-57.2837	-58.2715	-61.3793	-58.4901	-60.2979
1831	-58.2304	-63.1904	-64.6893	-57.4349	-58.1959	-61.4122	-58.5492	-60.2519
1832	-58.1679	-63.1839	-64.5578	-57.4382	-58.2781	-61.3826	-58.4671	-60.3406
1833	-58.2238	-63.2332	-64.5151	-57.4974	-58.2814	-61.4253	-58.4934	-60.2354
1834	-58.2633	-63.2693	-64.4395	-57.5434	-58.3537	-61.33	-58.4835	-60.3143
1835	-58.1909	-63.1641	-64.5479	-57.5927	-58.449	-61.2971	-58.4835	-60.3866
1836	-58.1384	-63.1641	-64.4592	-57.596	-58.5114	-61.2708	-58.4703	-60.2617
1837	-58.0891	-63.2003	-64.4	-57.7472	-58.4753	-61.238	-58.5262	-60.1927
1838	-58.1416	-63.1904	-64.3409	-57.8294	-58.5443	-61.3004	-58.4835	-60.2124
1839	-58.1614	-63.2562	-64.285	-57.9576	-58.564	-61.3793	-58.4671	-60.2683
1840	-58.2205	-63.1904	-64.308	-57.9214	-58.6002	-61.3103	-58.4769	-60.2387
1841	-58.2304	-63.1904	-64.3014	-57.9904	-58.7415	-61.3694	-58.5065	-60.173
1842	-58.2797	-63.2496	-64.2948	-58.1055	-58.7777	-61.3399	-58.4145	-60.2782
1843	-58.3389	-63.2332	-64.2784	-58.2797	-58.7974	-61.2774	-58.3652	-60.1171
1844	-58.2665	-63.2693	-64.3179	-58.306	-58.6955	-61.2182	-58.3586	-60.1993
1845	-58.306	-63.2233	-64.308	-58.3652	-58.7185	-61.3333	-58.569	-60.1434
1846	-58.3586	-63.2134	-64.2455	-58.3191	-58.6594	-61.3629	-58.4934	-60.0612
1847	-58.4079	-63.2069	-64.262	-58.3849	-58.7678	-61.284	-58.4112	-60.0251
1848	-58.3421	-63.1017	-64.1601	-58.5657	-58.9157	-61.3563	-58.5065	-60.104
1849	-58.4638	-63.1082	-64.1371	-58.5624	-58.9716	-61.2215	-58.4999	-60.1566
1850	-58.4934	-63.0228	-64.2094	-58.6676	-58.8796	-61.2774	-58.3684	-60.1664
1851	-58.5985	-62.9012	-64.2192	-58.7333	-58.9092	-61.3399	-58.4572	-60.0941
1852	-58.5722	-62.7763	-64.0812	-58.8615	-59.0275	-61.3563	-58.4046	-60.0678
1853	-58.5624	-62.7533	-64.0483	-58.9437	-58.965	-61.3399	-58.3093	-60.0711
1854	-58.615	-62.5265	-63.9826	-58.9798	-58.8829	-61.2971	-58.4046	-60.0678
1855	-58.7497	-62.4739	-63.9136	-59.039	-58.7843	-61.3136	-58.3487	-59.9199
1856	-58.7727	-62.2799	-63.8248	-59.1507	-58.5903	-61.2643	-58.3356	-59.9791
1857	-58.7464	-62.178	-63.6835	-59.2855	-58.4753	-61.2544	-58.329	-60.0612
1858	-58.8582	-62.0663	-63.5586	-59.2559	-58.2057	-61.2544	-58.3027	-60.0579
1859	-58.9437	-61.9545	-63.4008	-59.3808	-58.0545	-61.215	-58.3224	-60.0382
1860	-58.8681	-61.7573	-63.3482	-59.348	-57.9691	-61.2643	-58.306	-59.9955
1861	-58.8911	-61.5075	-63.1345	-59.5024	-57.9264	-61.238	-58.3257	-59.9035
1862	-58.9831	-61.4845	-63.0918	-59.5583	-57.8902	-61.1163	-58.3356	-60.0086
1863	-58.9732	-61.284	-62.9012	-59.5287	-57.808	-61.215	-58.3947	-59.91
1864	-59.0916	-61.1558	-62.842	-59.6997	-57.8113	-61.1591	-58.3191	-59.9593
1865	-59.1244	-61.1196	-62.7434	-59.6011	-57.7784	-61.1131	-58.3586	-59.9889
1866	-59.1442	-60.8567	-62.5988	-59.7917	-57.8442	-61.1591	-58.3257	-60.0251
1867	-59.2132	-60.8008	-62.4016	-59.8574	-57.7291	-61.1328	-58.2534	-60.0021
1868	-59.2592	-60.7186	-62.3555	-59.9363	-57.7883	-61.1985	-58.2797	-59.9528
1869	-59.2724	-60.4524	-62.1912	-59.9495	-57.8047	-61.1755	-58.3191	-59.9856
1870	-59.3052	-60.3768	-62.1254	-60.081	-57.9231	-61.1624	-58.2074	-59.8673
1871	-59.3808	-60.3603	-62.0531	-60.1204	-57.9296	-61.0802	-58.2698	-59.9725
1872	-59.3808	-60.3045	-62.0203	-60.15	-57.9855	-61.2084	-58.1942	-59.8048
1873	-59.5024	-60.1796	-61.8165	-60.2354	-57.9034	-61.2018	-58.1909	-59.7457
1874	-59.6175	-60.1237	-61.8	-60.2486	-57.9329	-61.1624	-58.1121	-59.8607
1875	-59.5386	-60.0349	-61.7014	-60.3045	-57.8902	-61.1131	-58.2337	-59.772
1876	-59.6142	-59.864	-61.5864	-60.4392	-58.0381	-61.1985	-58.1778	-59.8969
1877	-59.6997	-59.9363	-61.616	-60.3834	-57.9198	-61.1065	-58.2074	-59.8147
1878	-59.7292	-59.9298	-61.5404	-60.5543	-57.9658	-61.2018	-58.1679	-59.7391
1879	-59.8016	-59.8706	-61.4746	-60.5313	-58.1039	-61.0835	-58.1811	-59.6997
1880	-59.7818	-59.7851	-61.4023	-60.666	-58.1269	-61.1196	-58.1219	-59.7555
1881	-59.9265	-59.7325	-61.4286	-60.6956	-58.1597	-61.0473	-58.1614	-59.8081
1882	-60.0021	-59.6701	-61.5174	-60.6529	-58.3339	-61.0999	-58.1088	-59.6602
1883	-60.1204	-59.6274	-61.3596	-60.7252	-58.4325	-61.0539	-58.1548	-59.7161
1884	-60.1763	-59.5912	-61.4122	-60.7153	-58.5739	-61.0539	-58.0989	-59.6997
1885	-60.1796	-59.4794	-61.3859	-60.8402	-58.3767	-61.0309	-58.1384	-59.6471
1886	-60.2157	-59.4959	-61.261	-60.8501	-58.449	-60.998	-58.2041	-59.6865
1887	-60.2256	-59.4663	-61.3892	-60.8928	-58.3142	-61.1328	-58.1153	-59.7161
1888	-60.311	-59.3973	-61.3004	-60.9356	-58.3569	-61.1525	-58.1877	-59.7523
1889	-60.3669	-59.3512	-61.353	-61.0046	-58.38	-61.1098	-58.0825	-59.7062
1890	-60.3308	-59.3644	-61.3596	-61.0605	-58.3931	-61.0868	-58.0003	-59.6964
1891	-60.4129	-59.2461	-61.2445	-61.0539	-58.2025	-61.0276	-58.043	-59.6405
1892	-60.3176	-59.1474	-61.261	-61.0736	-58.3734	-61.0999	-58.0069	-59.7095
1893	-60.4885	-59.062	-61.3333	-61.1722	-58.3569	-61.1163	-58.0167	-59.6997
1894	-60.5411	-59.1212	-61.376	-61.0835	-58.5377	-61.0605	-57.9181	-59.6931
1895	-60.5576	-59.0653	-61.376	-61.2051	-58.4983	-61.0933	-57.9116	-59.7555
1896	-60.6595	-59.1179	-61.3859	-61.1788	-58.403	-61.0868	-57.9674	-59.703
1897	-60.4787	-59.0718	-61.3168	-61.2412	-58.4095	-61.1328	-57.9707	-59.6931
1898	-60.5608	-58.8812	-61.3267	-61.1558	-58.5081	-61.0769	-57.9148	-59.7523
1899	-60.4852	-58.9502	-61.3431	-61.1328	-58.4917	-61.067	-57.9937	-59.6701
1900	-60.5214	-58.993	-61.3399	-61.1887	-58.6462	-60.9816	-57.8458	-59.7818
1901	-60.5576	-58.9502	-61.3333	-61.1394	-58.6856	-61.0473	-57.8853	-59.6405
1902	-60.666	-58.8976	-61.3662	-61.2971	-58.7612	-61.1032	-57.8327	-59.7095
1903	-60.6792	-58.8976	-61.3366	-61.3037	-58.8401	-61.1032	-57.8984	-59.7358
1904	-60.7022	-58.9108	-61.3662	-61.3103	-58.8303	-61.0506	-57.8195	-59.7588
1905	-60.6726	-58.8418	-61.3497	-61.3563	-58.8007	-61.1394	-57.9116	-59.726
1906	-60.6858	-58.9305	-61.3333	-61.4779	-58.8105	-61.0375	-57.8622	-59.6504
1907	-60.8008	-59.0817	-61.3136	-61.3563	-58.758	-61.1196	-57.8162	-59.726
1908	-60.8468	-59.0784	-61.399	-61.5174	-58.8861	-60.9849	-57.905	-59.7555
1909	-60.8863	-59.1803	-61.4089	-61.4582	-58.7941	-61.044	-57.836	-59.6109
1910	-60.9158	-59.1474	-61.5765	-61.3892	-58.7185	-61.0769	-57.7998	-59.7095
1911	-60.8665	-59.2592	-61.6357	-61.4319	-58.6298	-61.1229	-57.7867	-59.6635
1912	-60.9191	-59.2099	-61.6554	-61.4319	-58.5443	-61.0539	-57.8064	-59.6602
1913	-60.9126	-59.2559	-61.6784	-61.4253	-58.4588	-61.1328	-57.8162	-59.7424
1914	-61.0276	-59.3348	-61.777	-61.5206	-58.3832	-61.0769	-57.8491	-59.7128
1915	-60.9191	-59.371	-61.731	-61.5535	-58.209	-61.0933	-57.8392	-59.6701
1916	-60.9783	-59.4301	-61.7343	-61.5371	-58.1203	-61.0999	-57.7998	-59.6274
1917	-61.0835	-59.5682	-61.7442	-61.5272	-58.1269	-61.1558	-57.7143	-59.6306
1918	-61.0144	-59.6931	-61.731	-61.4023	-58.0414	-61.0506	-57.6486	-59.6471
1919	-60.9684	-59.6997	-61.7146	-61.4056	-57.8738	-61.09	-57.7209	-59.6011
1920	-60.9914	-59.749	-61.7376	-61.3267	-58.0315	-61.0769	-57.6946	-59.7194
1921	-61.0079	-59.7424	-61.7803	-61.4812	-57.9264	-61.1624	-57.6815	-59.6767
1922	-61.0605	-59.8541	-61.7869	-61.5174	-57.8869	-61.1788	-57.665	-59.6405
1923	-61.1262	-60.0021	-61.7014	-61.4976	-57.808	-61.0999	-57.6486	-59.6865
1924	-61.0605	-59.9955	-61.7409	-61.4976	-57.762	-61.0999	-57.5467	-59.5912
1925	-61.1788	-60.15	-61.6258	-61.5305	-57.7982	-61.1163	-57.6223	-59.6208
1926	-61.2018	-60.127	-61.5897	-61.5141	-57.8277	-61.1689	-57.6387	-59.6043
1927	-61.2971	-60.1796	-61.593	-61.6554	-57.8212	-61.067	-57.6979	-59.6306
1928	-61.3201	-60.2354	-61.5601	-61.6751	-57.7784	-61.1163	-57.7702	-59.6964
1929	-61.3103	-60.1894	-61.3629	-61.6686	-57.7489	-61.0736	-57.7538	-59.6471
1930	-61.4483	-60.3143	-61.2544	-61.6127	-57.7456	-61.1131	-57.7669	-59.7095
1931	-61.3727	-60.3242	-61.2478	-61.6357	-57.8047	-61.1065	-57.7078	-59.6931
1932	-61.4122	-60.3275	-61.2807	-61.5174	-57.7291	-61.1689	-57.6552	-59.6504
1933	-61.4385	-60.3702	-61.1657	-61.5404	-57.8179	-61.1722	-57.5993	-59.7095
1934	-61.3037	-60.4524	-61.0966	-61.5699	-57.9132	-61.1196	-57.6354	-59.6536
1935	-61.3662	-60.5181	-61.0276	-61.5075	-57.8343	-61.0999	-57.6815	-59.8048
1936	-61.3727	-60.5444	-60.9126	-61.4845	-57.9034	-61.1426	-57.6848	-59.6504
1937	-61.3431	-60.689	-60.8271	-61.4319	-57.7456	-61.1525	-57.6815	-59.6372
1938	-61.5042	-60.7318	-60.8304	-61.4516	-57.67	-61.2215	-57.619	-59.7062
1939	-61.4483	-60.666	-60.7679	-61.4549	-57.7061	-61.1689	-57.6256	-59.6208
1940	-61.4845	-60.7515	-60.6266	-61.4845	-57.6108	-61.1492	-57.6617	-59.7062
1941	-61.5174	-60.8402	-60.6036	-61.3727	-57.67	-61.2281	-57.6749	-59.5879
1942	-61.5732	-60.8698	-60.5247	-61.4188	-57.7489	-61.2445	-57.7045	-59.6175
1943	-61.5206	-61.0013	-60.3932	-61.3859	-57.6338	-61.1821	-57.7538	-59.5649
1944	-61.6225	-60.9553	-60.3571	-61.3136	-57.6042	-61.261	-57.688	-59.578
1945	-61.7409	-60.9388	-60.265	-61.3892	-57.5286	-61.2445	-57.6979	-59.6832
1946	-61.7014	-61.1131	-60.2091	-61.3431	-57.5254	-61.2248	-57.6782	-59.5945
1947	-61.5601	-61.0572	-60.1007	-61.3596	-57.4333	-61.2051	-57.7078	-59.6668
1948	-61.5864	-61.1525	-60.127	-61.4122	-57.5122	-61.2708	-57.6782	-59.6504
1949	-61.7705	-61.1591	-60.0645	-61.4253	-57.4728	-61.2347	-57.7406	-59.6602
1950	-61.8329	-61.2873	-60.0941	-61.376	-57.4136	-61.2215	-57.7867	-59.6504
1951	-61.7705	-61.2873	-60.0415	-61.3793	-57.4826	-61.2544	-57.7834	-59.7194
1952	-61.6455	-61.3826	-60.0777	-61.4779	-57.4826	-61.33	-57.7308	-59.6931
1953	-61.7343	-61.3497	-60.0349	-61.4746	-57.4596	-61.2511	-57.7998	-59.6997
1954	-61.8066	-61.4615	-60.127	-61.5239	-57.3018	-61.3136	-57.688	-59.7292
1955	-61.8198	-61.4615	-60.0842	-61.5239	-57.2394	-61.2708	-57.7439	-59.703
1956	-61.8428	-61.4615	-59.9955	-61.5371	-57.2427	-61.3136	-57.6913	-59.7194
1957	-61.846	-61.5272	-59.9659	-61.5732	-57.2262	-61.3925	-57.6617	-59.8147
1958	-61.9644	-61.5437	-60.0579	-61.5831	-57.1638	-61.2906	-57.6683	-59.7161
1959	-62.0071	-61.5305	-59.8607	-61.7014	-57.2887	-61.2511	-57.7209	-59.7292
1960	-61.9282	-61.5305	-59.8607	-61.5601	-57.1276	-61.2906	-57.7669	-59.6931
1961	-62.0104	-61.5239	-59.772	-61.5798	-57.1013	-61.2774	-57.7078	-59.6767
1962	-62.0203	-61.4976	-59.795	-61.639	-57.1441	-61.2708	-57.7735	-59.772
1963	-62.0991	-61.5699	-59.7753	-61.6883	-57.3281	-61.1624	-57.7472	-59.7851
1964	-62.0235	-61.6587	-59.7983	-61.593	-57.384	-61.1755	-57.7768	-59.7325
1965	-62.017	-61.6423	-59.7523	-61.6653	-57.2953	-61.2051	-57.7735	-59.749
1966	-62.017	-61.5404	-59.6931	-61.7277	-57.4859	-61.3168	-57.7308	-59.7687
1967	-62.04	-61.4779	-59.6274	-61.7672	-57.67	-61.2938	-57.665	-59.726
1968	-62.1189	-61.307	-59.5978	-61.754	-57.5747	-61.1426	-57.711	-59.7588
1969	-62.1222	-61.2938	-59.6208	-61.731	-57.6963	-61.2215	-57.6617	-59.7128
1970	-62.1254	-61.2084	-59.6964	-61.8	-57.7291	-61.3793	-57.6289	-59.7884
1971	-62.0893	-61.0276	-59.6438	-61.8888	-57.67	-61.3037	-57.7439	-59.6997
1972	-62.109	-60.7679	-59.5813	-61.9217	-57.8245	-61.3431	-57.7209	-59.7884
1973	-62.1353	-60.6989	-59.5945	-61.8493	-57.8475	-61.3004	-57.7341	-59.8936
1974	-62.1123	-60.6134	-59.6536	-61.9447	-57.8968	-61.2478	-57.6946	-59.8081
1975	-62.1353	-60.5444	-59.5813	-61.9578	-57.9527	-61.3563	-57.7604	-59.8377
1976	-61.9874	-60.2847	-59.5386	-61.8723	-58.071	-61.3596	-57.7801	-59.8344
1977	-62.1583	-60.2782	-59.6175	-61.9775	-58.1959	-61.3037	-57.7636	-59.8114
1978	-62.2076	-60.0021	-59.6536	-61.9874	-58.209	-61.33	-57.8064	-59.9298
1979	-62.155	-59.8837	-59.6602	-62.0893	-58.232	-61.2708	-57.836	-59.864
1980	-62.178	-59.8213	-59.5616	-62.109	-58.3832	-61.2018	-57.7998	-59.8804
1981	-62.2997	-59.6274	-59.5287	-62.1485	-58.3832	-61.2971	-57.7932	-59.933
1982	-62.3851	-59.4992	-59.5846	-62.1057	-58.4161	-61.3333	-57.8195	-59.8311
1983	-62.3851	-59.3381	-59.6274	-62.1583	-58.5114	-61.3103	-57.8064	-59.9067
1984	-62.3194	-59.2625	-59.6799	-62.1879	-58.6035	-61.3103	-57.8195	-59.8541
1985	-62.3621	-58.993	-59.726	-62.1616	-58.5969	-61.3596	-57.8721	-59.8377
1986	-62.4147	-58.97	-59.5978	-62.1945	-58.6199	-61.4089	-57.8097	-59.9495
1987	-62.3917	-58.8878	-59.6865	-62.1024	-58.6626	-61.3694	-57.8655	-59.9363
1988	-62.3687	-58.8056	-59.703	-62.0827	-58.5739	-61.3662	-57.8688	-59.9429
1989	-62.4739	-58.7169	-59.6734	-61.7967	-58.3504	-61.2873	-57.8557	-59.8377
1990	-62.4574	-58.5591	-59.7095	-61.8132	-58.2583	-61.353	-57.8853	-59.9462
1991	-62.5199	-58.4342	-59.6767	-61.8395	-58.1302	-61.33	-57.8984	-59.8936
1992	-62.464	-58.3454	-59.532	-61.9282	-58.0085	-61.284	-57.9674	-59.9823
1993	-62.5396	-58.237	-59.749	-61.7737	-58.0447	-61.2347	-57.9148	-59.8279
1994	-62.6152	-57.9872	-59.7457	-61.7902	-57.9658	-61.2741	-57.9247	-59.8574
1995	-62.5067	-57.8064	-59.7292	-61.7672	-57.9625	-61.2807	-57.9641	-59.9528
1996	-62.6053	-57.8294	-59.8213	-61.7047	-58.0414	-61.3234	-57.9181	-59.8903
1997	-62.5758	-57.7045	-59.7983	-61.6718	-58.0217	-61.238	-57.9806	-59.8246
[truncated: 13,004 more rows]
