# Supplementary material for: Hierarchical architecture of dopaminergic circuits enables second-order conditioning in Drosophila
Source: eLife. 2023 Jan 24;12:e79042. doi: 10.7554/eLife.79042 (PMC9937650; doi:10.7554/eLife.79042)
Supplement: Figure 6—figure supplement 1—source data 1. [file elife-79042-fig6-figsupp1-data1.xlsx]

## Sheet: Figure 6-figure supplement 1C
	ɑ1	β1	β2	β′2	γ5	γ4	γ3	β'1	γ2	γ1	ɑ2/ɑ'2	ɑ3	ɑ'3
MB043C	3.5421	1.28091	0.11257	0.136537	0.1301	0.137123	0.176153	0.244007	0.177157	0.137453	0.0240414	0.074258	0.0379359
MB213B	0.0977476	1.55632	4.0539	0.391814	0.141094	0.106436	0.118843	0.114803	0.108121	0.00112668	0.00922115	-0.0190877	-0.0223856
MB032B	0.0479421	0.052409	0.52371	0.506995	0.499038	0.224672	0.257418	-0.000172588	0.146467	0.0886232	0.0102939	0.0919071	-0.0257265
MB109B	0.0787905	0.10498	0.275687	1.46809	1.0042	0.12057	0.134531	0.0706676	0.106469	0.0913506	0.0840615	-0.00846143	0.0313652
MB315C	0.0767628	0.0887916	0.298421	0.405416	3.60598	0.203771	0.168814	0.0646958	0.200101	0.0769247	0.124907	0.0749859	-0.00366841
MB312C	0.0773748	0.0544841	0.0620968	-0.0372251	0.0778871	1.79962	0.177072	-0.158218	0.144472	0.111135	-0.0144099	-0.0597613	-0.113986
SS33917	0.359794	0.361961	0.272631	0.848218	0.42795	0.681777	0.180024	0.0766523	0.111494	0.184294	0.125158	0.261079	0.0592425
SS67221	7.55522e-05	0.557828	0.715695	2.26408	1.02636	2.1545	0.252846	0.259481	-0.209746	0.157064	-0.0180145	0.220844	0.0891717
