# Supplementary material for: Hierarchical architecture of dopaminergic circuits enables second-order conditioning in Drosophila
Source: eLife. 2023 Jan 24;12:e79042. doi: 10.7554/eLife.79042 (PMC9937650; doi:10.7554/eLife.79042)
Supplement: Figure 7—figure supplement 1—source data 1. [file elife-79042-fig7-figsupp1-data1.xlsx]

## Sheet: Figure7-figure supplement1
	upwind displacement																									cos(upwind angle)
Time	SS67221												Empty split													SS67221												Empty split
0.333333	-2.54e-05	2.37e-05	-2.54e-05	3.68e-05	-3.08e-05	-5.89e-06	6.59e-06	-2.02e-07	-1.95e-05	2.08e-07	-2.76e-05	-4.12e-06	2.72e-05	-3.71e-06	2.69e-05	-1.72e-05	1.16e-05	-2.98e-06	4.2e-05	1.51e-05	1.31e-05	1.55e-05			-0.181359	-0.06019	-0.137733	-0.067188	-0.051044	-0.067586	0.022949	-0.075391	-0.010079	-0.057846	0.036621	-0.006291	-0.227062	-0.172851	-0.153988	-0.161731	-0.121321	-0.142102	-0.084951	-0.109718	-0.077194	-0.075098
0.666667	-2.70615e-05	2.38976e-05	-2.52173e-05	4.03318e-05	-3.01285e-05	8.67453e-06	8.02484e-06	2.41048e-07	-1.72918e-05	9.43894e-07	-2.70942e-05	-5.68311e-06	3.20648e-05	-5.46155e-06	2.72212e-05	-1.78382e-05	1.3026e-05	-2.45718e-06	3.93613e-05	1.87016e-05	1.17844e-05	1.64711e-05			-0.148094	-0.0949478	-0.120175	-0.068463	-0.0648023	-0.0702169	0.0410364	-0.104801	-0.0223068	-0.0497468	0.000287602	-0.0525605	-0.211771	-0.106467	-0.180575	-0.150985	-0.0931462	-0.209153	-0.0985783	-0.119435	-0.121004	-0.0718217
1	-0.05	0.046	-0.04	0.066	-0.05	0.01	0.015	0.004	-0.02	0.002	-0.04	-0.01	0.043	-0.01	0.036	-0.02	0.018	0	0.051	0.022	0.013	0.017			-0.14	-0.1	-0.12	-0.06	-0.05	-0.1	-0.02	-0.13	-0.06	0	-0.01	-0.07	-0.23	-0.1	-0.18	-0.16	-0.12	-0.21	-0.1	-0.11	-0.17	-0.08
1.333	-0.05	0.041	-0.04	0.055	-0.06	-0.01	0.019	0.008	-0.02	0	-0.03	-0.01	0.04	-0.01	0.038	-0.02	0.015	0	0.046	0.023	0.009	0.014			-0.15	-0.12	-0.1	-0.07	-0.09	-0.04	0.016	-0.15	-0.09	0.005	0.024	-0.04	-0.24	-0.12	-0.19	-0.14	-0.12	-0.18	-0.08	-0.1	-0.19	-0.08
1.667	-0.05	0.036	-0.03	0.058	-0.06	0	0.024	0.006	-0.02	-0.01	-0.03	-0.01	0.04	-0.01	0.034	-0.02	0.013	0.001	0.042	0.021	0.008	0.013			-0.18	-0.13	-0.09	-0.09	-0.09	-0.04	0.04	-0.12	-0.12	0.009	-0.01	-0.03	-0.22	-0.14	-0.14	-0.15	-0.13	-0.19	-0.07	-0.13	-0.14	-0.05
2	-0.05	0.033	-0.03	0.05	-0.06	-0.01	0.02	0.004	-0.02	-0.02	-0.03	-0.01	0.037	-0.01	0.035	-0.02	0.011	0.003	0.04	0.025	0.006	0.012			-0.15	-0.13	-0.12	-0.14	-0.08	0	0.037	-0.12	-0.1	0.023	0.01	-0.01	-0.22	-0.14	-0.13	-0.18	-0.19	-0.19	-0.05	-0.13	-0.13	-0.03
2.333	-0.05	0.033	-0.03	0.043	-0.05	-0.02	0.015	0.0003	-0.02	-0.02	-0.03	-0.01	0.033	-0.01	0.036	-0.01	0.011	0.002	0.041	0.025	0.004	0.013			-0.19	-0.13	-0.11	-0.13	-0.07	0.042	0.036	-0.16	-0.02	0.063	0.082	-0.02	-0.22	-0.17	-0.14	-0.17	-0.19	-0.17	-0.06	-0.13	-0.12	-0.07
2.667	-0.05	0.035	-0.03	0.048	-0.06	-0.01	0.005	0.002	-0.02	-0.01	-0.03	-0.02	0.031	0	0.038	-0.01	0.008	0.002	0.039	0.022	0.001	0.015			-0.2	-0.14	-0.19	-0.13	-0.04	0.005	0.027	-0.13	-0.06	0.04	0.065	0.025	-0.24	-0.13	-0.07	-0.19	-0.17	-0.12	-0.09	-0.14	-0.12	-0.09
3	-0.05	0.039	-0.02	0.052	-0.06	0.003	0	0.0003	-0.01	-0.01	-0.02	-0.02	0.036	0	0.044	-0.01	0.008	0.003	0.039	0.021	0	0.014			-0.2	-0.17	-0.19	-0.13	-0.05	0	0.097	-0.15	-0.06	-0.01	0.035	0.05	-0.25	-0.13	-0.06	-0.24	-0.21	-0.11	-0.08	-0.13	-0.16	-0.08
3.333	-0.05	0.048	-0.02	0.049	-0.06	0.007	-0.02	0	-0.01	0	-0.01	-0.02	0.039	0	0.043	-0.01	0.011	0.005	0.04	0.021	0	0.01			-0.18	-0.18	-0.16	-0.12	-0.06	0.006	0.015	-0.14	-0.06	0	0.077	0.075	-0.24	-0.15	-0.11	-0.18	-0.22	-0.16	-0.04	-0.12	-0.2	-0.08
3.667	-0.05	0.054	-0.01	0.055	-0.06	0.004	-0.03	0.003	-0.01	0	-0.01	-0.02	0.037	0.001	0.031	-0.01	0.01	0.005	0.037	0.02	0	0.011			-0.17	-0.09	-0.14	-0.17	-0.12	0.006	-0.05	-0.09	-0.06	0.039	0.012	0.04	-0.22	-0.13	-0.14	-0.17	-0.21	-0.14	-0.08	-0.13	-0.18	-0.08
4	-0.04	0.055	-0.02	0.051	-0.07	0.0008	-0.03	0.004	-0.01	0	0	-0.02	0.039	0.003	0.025	-0.01	0.01	0.007	0.032	0.02	0	0.01			-0.17	-0.05	-0.18	-0.22	-0.11	-0.03	-0.06	-0.11	-0.04	0.007	-0.06	-0.01	-0.21	-0.12	-0.13	-0.2	-0.22	-0.13	-0.08	-0.13	-0.27	-0.11
4.333	-0.04	0.052	-0.02	0.046	-0.07	-0.01	-0.02	0.002	0	0	-0.01	-0.02	0.04	0.006	0.023	-0.01	0.007	0.008	0.03	0.009	-0.01	0.009			-0.2	-0.13	-0.22	-0.2	-0.11	-0.01	-0.15	-0.07	-0.07	0.013	0.043	-0.09	-0.2	-0.12	-0.11	-0.21	-0.2	-0.1	-0.08	-0.12	-0.26	-0.1
4.667	-0.04	0.043	-0.02	0.046	-0.07	-0.03	-0.02	0	0	0	-0.01	-0.04	0.043	0.008	0.025	-0.01	0.005	0.007	0.033	0.007	-0.01	0.009			-0.19	-0.09	-0.18	-0.2	-0.11	-0.03	-0.15	-0.05	-0.1	-0.04	0.063	-0.11	-0.21	-0.13	-0.12	-0.17	-0.21	-0.14	-0.05	-0.1	-0.25	-0.13
5	-0.05	0.035	-0.02	0.038	-0.06	-0.04	-0.01	-0.01	-0.01	0	-0.01	-0.05	0.042	0.011	0.023	-0.01	0.009	0.004	0.031	0.003	-0.02	0.009			-0.16	-0.13	-0.16	-0.18	-0.08	-0.06	-0.12	-0.03	-0.08	-0.06	0.043	-0.09	-0.17	-0.18	-0.12	-0.12	-0.21	-0.17	-0.06	-0.11	-0.22	-0.12
5.333	-0.05	0.028	-0.01	0.034	-0.06	-0.04	-0.01	-0.01	-0.01	0.003	-0.01	-0.06	0.034	0.013	0.025	-0.01	0.008	0.007	0.028	0.0009	-0.02	0.008			-0.11	-0.12	-0.15	-0.14	-0.09	-0.06	-0.07	-0.07	-0.09	-0.02	0.019	-0.07	-0.17	-0.17	-0.12	-0.11	-0.22	-0.18	-0.04	-0.12	-0.19	-0.12
5.667	-0.06	0.022	-0.01	0.044	-0.05	-0.04	0	-0.01	-0.01	0.007	-0.01	-0.07	0.029	0.015	0.024	-0.01	0.006	0.01	0.025	0.005	-0.02	0.009			-0.04	-0.15	-0.09	-0.14	-0.16	-0.05	0.045	-0.01	-0.1	-0.02	-0.05	-0.06	-0.18	-0.17	-0.09	-0.16	-0.21	-0.18	-0.06	-0.09	-0.22	-0.1
6	-0.06	0.018	-0.02	0.037	-0.05	-0.03	-0.01	-0.01	0	0.006	-0.02	-0.07	0.028	0.019	0.022	-0.01	0.005	0.009	0.022	0.009	-0.01	0.011			-0.03	-0.15	-0.07	-0.17	-0.19	-0.06	0.112	0.041	-0.1	0.036	0.003	0.004	-0.16	-0.17	-0.15	-0.16	-0.19	-0.18	-0.05	-0.1	-0.25	-0.09
6.333	-0.06	0.014	-0.02	0.023	-0.05	-0.02	-0.01	-0.01	0.002	0.005	-0.02	-0.05	0.028	0.022	0.019	-0.01	0.0005	0.008	0.025	0.009	-0.01	0.015			-0.1	-0.16	-0.09	-0.17	-0.14	-0.08	0.123	0.016	-0.09	0.071	-0.07	0.08	-0.2	-0.18	-0.15	-0.09	-0.2	-0.22	-0.06	-0.07	-0.27	-0.11
6.667	-0.06	0.01	-0.02	0.004	-0.04	-0.02	-0.01	-0.01	0.002	0.005	-0.03	-0.03	0.032	0.019	0.008	-0.01	0	0.011	0.022	0.004	-0.01	0.018			-0.12	-0.18	-0.09	-0.19	-0.16	-0.04	0.099	0.035	-0.05	0.074	-0.05	0.059	-0.22	-0.23	-0.22	-0.11	-0.19	-0.18	-0.09	-0.1	-0.28	-0.13
7	-0.06	0.009	-0.02	0.008	-0.04	-0.02	0	-0.01	0.003	0	-0.03	-0.02	0.036	0.017	0.013	-0.01	-0.01	0.012	0.021	0.0006	0	0.018			-0.21	-0.19	-0.09	-0.19	-0.14	-0.08	0.094	0.047	-0.04	0.051	-0.03	-0.01	-0.21	-0.18	-0.2	-0.13	-0.19	-0.2	-0.1	-0.12	-0.29	-0.12
7.333	-0.06	0.006	-0.01	0	-0.03	-0.01	0	-0.01	0.004	0.001	-0.03	-0.01	0.033	0.018	-0.01	-0.01	-0.02	0.012	0.019	0	-0.01	0.018			-0.27	-0.16	-0.12	-0.16	-0.08	-0.1	0.069	0	-0.04	0.083	-0.02	-0.05	-0.21	-0.13	-0.18	-0.19	-0.24	-0.2	-0.13	-0.1	-0.28	-0.14
7.667	-0.06	0.003	0.0006	-0.02	-0.02	-0.01	0	-0.01	0.003	0.002	-0.03	-0.02	0.026	0.019	-0.02	-0.01	-0.01	0.009	0.019	0.002	0	0.018			-0.26	-0.18	-0.12	-0.14	-0.08	-0.1	0.078	0	-0.02	0.11	0.097	-0.01	-0.23	-0.17	-0.14	-0.17	-0.22	-0.21	-0.12	-0.12	-0.26	-0.16
8	-0.06	0.005	0.002	-0.01	-0.01	-0.02	0	-0.01	0.003	0.001	-0.02	-0.01	0.022	0.012	-0.01	-0.01	-0.01	0.01	0.017	0.003	0	0.018			-0.17	-0.16	-0.09	-0.15	-0.13	-0.12	0.087	-0.02	-0.08	0.096	0.075	-0.02	-0.2	-0.19	-0.15	-0.15	-0.18	-0.22	-0.13	-0.14	-0.23	-0.11
8.333	-0.05	0.004	0.005	-0.01	-0.02	-0.02	0	-0.01	0	0	-0.01	-0.02	0.017	0.011	0	0	-0.01	0.011	0.018	0.002	0.001	0.015			-0.22	-0.19	-0.1	-0.16	-0.16	-0.15	0.085	-0.03	-0.11	0.153	-0.03	0.03	-0.23	-0.2	-0.16	-0.17	-0.17	-0.22	-0.16	-0.13	-0.23	-0.14
8.667	-0.03	0.005	0	-0.02	-0.01	-0.03	-0.01	-0.01	-0.01	-0.01	-0.01	-0.02	0.01	0.011	0	0	-0.01	0.011	0.019	0	0.002	0.014			-0.24	-0.17	-0.11	-0.17	-0.16	-0.14	0.149	0.023	-0.06	0.154	0.022	0.013	-0.23	-0.21	-0.16	-0.16	-0.13	-0.23	-0.19	-0.12	-0.25	-0.17
9	-0.02	0.007	0.004	-0.02	-0.01	-0.03	-0.01	-0.01	-0.01	-0.01	0	-0.01	0.007	0.007	0	0	-0.01	0.012	0.018	0	0.003	0.013			-0.19	-0.19	-0.08	-0.17	-0.12	-0.13	0.073	0.022	-0.05	0.138	0.006	-0.02	-0.24	-0.22	-0.16	-0.16	-0.15	-0.2	-0.17	-0.11	-0.29	-0.12
9.333	-0.01	0.006	0.004	-0.02	0	-0.03	-0.02	-0.01	-0.01	-0.01	0.002	0	0.008	0.004	0	0	0.0008	0.011	0.016	0	0.001	0.009			-0.15	-0.21	-0.05	-0.16	-0.15	-0.09	-0.01	-0.04	-0.09	0.14	-0.09	0.007	-0.28	-0.22	-0.19	-0.18	-0.13	-0.22	-0.17	-0.07	-0.24	-0.11
9.667	-0.01	0.0002	0	-0.02	0.002	-0.02	-0.02	-0.01	-0.01	-0.01	0.004	0	0.007	0.007	0	0.002	0.006	0.009	0.014	0.0001	0.003	0.006			-0.06	-0.17	0.028	-0.05	-0.12	0.071	0.012	0.004	0.009	0.124	-0.13	0.01	-0.26	-0.16	-0.11	-0.21	-0.12	-0.15	-0.17	-0.12	-0.22	-0.11
10	0	0	0	-0.02	0.0005	-0.02	-0.01	-0.01	-0.01	-0.01	0	0	-0.01	0.004	0.002	0.003	0.002	0.005	0.01	0.001	0.004	0.003			0.133	-0.05	0.272	0.25	-0.04	0.319	0.094	0.023	0.236	0.259	0.026	0.1	-0.22	-0.06	-0.03	-0.18	-0.05	0.005	-0.09	-0.1	-0.16	0.022
10.33	0	0	0	0	0	0	0	0	0	0	0	0	0	0	0	0	0	0	0	0	0	0			0.213	0.195	0.311	0.328	0.224	0.352	0.229	0.171	0.256	0.261	0.219	0.287	-0.08	-0.03	0.049	-0.11	0.03	0.074	0.067	-0.09	-0.07	0.091
10.67	0.013	0.016	0.012	0.012	0.009	0.026	0.015	0.019	0.01	0.006	0.012	0.015	0.0007	0	0.002	0.004	0.0001	0	0	0	0	0.004			0.214	0.251	0.32	0.398	0.282	0.381	0.182	0.246	0.293	0.282	0.167	0.342	0.083	-0.06	0.105	-0.04	0.059	0.059	0.104	-0.03	-0.02	0.147
11	0.031	0.038	0.026	0.02	0.016	0.045	0.02	0.044	0.017	0.019	0.022	0.023	0.005	-0.01	0.008	0.007	0	0.003	0.004	0	0.003	0.013			0.228	0.337	0.265	0.355	0.299	0.384	0.113	0.284	0.318	0.244	0.167	0.389	0.135	-0.09	0.071	-0.03	-0.01	0.037	0.101	-0.02	0.019	0.13
11.33	0.051	0.067	0.042	0.016	0.024	0.055	0.051	0.063	0.025	0.031	0.031	0.024	0.007	-0.01	0.009	0.008	0	0.007	0.013	0	0.008	0.019			0.222	0.341	0.324	0.34	0.34	0.285	0.075	0.312	0.303	0.248	0.196	0.337	0.129	-0.1	0.046	0.017	0.028	0.019	0.131	-0.03	0.109	0.061
11.67	0.066	0.091	0.059	0.016	0.034	0.063	0.082	0.071	0.028	0.04	0.041	0.023	0.012	0	0.013	0.008	0	0.008	0.014	0.005	0.003	0.023			0.228	0.342	0.303	0.378	0.345	0.197	0.09	0.289	0.292	0.28	0.169	0.344	0.085	-0.07	0.02	0.028	0.042	-0.02	0.138	-0.03	0.059	0.053
12	0.083	0.107	0.073	0.016	0.045	0.073	0.103	0.078	0.031	0.053	0.045	0.02	0.016	0.0005	0.021	0.01	0.001	0.009	0.016	0.012	0.005	0.026			0.213	0.311	0.251	0.353	0.276	0.217	0.156	0.269	0.291	0.273	0.179	0.324	0.058	-0.09	0.016	0	0.026	-0.03	0.073	-0.03	0.069	0.043
12.33	0.088	0.125	0.083	0.025	0.053	0.078	0.122	0.082	0.038	0.058	0.052	0.025	0.016	0	0.018	0.013	0	0.013	0.019	0.017	0.005	0.026			0.183	0.251	0.202	0.342	0.244	0.168	0.189	0.205	0.216	0.262	0.153	0.311	0.066	-0.11	-0.03	-0.01	0.032	-0.03	0.049	-0.09	0.008	0.03
12.67	0.09	0.135	0.09	0.027	0.06	0.079	0.131	0.086	0.042	0.056	0.061	0.031	0.016	0	0.017	0.016	0.002	0.012	0.021	0.019	0.005	0.028			0.13	0.23	0.197	0.301	0.225	0.15	0.163	0.176	0.201	0.139	0.16	0.318	0.072	-0.1	-0.09	-0.03	0.014	-0.06	-0.01	-0.07	0.033	0.017
13	0.087	0.143	0.09	0.029	0.059	0.08	0.128	0.091	0.046	0.053	0.064	0.034	0.016	0.005	0.02	0.018	0.0007	0.011	0.027	0.022	0.009	0.027			0.127	0.239	0.177	0.28	0.217	0.192	0.099	0.211	0.196	0.137	0.139	0.276	0.023	-0.09	-0.11	-0.04	0.012	-0.08	-0.04	-0.07	0.024	0.052
13.33	0.077	0.151	0.093	0.035	0.065	0.09	0.133	0.097	0.051	0.072	0.067	0.028	0.013	0.003	0.024	0.022	0	0.009	0.031	0.026	0.012	0.025			0.131	0.221	0.204	0.269	0.179	0.208	0.086	0.213	0.16	0.203	0.069	0.279	0.018	-0.07	-0.1	-0.04	-0.02	-0.15	0.02	-0.09	0.009	0.065
13.67	0.074	0.159	0.098	0.047	0.072	0.097	0.138	0.099	0.051	0.08	0.064	0.027	0.009	0.005	0.022	0.025	0	0.011	0.035	0.025	0.013	0.025			0.121	0.21	0.179	0.234	0.144	0.187	0.054	0.234	0.191	0.158	0.018	0.287	0	-0.07	-0.07	-0.07	-0.04	-0.19	0.011	-0.14	0	0.032
14	0.077	0.161	0.102	0.045	0.076	0.096	0.145	0.101	0.053	0.088	0.061	0.026	0.004	0.007	0.022	0.029	0	0.014	0.04	0.025	0.014	0.026			0.115	0.201	0.167	0.249	0.123	0.198	-0.04	0.26	0.177	0.188	0.042	0.241	-0.01	-0.04	-0.05	-0.05	-0.04	-0.17	-0.06	-0.11	-0.02	0.035
14.33	0.079	0.169	0.104	0.046	0.076	0.103	0.145	0.101	0.053	0.092	0.06	0.025	0.001	0.011	0.026	0.032	0	0.017	0.043	0.025	0.017	0.02			0.106	0.174	0.118	0.249	0.092	0.137	-0.03	0.27	0.156	0.218	-0.02	0.261	0	-0.05	-0.02	-0.03	-0.04	-0.17	-0.03	-0.12	0.0009	0.029
14.67	0.086	0.173	0.109	0.048	0.085	0.103	0.146	0.103	0.053	0.096	0.052	0.025	0	0.012	0.028	0.036	0.002	0.018	0.048	0.033	0.021	0.014			0.116	0.164	0.142	0.239	0.113	0.08	-0.01	0.159	0.138	0.148	0.034	0.265	-0.01	-0.07	-0.01	-0.05	-0.02	-0.2	-0.03	-0.09	-0.01	0
15	0.09	0.179	0.113	0.04	0.091	0.098	0.153	0.105	0.049	0.101	0.049	0.021	0	0.014	0.028	0.037	0.005	0.019	0.05	0.036	0.02	0.012			0.089	0.105	0.136	0.179	0.152	0.09	-0.01	0.065	0.148	0.099	0.008	0.245	-0.02	-0.08	-0.01	-0.07	-0.01	-0.21	-0.05	-0.06	-0.04	-0.01
15.33	0.089	0.183	0.115	0.035	0.089	0.103	0.16	0.104	0.047	0.105	0.051	0.017	-0.01	0.014	0.026	0.037	0.006	0.021	0.051	0.036	0.022	0.009			0.084	0.058	0.163	0.152	0.12	-0.01	-0.03	0.021	0.172	0.087	-0.01	0.223	-0.03	-0.11	-0.07	-0.04	0	-0.16	-0.05	-0.07	-0.03	-0.03
15.67	0.087	0.187	0.115	0.034	0.088	0.111	0.158	0.102	0.054	0.1	0.056	0.016	-0.01	0.015	0.024	0.033	0.003	0.022	0.055	0.041	0.024	0.006			0.075	0.036	0.132	0.122	0.083	-0.01	-0.07	0.011	0.112	0.052	-0.04	0.171	0.017	-0.11	-0.12	-0.04	-0.04	-0.15	-0.03	-0.06	-0.06	0
16	0.086	0.187	0.115	0.055	0.087	0.113	0.151	0.097	0.057	0.093	0.055	0.005	0	0.015	0.028	0.031	0.0007	0.021	0.061	0.044	0.027	0.003			0.046	0.005	0.076	0.105	0.033	0.01	-0.02	-0.02	0.096	0.047	-0.07	0.141	0.023	-0.08	-0.07	-0.05	-0.06	-0.14	-0.04	-0.12	-0.07	-0.01
16.33	0.086	0.181	0.112	0.069	0.081	0.105	0.149	0.091	0.057	0.086	0.05	0.002	0.0006	0.018	0.031	0.029	0	0.023	0.07	0.048	0.027	0.002			0.033	-0.04	0.063	0.12	-0.03	0.095	0.026	-0.02	0.122	0.027	0.014	0.149	-0.01	-0.08	-0.04	-0.06	-0.07	-0.13	-0.06	-0.12	-0.06	0.012
16.67	0.09	0.173	0.112	0.071	0.079	0.118	0.144	0.082	0.055	0.081	0.052	0.006	0.005	0.02	0.035	0.029	0	0.024	0.074	0.054	0.027	0.0003			0.022	0.004	0.113	0.108	-0.07	0.013	0.074	-0.07	0.066	0.018	-0.06	0.146	-0.05	-0.07	-0.02	-0.1	-0.05	-0.13	-0.06	-0.08	-0.11	0.029
17	0.092	0.176	0.106	0.072	0.072	0.118	0.143	0.077	0.055	0.074	0.056	0.01	0.007	0.023	0.038	0.033	0	0.026	0.077	0.058	0.031	0.0007			0.017	-0.04	0.066	0.114	-0.03	0	0	-0.13	0.039	-0.04	-0.08	0.159	-0.05	-0.05	-0.01	-0.11	-0.06	-0.12	-0.03	-0.08	-0.13	0.024
17.33	0.089	0.174	0.103	0.072	0.066	0.099	0.138	0.081	0.058	0.068	0.054	0.013	0.01	0.024	0.037	0.038	0.006	0.026	0.078	0.055	0.035	0.0002			0.043	-0.04	0.084	0.106	0	0.022	-0.06	-0.12	0.06	-0.01	-0.09	0.191	-0.1	-0.05	0.02	-0.1	0	-0.14	-0.05	-0.09	-0.15	0.019
17.67	0.087	0.176	0.097	0.072	0.062	0.107	0.133	0.08	0.061	0.058	0.049	0.006	0.014	0.019	0.04	0.039	0.011	0.025	0.079	0.049	0.037	0			0.038	-0.02	0.092	0.088	-0.01	-0.04	0.001	-0.1	0.053	-0.02	-0.07	0.16	-0.12	-0.1	0	-0.08	0.0006	-0.17	-0.07	-0.1	-0.11	0.031
18	0.089	0.18	0.091	0.062	0.056	0.11	0.133	0.079	0.062	0.044	0.044	0.004	0.016	0.016	0.044	0.04	0.021	0.024	0.08	0.045	0.04	-0.01			-0.02	-0.02	0.076	0.086	0.0008	-0.03	0.026	-0.1	0.055	-0.04	-0.08	0.16	-0.09	-0.11	-0.05	-0.1	0.006	-0.17	-0.08	-0.07	-0.11	0.039
18.33	0.092	0.184	0.091	0.05	0.056	0.115	0.13	0.081	0.063	0.031	0.038	0.008	0.018	0.013	0.049	0.04	0.022	0.023	0.08	0.044	0.043	0			0.016	0.031	0.056	0.046	0.035	-0.01	0.046	-0.06	0.045	-0.1	-0.05	0.14	-0.09	-0.1	-0.04	-0.08	-0.05	-0.16	-0.04	-0.05	-0.14	0.044
18.67	0.089	0.186	0.089	0.051	0.053	0.117	0.133	0.083	0.063	0.027	0.032	0.011	0.022	0.011	0.051	0.044	0.02	0.023	0.079	0.047	0.049	0			0.051	-0.01	0.053	0.041	0.005	-0.01	-0.02	-0.1	0.083	-0.07	-0.06	0.102	-0.1	-0.11	-0.04	-0.07	-0.08	-0.13	-0.06	-0.11	-0.14	0.023
19	0.084	0.187	0.085	0.05	0.053	0.111	0.128	0.085	0.061	0.03	0.028	0.003	0.026	0.012	0.051	0.047	0.02	0.024	0.082	0.045	0.049	0			0.077	0	0.081	0.018	-0.03	-0.03	-0.07	-0.09	0.061	-0.08	-0.07	0.11	-0.11	-0.15	-0.04	-0.09	-0.06	-0.14	-0.09	-0.19	-0.18	0.049
19.33	0.078	0.187	0.081	0.049	0.059	0.106	0.123	0.082	0.064	0.027	0.026	0	0.027	0.013	0.054	0.048	0.02	0.022	0.082	0.04	0.047	-0.01			0.064	-0.03	0.036	0.014	-0.05	-0.04	-0.02	-0.09	0.012	-0.1	-0.08	0.099	-0.16	-0.19	-0.08	-0.07	-0.04	-0.13	-0.07	-0.19	-0.22	0.027
19.67	0.074	0.186	0.08	0.052	0.061	0.104	0.123	0.074	0.062	0.026	0.027	0	0.023	0.012	0.056	0.049	0.015	0.022	0.078	0.036	0.044	-0.01			-0.07	-0.03	-0.05	0.035	-0.04	0.035	-0.04	-0.1	0.022	-0.08	-0.11	0.089	-0.13	-0.13	-0.01	-0.1	0	-0.04	-0.02	-0.15	-0.25	-0.02
20	0.063	0.186	0.08	0.041	0.057	0.086	0.127	0.05	0.049	0.017	0.026	0.002	0.003	-0.02	0.027	0.032	-0.01	0.025	0.074	0.029	0.046	-0.01			-0.11	0.064	0.012	0.053	-0.03	0.037	0.049	-0.15	0.041	-0.03	-0.14	0.126	-0.07	-0.03	0.006	-0.08	-0.04	-0.05	0.038	-0.02	-0.17	-0.07
20.33	0.053	0.184	0.076	0.042	0.051	0.076	0.118	0.044	0.041	0.011	0.016	0.009	-0.01	-0.03	0.018	0.019	-0.02	-0.04	0.058	0.005	-0.01	-0.04			-0.08	0.117	0.111	0.079	-0.04	0.001	0.059	-0.11	0.032	-0.03	-0.11	0.118	-0.08	0.085	0.017	-0.09	-0.07	0.009	-0.01	-0.02	-0.16	-0.03
20.67	0.054	0.18	0.068	0.042	0.045	0.088	0.116	0.045	0.037	0.01	0.014	0.006	0.0004	-0.02	0.016	0.016	-0.01	-0.06	0.051	-0.01	-0.03	-0.05			-0.12	0.071	0.171	0.079	0	-0.02	0.064	-0.03	0.071	-0.08	-0.11	0.13	-0.04	0.168	0.007	-0.06	-0.08	0.067	-0.1	-0.01	-0.18	-0.02
21	0.051	0.182	0.068	0.037	0.045	0.09	0.123	0.045	0.036	0.011	0.015	0.008	0.008	-0.01	0.02	0.021	-0.01	-0.06	0.058	-0.01	-0.03	-0.05			-0.07	0.079	0.158	0.039	0.051	-0.03	0.063	0.049	0.046	-0.11	-0.1	0.13	-0.03	0.116	0.014	-0.02	-0.06	0.025	-0.12	-0.06	-0.13	0
21.33	0.041	0.18	0.07	0.038	0.048	0.083	0.128	0.043	0.034	0.014	0.018	0.003	0.012	-0.01	0.026	0.021	0	-0.06	0.062	0	-0.03	-0.05			0.003	0.027	0.1	0.031	0.03	-0.03	0.07	0.048	0.072	-0.1	-0.08	0.108	-0.04	0.005	0.06	-0.01	-0.11	0.035	-0.06	-0.01	-0.13	0.058
21.67	0.031	0.18	0.072	0.039	0.047	0.08	0.128	0.042	0.036	0.014	0.019	0	0.014	-0.01	0.031	0.021	0.002	-0.06	0.067	0	-0.03	-0.05			-0.01	-0.01	0.04	2e-05	0	-0.04	0.022	-0.01	0.037	-0.15	-0.08	0.054	-0.09	0.047	0.053	0.017	-0.09	0.084	0	0.048	-0.11	0.123
22	0.027	0.175	0.078	0.038	0.048	0.081	0.129	0.04	0.037	0.012	0.016	-0.01	0.02	0	0.034	0.023	0.009	-0.05	0.066	0	-0.03	-0.04			-0.07	-0.06	0	-0.03	0.005	-0.1	0.038	-0.01	-0.01	-0.12	-0.11	0.01	-0.1	0.01	0.076	0.014	-0.08	0.065	0.011	0.08	-0.05	0.137
22.33	0.022	0.169	0.079	0.036	0.049	0.077	0.126	0.038	0.038	0.009	0.011	-0.01	0.023	-0.01	0.035	0.026	0.013	-0.05	0.066	0.005	-0.02	-0.04			-0.06	-0.08	-0.08	-0.06	-0.01	-0.15	-0.02	-0.02	-0.05	-0.05	-0.18	-0.01	-0.09	-0.05	0.12	0.031	-0.09	0.011	0.024	0.101	-0.06	0.127
22.67	0.029	0.162	0.078	0.033	0.051	0.072	0.122	0.037	0.034	0.004	0.006	-0.02	0.021	-0.01	0.038	0.029	0.02	-0.04	0.065	0.008	-0.02	-0.04			0.008	-0.08	-0.14	-0.06	-0.06	-0.14	-0.01	-0.03	-0.09	-0.03	-0.18	0.03	-0.07	-0.08	0.11	0.008	-0.13	-0.01	0.051	0.088	-0.09	0.124
23	0.034	0.158	0.074	0.036	0.054	0.058	0.114	0.035	0.03	0.003	0.002	-0.03	0.026	-0.01	0.039	0.031	0.026	-0.04	0.067	0.006	-0.02	-0.03			0.015	-0.12	-0.16	-0.08	-0.05	-0.18	0.038	-0.07	-0.13	-0.13	-0.16	0.001	-0.05	-0.03	0.091	0.003	-0.12	-0.05	0.028	0.134	-0.07	0.07
23.33	0.026	0.152	0.067	0.046	0.053	0.037	0.095	0.034	0.027	-0.01	0	-0.03	0.031	-0.01	0.039	0.031	0.028	-0.04	0.068	0.003	-0.02	-0.03			0.001	-0.15	-0.19	-0.07	-0.05	-0.21	0.078	-0.04	-0.13	-0.19	-0.13	0.015	-0.07	-0.09	0.058	-0.01	-0.16	-0.01	-0.01	0.098	-0.11	0.059
23.67	0.019	0.15	0.06	0.048	0.051	0.017	0.093	0.034	0.025	-0.01	-0.01	-0.04	0.038	-0.01	0.044	0.028	0.028	-0.04	0.072	0.004	-0.02	-0.03			0	-0.18	-0.15	-0.05	-0.04	-0.19	0.11	-0.06	-0.12	-0.13	-0.06	0.066	-0.15	-0.09	0.033	-0.01	-0.21	-0.02	0.019	0.069	-0.11	0.088
24	0.02	0.148	0.055	0.051	0.047	0.011	0.095	0.035	0.024	0	-0.01	-0.03	0.039	-0.01	0.045	0.031	0.033	-0.04	0.07	0.002	-0.02	-0.03			-0.01	-0.23	-0.12	-0.04	-0.05	-0.18	0.166	-0.12	-0.12	-0.03	-0.03	0.063	-0.11	-0.09	0.045	-0.05	-0.17	0.026	-0.01	0.025	-0.09	0.091
24.33	0.023	0.145	0.048	0.05	0.043	0.017	0.092	0.035	0.023	0	0	-0.01	0.039	-0.01	0.044	0.035	0.042	-0.04	0.07	0.002	-0.02	-0.03			-0.02	-0.22	-0.11	-0.08	-0.07	-0.18	0.15	-0.15	-0.12	-0.03	-0.07	0.029	-0.11	-0.1	0.025	-0.02	-0.17	0.043	0.035	0.056	-0.05	0.043
24.67	0.021	0.138	0.048	0.051	0.043	0.017	0.081	0.034	0.022	0	0.001	0.01	0.04	-0.01	0.043	0.038	0.046	-0.04	0.068	0.004	-0.01	-0.01			-0.03	-0.26	-0.11	-0.12	-0.12	-0.11	0.015	-0.17	-0.13	-0.05	-0.08	0.002	-0.14	-0.1	-0.02	-0.02	-0.18	0.036	0.036	0.085	-0.05	0
25	0.023	0.13	0.05	0.048	0.039	0.02	0.073	0.032	0.019	0	0	0.015	0.044	-0.01	0.044	0.038	0.048	-0.04	0.066	0.003	-0.01	0.003			-0.05	-0.3	-0.22	-0.17	-0.15	-0.03	-0.08	-0.16	-0.15	-0.04	-0.09	0.0007	-0.09	-0.13	-0.03	-0.01	-0.18	0.039	-0.01	0.087	-0.06	0.027
25.33	0.031	0.126	0.048	0.046	0.04	0.021	0.065	0.028	0.016	0	-0.01	0.011	0.052	-0.02	0.044	0.04	0.045	-0.04	0.067	0.0003	-0.01	0.008			-0.04	-0.25	-0.2	-0.15	-0.15	0.063	-0.08	-0.14	-0.17	-0.03	-0.09	0.013	-0.13	-0.12	-0.04	-0.02	-0.2	0.008	-0.07	-0.01	-0.11	0.04
25.67	0.047	0.126	0.046	0.039	0.038	0.018	0.062	0.026	0.011	0.002	0	0.004	0.049	-0.02	0.045	0.044	0.048	-0.04	0.066	-0.01	-0.01	0.007			-0.07	-0.24	-0.16	-0.09	-0.07	0.048	-0.07	-0.16	-0.16	-0.09	-0.09	0.059	-0.18	-0.12	-0.07	-0.07	-0.24	-0.04	-0.08	-0.03	-0.18	0.047
26	0.054	0.122	0.052	0.034	0.035	0.011	0.054	0.027	0.009	0.007	0	0.001	0.042	-0.02	0.046	0.046	0.046	-0.04	0.064	-0.01	-0.01	0.009			-0.03	-0.24	-0.14	-0.07	-0.07	0.022	-0.05	-0.15	-0.19	-0.12	-0.13	0.079	-0.17	-0.14	-0.05	-0.08	-0.18	-0.08	-0.02	-0.06	-0.18	0.0002
26.33	0.048	0.114	0.056	0.027	0.034	0.008	0.042	0.026	0.006	0.014	-0.01	0	0.038	-0.03	0.048	0.05	0.039	-0.03	0.067	0	-0.01	0.009			-0.02	-0.3	-0.12	-0.1	-0.12	0	0.03	-0.13	-0.17	-0.09	-0.09	0.08	-0.19	-0.16	-0.03	-0.07	-0.19	-0.12	-0.03	-0.06	-0.21	-0.02
26.67	0.041	0.116	0.053	0.031	0.031	0	0.042	0.023	0	0.014	-0.01	0.002	0.037	-0.03	0.048	0.054	0.038	-0.03	0.069	0.001	-0.01	0.013			0.017	-0.32	-0.17	-0.1	-0.09	-0.01	0.042	-0.14	-0.13	-0.03	-0.06	0.058	-0.19	-0.17	-0.01	-0.04	-0.23	-0.12	-0.04	-0.06	-0.22	-0.03
27	0.039	0.122	0.051	0.035	0.026	-0.01	0.039	0.018	-0.01	0.006	-0.01	0.01	0.038	-0.03	0.045	0.056	0.04	-0.03	0.072	0.002	-0.01	0.009			0.042	-0.33	-0.17	-0.11	-0.02	-0.07	-0.01	-0.15	-0.13	-0.1	-0.1	0.031	-0.18	-0.14	0.005	-0.08	-0.26	-0.09	-0.11	-0.1	-0.26	-0.07
27.33	0.03	0.122	0.053	0.034	0.041	-0.02	0.029	0.015	-0.02	0	-0.01	0.01	0.044	-0.02	0.043	0.053	0.039	-0.03	0.071	0	-0.01	0.005			0.04	-0.27	-0.16	-0.05	-0.04	-0.09	-0.07	-0.18	-0.09	-0.11	-0.04	0.062	-0.15	-0.16	0.011	-0.07	-0.22	-0.06	-0.11	-0.12	-0.19	-0.1
27.67	0.016	0.123	0.053	0.037	0.04	-0.03	0.022	0.017	-0.01	-0.01	0	0	0.05	-0.01	0.042	0.053	0.04	-0.02	0.069	0	-0.01	0.005			0.018	-0.25	-0.15	-0.04	-0.09	-0.09	-0.07	-0.17	-0.06	-0.09	-0.04	0.012	-0.18	-0.2	0	-0.1	-0.21	-0.07	-0.09	-0.12	-0.18	-0.07
28	0.005	0.121	0.049	0.046	0.039	-0.04	0.021	0.021	-0.02	-0.02	0.004	-0.01	0.054	-0.02	0.043	0.055	0.044	-0.02	0.067	0	-0.01	0.002			0.011	-0.26	-0.07	-0.07	-0.16	-0.08	0.031	-0.13	-0.05	-0.06	-0.09	-0.03	-0.23	-0.19	-0.03	-0.08	-0.22	-0.08	-0.04	-0.11	-0.16	-0.09
28.33	0	0.116	0.046	0.059	0.042	-0.05	0.022	0.024	-0.02	-0.01	0.005	-0.01	0.061	-0.02	0.044	0.053	0.046	-0.02	0.066	-0.01	-0.01	0.002			-0.02	-0.25	-0.05	-0.11	-0.2	-0.12	0.036	-0.1	-0.05	0.004	-0.09	0.02	-0.25	-0.11	-0.05	-0.08	-0.23	0	-0.07	-0.14	-0.17	-0.11
28.67	0.002	0.113	0.038	0.067	0.044	-0.05	0.016	0.025	-0.02	-0.01	0	0	0.07	-0.02	0.041	0.053	0.05	-0.02	0.066	0	0	0.003			-0.01	-0.27	-0.04	-0.16	-0.14	-0.12	0.048	-0.13	-0.05	-0.03	-0.08	0.041	-0.22	-0.1	-0.02	-0.07	-0.21	-0.03	-0.03	-0.14	-0.19	-0.13
29	0.005	0.112	0.031	0.06	0.041	-0.05	0.015	0.025	-0.02	-0.02	-0.02	0.009	0.078	-0.02	0.04	0.053	0.053	-0.01	0.067	0	0	0.003			-0.04	-0.25	0.002	-0.16	-0.14	-0.12	0.07	-0.1	-0.05	0.001	-0.07	0.008	-0.2	-0.08	-0.03	-0.05	-0.18	-0.1	-0.09	-0.17	-0.2	-0.08
29.33	0.008	0.108	0.028	0.045	0.042	-0.05	0.013	0.024	-0.02	-0.02	-0.02	0.018	0.083	-0.02	0.041	0.053	0.055	-0.01	0.066	0.0003	0	0.002			-0.06	-0.27	-0.04	-0.17	-0.17	-0.15	-0.03	-0.03	-0.02	0.053	-0.03	0.02	-0.2	-0.09	-0.06	-0.06	-0.15	-0.12	-0.1	-0.2	-0.14	-0.09
29.67	0.016	0.106	0.022	0.031	0.045	-0.05	0.013	0.023	-0.02	-0.02	-0.01	0.013	0.084	-0.02	0.041	0.05	0.051	-0.01	0.064	0.004	-0.01	0			-0.04	-0.23	-0.01	-0.15	-0.14	-0.17	-0.11	0.004	-0.03	0.023	-0.14	0.046	-0.21	-0.11	-0.08	-0.1	-0.12	-0.13	-0.09	-0.16	-0.09	-0.06
30	0.016	0.097	0.016	0.035	0.052	-0.04	0.02	0.024	-0.01	-0.03	-0.01	9e-05	0.082	-0.02	0.043	0.05	0.047	-0.01	0.058	0.008	-0.01	0			0.007	-0.23	-0.02	-0.13	-0.16	-0.18	-0.12	-0.03	-0.01	0.01	-0.11	0.054	-0.24	-0.09	-0.08	-0.11	-0.21	-0.09	-0.1	-0.13	-0.07	-0.05
30.33	0.011	0.098	0.017	0.039	0.057	-0.04	0.022	0.026	-0.01	-0.03	-0.01	-0.02	0.078	-0.02	0.044	0.053	0.048	0	0.059	0.011	-0.01	-0.01			0.013	-0.26	-0.04	-0.12	-0.15	-0.21	-0.08	-0.07	0.023	0	-0.06	0.013	-0.22	-0.04	-0.07	-0.11	-0.27	-0.12	-0.11	-0.14	-0.06	-0.09
30.67	0.01	0.098	0.014	0.039	0.056	-0.04	0.016	0.028	-0.01	-0.02	-0.02	-0.03	0.07	-0.02	0.043	0.051	0.046	0	0.059	0.014	-0.01	-0.01			-0.03	-0.25	-0.07	-0.12	-0.13	-0.16	0.025	-0.05	0.014	0.036	-0.07	0	-0.19	-0.08	-0.09	-0.12	-0.28	-0.12	-0.15	-0.17	-0.12	-0.09
31	0.011	0.095	0.01	0.027	0.058	-0.03	0.014	0.031	-0.01	-0.02	-0.02	-0.02	0.071	-0.01	0.04	0.05	0.047	0	0.055	0.013	-0.01	-0.01			-0.06	-0.29	-0.02	-0.12	-0.1	-0.16	0.052	-0.08	0.007	0.057	-0.06	0.026	-0.2	-0.08	-0.14	-0.15	-0.25	-0.16	-0.13	-0.13	-0.14	-0.09
31.33	0.011	0.094	0.01	0.021	0.056	-0.03	0.01	0.034	-0.01	-0.02	-0.02	-0.01	0.071	-0.01	0.038	0.047	0.044	0	0.055	0.012	-0.01	-0.01			-0.02	-0.32	-0.01	-0.13	-0.06	-0.14	0	-0.06	-0.01	0.073	-0.07	0.035	-0.16	-0.15	-0.14	-0.13	-0.23	-0.16	-0.12	-0.17	-0.16	-0.14
31.67	0.007	0.094	0.014	0.026	0.054	-0.04	0	0.034	-0.01	-0.02	-0.02	0	0.069	0	0.032	0.044	0.047	0	0.054	0.012	-0.01	0			0.011	-0.27	0.022	-0.12	-0.09	-0.12	-0.02	-0.09	-0.02	0.063	-0.03	0	-0.19	-0.16	-0.16	-0.11	-0.25	-0.18	-0.07	-0.17	-0.15	-0.15
32	0.005	0.09	0.016	0.033	0.05	-0.04	-0.01	0.032	-0.01	-0.02	-0.02	-0.01	0.066	0.002	0.027	0.043	0.047	0	0.054	0.008	-0.01	0			0.001	-0.21	0.024	-0.14	-0.16	-0.11	0.013	-0.1	-0.01	0.037	-0.05	0.014	-0.22	-0.15	-0.14	-0.13	-0.24	-0.15	-0.06	-0.18	-0.12	-0.12
32.33	0	0.089	0.012	0.022	0.047	-0.03	-0.01	0.027	-0.01	-0.02	-0.02	-0.01	0.065	0.004	0.026	0.042	0.043	-0.01	0.054	0.005	-0.01	0			0.009	-0.19	0.046	-0.17	-0.17	-0.09	0.014	-0.14	0.011	0.038	-0.11	0.025	-0.26	-0.12	-0.09	-0.15	-0.23	-0.14	-0.05	-0.2	-0.07	-0.12
32.67	0	0.088	0.008	0.024	0.041	-0.03	0	0.025	-0.01	-0.02	-0.02	-0.01	0.068	0.007	0.026	0.044	0.041	-0.01	0.053	0.007	-0.01	0.004			-0.01	-0.15	0.004	-0.22	-0.12	-0.05	0.045	-0.14	0.013	0.038	-0.17	-0.01	-0.23	-0.1	-0.1	-0.13	-0.19	-0.14	-0.07	-0.18	-0.07	-0.11
33	-0.01	0.082	0.004	0.029	0.039	-0.01	0.007	0.019	-0.01	-0.01	-0.03	-0.01	0.067	0.009	0.025	0.046	0.045	-0.01	0.05	0.007	-0.02	0.005			0.033	-0.15	-0.06	-0.2	-0.08	-0.04	0.073	-0.12	0.065	0.022	-0.18	0.009	-0.19	-0.07	-0.11	-0.13	-0.2	-0.09	-0.09	-0.17	-0.07	-0.11
33.33	-0.01	0.087	0.002	0.03	0.036	-0.02	0.015	0.016	-0.01	0	-0.04	0	0.066	0.008	0.028	0.046	0.049	-0.01	0.05	0.009	-0.02	0.007			0.039	-0.12	-0.12	-0.17	-0.07	-0.1	0.113	-0.14	0.062	1e-05	-0.18	0.053	-0.16	-0.1	-0.09	-0.13	-0.23	-0.09	-0.1	-0.18	-0.12	-0.14
33.67	-0.01	0.091	0	0.029	0.035	-0.02	0.02	0.013	-0.01	0	-0.05	0.004	0.064	0.008	0.029	0.049	0.053	-0.01	0.052	0.009	-0.02	0.013			0.017	-0.18	-0.17	-0.16	-0.06	-0.07	0.12	-0.13	-0.01	0.033	-0.15	0.053	-0.16	-0.07	-0.06	-0.17	-0.21	-0.05	-0.08	-0.18	-0.14	-0.14
34	-0.01	0.09	0.002	0.025	0.032	-0.02	0.013	0.009	-0.01	0	-0.06	0.01	0.066	0	0.029	0.048	0.056	-0.02	0.055	0.011	-0.02	0.015			0.009	-0.17	-0.24	-0.12	-0.09	-0.05	0.087	-0.12	-0.02	0.021	-0.07	0.045	-0.16	-0.07	-0.09	-0.18	-0.17	-0.08	-0.09	-0.16	-0.12	-0.12
34.33	-0.01	0.088	0.004	0.019	0.032	-0.03	0.016	0.008	-0.01	-0.01	-0.05	0.012	0.067	0	0.029	0.048	0.053	-0.02	0.059	0.013	-0.03	0.016			0.031	-0.13	-0.19	-0.12	-0.16	-0.05	0.066	-0.15	-0.02	-0.01	-0.05	0.047	-0.17	-0.07	-0.1	-0.15	-0.17	-0.14	-0.1	-0.14	-0.1	-0.15
34.67	0	0.093	0.004	0.023	0.032	-0.04	0.016	0.009	-0.02	0	-0.04	0.005	0.061	0.0003	0.026	0.045	0.05	-0.02	0.061	0.02	-0.03	0.017			0.048	-0.14	-0.18	-0.13	-0.17	-0.05	0.102	-0.13	-0.02	-0.02	-0.07	0.069	-0.15	-0.07	-0.12	-0.15	-0.16	-0.08	-0.07	-0.13	-0.08	-0.18
35	0.003	0.096	0.006	0.019	0.035	-0.04	0.019	0.009	-0.02	0.007	-0.04	0.0007	0.053	0.0004	0.028	0.044	0.05	-0.01	0.06	0.027	-0.03	0.018			0.023	-0.08	-0.14	-0.1	-0.17	-0.01	0.122	-0.1	0.022	-0.03	-0.13	0.116	-0.15	-0.07	-0.13	-0.16	-0.2	-0.14	-0.04	-0.1	-0.06	-0.16
35.33	0.0009	0.099	0.005	0.015	0.039	-0.04	0.031	0.01	-0.02	0.01	-0.04	0.003	0.052	0.002	0.026	0.039	0.048	-0.01	0.059	0.024	-0.02	0.02			0.039	-0.04	-0.07	-0.12	-0.15	0	0.113	-0.12	0.059	-0.02	-0.11	0.113	-0.18	-0.09	-0.16	-0.15	-0.19	-0.18	-0.06	-0.09	-0.02	-0.15
35.67	0	0.1	0	0.026	0.04	-0.04	0.041	0.009	-0.01	0.015	-0.05	0.007	0.052	0.004	0.023	0.037	0.048	-0.01	0.059	0.025	-0.01	0.021			0	-0.09	-0.03	-0.1	-0.14	-0.04	0.11	-0.14	0.059	-0.03	-0.01	0.079	-0.23	-0.07	-0.15	-0.17	-0.21	-0.19	-0.07	-0.11	-0.06	-0.14
36	-0.01	0.101	0	0.032	0.039	-0.04	0.048	0.007	-0.01	0.018	-0.05	0.015	0.052	0.006	0.017	0.035	0.051	-0.01	0.057	0.027	-0.01	0.02			-0.01	-0.09	-0.05	-0.1	-0.16	-0.09	0.086	-0.16	0.05	-0.04	0.021	0.042	-0.23	-0.06	-0.1	-0.19	-0.19	-0.17	-0.09	-0.1	-0.12	-0.11
36.33	-0.01	0.101	-0.01	0.034	0.034	-0.04	0.057	0.009	-0.01	0.017	-0.04	0.015	0.051	0.006	0.018	0.033	0.051	-0.01	0.055	0.027	-0.01	0.018			0.013	-0.11	-0.02	-0.13	-0.12	-0.11	0.059	-0.13	0.014	-0.08	0.002	0.03	-0.2	-0.07	-0.14	-0.21	-0.09	-0.16	-0.1	-0.12	-0.14	-0.13
36.67	-0.02	0.103	-0.01	0.032	0.028	-0.03	0.057	0.008	-0.01	0.01	-0.03	0.017	0.05	0.007	0.018	0.03	0.046	-0.01	0.055	0.018	0	0.017			0.001	-0.1	-0.06	-0.14	-0.12	-0.1	0.05	-0.07	-0.02	-0.07	-0.07	0.043	-0.19	-0.07	-0.12	-0.2	-0.1	-0.13	-0.13	-0.11	-0.1	-0.17
37	-0.04	0.101	-0.01	0.034	0.026	-0.02	0.064	0.007	-0.01	0.008	-0.03	0.016	0.051	0.006	0.022	0.028	0.048	-0.01	0.056	0.017	0.006	0.016			0.003	-0.11	-0.11	-0.16	-0.05	-0.09	0.036	-0.06	0.0003	-0.06	-0.03	0.037	-0.15	-0.11	-0.13	-0.16	-0.14	-0.16	-0.16	-0.12	-0.16	-0.13
37.33	-0.05	0.102	0	0.046	0.024	-0.01	0.068	0.004	-0.01	0.008	-0.02	0.012	0.047	0.004	0.024	0.028	0.049	-0.01	0.052	0.017	0.01	0.017			-0.03	-0.16	-0.06	-0.15	-0.03	-0.07	-0.02	-0.07	-0.04	-0.05	-0.04	0.052	-0.16	-0.11	-0.17	-0.17	-0.13	-0.2	-0.15	-0.14	-0.18	-0.1
37.67	-0.05	0.102	0.001	0.045	0.023	-0.02	0.066	0.003	-0.02	0.007	-0.02	0	0.04	0.002	0.026	0.026	0.05	-0.01	0.051	0.013	0.011	0.015			-0.03	-0.17	0.01	-0.15	-0.05	-0.06	0.007	-0.08	-0.03	-0.05	-0.07	0.127	-0.2	-0.1	-0.16	-0.19	-0.12	-0.21	-0.13	-0.16	-0.18	-0.1
38	-0.05	0.106	0.001	0.039	0.025	-0.01	0.057	0.002	-0.02	0.011	-0.02	-0.02	0.035	0.001	0.025	0.026	0.05	-0.01	0.052	0.007	0.01	0.011			-0.06	-0.1	0.008	-0.16	-0.06	-0.08	0.057	-0.04	-0.02	0.009	-0.04	0.111	-0.15	-0.1	-0.16	-0.19	-0.1	-0.24	-0.1	-0.11	-0.16	-0.12
38.33	-0.06	0.106	0.006	0.046	0.027	-0.01	0.061	0.0004	-0.02	0.009	-0.02	-0.02	0.03	0	0.027	0.026	0.052	-0.01	0.051	0.003	0.008	0.011			-0.09	-0.13	0.008	-0.19	-0.05	-0.1	0.051	-0.07	-0.03	0.046	0.01	0.113	-0.14	-0.07	-0.15	-0.18	-0.08	-0.22	-0.08	-0.09	-0.14	-0.14
38.67	-0.06	0.102	0.009	0.043	0.028	-0.01	0.063	0	-0.02	0.012	-0.02	-0.03	0.034	0.0006	0.032	0.026	0.049	-0.01	0.046	0	0.008	0.013			-0.11	-0.18	0.049	-0.21	-0.06	-0.08	0.029	-0.07	-0.05	0.058	-0.04	0.115	-0.18	-0.08	-0.14	-0.19	-0.12	-0.21	-0.14	-0.09	-0.08	-0.13
39	-0.06	0.102	0.005	0.043	0.028	-0.01	0.06	-0.01	-0.03	0.014	-0.01	-0.04	0.036	0	0.035	0.023	0.047	-0.01	0.041	0	0.007	0.012			-0.1	-0.18	-0.01	-0.21	-0.07	-0.06	0.04	-0.06	-0.04	0.031	-0.13	0.096	-0.19	-0.09	-0.19	-0.18	-0.14	-0.21	-0.13	-0.18	-0.1	-0.14
39.33	-0.07	0.098	0.002	0.042	0.03	-0.01	0.054	-0.01	-0.03	0.017	-0.01	-0.04	0.035	0	0.034	0.02	0.044	0	0.042	0.003	0.003	0.01			-0.11	-0.15	-0.01	-0.21	-0.1	-0.11	0.084	-0.07	-0.02	0.067	-0.17	0.075	-0.24	-0.08	-0.21	-0.16	-0.15	-0.2	-0.08	-0.21	-0.18	-0.13
39.67	-0.06	0.092	-0.01	0.046	0.029	-0.01	0.049	-0.01	-0.03	0.017	-0.02	-0.04	0.038	0.002	0.032	0.02	0.046	0	0.038	6e-05	0.002	0.011			-0.1	-0.14	-0.08	-0.2	-0.08	-0.11	0.062	-0.07	-0.05	0.052	-0.14	0.035	-0.22	-0.05	-0.25	-0.18	-0.19	-0.19	-0.09	-0.16	-0.17	-0.15
40	-0.06	0.088	-0.01	0.047	0.019	-0.02	0.052	-0.01	-0.03	0.025	-0.02	-0.05	0.043	0.008	0.034	0.02	0.039	0.0008	0.036	0.002	0.001	0.02			-0.16	-0.13	-0.09	-0.19	-0.05	-0.08	0.055	-0.15	-0.07	-0.01	-0.13	0.015	-0.19	-0.06	-0.24	-0.21	-0.17	-0.21	-0.1	-0.12	-0.12	-0.15
40.33	-0.06	0.084	0.004	0.048	0.014	-0.02	0.052	-0.01	-0.04	0.028	-0.03	-0.05	0.044	0.01	0.035	0.022	0.042	0	0.038	0.007	0.001	0.023			-0.12	-0.09	-0.04	-0.17	-0.04	-0.11	0.033	-0.19	-0.01	0.005	-0.14	-0.02	-0.18	-0.08	-0.2	-0.21	-0.15	-0.2	-0.1	-0.08	-0.11	-0.12
40.67	-0.06	0.075	0.012	0.05	0.01	-0.02	0.055	-0.01	-0.04	0.028	-0.04	-0.05	0.039	0.013	0.035	0.023	0.041	0	0.037	0.011	0.004	0.023			-0.12	-0.11	-0.06	-0.17	-0.09	-0.15	0.065	-0.18	0	0.056	-0.09	-0.05	-0.22	-0.05	-0.19	-0.19	-0.16	-0.22	-0.15	-0.09	-0.16	-0.13
41	-0.06	0.062	0.015	0.042	0.007	-0.03	0.053	-0.01	-0.05	0.025	-0.04	-0.04	0.04	0.017	0.035	0.022	0.046	0	0.035	0.012	0.007	0.02			-0.12	-0.16	-0.14	-0.19	-0.12	-0.12	0.058	-0.18	-0.04	0.029	-0.04	-0.02	-0.23	-0.02	-0.18	-0.2	-0.24	-0.28	-0.19	-0.13	-0.16	-0.14
41.33	-0.06	0.049	0.011	0.034	0.003	-0.03	0.045	-0.02	-0.05	0.02	-0.05	-0.03	0.044	0.021	0.036	0.016	0.043	-0.01	0.033	0.009	0.006	0.018			-0.1	-0.15	-0.11	-0.21	-0.16	-0.11	0.059	-0.14	-0.05	0.01	-0.05	0.016	-0.24	-0.04	-0.16	-0.21	-0.24	-0.28	-0.22	-0.12	-0.15	-0.14
41.67	-0.06	0.041	0.007	0.033	-0.01	-0.04	0.038	-0.02	-0.05	0.02	-0.05	-0.02	0.041	0.024	0.035	0.017	0.041	-0.01	0.031	0.009	0.006	0.011			-0.13	-0.13	-0.11	-0.25	-0.19	-0.12	0.038	-0.09	-0.01	0.02	-0.07	-0.01	-0.21	-0.08	-0.12	-0.18	-0.17	-0.32	-0.2	-0.14	-0.12	-0.13
42	-0.06	0.035	0	0.029	-0.01	-0.05	0.036	-0.02	-0.06	0.015	-0.05	-0.02	0.041	0.028	0.038	0.015	0.044	-0.01	0.031	0.009	0.004	0.007			-0.12	-0.09	-0.06	-0.24	-0.16	-0.14	0.042	-0.08	0.016	-0.03	-0.12	0.012	-0.21	-0.08	-0.2	-0.18	-0.18	-0.37	-0.21	-0.18	-0.15	-0.16
42.33	-0.06	0.029	-0.01	0.026	0	-0.05	0.031	-0.03	-0.06	0.008	-0.06	-0.02	0.038	0.031	0.044	0.009	0.043	-0.01	0.03	0.008	0.001	0.003			-0.14	-0.13	-0.06	-0.21	-0.12	-0.15	0.026	-0.1	0.012	-0.1	-0.14	0.065	-0.19	-0.05	-0.18	-0.19	-0.21	-0.32	-0.17	-0.23	-0.14	-0.11
42.67	-0.08	0.03	-0.01	0.021	0.007	-0.06	0.023	-0.03	-0.06	0	-0.06	-0.02	0.036	0.035	0.046	0.008	0.041	-0.01	0.029	0.011	0	0.003			-0.09	-0.11	-0.03	-0.23	-0.1	-0.12	0	-0.11	-0.02	-0.06	-0.16	0.053	-0.24	-0.06	-0.17	-0.17	-0.19	-0.27	-0.12	-0.22	-0.19	-0.11
43	-0.09	0.032	-0.01	0.021	0.005	-0.06	0.017	-0.03	-0.05	0	-0.06	-0.03	0.035	0.045	0.049	0.006	0.034	-0.01	0.025	0.012	0	0.004			-0.1	-0.05	-0.14	-0.22	-0.1	-0.09	-0.04	-0.12	-0.06	-0.03	-0.13	0.07	-0.28	-0.06	-0.2	-0.18	-0.15	-0.26	-0.11	-0.16	-0.2	-0.12
43.33	-0.09	0.037	-0.01	0.01	0.0002	-0.06	0.023	-0.04	-0.05	0.003	-0.07	-0.03	0.026	0.051	0.048	0.005	0.029	-0.01	0.022	0.009	0	0.006			-0.11	-0.05	-0.17	-0.19	-0.12	-0.1	0.04	-0.09	-0.03	-0.05	-0.06	0.067	-0.28	-0.01	-0.16	-0.2	-0.16	-0.25	-0.18	-0.16	-0.17	-0.11
43.67	-0.09	0.039	-0.01	0.002	0	-0.07	0.031	-0.04	-0.05	0.005	-0.07	-0.03	0.025	0.058	0.05	0.004	0.027	-0.01	0.022	0.01	0	0.004			-0.09	-0.06	-0.15	-0.2	-0.09	-0.14	0.003	-0.07	0.014	-0.05	-0.11	0.075	-0.27	-0.03	-0.21	-0.2	-0.18	-0.25	-0.21	-0.12	-0.14	-0.12
44	-0.09	0.039	-0.01	0	-0.01	-0.06	0.038	-0.04	-0.05	0.004	-0.07	-0.02	0.027	0.063	0.053	0.001	0.022	-0.01	0.02	0.013	0	0.006			-0.1	-0.09	-0.2	-0.18	-0.13	-0.17	0.012	-0.11	-0.02	-0.02	-0.12	0.055	-0.26	-0.03	-0.23	-0.19	-0.21	-0.24	-0.23	-0.13	-0.18	-0.11
44.33	-0.09	0.034	0.0009	-0.01	-0.01	-0.06	0.037	-0.04	-0.05	0.002	-0.08	-0.02	0.026	0.066	0.053	0	0.016	-0.01	0.023	0.014	0	0.003			-0.04	-0.13	-0.18	-0.17	-0.15	-0.15	-0.01	-0.17	-0.06	-0.02	-0.06	0.044	-0.26	-0.06	-0.18	-0.19	-0.17	-0.31	-0.26	-0.18	-0.25	-0.12
44.67	-0.1	0.035	0.003	-0.01	-0.02	-0.07	0.036	-0.04	-0.04	0.006	-0.09	-0.01	0.032	0.067	0.054	0.002	0.016	-0.01	0.021	0.008	0.001	8e-05			-0.06	-0.11	-0.17	-0.21	-0.16	-0.17	-0.05	-0.17	-0.08	0.035	0.004	0.052	-0.28	-0.07	-0.16	-0.19	-0.18	-0.33	-0.27	-0.25	-0.22	-0.11
45	-0.09	0.039	0.002	0.008	-0.02	-0.08	0.035	-0.04	-0.04	0.002	-0.09	-0.02	0.033	0.067	0.054	0.004	0.018	-0.01	0.021	0.007	0	0.0007			-0.1	-0.14	-0.16	-0.21	-0.18	-0.15	-0.01	-0.06	-0.05	0.035	0.008	0.07	-0.21	-0.11	-0.14	-0.18	-0.16	-0.31	-0.23	-0.22	-0.22	-0.1
45.33	-0.09	0.041	0.001	0.012	-0.02	-0.09	0.028	-0.05	-0.04	0	-0.08	-0.01	0.034	0.065	0.054	0.007	0.017	-0.01	0.023	0.004	-0.01	0			-0.1	-0.17	-0.16	-0.2	-0.17	-0.17	0.018	-0.06	-0.09	0.039	-0.04	0.052	-0.19	-0.11	-0.12	-0.17	-0.19	-0.21	-0.18	-0.19	-0.2	-0.13
45.67	-0.09	0.047	0.0008	0.008	-0.02	-0.1	0.024	-0.05	-0.04	-0.01	-0.07	-0.01	0.036	0.064	0.055	0.006	0.016	-0.01	0.024	0.003	-0.01	0			-0.13	-0.21	-0.08	-0.17	-0.2	-0.17	-0.02	-0.08	-0.05	0.098	-0.05	0.003	-0.18	-0.1	-0.16	-0.16	-0.19	-0.2	-0.14	-0.22	-0.15	-0.16
46	-0.08	0.052	0	0.015	-0.02	-0.1	0.02	-0.05	-0.04	-0.02	-0.07	-0.01	0.036	0.065	0.054	0.006	0.014	-0.01	0.023	0.0003	-0.01	0			-0.15	-0.15	-0.08	-0.12	-0.14	-0.14	-0.08	-0.12	-0.05	0.107	-0.05	0.012	-0.25	-0.16	-0.19	-0.18	-0.21	-0.23	-0.18	-0.24	-0.07	-0.15
46.33	-0.07	0.053	0	0.016	-0.02	-0.1	0.007	-0.05	-0.04	-0.02	-0.07	-0.01	0.035	0.063	0.053	0.006	0.009	-0.01	0.018	0.006	-0.01	0.005			-0.09	-0.12	-0.1	-0.1	-0.12	-0.23	-0.11	-0.16	-0.08	0.094	-0.11	0.062	-0.25	-0.14	-0.27	-0.16	-0.19	-0.24	-0.2	-0.18	-0.1	-0.14
46.67	-0.06	0.057	0	0.026	-0.02	-0.11	0.008	-0.05	-0.04	-0.02	-0.08	-0.02	0.034	0.063	0.054	0.007	0.006	-0.01	0.016	0.01	-0.01	0.007			-0.14	-0.14	-0.13	-0.14	-0.09	-0.23	-0.12	-0.17	-0.05	0.062	-0.07	0.054	-0.23	-0.13	-0.24	-0.15	-0.19	-0.27	-0.2	-0.14	-0.16	-0.14
47	-0.06	0.057	0.001	0.032	-0.02	-0.11	0.006	-0.05	-0.04	-0.02	-0.07	-0.02	0.031	0.063	0.054	0.006	0.001	-0.01	0.018	0.005	-0.01	0.009			-0.16	-0.15	-0.08	-0.12	-0.12	-0.23	-0.13	-0.12	-0.03	-0.02	-0.08	0.029	-0.23	-0.11	-0.23	-0.14	-0.23	-0.19	-0.23	-0.12	-0.15	-0.16
47.33	-0.05	0.055	0.003	0.038	-0.02	-0.11	0.003	-0.05	-0.04	-0.02	-0.07	-0.02	0.024	0.056	0.054	0.004	0	-0.01	0.021	0.008	0	0.006			-0.19	-0.18	-0.12	-0.11	-0.15	-0.2	-0.06	-0.09	-0.04	-0.08	-0.1	0.021	-0.24	-0.18	-0.2	-0.15	-0.17	-0.16	-0.22	-0.11	-0.17	-0.18
47.67	-0.05	0.055	0.002	0.019	-0.01	-0.11	0.004	-0.05	-0.04	-0.04	-0.07	-0.02	0.024	0.052	0.056	0.005	0	-0.01	0.019	0.009	0.001	0			-0.2	-0.22	-0.18	-0.13	-0.17	-0.18	-0.07	-0.1	-0.03	-0.07	-0.14	0.026	-0.27	-0.19	-0.2	-0.17	-0.15	-0.19	-0.29	-0.1	-0.22	-0.18
48	-0.06	0.052	0	0.01	-0.01	-0.11	0.004	-0.05	-0.04	-0.04	-0.07	-0.02	0.025	0.048	0.057	0.006	0	-0.01	0.019	0.005	0.01	0			-0.24	-0.16	-0.16	-0.16	-0.19	-0.24	-0.05	-0.1	-0.02	-0.03	-0.05	-0.01	-0.3	-0.14	-0.17	-0.15	-0.17	-0.23	-0.29	-0.12	-0.28	-0.18
48.33	-0.06	0.051	-0.01	0.007	-0.02	-0.11	0	-0.05	-0.04	-0.04	-0.07	-0.02	0.027	0.047	0.056	0.007	-0.01	-0.01	0.015	0	0.011	-0.01			-0.21	-0.18	-0.1	-0.16	-0.18	-0.25	0.015	-0.09	-0.08	-0.03	-0.11	-0.03	-0.32	-0.16	-0.14	-0.18	-0.22	-0.2	-0.35	-0.17	-0.23	-0.17
48.67	-0.06	0.048	-0.01	0.008	-0.02	-0.09	0	-0.05	-0.04	-0.05	-0.07	-0.02	0.033	0.05	0.052	0.008	0	0	0.01	0	0.009	-0.01			-0.18	-0.17	-0.13	-0.15	-0.17	-0.18	-0.02	-0.07	-0.1	-0.02	-0.14	-0.04	-0.3	-0.14	-0.13	-0.17	-0.21	-0.19	-0.33	-0.17	-0.15	-0.14
49	-0.07	0.041	-0.02	0.016	-0.02	-0.1	-0.01	-0.06	-0.04	-0.05	-0.07	-0.02	0.033	0.049	0.041	0.009	0.005	-0.01	0.008	0	0.008	-0.02			-0.16	-0.18	-0.1	-0.17	-0.14	-0.21	-0.04	-0.08	-0.03	0.031	-0.14	-0.03	-0.28	-0.17	-0.15	-0.18	-0.17	-0.21	-0.27	-0.17	-0.1	-0.13
49.33	-0.07	0.036	-0.02	0.021	-0.02	-0.09	-0.01	-0.06	-0.04	-0.05	-0.07	-0.02	0.032	0.052	0.044	0.01	0.012	-0.01	0.009	0.004	0.005	-0.02			-0.19	-0.16	-0.13	-0.17	-0.13	-0.18	0.039	-0.08	-0.02	0.053	-0.15	-0.04	-0.27	-0.17	-0.18	-0.18	-0.19	-0.31	-0.21	-0.1	-0.14	-0.15
49.67	-0.08	0.032	-0.03	0.01	-0.02	-0.07	-0.01	-0.07	-0.03	-0.06	-0.07	-0.02	0.029	0.053	0.038	0.008	0.011	-0.01	0.008	0.005	0.007	-0.02			-0.23	-0.11	-0.14	-0.16	-0.11	-0.19	-0.01	-0.11	-0.07	0.03	-0.13	-0.06	-0.29	-0.15	-0.19	-0.17	-0.19	-0.29	-0.18	-0.11	-0.18	-0.19
50	-0.08	0.025	-0.02	0.0009	-0.03	-0.07	-0.02	-0.07	-0.03	-0.04	-0.07	-0.02	0.026	0.053	0.041	0.007	0.013	-0.01	0.005	0.002	0.011	-0.01			-0.23	-0.13	-0.14	-0.15	-0.13	-0.2	-0.1	-0.13	-0.1	0.017	-0.14	-0.05	-0.28	-0.13	-0.19	-0.2	-0.16	-0.21	-0.17	-0.14	-0.18	-0.22
50.33	-0.09	0.018	-0.01	0.015	-0.03	-0.07	-0.01	-0.07	-0.03	-0.05	-0.07	-0.03	0.024	0.052	0.044	0.006	0.01	-0.01	0.008	0.002	0.01	-0.01			-0.19	-0.16	-0.13	-0.16	-0.13	-0.2	-0.06	-0.15	-0.11	0.055	-0.12	-0.05	-0.31	-0.13	-0.17	-0.22	-0.16	-0.22	-0.21	-0.14	-0.11	-0.25
50.67	-0.09	0.006	-0.01	0.005	-0.03	-0.07	-0.01	-0.07	-0.04	-0.04	-0.08	-0.03	0.022	0.051	0.049	0.004	0.011	-0.02	0.005	0.002	0.011	-0.01			-0.16	-0.15	-0.14	-0.12	-0.16	-0.22	-0.04	-0.14	-0.07	0.072	0.034	-0.06	-0.29	-0.13	-0.2	-0.22	-0.18	-0.25	-0.24	-0.16	-0.07	-0.23
51	-0.1	0	0.0005	0.011	-0.03	-0.07	-0.01	-0.07	-0.04	-0.03	-0.08	-0.03	0.018	0.048	0.055	0	0.01	-0.02	0.005	0.002	0.013	-0.02			-0.13	-0.19	-0.13	-0.08	-0.17	-0.17	0.043	-0.12	-0.03	0.099	0.053	-0.04	-0.28	-0.15	-0.21	-0.16	-0.19	-0.23	-0.26	-0.19	-0.09	-0.23
51.33	-0.1	0	0.002	0.009	-0.03	-0.07	-0.01	-0.07	-0.04	-0.04	-0.08	-0.04	0.016	0.043	0.052	-0.01	0.009	-0.02	0.005	0.001	0.011	-0.02			-0.17	-0.18	-0.09	-0.03	-0.17	-0.19	0.119	-0.06	0.0001	0.111	0.054	-0.02	-0.26	-0.12	-0.15	-0.15	-0.15	-0.22	-0.25	-0.19	-0.14	-0.25
51.67	-0.1	-0.01	0.005	0.0003	-0.03	-0.07	-0.01	-0.06	-0.04	-0.05	-0.08	-0.04	0.015	0.04	0.051	-0.01	0.008	-0.02	0.006	0.001	0.01	-0.02			-0.17	-0.16	-0.12	-0.04	-0.22	-0.16	0.13	-0.08	-0.01	0.106	0.009	-0.02	-0.24	-0.06	-0.16	-0.11	-0.17	-0.21	-0.28	-0.24	-0.17	-0.23
52	-0.09	-0.01	0.002	-0.02	-0.02	-0.07	-0.02	-0.06	-0.04	-0.05	-0.08	-0.04	0.013	0.041	0.051	-0.01	0.005	-0.02	0.007	0	0.005	-0.03			-0.18	-0.15	-0.18	-0.08	-0.24	-0.16	0.11	-0.1	-0.03	0.108	-0.02	0	-0.22	-0.04	-0.15	-0.12	-0.12	-0.23	-0.26	-0.26	-0.13	-0.18
52.33	-0.08	-0.01	-0.01	-0.03	-0.03	-0.08	-0.02	-0.06	-0.03	-0.05	-0.09	-0.04	0.008	0.043	0.048	-0.01	0.006	-0.02	0.009	0	0.003	-0.03			-0.14	-0.13	-0.19	-0.06	-0.24	-0.14	0.09	-0.09	0	0.085	-0.02	0.068	-0.23	-0.06	-0.15	-0.14	-0.09	-0.24	-0.27	-0.24	-0.13	-0.17
52.67	-0.08	-0.01	-0.01	-0.03	-0.03	-0.08	-0.02	-0.06	-0.03	-0.05	-0.09	-0.04	0.003	0.045	0.049	-0.01	0.001	-0.02	0.014	0.001	0.004	-0.03			-0.09	-0.1	-0.21	-0.07	-0.26	-0.13	0.048	-0.13	0.036	0.047	-0.04	0.101	-0.23	-0.1	-0.12	-0.15	-0.09	-0.23	-0.28	-0.23	-0.13	-0.18
53	-0.08	0.006	-0.01	-0.02	-0.03	-0.09	-0.02	-0.06	-0.03	-0.05	-0.09	-0.04	0.0002	0.046	0.048	-0.01	0.005	-0.01	0.019	0.003	0.002	-0.03			-0.15	-0.11	-0.1	-0.09	-0.3	-0.13	0.064	-0.17	0.034	0.052	-0.08	0.062	-0.2	-0.15	-0.15	-0.12	-0.13	-0.19	-0.27	-0.25	-0.18	-0.21
53.33	-0.07	0.011	-0.01	-0.04	-0.03	-0.09	-0.01	-0.06	-0.03	-0.03	-0.1	-0.03	0	0.047	0.047	-0.01	0.004	-0.02	0.022	0.005	0	-0.04			-0.13	-0.08	-0.12	-0.1	-0.24	-0.1	0.037	-0.18	8e-05	0.029	-0.1	0.096	-0.27	-0.11	-0.13	-0.14	-0.16	-0.15	-0.19	-0.23	-0.19	-0.17
53.67	-0.06	0.016	-0.01	-0.04	-0.03	-0.09	0	-0.06	-0.03	-0.04	-0.1	-0.03	0	0.046	0.048	-0.01	0.005	-0.02	0.022	0.0003	0	-0.03			-0.16	-0.06	-0.13	-0.11	-0.22	-0.1	0.14	-0.16	-0.04	0.055	-0.08	0.104	-0.29	-0.11	-0.11	-0.12	-0.15	-0.22	-0.15	-0.22	-0.18	-0.17
54	-0.06	0.022	-0.01	-0.05	-0.04	-0.09	0.0004	-0.06	-0.03	-0.04	-0.1	-0.02	0	0.045	0.051	-0.01	0.005	-0.02	0.021	0	0	-0.03			-0.14	-0.03	-0.15	-0.06	-0.23	-0.17	0.147	-0.2	-0.07	0.025	-0.04	0.075	-0.32	-0.18	-0.14	-0.18	-0.13	-0.25	-0.15	-0.24	-0.19	-0.18
54.33	-0.06	0.025	-0.01	-0.05	-0.05	-0.08	0.001	-0.06	-0.03	-0.04	-0.09	-0.01	0.0007	0.042	0.049	-0.01	0.007	-0.03	0.019	0	-0.01	-0.03			-0.12	-0.01	-0.09	-0.06	-0.2	-0.19	0.156	-0.18	-0.02	0.03	-0.01	0.04	-0.27	-0.12	-0.12	-0.2	-0.13	-0.29	-0.15	-0.29	-0.23	-0.14
54.67	-0.07	0.026	-0.01	-0.05	-0.06	-0.08	0.005	-0.06	-0.03	-0.04	-0.08	0	0	0.041	0.048	-0.01	0.009	-0.03	0.02	0	-0.01	-0.03			-0.11	-0.01	-0.13	-0.1	-0.23	-0.12	0.159	-0.14	-0.01	0.035	0.031	0.064	-0.26	-0.14	-0.14	-0.17	-0.1	-0.29	-0.17	-0.24	-0.24	-0.12
55	-0.07	0.027	-0.01	-0.04	-0.06	-0.07	0.006	-0.06	-0.03	-0.05	-0.07	0.003	-0.01	0.038	0.046	-0.01	0.007	-0.03	0.02	-0.01	-0.01	-0.02			-0.09	0.005	-0.13	-0.12	-0.23	-0.07	0.172	-0.09	-0.04	0.028	0.012	0.094	-0.26	-0.16	-0.16	-0.17	-0.08	-0.33	-0.17	-0.24	-0.23	-0.11
55.33	-0.07	0.031	-0.02	-0.04	-0.06	-0.07	0.012	-0.06	-0.04	-0.05	-0.06	0.009	-0.01	0.035	0.045	-0.01	0.003	-0.03	0.023	-0.01	-0.02	-0.02			-0.13	-0.02	-0.15	-0.15	-0.26	-0.13	0.136	-0.1	-0.01	-0.01	-0.06	0.096	-0.26	-0.1	-0.15	-0.17	-0.1	-0.32	-0.19	-0.27	-0.21	-0.12
55.67	-0.07	0.034	-0.02	-0.03	-0.05	-0.07	0.017	-0.06	-0.04	-0.05	-0.05	0.015	-0.01	0.035	0.045	0	0.0009	-0.03	0.024	-0.01	-0.02	-0.02			-0.12	-0.01	-0.17	-0.13	-0.24	-0.14	0.012	-0.06	-0.01	-0.06	-0.06	0.096	-0.22	-0.12	-0.2	-0.14	-0.07	-0.26	-0.28	-0.28	-0.25	-0.11
56	-0.07	0.035	-0.03	-0.02	-0.05	-0.08	0.024	-0.06	-0.04	-0.06	-0.05	0.016	-0.02	0.039	0.047	0.0004	0	-0.04	0.026	-0.02	-0.02	-0.02			-0.12	-0.03	-0.19	-0.13	-0.22	-0.1	0.0001	-0.04	-0.01	-0.04	-0.07	0.127	-0.21	-0.14	-0.17	-0.15	-0.13	-0.18	-0.25	-0.27	-0.2	-0.13
56.33	-0.06	0.038	-0.02	-0.03	-0.05	-0.08	0.02	-0.06	-0.04	-0.05	-0.05	0.015	-0.01	0.041	0.048	0.003	0	-0.04	0.03	-0.03	-0.03	-0.03			-0.11	0	-0.21	-0.14	-0.19	-0.12	0.027	-0.09	0.004	-0.05	-0.09	0.132	-0.21	-0.17	-0.17	-0.17	-0.14	-0.17	-0.2	-0.27	-0.18	-0.13
56.67	-0.06	0.041	-0.02	-0.05	-0.05	-0.09	0.022	-0.06	-0.04	-0.06	-0.04	0.011	-0.01	0.044	0.05	0.006	0.0002	-0.04	0.033	-0.03	-0.03	-0.03			-0.09	-0.02	-0.22	-0.15	-0.15	-0.15	0.06	-0.12	-0.01	-0.05	-0.13	0.129	-0.19	-0.21	-0.15	-0.17	-0.11	-0.24	-0.22	-0.2	-0.15	-0.17
57	-0.07	0.043	-0.02	-0.04	-0.04	-0.09	0.018	-0.06	-0.04	-0.06	-0.04	0.005	-0.01	0.042	0.051	0.006	0	-0.04	0.034	-0.03	-0.03	-0.03			-0.1	-0.03	-0.24	-0.13	-0.16	-0.2	0.05	-0.18	-0.03	0.031	-0.15	0.128	-0.21	-0.18	-0.16	-0.15	-0.11	-0.3	-0.18	-0.2	-0.14	-0.18
57.33	-0.06	0.048	-0.02	-0.05	-0.05	-0.1	0.012	-0.06	-0.04	-0.07	-0.05	0.004	-0.02	0.044	0.052	0.005	0	-0.03	0.034	-0.03	-0.03	-0.03			-0.14	-0.1	-0.21	-0.16	-0.13	-0.18	0.023	-0.16	-0.02	0	-0.15	0.144	-0.22	-0.2	-0.17	-0.17	-0.12	-0.21	-0.14	-0.24	-0.19	-0.16
57.67	-0.06	0.056	-0.02	-0.04	-0.06	-0.1	2e-05	-0.06	-0.05	-0.07	-0.05	0	-0.02	0.044	0.05	0.004	0	-0.03	0.034	-0.03	-0.03	-0.03			-0.1	-0.05	-0.19	-0.17	-0.16	-0.2	0.007	-0.17	0.021	0	-0.08	0.11	-0.24	-0.18	-0.14	-0.17	-0.15	-0.19	-0.14	-0.28	-0.21	-0.14
58	-0.06	0.059	-0.02	-0.04	-0.06	-0.1	-0.01	-0.07	-0.05	-0.07	-0.05	-0.01	-0.02	0.044	0.048	0	-0.01	-0.04	0.033	-0.03	-0.03	-0.03			-0.1	-0.01	-0.21	-0.16	-0.15	-0.14	0.015	-0.19	0.075	0.005	-0.08	0.112	-0.25	-0.23	-0.13	-0.17	-0.17	-0.2	-0.15	-0.26	-0.22	-0.14
58.33	-0.06	0.064	-0.03	-0.04	-0.06	-0.12	0	-0.08	-0.05	-0.07	-0.05	-0.02	-0.01	0.043	0.046	0	-0.01	-0.04	0.034	-0.03	-0.03	-0.03			-0.13	-0.03	-0.21	-0.17	-0.13	-0.13	0.05	-0.17	0.13	0.009	-0.08	0.144	-0.24	-0.22	-0.14	-0.21	-0.11	-0.21	-0.18	-0.28	-0.18	-0.16
58.67	-0.07	0.068	-0.02	-0.05	-0.07	-0.13	0.007	-0.08	-0.04	-0.07	-0.05	-0.02	-0.01	0.04	0.045	0	-0.01	-0.04	0.033	-0.03	-0.02	-0.03			-0.14	0.002	-0.16	-0.17	-0.17	-0.14	0.076	-0.19	0.096	0	-0.16	0.136	-0.24	-0.24	-0.16	-0.23	-0.13	-0.18	-0.16	-0.25	-0.17	-0.16
59	-0.07	0.072	-0.01	-0.05	-0.07	-0.15	0.019	-0.08	-0.04	-0.07	-0.06	-0.01	-0.01	0.03	0.046	0	-0.01	-0.04	0.034	-0.03	-0.02	-0.03			-0.12	-0.03	-0.13	-0.17	-0.2	-0.15	0.074	-0.18	0.013	-0.05	-0.2	0.103	-0.24	-0.25	-0.17	-0.24	-0.13	-0.2	-0.19	-0.27	-0.16	-0.17
59.33	-0.07	0.07	-0.02	-0.05	-0.07	-0.16	0.022	-0.08	-0.04	-0.07	-0.07	0	-0.01	0.027	0.047	-0.01	-0.02	-0.04	0.037	-0.02	-0.02	-0.03			-0.09	-0.04	-0.13	-0.2	-0.22	-0.14	0.048	-0.17	-0.02	-0.08	-0.2	0.135	-0.26	-0.2	-0.13	-0.19	-0.1	-0.25	-0.23	-0.28	-0.17	-0.19
59.67	-0.07	0.071	-0.02	-0.04	-0.08	-0.16	0.018	-0.08	-0.04	-0.07	-0.08	0	-0.01	0.027	0.051	-0.01	-0.01	-0.04	0.038	-0.02	-0.02	-0.03			-0.05	-0.01	-0.14	-0.07	-0.01	-0.08	-0.13	0.03	-0.07	-0.05	0	0.067
