# Supplementary material for: Hierarchical architecture of dopaminergic circuits enables second-order conditioning in Drosophila
Source: eLife. 2023 Jan 24;12:e79042. doi: 10.7554/eLife.79042 (PMC9937650; doi:10.7554/eLife.79042)
Supplement: Figure 7—source data 1. [file elife-79042-fig7-data1.xlsx]

## Sheet: Figure7A
SS67221 x CS	SS67221 x TNT	SS45234 x CS	SS45234x TNT	Empty x TNT
0.651578	0.47306	0.504627	0.195092	0.476516
0.70253	0.317316	0.342048	0.386642	0.554493
0.611099	0.390151	0.403886	0.207001	0.507806
0.467914	0.239255	0.696185	0.083708	0.353047
0.417044	0.342769	0.672602	0.5252	0.639999
0.386313	0.410056	0.60088	0.53222	0.499899
0.555917	0.331792	0.747024	0.38062	0.401272
0.481162	0.283791	0.642324	0.396427	0.645494
		0.744524	0.202583	0.523468
			0.35218	0.532813

## Sheet: Figure7B
SS67221 x CS	SS67221 x TNT	Empty x TNT
0.694741	0.757245	0.811518
0.639278	0.893534	0.821138
0.82395	0.715206	0.71466
0.887442	0.442972	0.667485
0.789878	0.892645	0.967337
0.766441	0.772218	0.77402
0.697533	0.962073	0.89141
0.652955	0.902608	0.914606
0.933062	0.897842
0.823733	0.942411

## Sheet: Figure7C
SS67221 x CS	SS67221 x TNT	Empty x TNT
0.596357	0.681537	0.729247
0.363019	0.622432	0.778626
0.659134	0.798986	0.55034
0.660071	0.733078	0.641494
0.699831	0.745587	0.526694
0.545385	0.621339	0.574383
0.521063	0.517686	0.525153
0.375998	0.624863	0.558766
