# Supplementary material for: Hierarchical architecture of dopaminergic circuits enables second-order conditioning in Drosophila
Source: eLife. 2023 Jan 24;12:e79042. doi: 10.7554/eLife.79042 (PMC9937650; doi:10.7554/eLife.79042)
Supplement: Figure 8—source data 1. [file elife-79042-fig8-data1.xlsx]

## Sheet: Figure8B
	test	MB043C																MB109B+MB315C																MB109B
pre-test1	1	-0.0956426	-0.141353	0.0226529	-0.222919	-0.0291518	0.052592	0.0897462	-0.0884154	-0.0599609	-0.284158							-0.244169	-0.137917	-0.0632246	0.0349048	-0.203675	-0.0179135	-0.198625	0.0501902									-0.0511065	-0.0892863	0.0213821	-0.0614635	0.125642	0.0244826	-0.197044	0.0271165	-0.0813962	-0.0203215	0.00689625	-0.11461
pre-test2	2	0.102953	-0.116591	-0.0589133	0.104878	-0.223024	0.00293117	-0.177383	-0.0489676	-0.0753753	0.123427							-0.00378028	0.059529	-0.103359	-0.060387	-0.332986	-0.17274	-0.0372156	0.193428									-0.0720273	-0.184777	0.121557	0.133907	-0.290221	0.089967	0.00724319	-0.0447712	-0.0425314	-0.0605393	-0.0857374	0.0047754
train 1x10s	3	0.3095	0.163355	0.238098	0.108428	0.196246	0.117898	-0.009486	0.0809187	0.293927	0.00090434							0.497824	0.37718	0.627968	0.623184	0.358675	0.430511	0.171671	0.421401									0.156457	-0.0147447	0.173166	0.269688	0.119025	0.146339	0.272534	0.242031	0.233351	0.156251	0.174327	0.348581
train 1x30s	4	0.769335	0.613878	0.503954	0.63961	0.52192	0.528555	0.567588	0.787981	0.667152	0.4795							0.752021	0.812637	0.853058	0.885894	0.661743	0.571144	0.694931	0.556794									0.121701	0.484494	0.31088	0.318099	0.195492	0.00917115	0.417081	0.165252	0.344547	0.279995	0.326499	0.303242
train 1x 1min	5	0.840447	0.795396	0.682953	0.88601	0.777192	0.761181	0.544151	0.687406	0.788807	0.85211							0.72855	0.752065	0.862511	0.926271	0.90641	0.568505	0.73946	0.919064									0.290319	0.485459	0.434529	0.309371	0.428772	0.12084	0.479762	0.421646	0.478072	0.253946	0.227956	0.152671
train 1x 1min	6	0.871093	0.67836	0.725065	0.896272	0.856351	0.685485	0.680944	0.948188	0.823431	0.809076							0.746253	0.805187	0.849011	0.860836	0.810514	0.655751	0.849181	0.802153									0.382639	0.45201	0.319376	0.407116	0.327986	0.377873	0.354002	0.505377	0.472308	0.54797	0.135251	0.124994
train 1x 1min	7	0.886783	0.729381	0.730328	0.893582	0.745049	0.643902	0.689465	0.937256	0.720856	0.882065							0.842462	0.887605	0.864778	0.878873	0.723127	0.504423	0.760709	0.853072									0.510581	0.328933	0.482756	0.42316	0.360896	0.167408	0.475023	0.322848	0.300041	0.424443	0.36955	0.203628
test_02	8	0.812486	0.521243	0.77637	0.890331	0.531596	0.566292	0.538254	0.856766	0.755806	0.845452							0.726289	0.505012	0.835868	0.353653	0.595745	0.631813	0.763304	0.844703									0.337733	0.266368	0.284198	0.0739133	0.0541699	0.258899	0.185063	0.410042	0.265647	0.341225	0.180609	0.171085
test_03	9	0.831512	0.695701	0.65777	0.880834	0.591118	0.589322	0.596006	0.861838	0.740059	0.82236							0.603858	0.721193	0.782098	0.702413	0.651906	0.40291	0.81407	0.873108									0.0236451	0.181082	0.2012	0.268728	0.123114	0.0741953	0.108321	0.382456	0.0986602	0.240331	-0.0887885	0.0279613
test_04	10	0.824895	0.618999	0.668783	0.816633	0.697217	0.69205	0.492777	0.827883	0.758487	0.580087							0.775234	0.660121	0.643809	0.468732	0.400766	0.709023	0.630606	0.731756									0.265179	0.461014	0.30867	0.0649399	-0.16243	0.158132	-0.0298387	0.354758	0.192812	0.139167	0.199388	0.119227
test_05	11	0.671849	0.704442	0.510385	0.864997	0.438153	0.542333	0.520509	0.806593	0.474586	0.820427							0.488864	0.607665	0.390806	0.858456	0.559313	0.188519	0.68009	0.789536									-0.0135941	0.283226	0.0980506	0.337469	0.144144	-0.0118956	0.169034	0.102451	0.24757	0.320273	0.0932821	-0.0931902
test_06	12	0.737149	0.376116	0.287514	0.805906	0.470931	0.425334	0.320464	0.765251	0.712618	0.484792							0.49949	0.481017	0.511033	0.658863	0.377958	0.536324	0.688333	0.524001									0.148763	0.121588	0.348463	-0.245453	0.0898379	0.417267	0.0253373	0.336911	0.208286	0.232809	0.134271	0.188588
test_07	13	0.611756	0.345937	0.421225	0.834778	0.404722	0.412903	0.376553	0.905706	0.379633	0.919673							0.274821	0.601922	0.376562	0.718777	0.488993	0.269321	0.641832	0.675767									0.0514047	0.121984	0.2307	0.292672	0.151303	-0.0496947	0.30324	-0.040921	0.0286457	0.47914	0.11044	0.059752
test_08	14	0.648582	0.30722	0.393826	0.761043	0.326179	0.286962	0.291298	0.442576	0.533159	0.360051							0.444549	0.296346	0.501812	0.624454	0.483155	0.30568	0.599406	0.447868									0.161333	0.12902	0.344446	0.217022	-0.0682987	0.357909	0.183718	0.381985	0.202495	-0.0784061	0.304284	0.269237
test_09	15	0.46448	0.522164	0.33621	0.87407	0.24293	0.21365	0.394763	0.541269	0.337946	0.704473							0.33872	0.58487	0.476339	0.444424	0.417187	0.282374	0.461902	0.706601									0.0072292	0.233292	0.0436962	0.317088	0.182778	-0.0790719	0.6142	0.0701934	0.056342	0.283563	0.0226755	0.0436826
test_10	16	0.774801	0.242693	0.0849231	0.656007	0.3894	0.257067	0.182668	0.4596	0.486599	0.648139							0.357634	0.429838	0.151628	0.343325	0.366861	0.570661	0.51917	0.354629									0.228385	0.227501	0.259735	0.0680698	-0.0568475	0.479881	0.11953	0.118443	0.222243	-0.101741	0.171918	0.102235
test_11	17	0.483924	0.331074	0.296851	0.569964	0.203372	0.160071	0.224076	0.672939	0.407418	0.592347							0.629028	0.429531	0.443463	0.415318	0.0190904	0.317752	0.514435	0.561404									0.18304	0.166226	0.0878394	0.170771	0.0889196	-0.0542593	0.364221	0.0561658	0.068648	0.137776	-0.0494843	0.20153
test_12	18	0.556997	0.220475	0.208074	0.601994	0.305148	0.141168	0.167146	0.40953	0.440545	0.394208							0.216985	0.428713	0.448026	0.485556	-0.0014722	0.19571	0.27104	0.219									0.150507	0.0534625	0.124977	-0.0996869	0.0845357	0.257585	0.301062	0.105756	0.21541	0.0747126	0.42082	0.0136546
train 1x10s	19	0.306686	0.0801103	0.111409	0.53237	-0.0914013	0.025274	-0.0049903	0.288334	0.0137675	0.541912							-0.106709	-0.148097	-0.281398	-0.0824363	-0.152292	-0.271737	0.387113	0.214533									-0.217284	-0.223128	0.0366305	0.0595465	0.144921	-0.185756	-0.174201	-0.0060478	-0.138915	0.0588565	0.16315	-0.162069
train 1x30s	20	-0.391361	-0.257191	0.0266619	-0.126717	-0.277364	-0.308401	-0.136156	-0.0848256	-0.316976	0.143784							-0.641198	-0.603131	-0.52018	-0.517885	-0.404584	-0.420264	-0.0717465	0.0875538									-0.219465	-0.535731	-0.202802	-0.14687	-0.166776	-0.31315	-0.23717	-0.265697	-0.30611	-0.0584917	0.196463	-0.0217227
train 1x 1min	21	-0.507599	-0.313702	-0.427656	-0.519759	-0.300313	-0.407387	-0.190382	-0.117324	-0.344129	0.0834385							-0.394051	-0.449291	-0.682023	-0.662254	-0.536341	-0.573786	-0.521329	-0.185778									-0.40935	-0.477265	-0.440952	-0.369503	-0.279666	-0.470216	-0.15442	-0.375321	-0.26342	-0.207474	0.0576053	-0.315849
train 1x 1min	22	-0.607876	-0.362686	-0.499219	-0.310984	-0.308908	-0.556061	-0.103066	-0.494816	-0.36253	-0.006748							-0.671081	-0.489149	-0.718438	-0.384407	-0.785262	-0.435965	-0.150973	-0.334824									-0.476493	-0.662157	-0.536021	-0.295124	-0.0648259	-0.697289	-0.14512	-0.495793	-0.356295	-0.364885	0.0158158	-0.213399
train 1x 1min	23	-0.521246	-0.224123	-0.560865	-0.556536	-0.0196848	-0.420079	-0.199715	-0.678261	-0.173564	-0.57403							-0.500617	-0.441905	-0.771103	-0.426716	-0.752925	-0.488116	-0.417163	-0.332293									-0.530896	-0.652782	-0.303429	-0.337429	-0.412508	-0.283118	-0.364805	-0.354916	-0.31721	-0.395458	-0.181443	0.12529
test_02	24	-0.577121	-0.133172	-0.377044	-0.323956	-0.363582	-0.536599	-0.465246	-0.332228	-0.428237	-0.456326							-0.515946	-0.532888	-0.464016	-0.605019	-0.332822	-0.0930039	-0.538659	-0.443451									-0.443592	-0.449026	-0.114812	-0.513665	-0.416493	-0.181096	-0.228817	-0.434114	-0.219646	0.184676	-0.0360571	-0.0961479
test_03	25	-0.440547	-0.128232	-0.303257	-0.372086	-0.295681	-0.330936	-0.19632	-0.478275	-0.0947185	-0.312262							-0.480718	-0.404239	-0.60678	-0.49737	-0.67847	-0.528797	-0.518808	-0.285153									-0.296873	-0.369432	-0.195612	-0.299025	-0.0166023	-0.272597	-0.129401	-0.0842372	-0.507483	-0.431544	-0.587576	-0.137645
test_04	26	-0.331097	-0.158238	-0.317133	-0.318689	-0.101557	-0.465516	-0.275432	-0.39933	-0.290899	-0.370918							-0.473239	-0.170905	-0.409997	-0.469209	-0.294155	-0.144402	-0.397414	-0.269942									-0.0061628	-0.292319	-0.208612	-0.171626	-0.382025	-0.0041821	-0.312564	-0.273806	-0.0561403	-0.0081891	0.191686	-0.117623
test_05	27	-0.22448	-0.0560011	-0.355573	-0.188076	-0.0328585	-0.335998	-0.0654773	-0.429768	-0.369302	-0.427256							-0.388595	-0.36897	-0.322721	-0.425399	-0.505075	-0.391221	-0.267194	-0.0322149									-0.175398	-0.202093	-0.152284	0.00365021	0.013057	-0.332271	-0.15273	-0.209332	-0.217583	-0.423512	-0.0200092	-0.385787
test_06	28	-0.168375	-0.142755	-0.163908	-0.0909946	-0.338661	-0.409738	-0.147922	-0.183474	-0.29641	-0.0999007							-0.333142	-0.486687	-0.496927	-0.113176	-0.350885	-0.315771	-0.328259	-0.430897									-0.152743	-0.0124699	-0.0492641	-0.387261	-0.0836486	-0.0250114	-0.253991	-0.239697	0.164236	0.0858703	-0.0946565	0.153588
test_07	29	-0.124323	-0.128444	0.0321802	-0.291108	0.125769	-0.214485	-0.0739599	-0.296128	-0.210152	-0.163541							-0.424177	-0.162144	-0.221198	-0.270244	-0.377431	-0.308093	-0.0914215	-0.0675459									-0.207492	-0.0454292	-0.305092	-0.0628364	0.341264	-0.251801	-0.0406253	-0.161777	-0.160736	-0.0398575	0.346897	-0.0964344
test_08	30	0.0121074	-0.0473559	-0.220343	-0.0293873	-0.236467	-0.329416	-0.0359207	-0.199568	0.00677779	-0.417339							-0.37029	-0.34029	0.0318113	-0.345221	-0.216951	-0.0625133	-0.353707	-0.0902327									-0.0567908	-0.215707	0.0493699	-0.346286	-0.269435	0.0424468	-0.0523147	-0.0985993	0.0954348	-0.0623449	-0.17174	-0.197337
test_09	31	0.0703913	-0.006808	-0.0178657	-0.171122	-0.0992282	0.0267993	-0.0533223	-0.166382	-0.209394	-0.144081							-0.312787	-0.101866	-0.0616382	-0.449262	-0.350746	-0.517382	-0.232827	-0.0138193									-0.335142	-0.0169689	0.0452296	0.133329	0.0617005	-0.326504	-0.100512	-0.285185	-0.177377	-0.167192	-0.27033	-0.136106
test_10	32	-0.0602968	-0.091768	-0.265207	-0.330215	-0.237422	-0.051283	-0.0586007	-0.246882	0.00794328	-0.295775							-0.375347	-0.20177	-0.27433	-0.550162	-0.164642	-0.166696	-0.176784	-0.25267									-0.000944385	-0.287006	-0.0679379	-0.0658938	-0.364614	0.10174	-0.148261	-0.256199	-0.128736	0.0758445	-0.211482	-0.0606216
test_11	33	-0.128643	0.171432	-0.0196892	0.0863037	0.224836	-0.0516419	0.329973	-0.105138	-0.190342	-0.100072							-0.0807112	-0.0856593	-0.272816	0.0683568	-0.157392	-0.158286	-0.280865	0.106992									-0.124683	-0.0082508	-0.0563381	-0.220342	-0.0715497	-0.105525	-0.115431	-0.0107135	-0.0283333	-0.269237	0.176394	-0.0791377
test_12	34	-0.00107618	-0.0862966	0.0620643	0.0760448	-0.0244006	-0.148602	-0.282965	-0.225854	-0.215019	-0.266845							-0.239119	-0.361426	-0.283093	-0.355501	-0.216029	0.11197	-0.139346	-0.256683									-0.0840579	-0.272164	0.130025	0.0666268	-0.231767	0.0405026	-0.288154	-0.0144925	0.0526684	0.0405024	0.250097	0.0083077
train 1x10s	35	0.222119	0.253617	0.077345	0.417819	0.047682	0.145206	0.21813	0.180169	0.136605	0.145095							0.394879	0.188145	0.195691	0.25506	0.201354	0.0449187	0.30464	0.239583									0.148578	-0.0147274	-0.164998	0.0420981	0.274432	0.228786	0.0484917	0.0388026	-0.145902	-0.0232686	-0.223875	-0.0922062
train 1x30s	36	0.331902	0.44777	0.435738	0.618528	0.293947	0.376092	0.26087	0.301168	0.305672	0.258059							0.312573	0.374802	0.615676	0.490033	0.235796	-0.0558974	0.411339	0.34528									0.398021	0.261852	0.317084	0.248069	0.267381	-0.178328	0.184601	0.268624	0.0436265	-0.150236	-0.0290547	-0.0082941
train 1x 1min	37	0.426415	0.500292	0.342057	0.610685	0.295675	0.429649	0.445699	0.574831	0.31211	0.764627							0.678386	0.714302	0.417967	0.552563	0.318635	0.416601	0.501867	0.609003									0.370232	0.345914	0.203105	0.229027	0.256077	0.144698	0.319294	0.428044	0.161265	0.406402	-0.163969	0.252298
train 1x 1min	38	0.415957	0.459454	0.593004	0.618283	0.267118	0.568872	0.434605	0.43629	0.443361	0.697576							0.607949	0.654539	0.510635	0.654782	0.204034	0.429449	0.42206	0.417642									0.593561	0.37309	0.298044	0.424907	0.336833	0.116036	0.310256	0.39439	0.168709	0.388433	-0.171221	0.0587523
train 1x 1min	39	0.411315	0.424469	0.300835	0.599635	0.125547	0.223863	0.380427	0.746324	0.424269	0.683445							0.737578	0.860703	0.72525	0.757864	0.241773	0.0692928	-0.198625	0.0501902									0.472671	0.337666	0.175188	0.342875	0.27755	0.0106937	0.416184	0.376621	0.240512	0.23008	-0.28336	0.0910597
forgetting 1x1min	40	0.387487	0.580072	0.308939	0.477548	0.0102739	0.371488	0.0808484	0.50949	0.254546	0.312635							0.369246	0.187746	0.170238	0.337491	0.26168	4.0412e-05	0.0372156	-0.193428									0.211506	0.342204	0.182213	0.238125	0.183524	0.189097	0.0104131	0.121455	0.271361	0.272035	-0.128862	-0.0531638
forgetting 1x1min	41	0.340046	0.388501	0.218444	0.355869	0.113547	0.12371	0.355972	0.509922	0.271341	0.576303							0.164715	0.382928	0.303974	0.282347	0.223994	0.0234113											0.170417	0.221012	0.14066	0.358821	0.28327	0.0613728	-0.0059032	0.118129	-0.0250815	0.0869977	0.1537	0.277229
forgetting 1x1min	42	0.119971	0.429437	0.0514273	0.0891539	0.146886	0.235599	0.145559	0.160524	0.370675	0.204479							0.248661	0.12261	0.17808	-0.143279	0.172406	0.0317117											0.129695	0.0913896	0.197096	0.302805	0.251573	0.0201527	0.129082	-0.0189641	0.309635	0.264451	0.13032	0.0346999
[truncated: 66 more columns]
