# Supplementary material for: Hierarchical architecture of dopaminergic circuits enables second-order conditioning in Drosophila
Source: eLife journal article supplement (doi:10.7554/elife.79042), 2023-01-24
Supplement: supp [file elife-79042-supp-v1.zip]

| DAN cell type                           | PAM01_a | PAM01_b | PAM15_a | PAM15_b | PAM02 | PAM03  | PAM04_a | PAM04_b | PAM05 | PAM06_a | PAM06_b | PAM07   | PAM08_a | PAM08_b | PAM08_c | PAM08_d | PAM09 | PAM10 | PAM11 | PAM12 | PAM13 | PAM14 | PPL101 | PPL102 | PPL103 | PPL104 | PPL105 | PPL106 | PPL201 | PPL202 |
|-----------------------------------------|---------|---------|---------|---------|-------|--------|---------|---------|-------|---------|---------|---------|---------|---------|---------|---------|-------|-------|-------|-------|-------|-------|--------|--------|--------|--------|--------|--------|--------|--------|
| MB compartments                         | y5      | y5      | y5B'2a  | y5B'2a  | B'2a  | B2B'2a | B2      | B2      | B'2p  | B'2m    | B'2m    | y4<y1y2 | y4      | y4      | y4      | y4      | B1ped | B1    | a1    | y3    | B'1ap | B'1m  | y1pedc | y1     | y2a'1  | a'3    | a'2a2  | a3     | calyx  | calyx  |
| Total number of connectiosn from SMP108 | 14      | 19      | 12      | 4       | 166   | 4      | 16      | 9       | 49    | 153     | 7       | 5       | 63      | 1       | 37      | 10      | 27    | 17    | 11    | 1     | 5     | 3     | 2      | 5      | 3      | 2      | 1      | 4      | 11     | 5      |
| number of cells / DAN cell type         | 12      | 7       | 1       | 2       | 8     | 4      | 15      | 1       | 10    | 11      | 4       | 5       | 8       | 5       | 4       | 1       | 6     | 6     | 7     | 11    | 7     | 8     | 1      | 1      | 1      | 1      | 1      | 1      | 1      | 1      |
| number of connection from SMP108 / cell | 1.2     | 2.7     | 12.0    | 2.0     | 20.8  | 1.0    | 1.1     | 9.0     | 4.9   | 13.9    | 1.8     | 1.0     | 7.9     | 0.2     | 9.3     | 10.0    | 4.5   | 2.8   | 1.6   | 0.1   | 0.7   | 0.4   | 2.0    | 5.0    | 3.0    | 2.0    | 1.0    | 4.0    | 11.0   | 5.0    |

Figure 4-figure supplement 2
