# Supplementary figures and images for: Hierarchical architecture of dopaminergic circuits enables second-order conditioning in Drosophila
Source: eLife journal article supplement (doi:10.7554/elife.79042), 2023-01-24

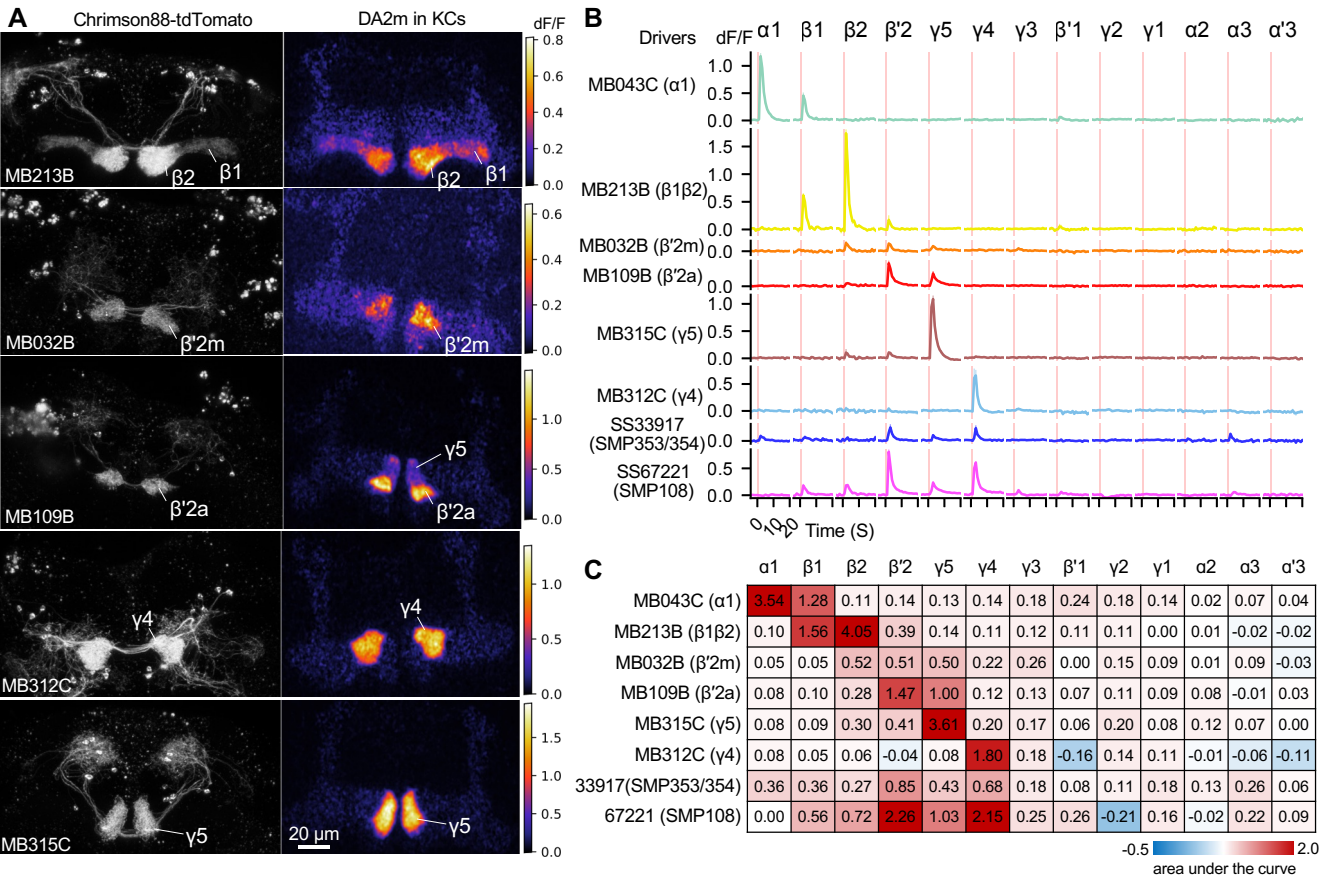

**Figure 6-figure supplement 1**

Supplement: supp [file elife-79042-supp-v1.zip]

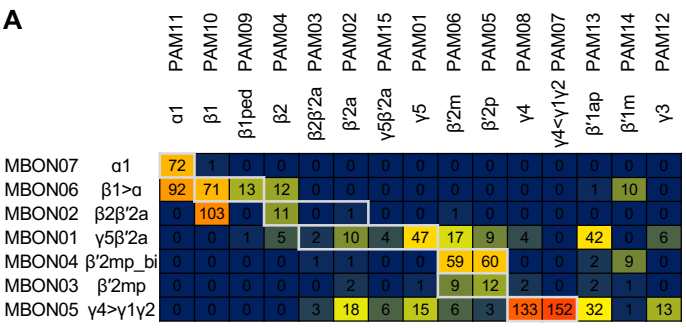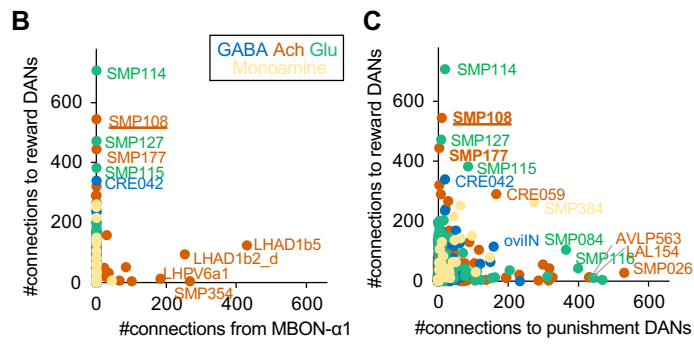

Figure 4-figure supplement 1

Supplement: supp [file elife-79042-supp-v1.zip]

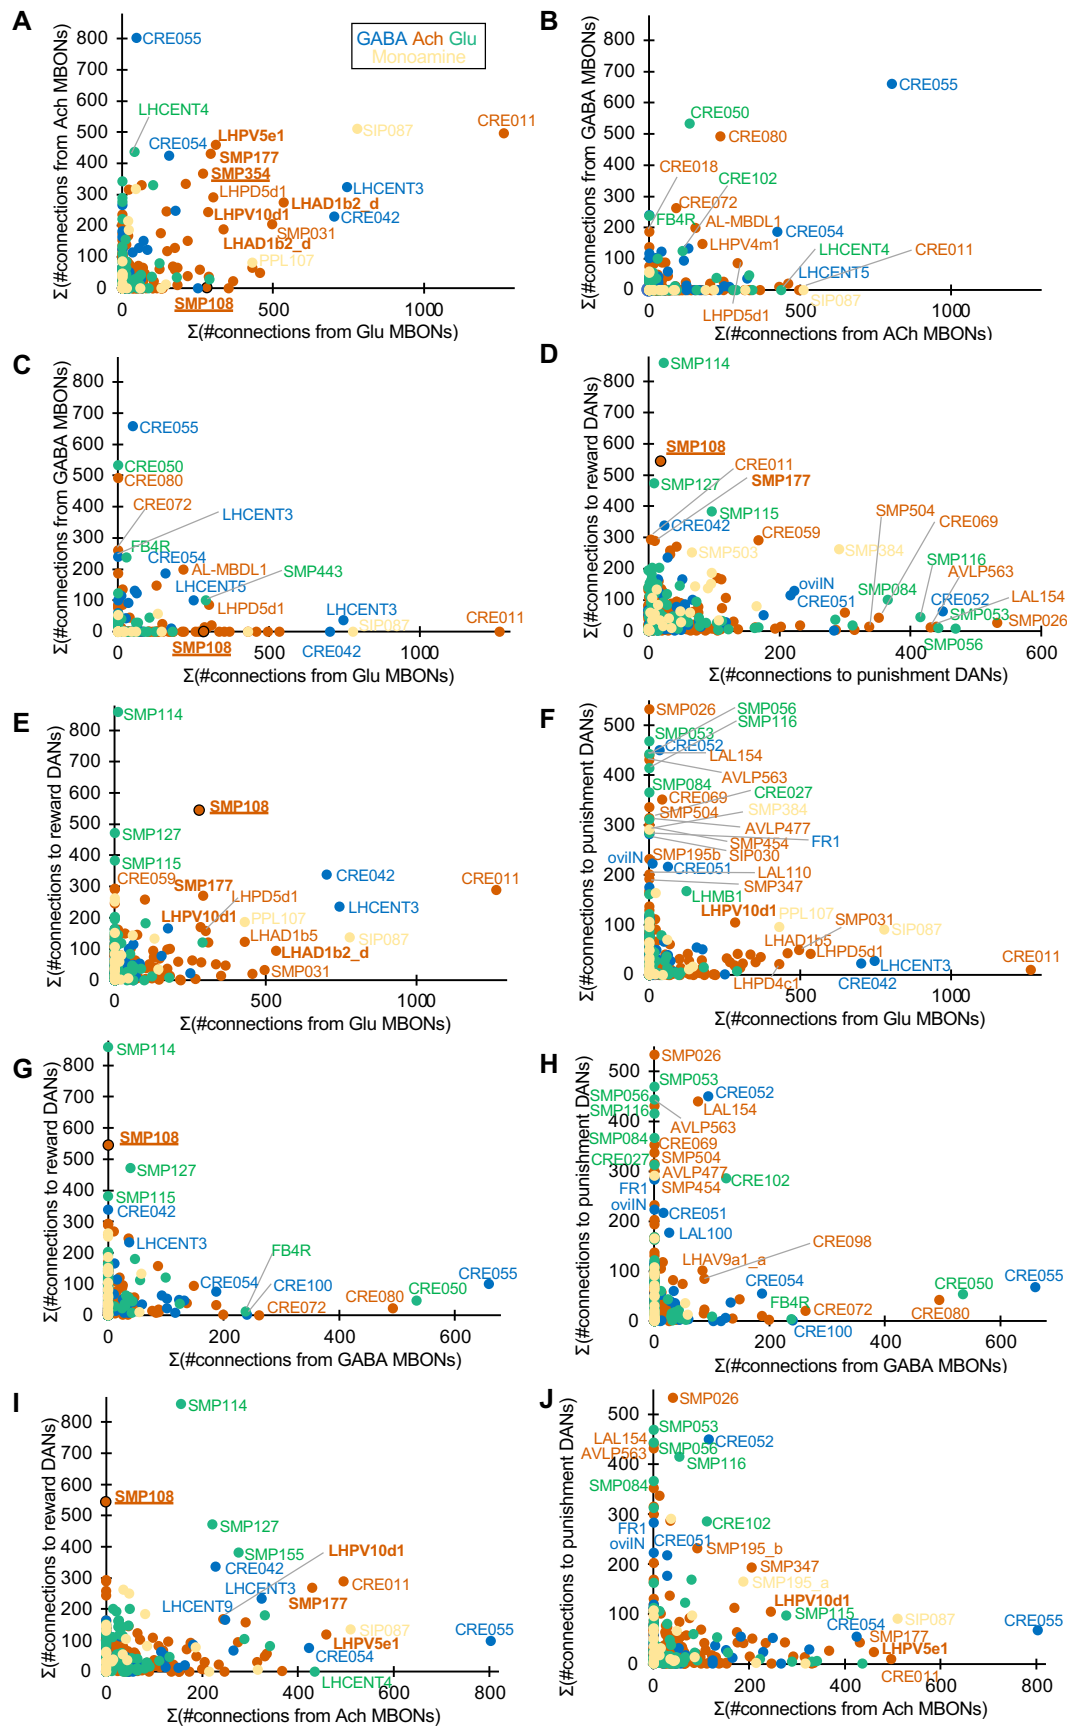

**Figure 4-figure supplement 3**

Supplement: supp [file elife-79042-supp-v1.zip]

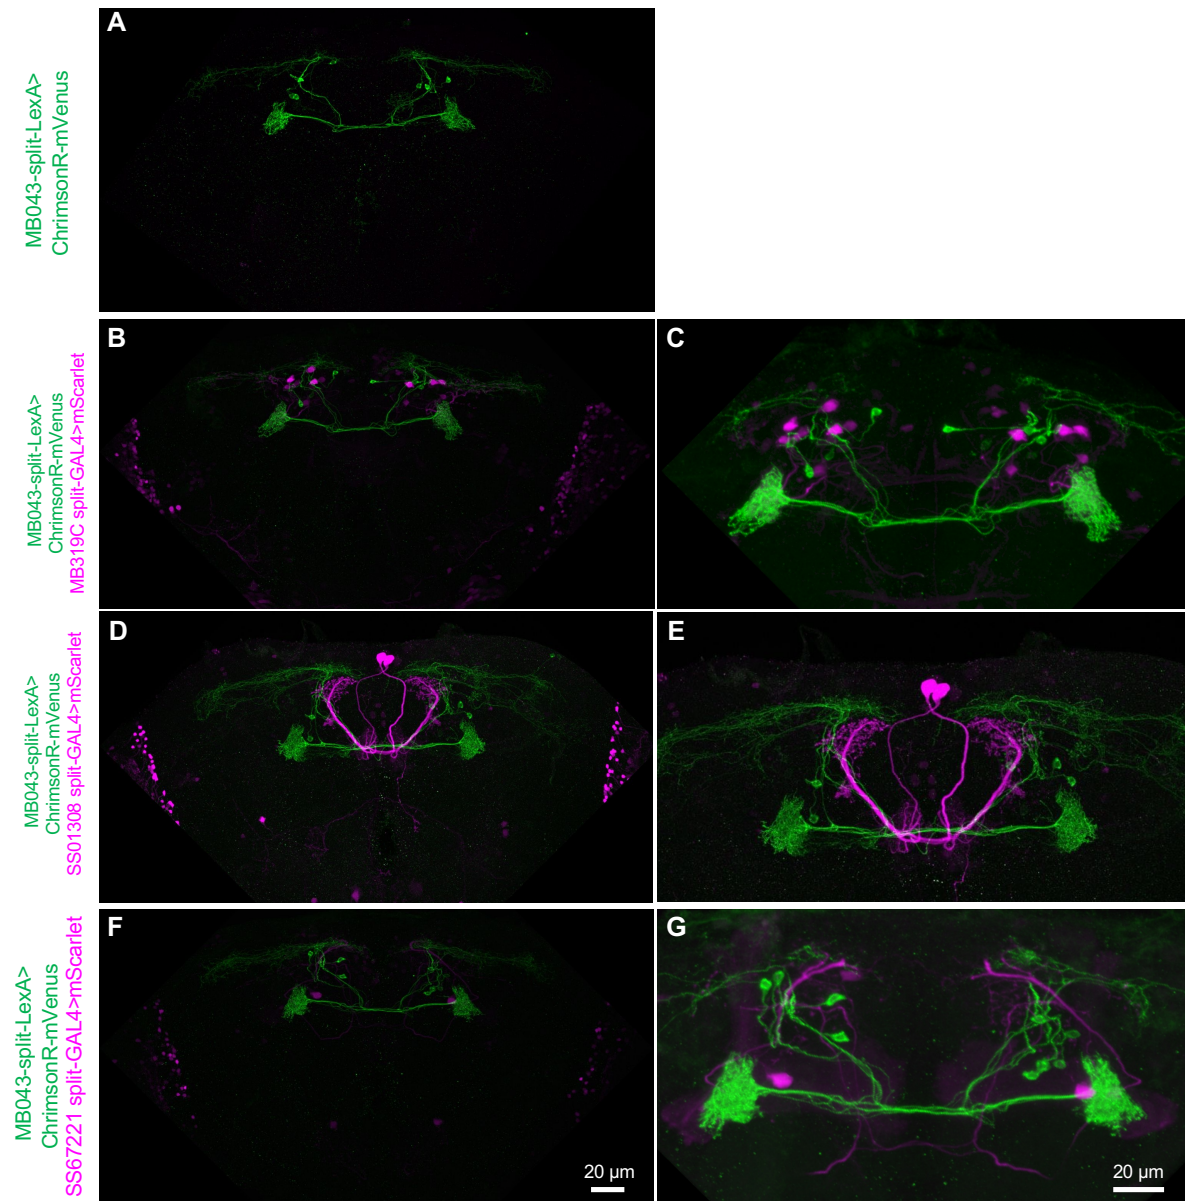

**Figure 3-figure supplement 1**

Supplement: supp [file elife-79042-supp-v1.zip]

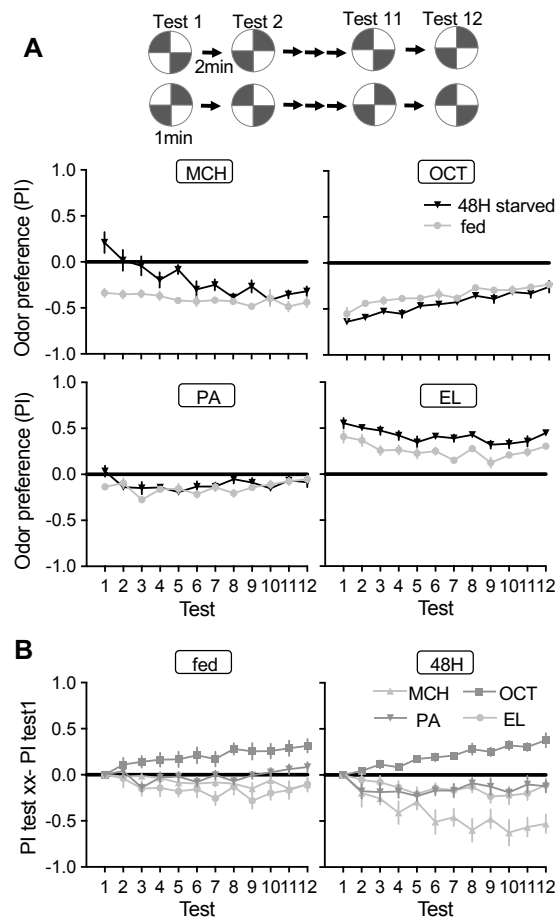

**Figure 1-figure supplement 1**

Supplement: supp [file elife-79042-supp-v1.zip]

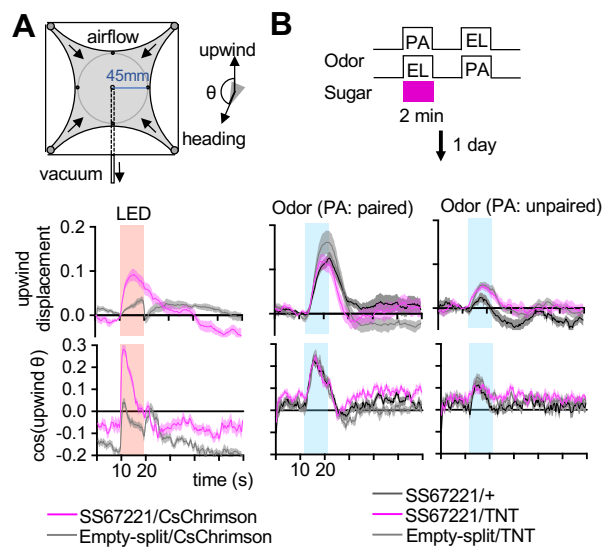

**Figure 7-figure supplement 1**

Supplement: supp [file elife-79042-supp-v1.zip]

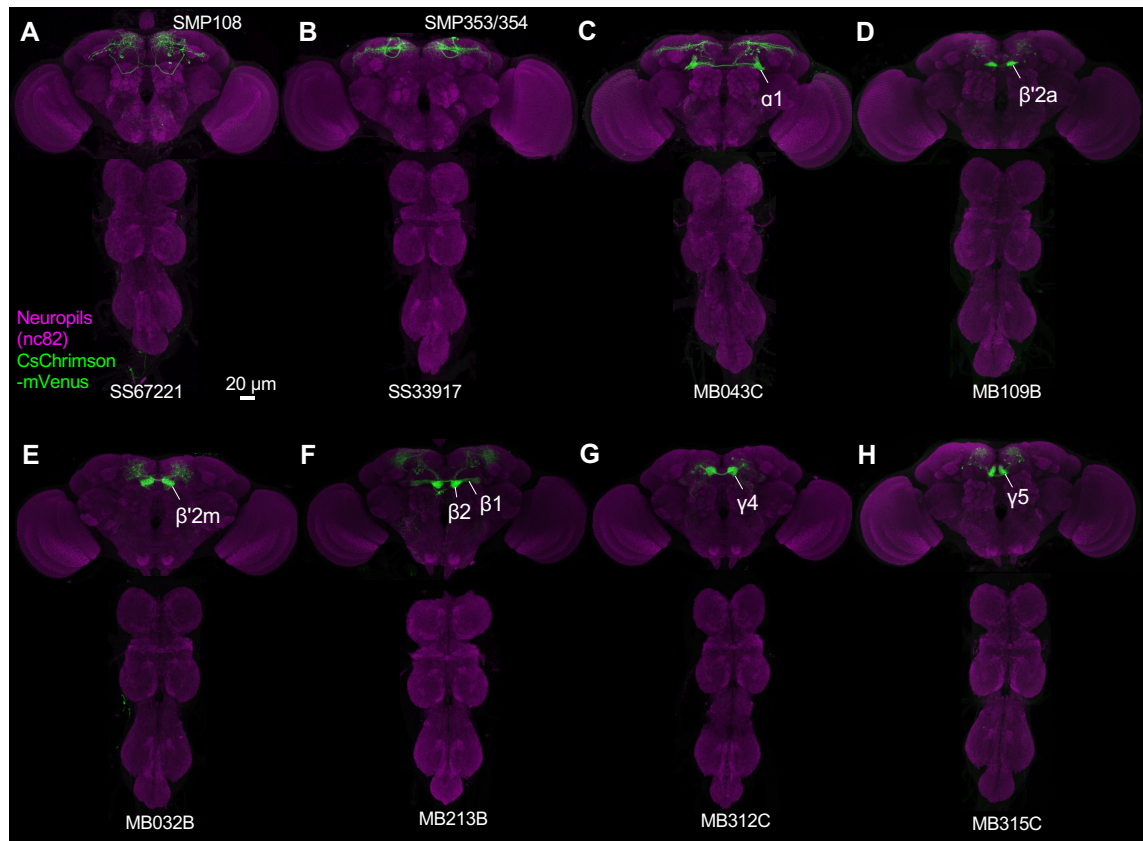

**Figure 8-figure supplement 1 Expression patterns of drivers**

Supplement: supp [file elife-79042-supp-v1.zip]

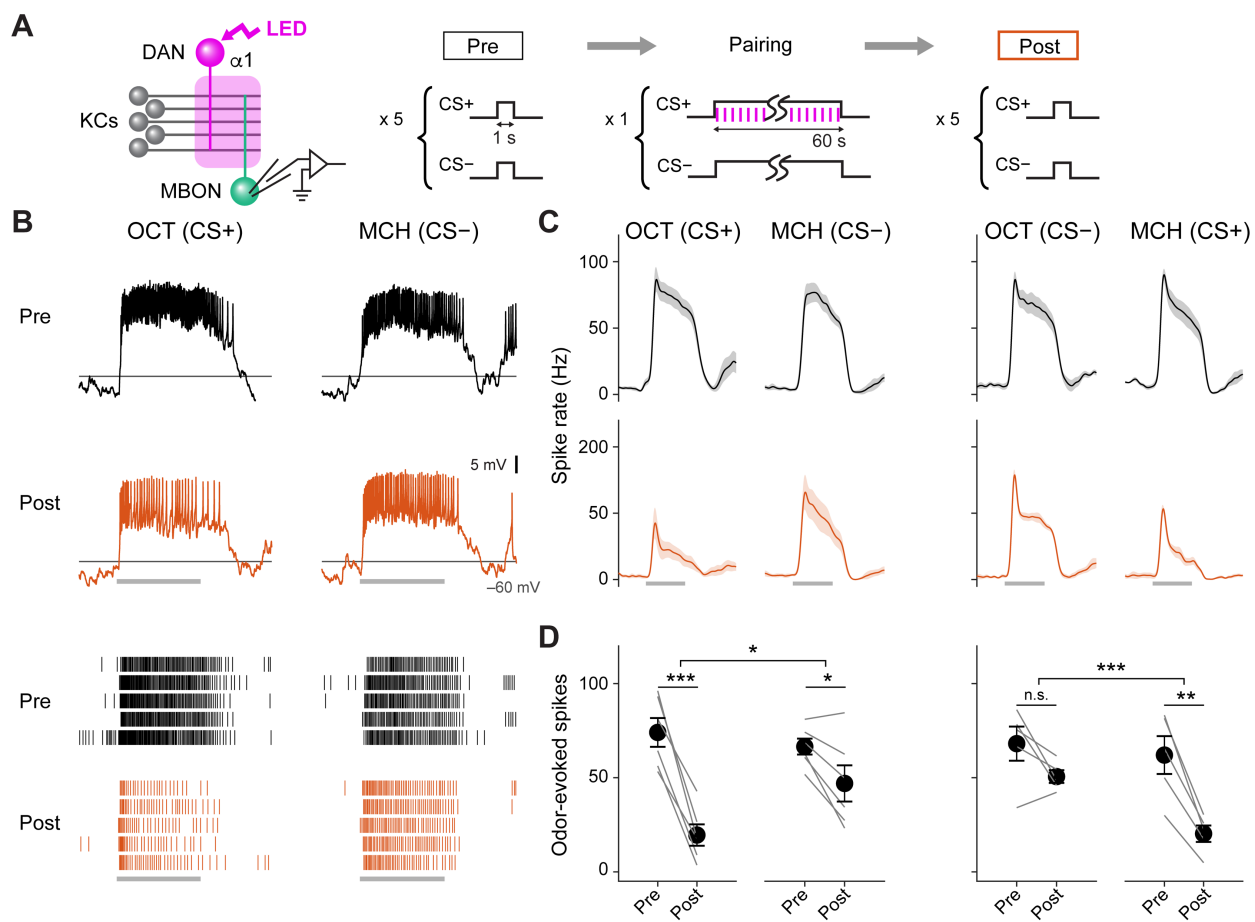

**Figure 3-figure supplement 2**

Supplement: supp [file elife-79042-supp-v1.zip]

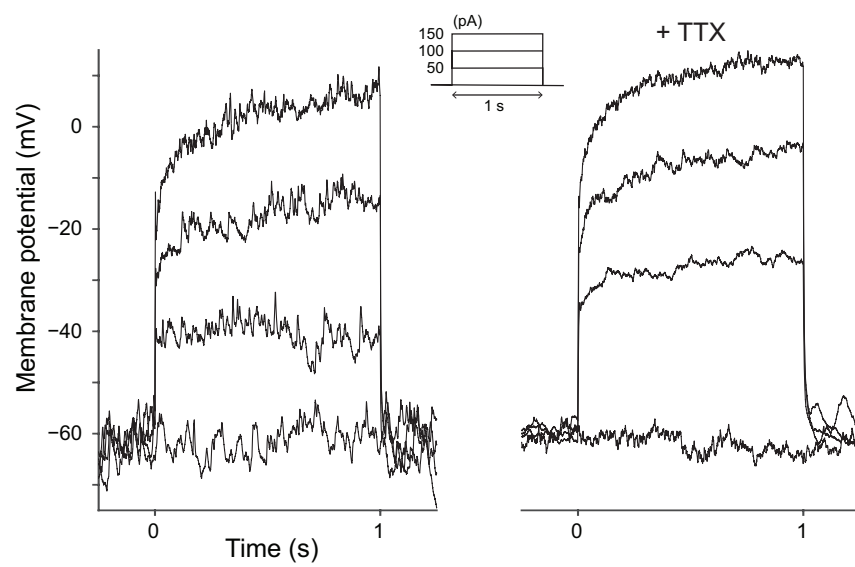

**Figure 3-figure supplement 3**

Supplement: supp [file elife-79042-supp-v1.zip]
